# Supplementary material for: Fine-mapping a genome-wide meta-analysis of 98,374 migraine cases identifies 181 sets of candidate causal variants
Source: PubMed Central journal article supplement (PMC11451805; doi:10.1101/2024.05.20.24307608), 2024-05-20

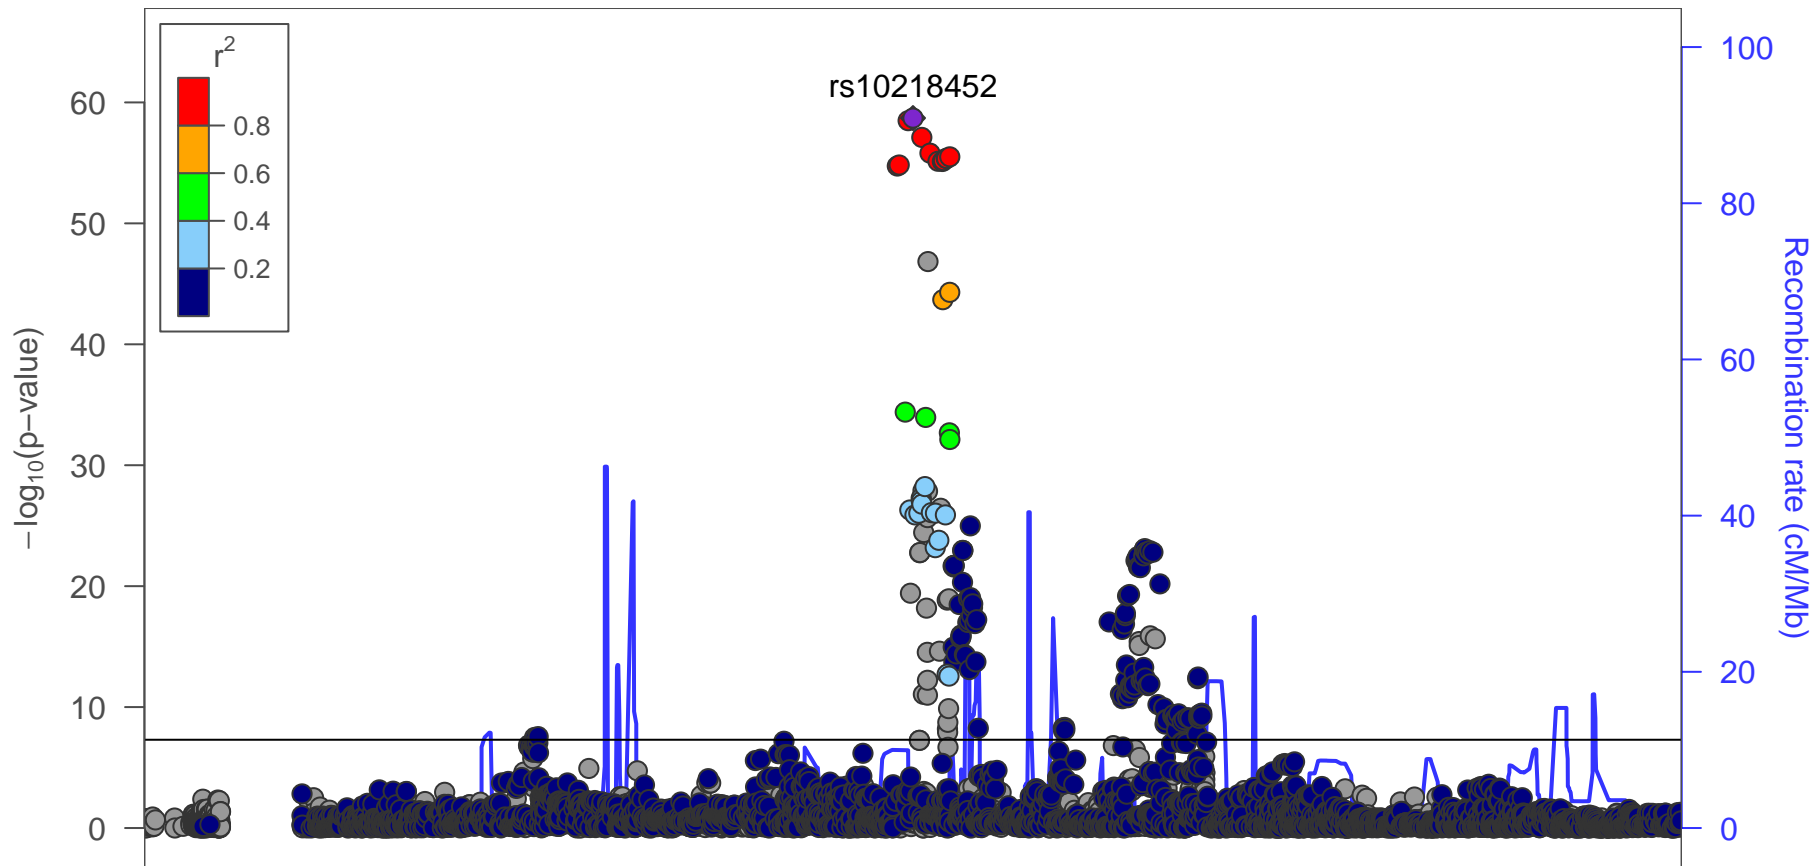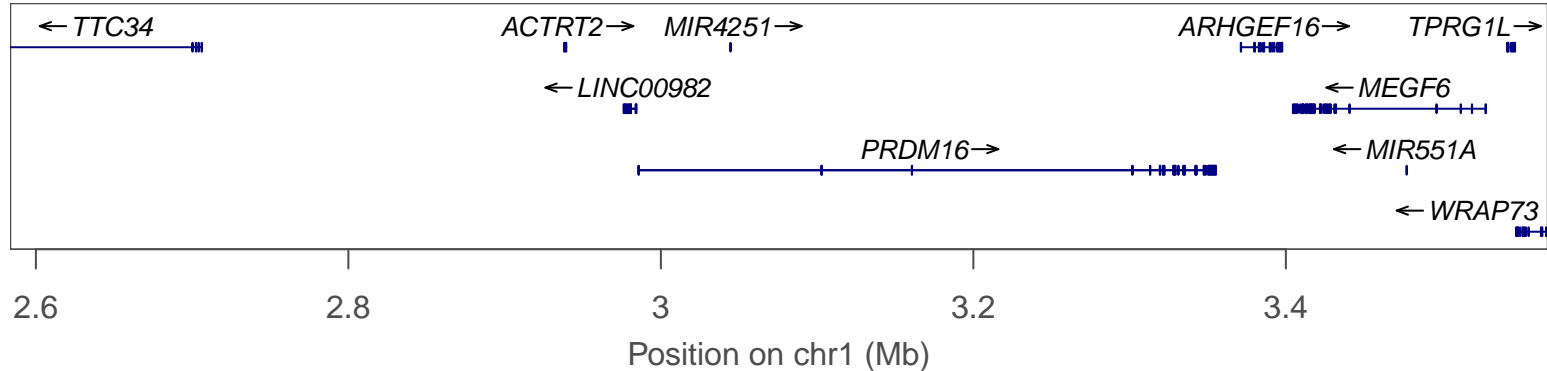

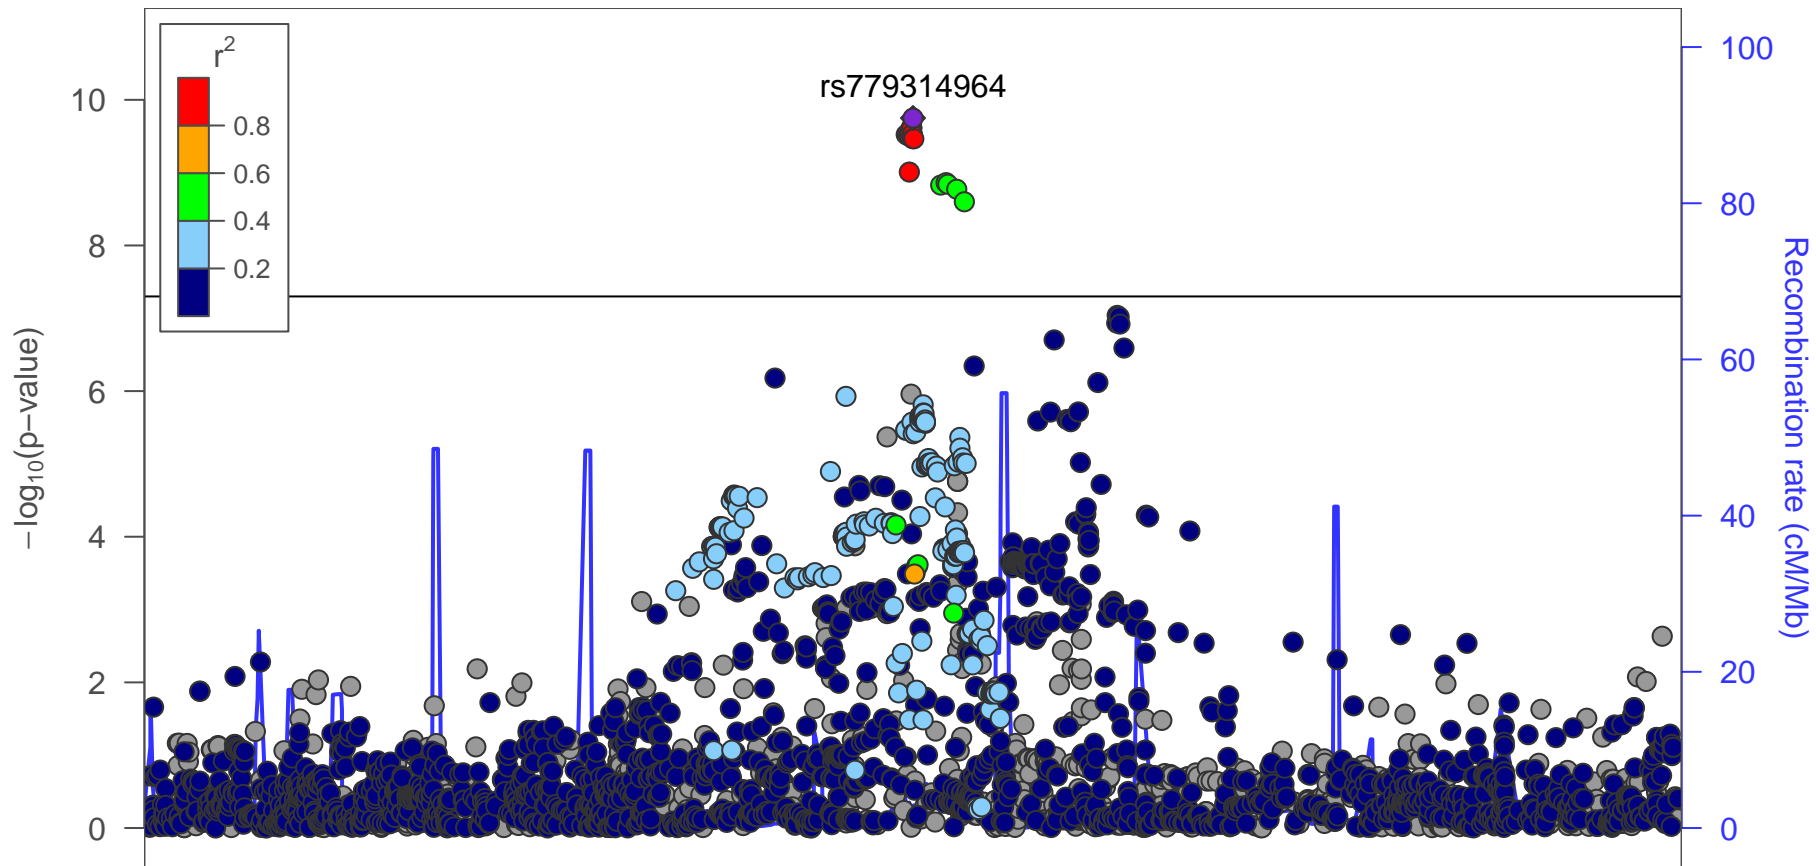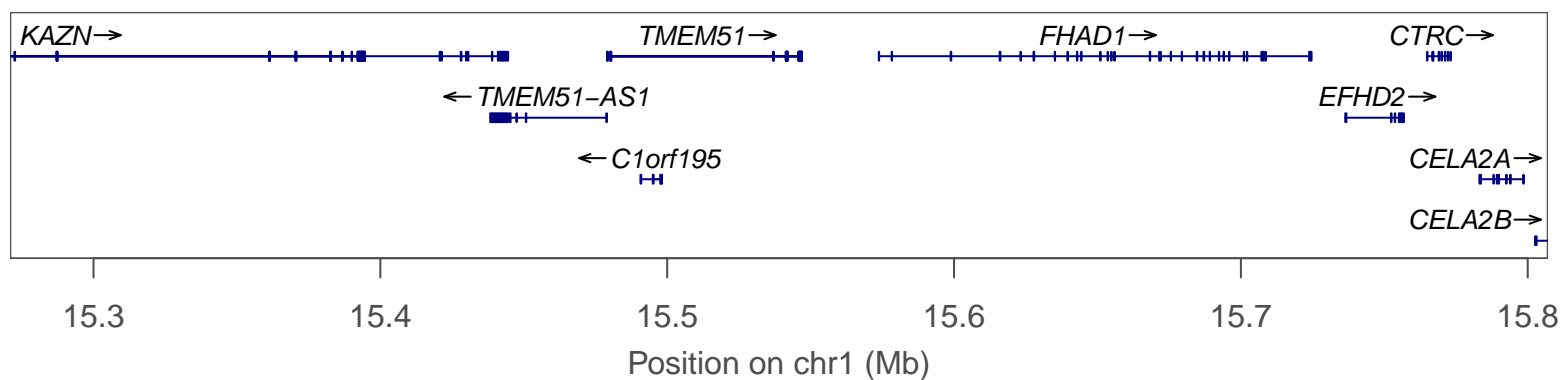

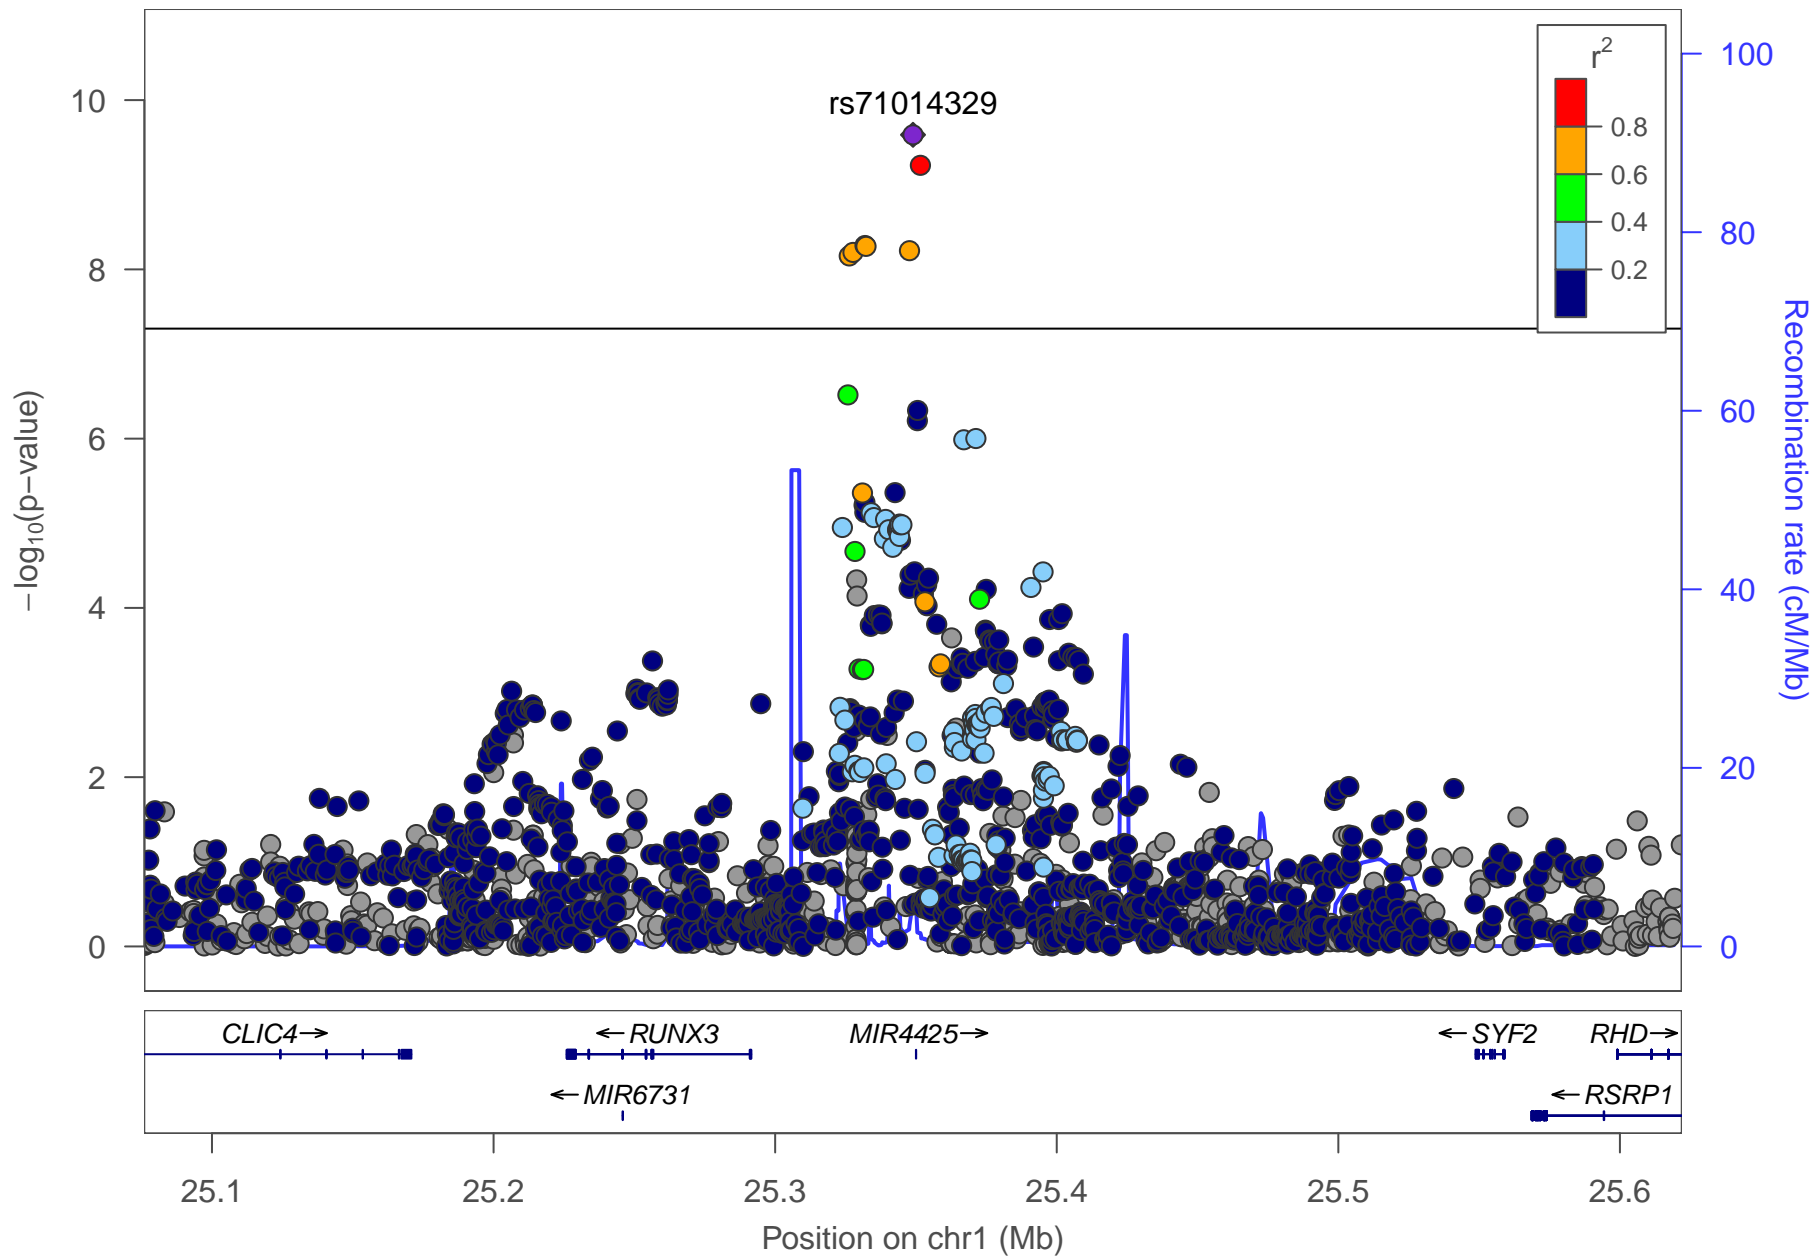

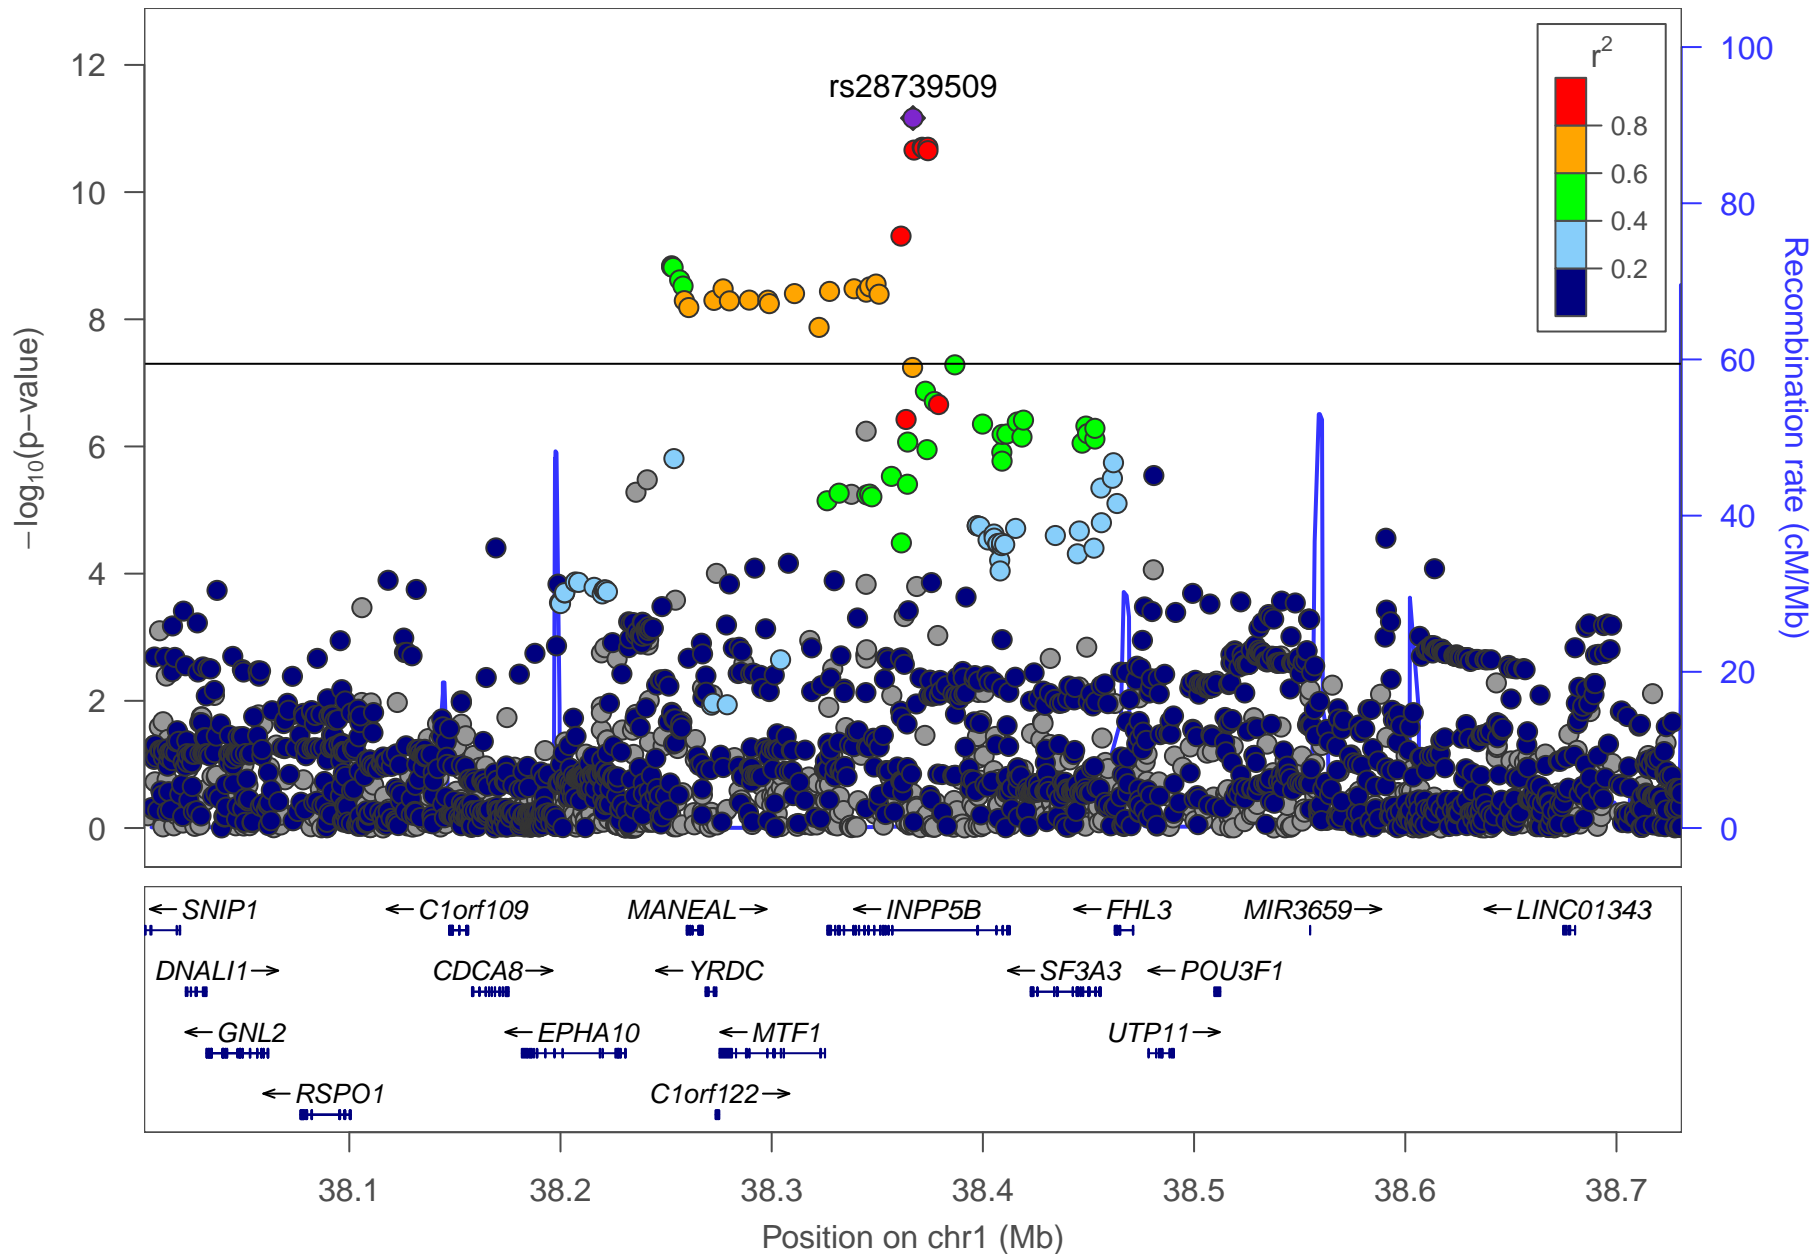

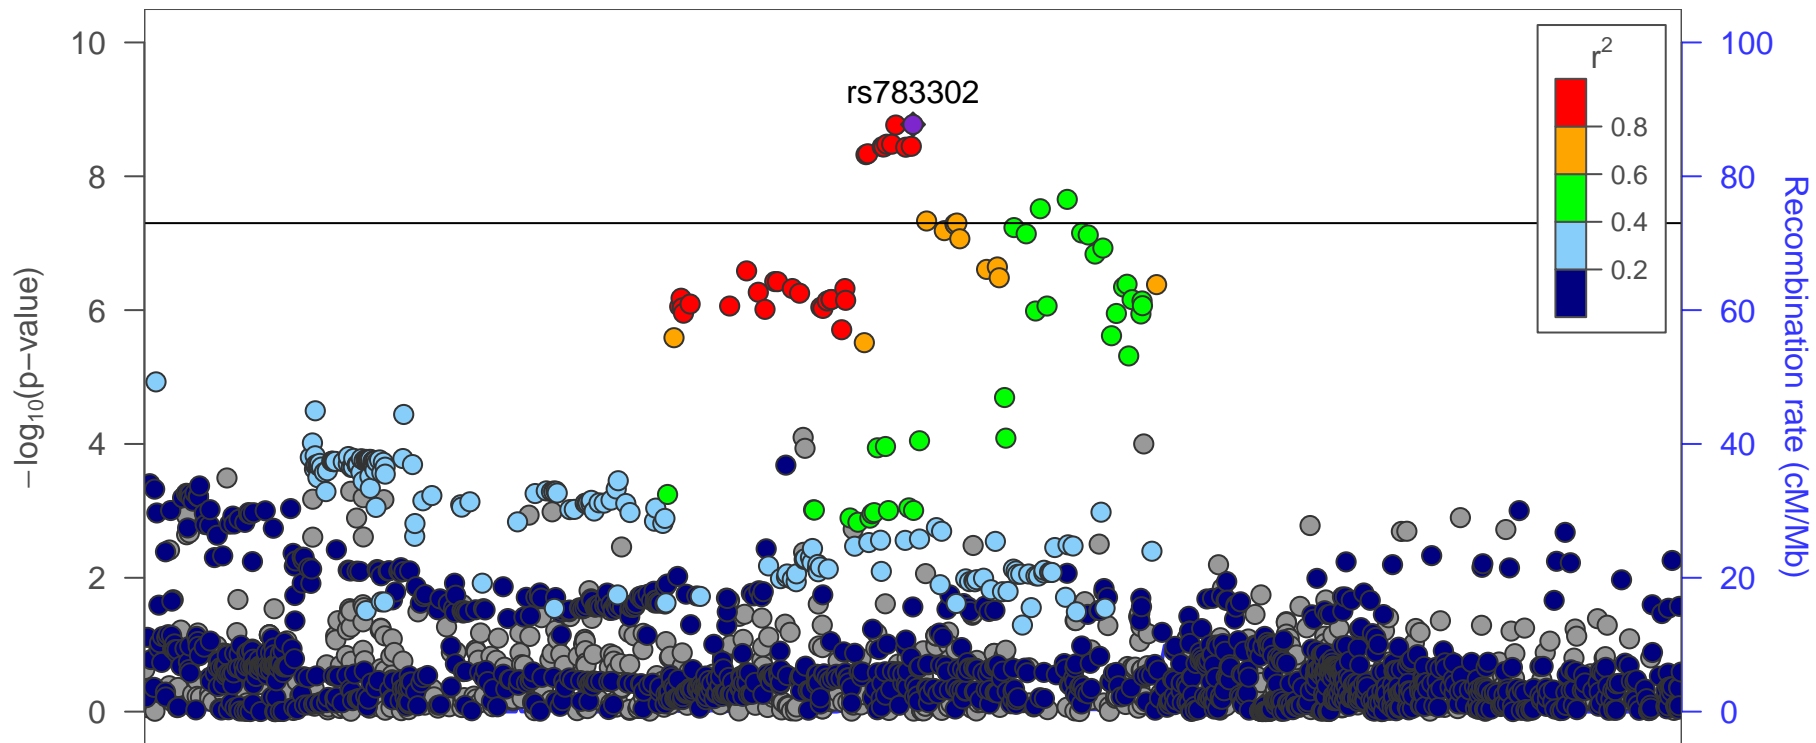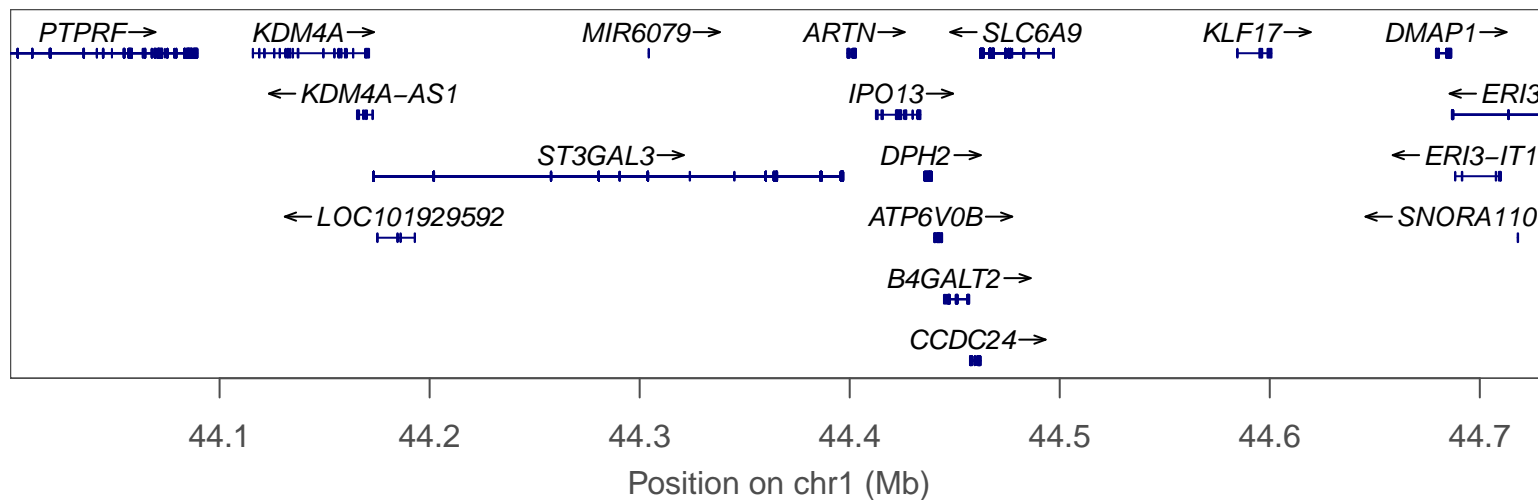

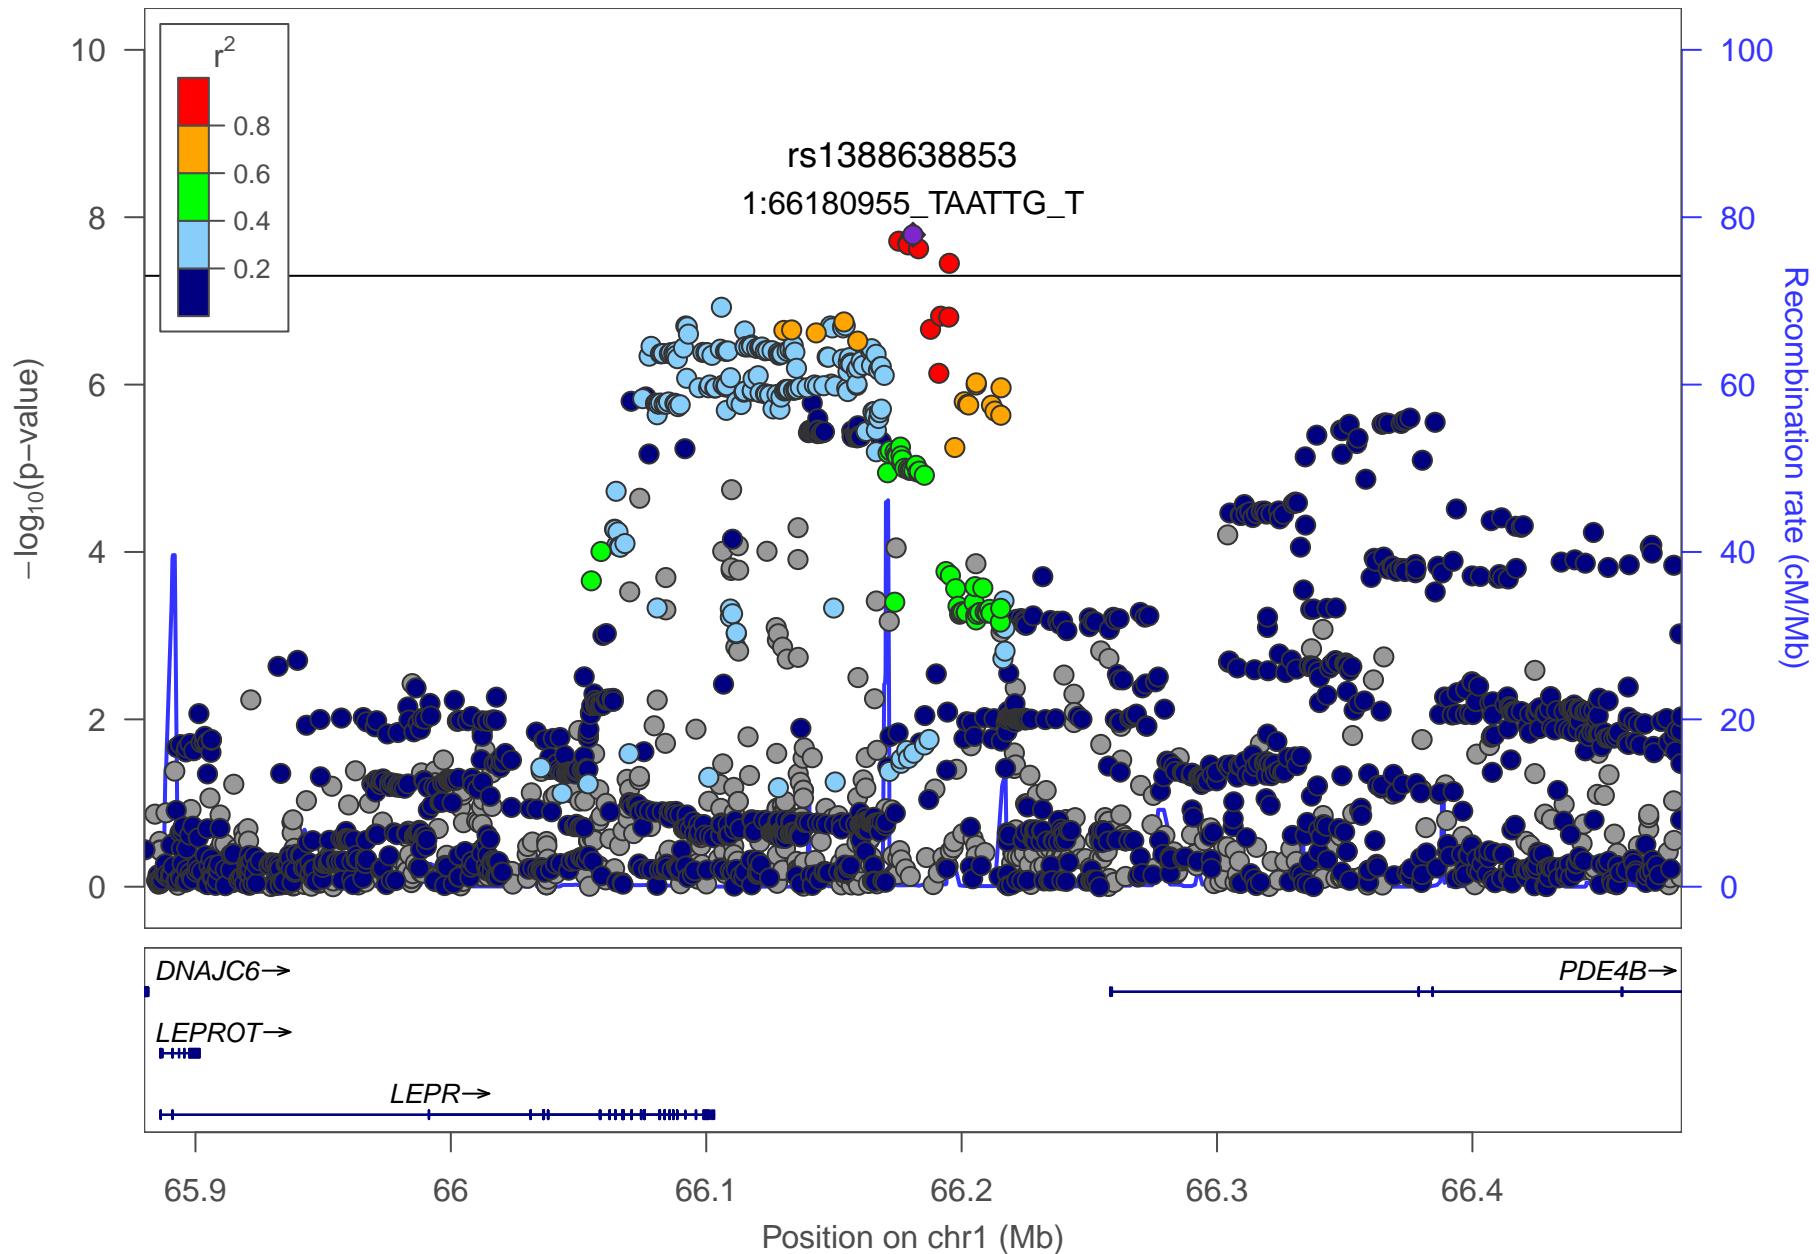

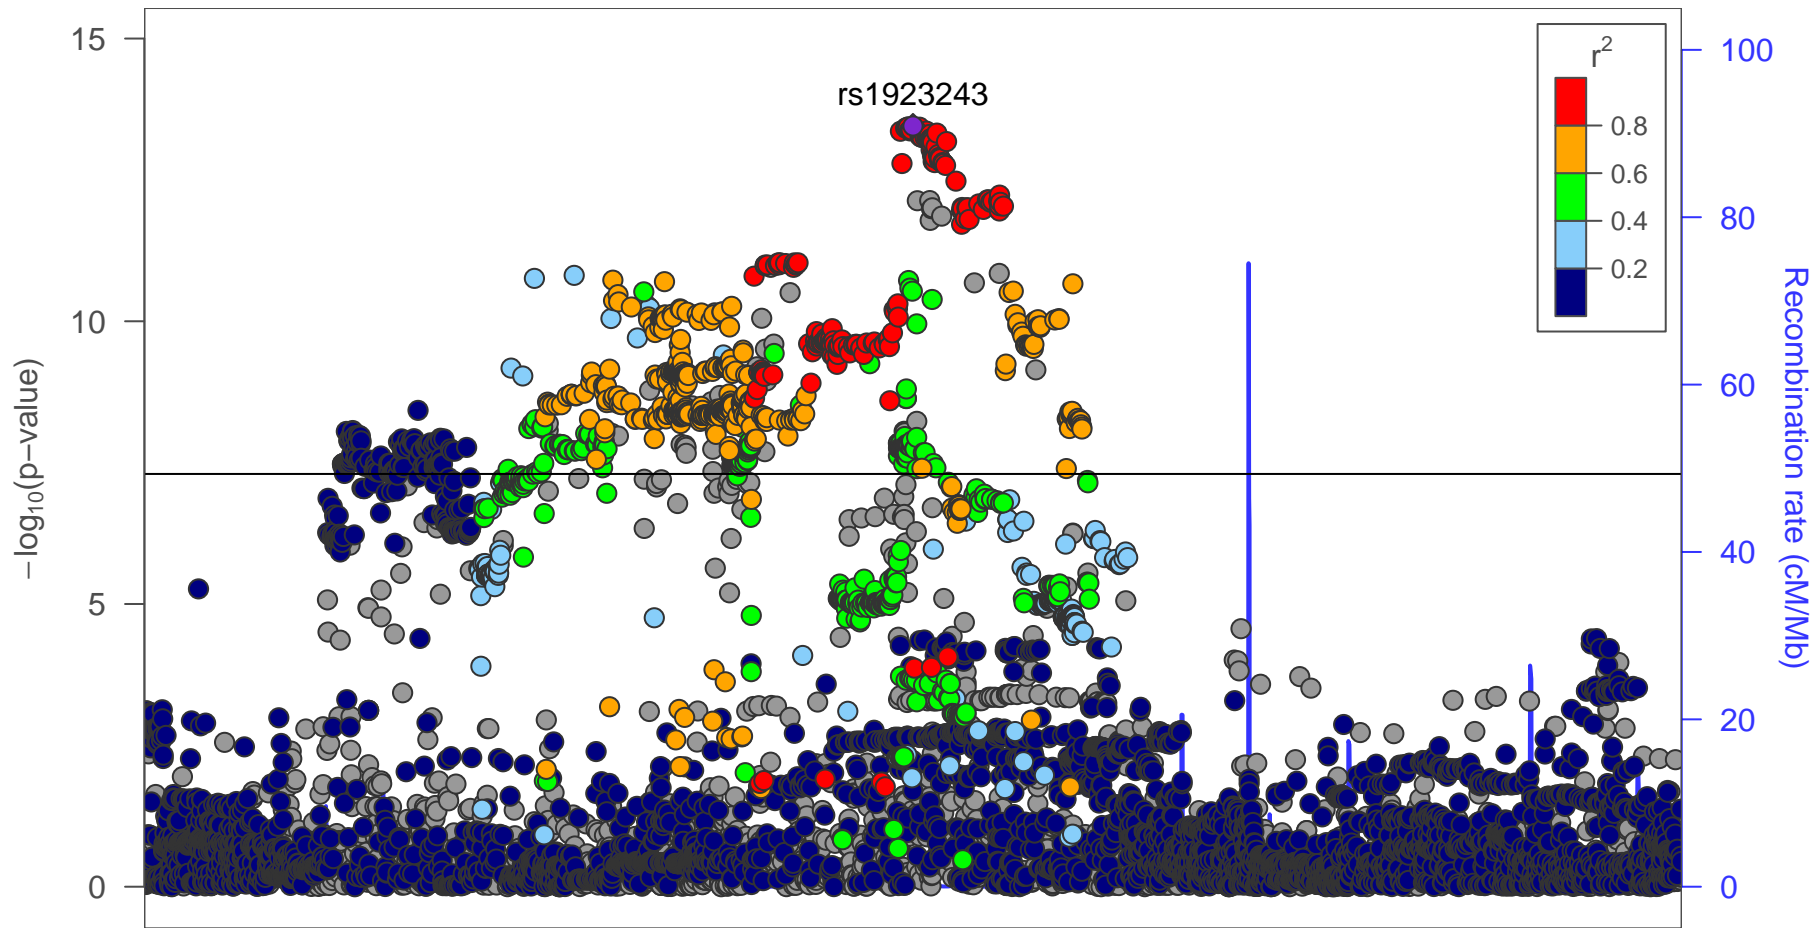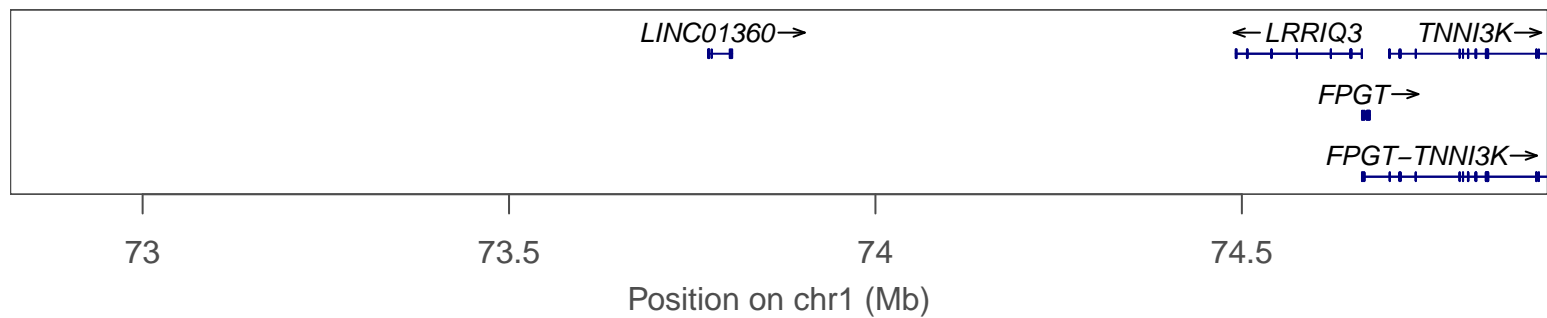

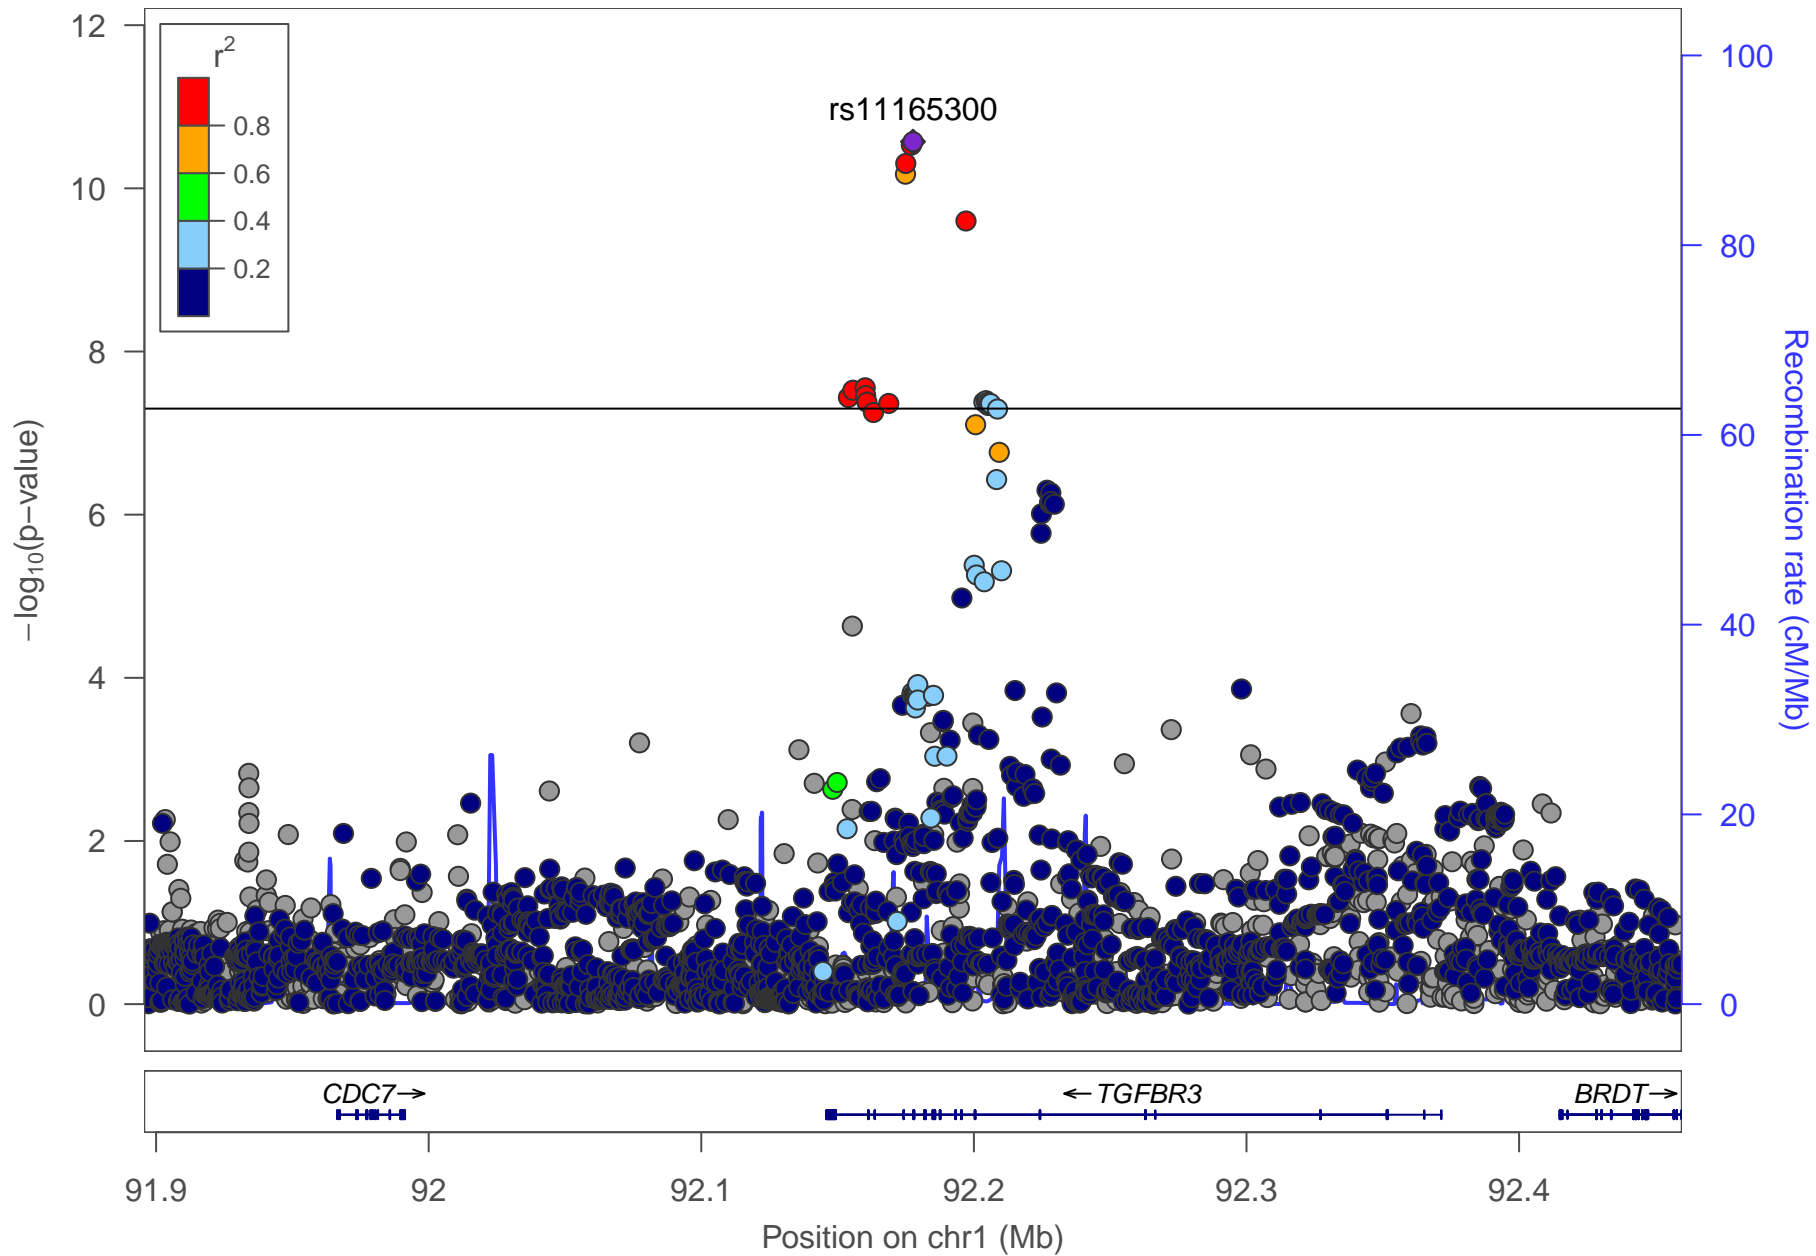





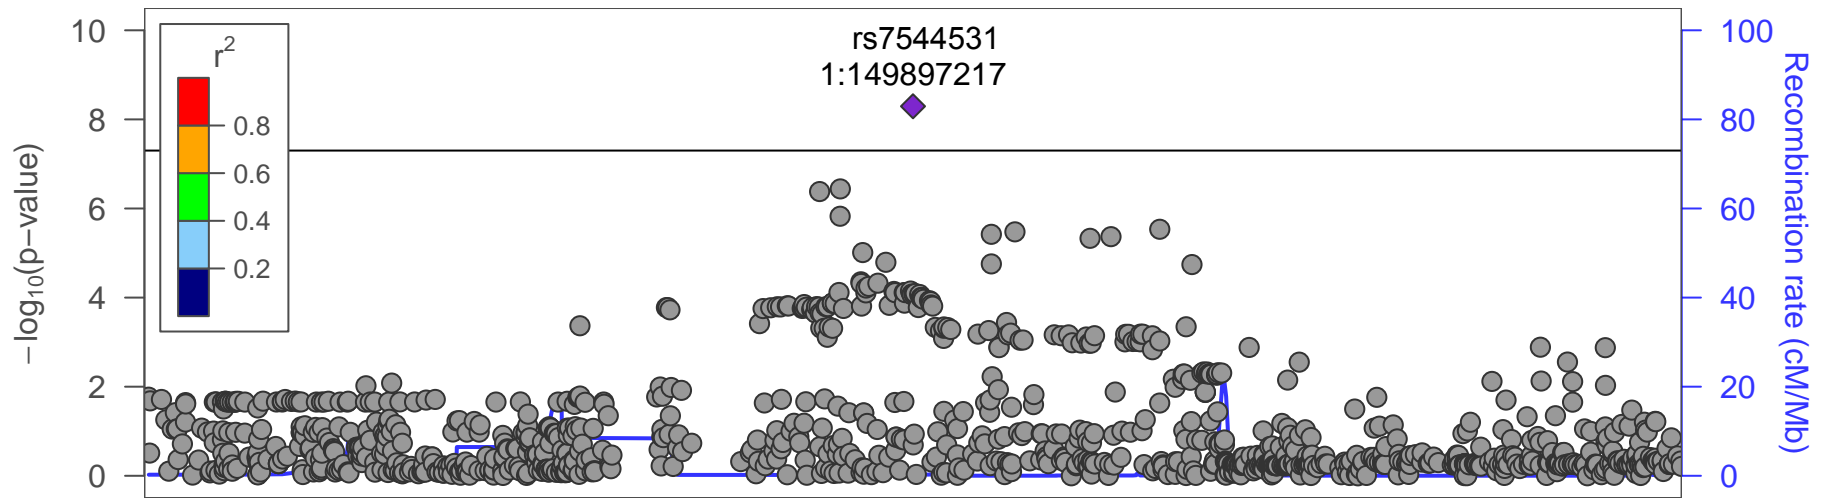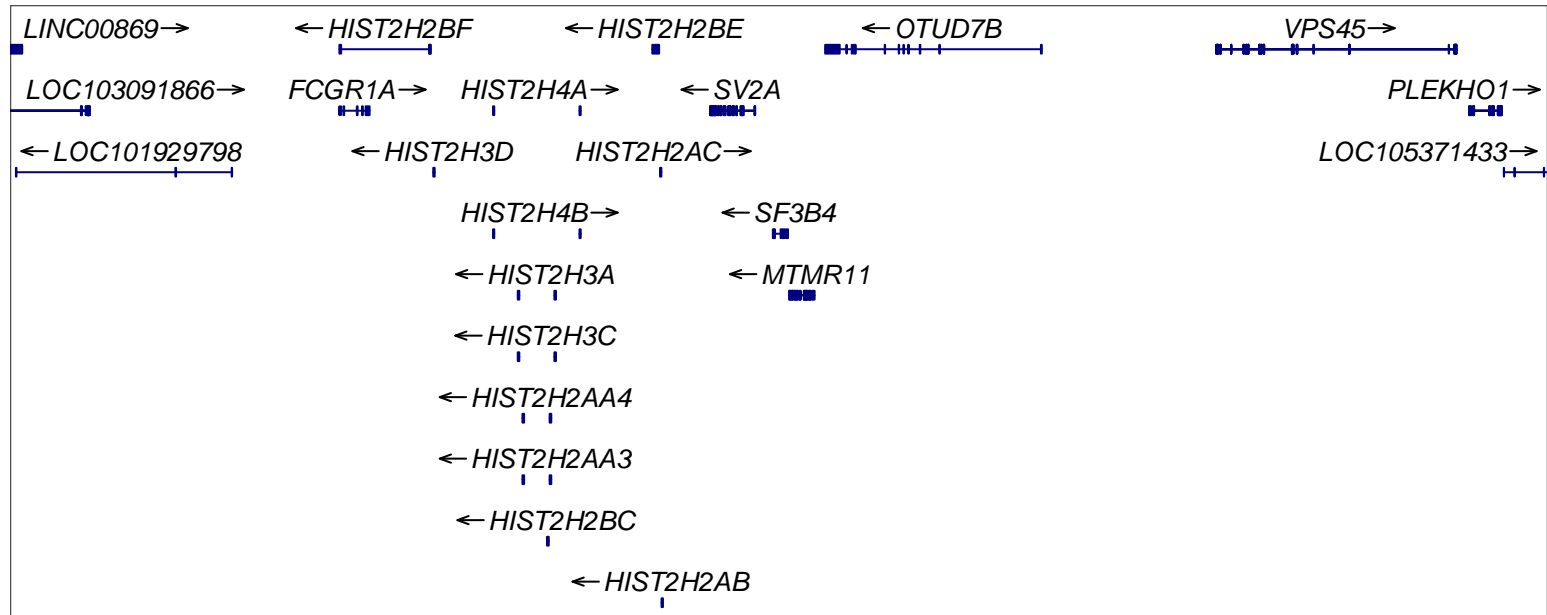

1 gene omitted

149.7                      149.8                      149.9                      150                      150.1

Position on chr1 (Mb)

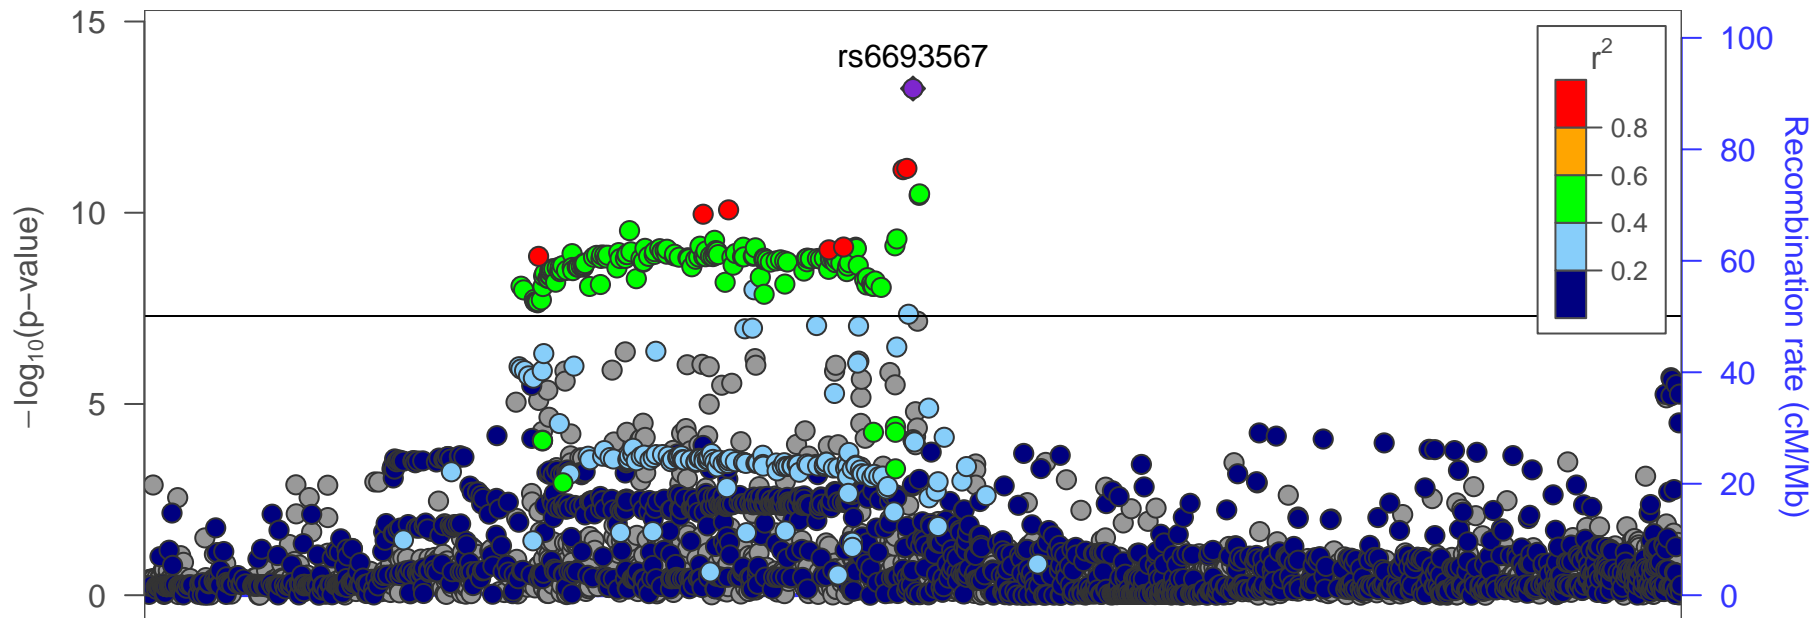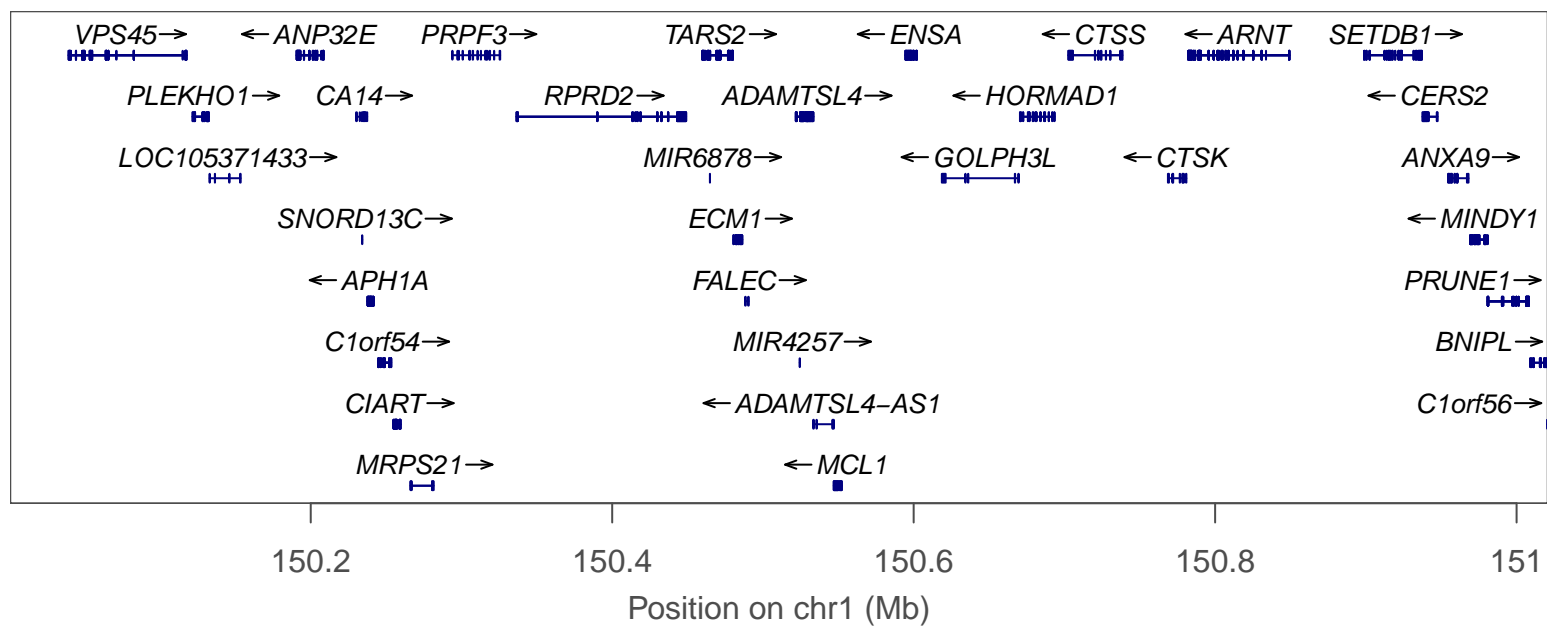

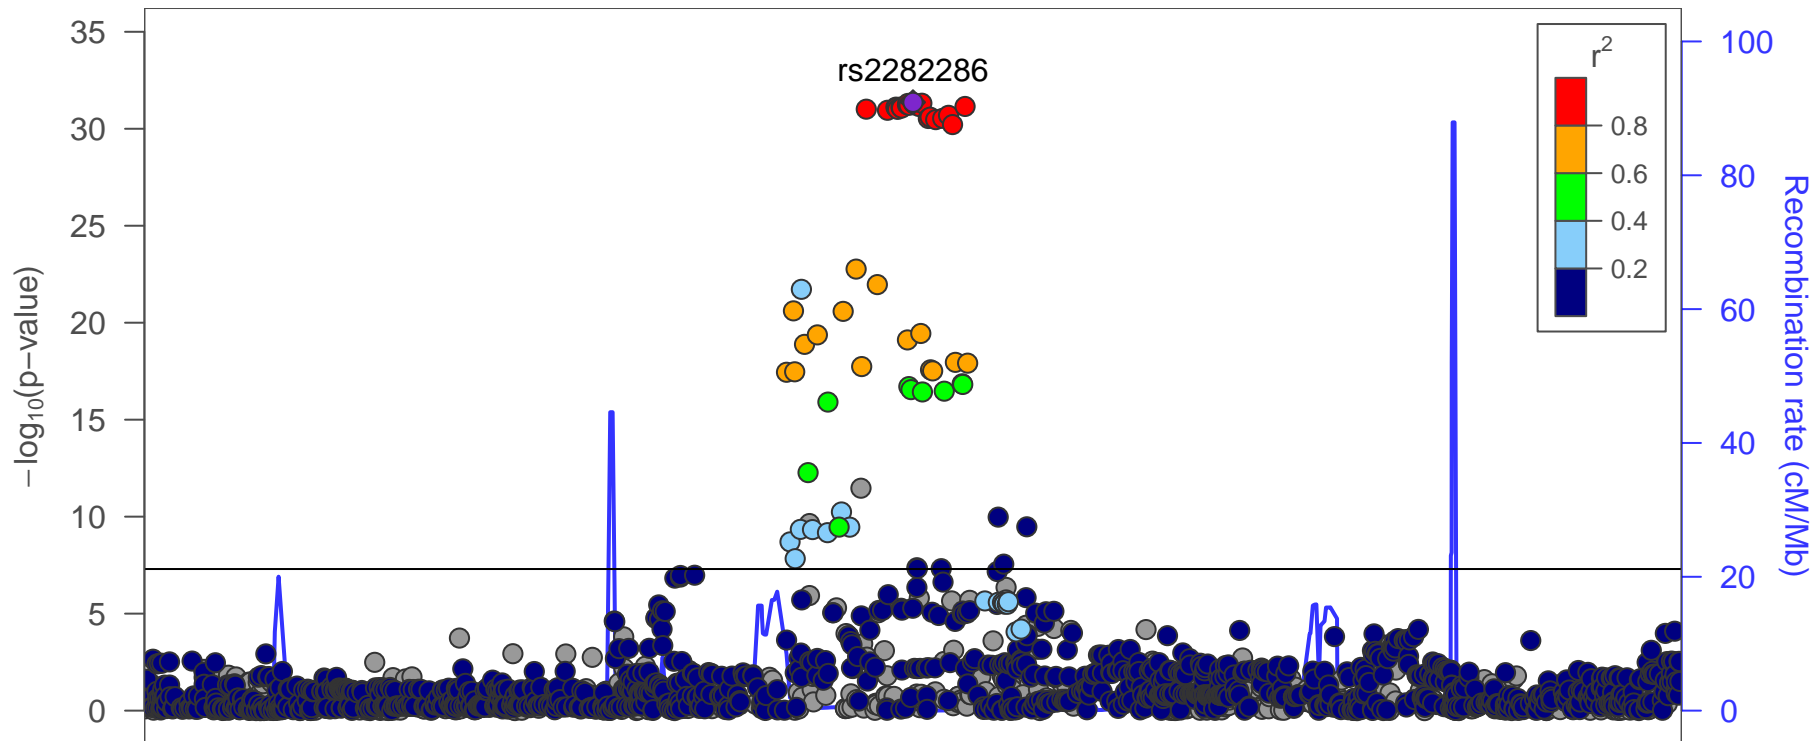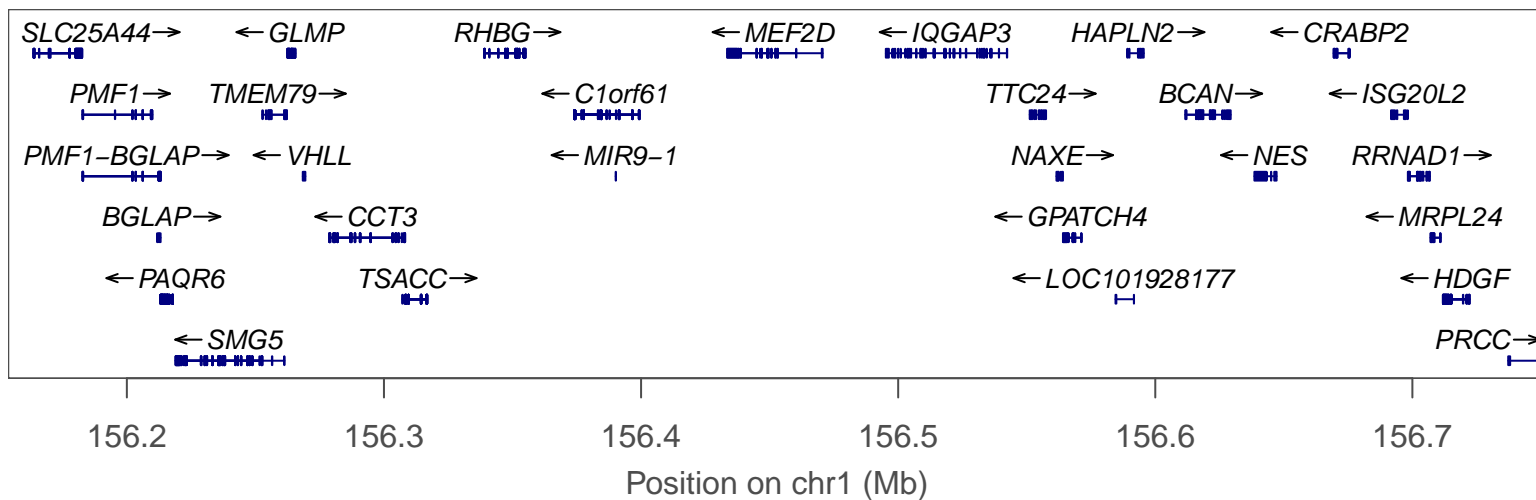

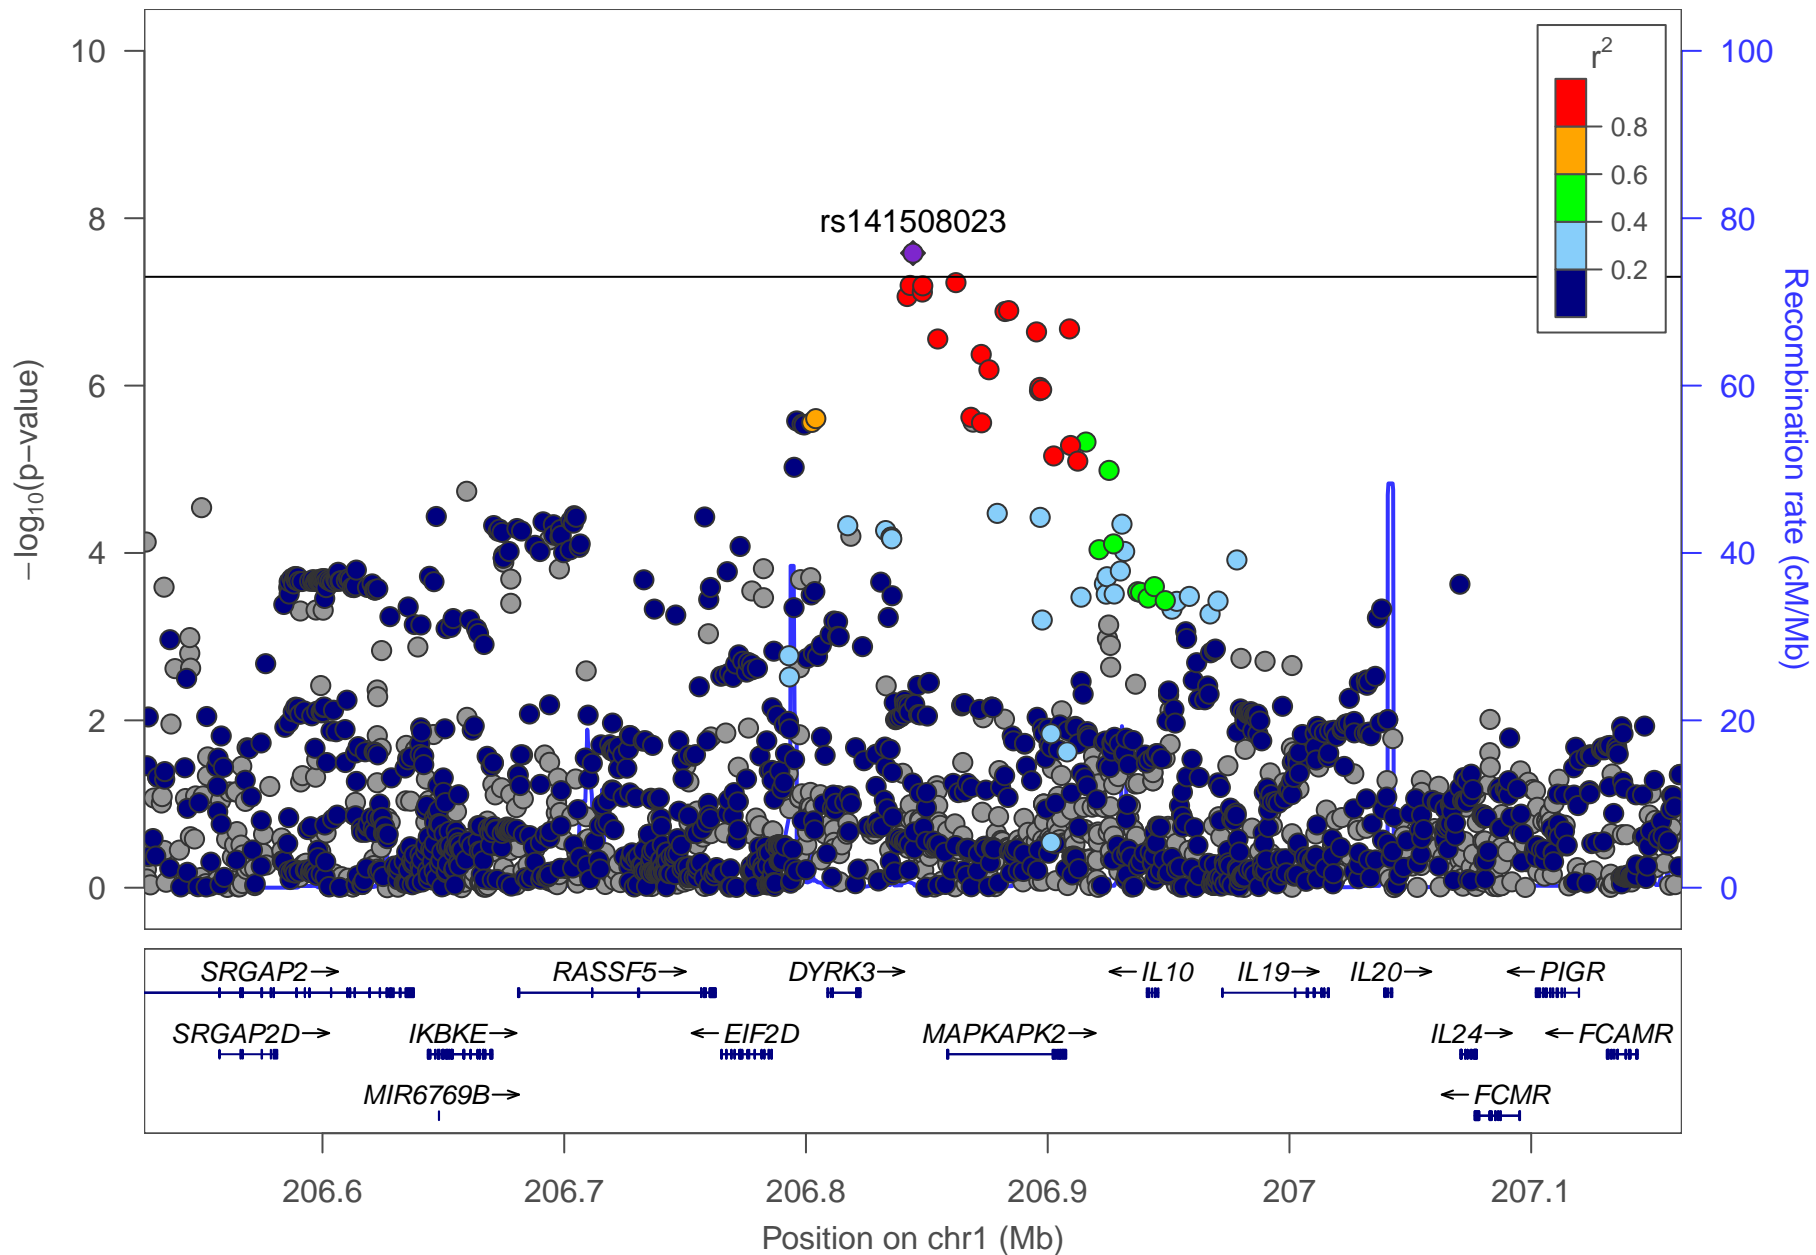

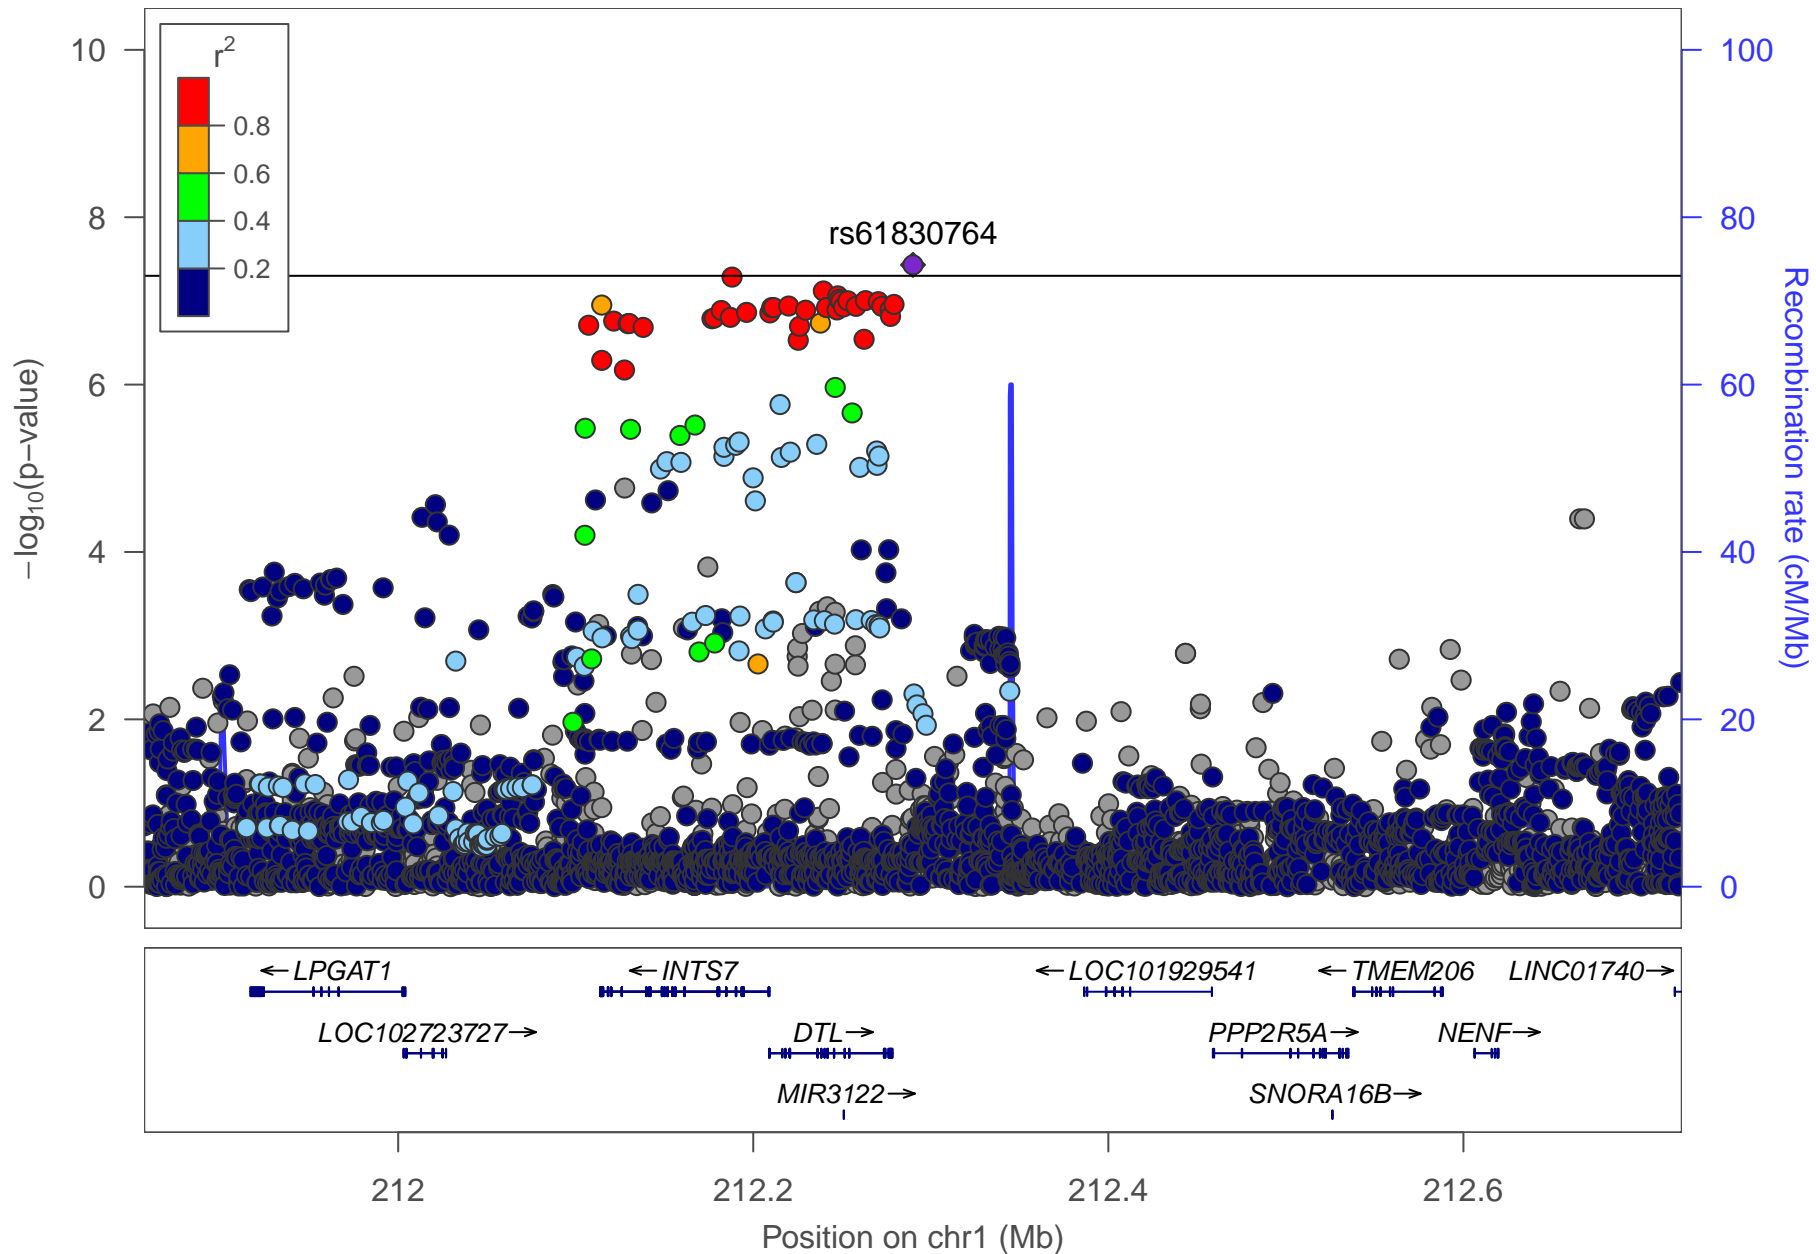

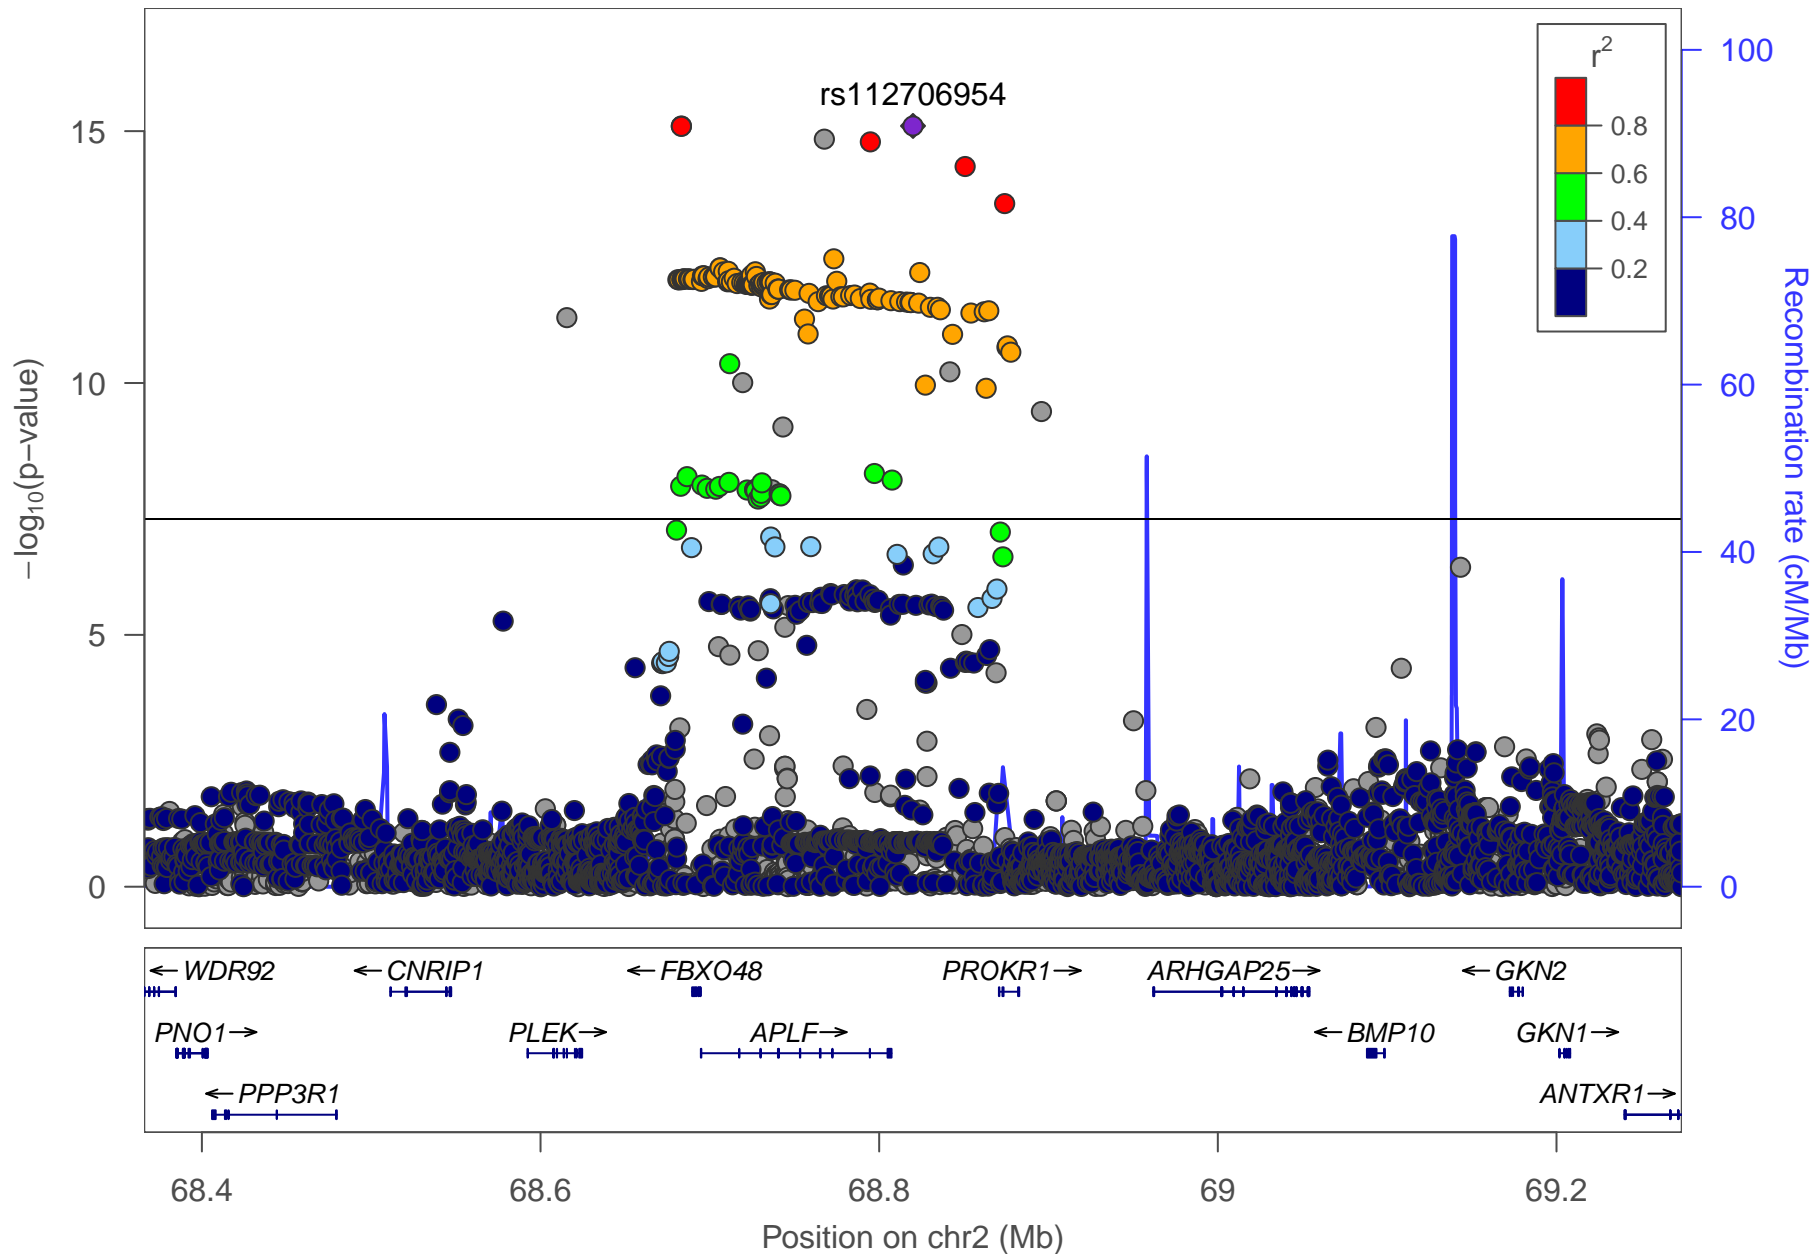

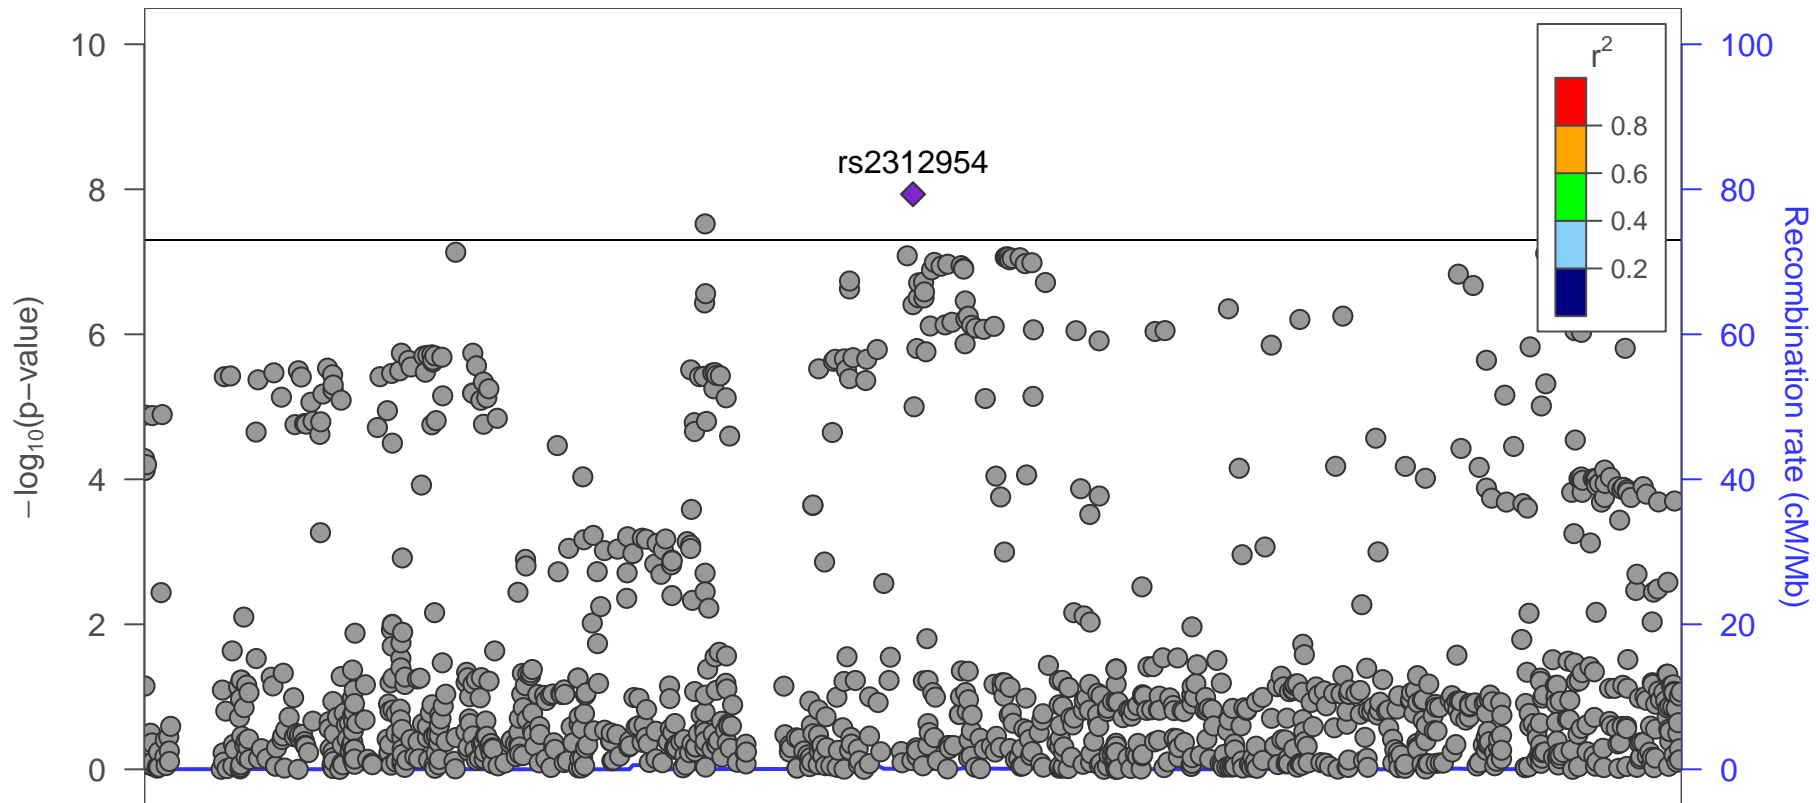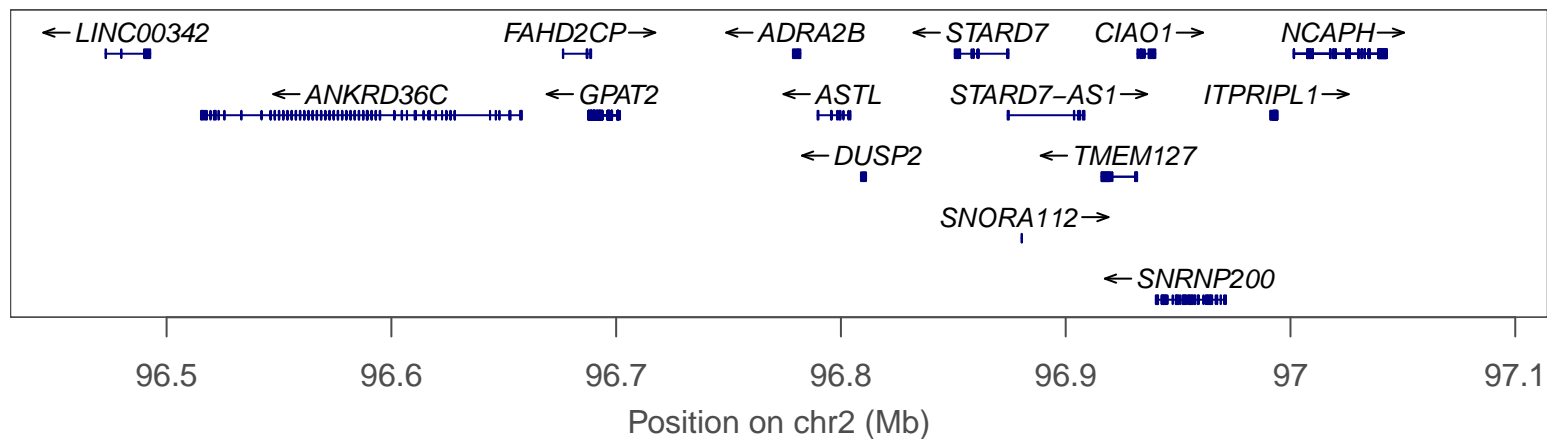



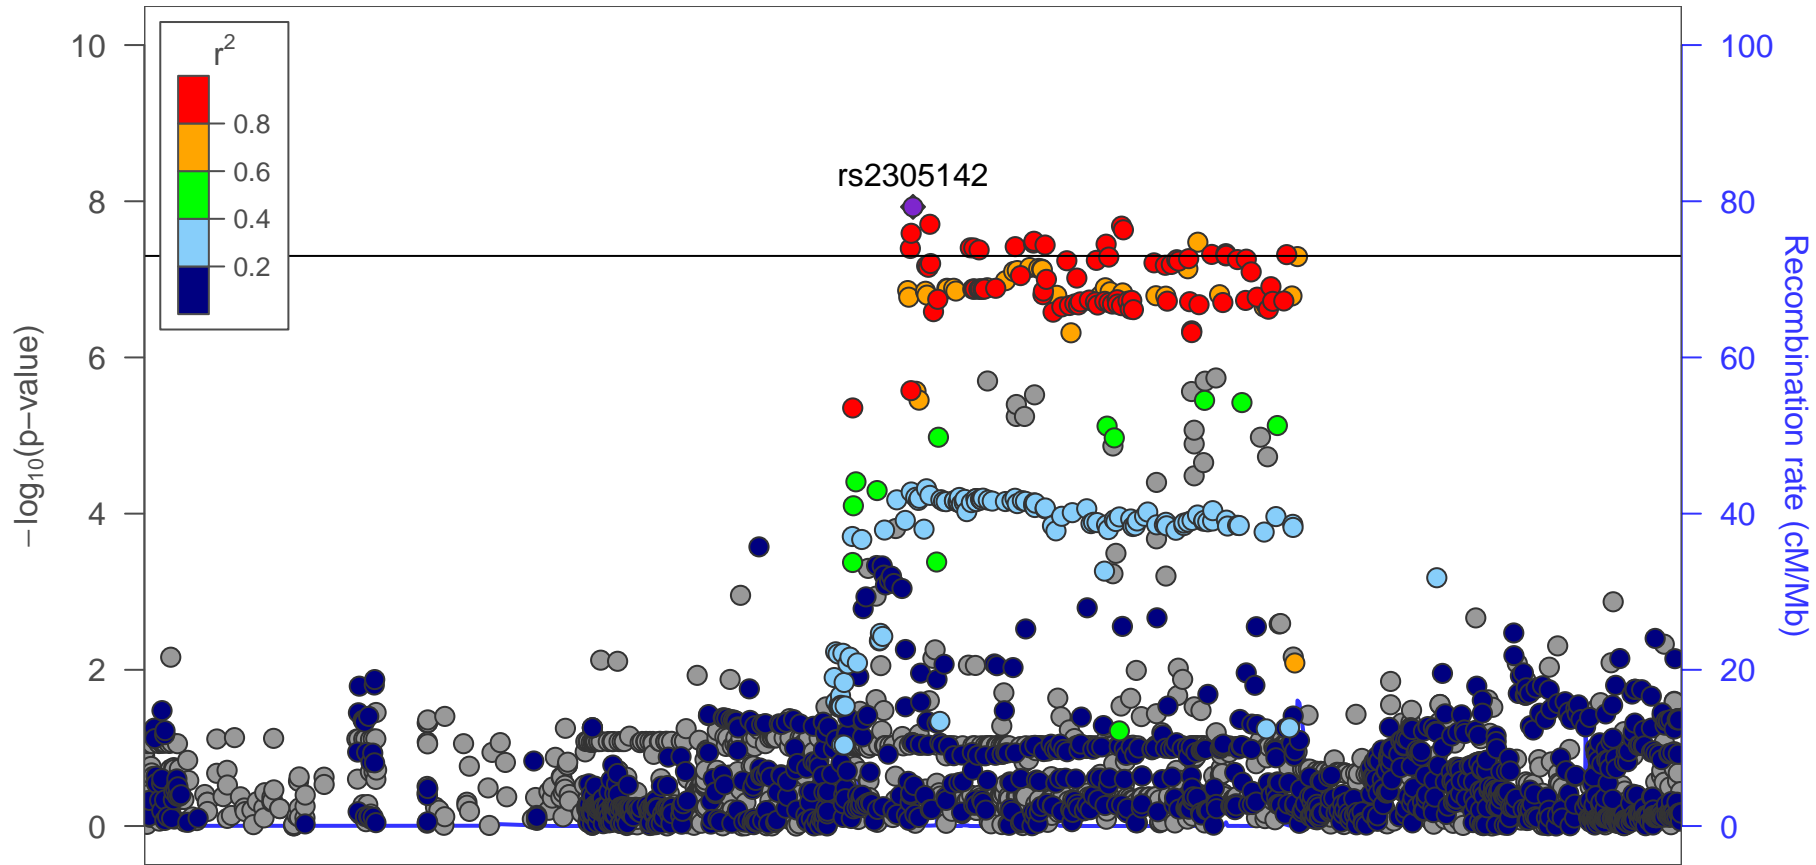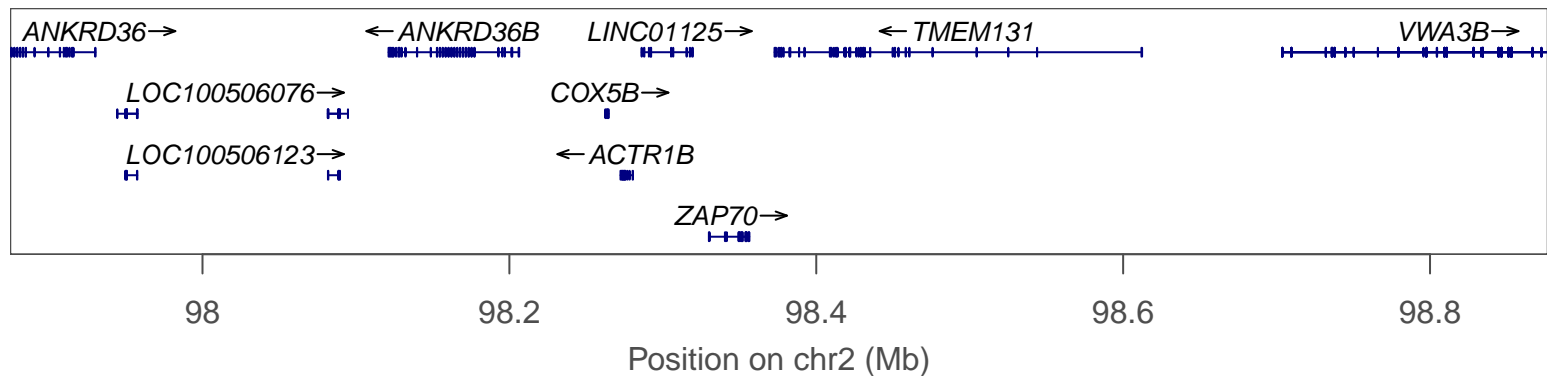

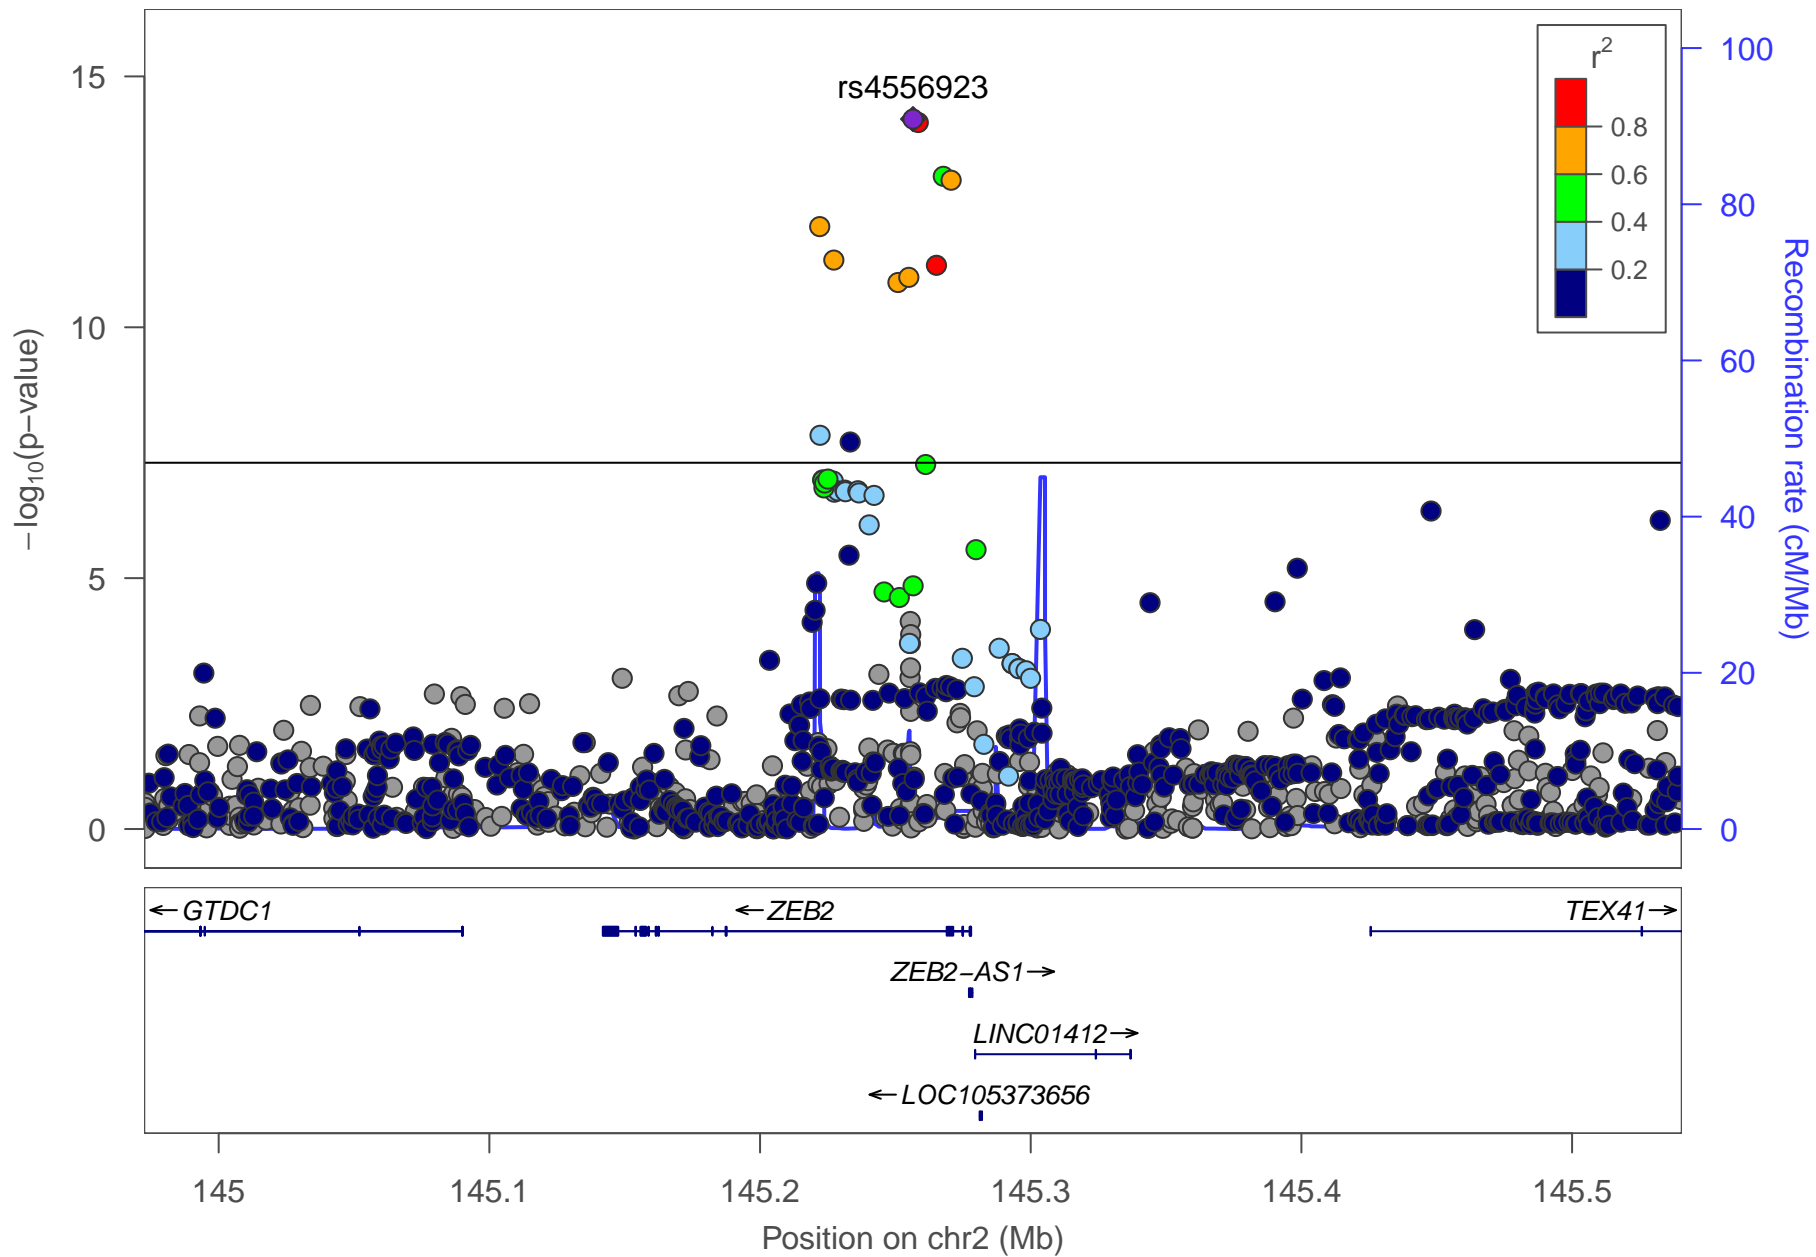

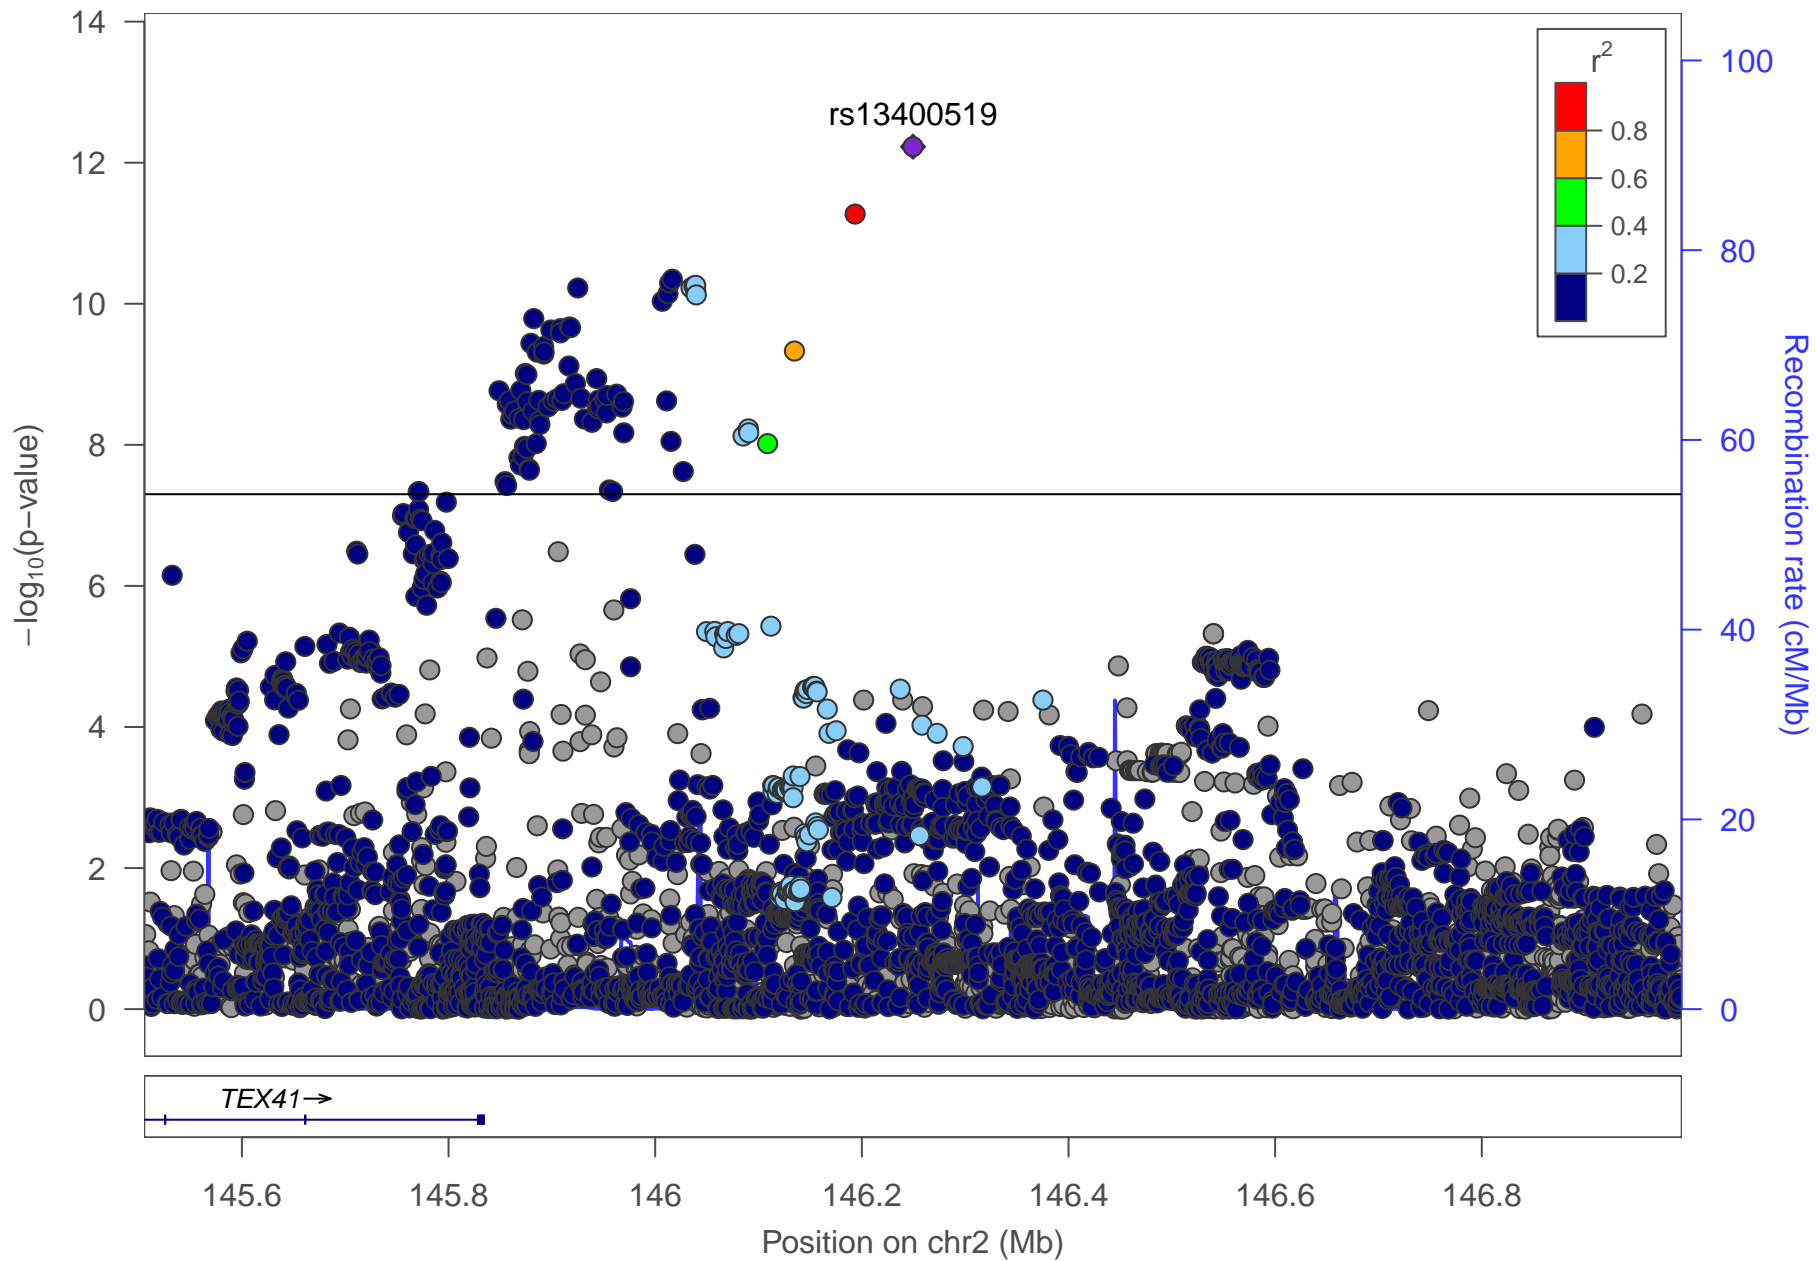

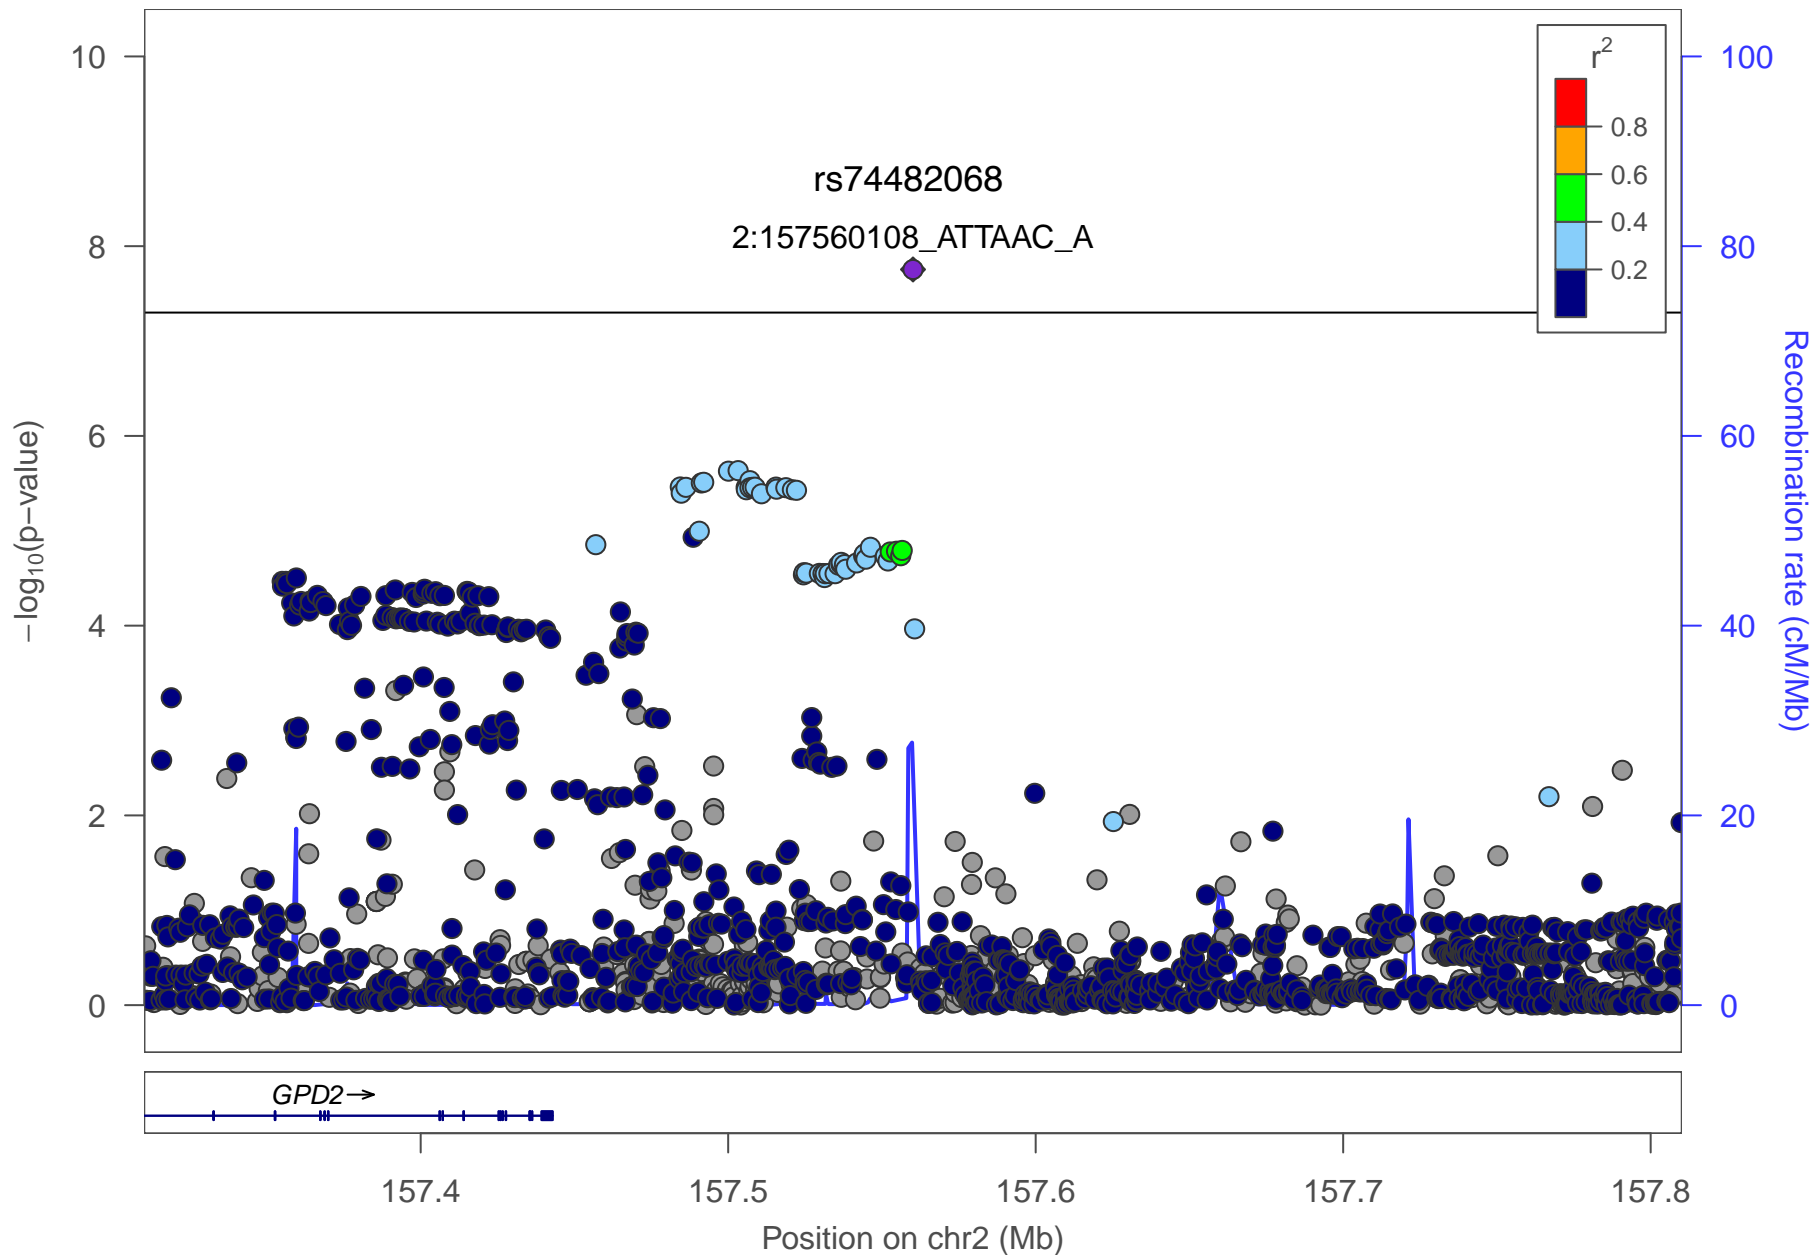

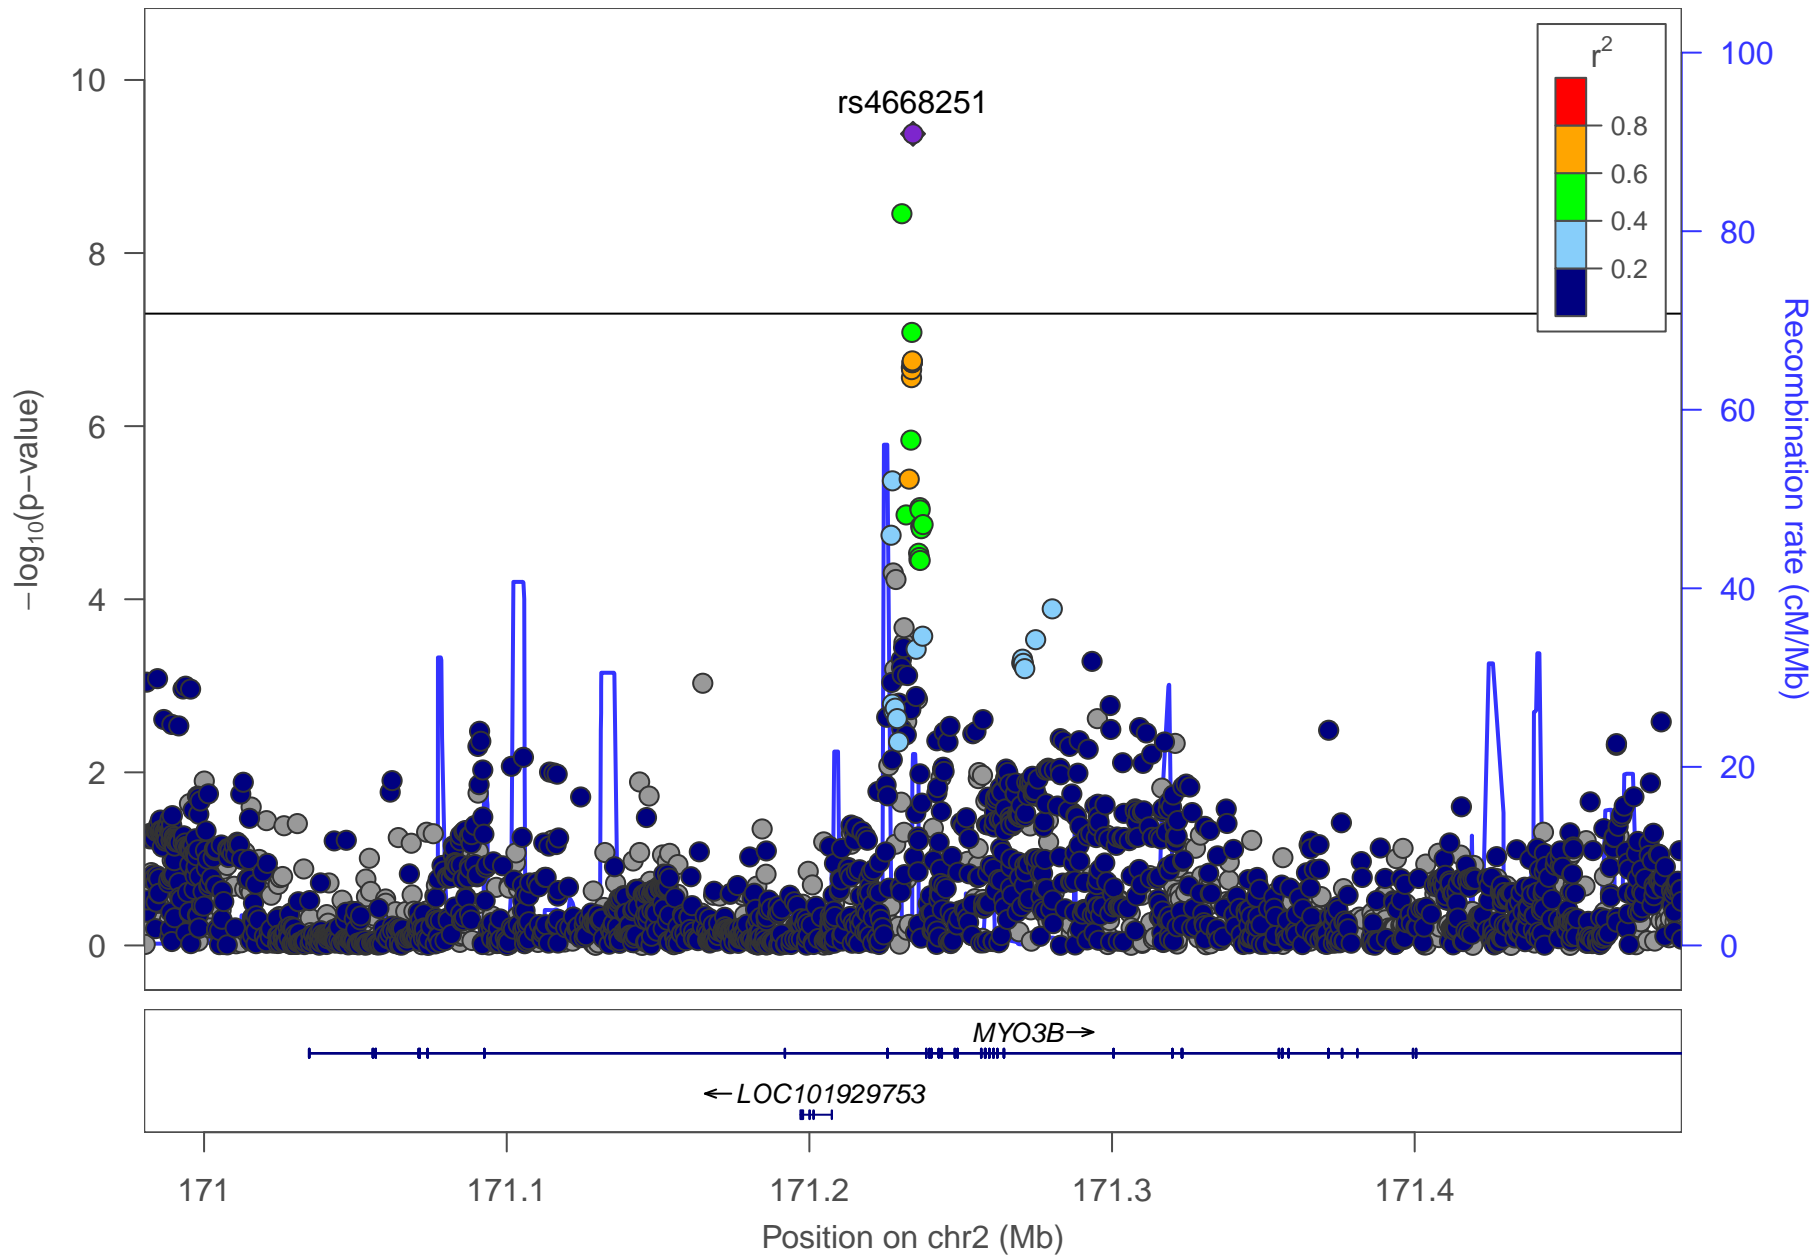

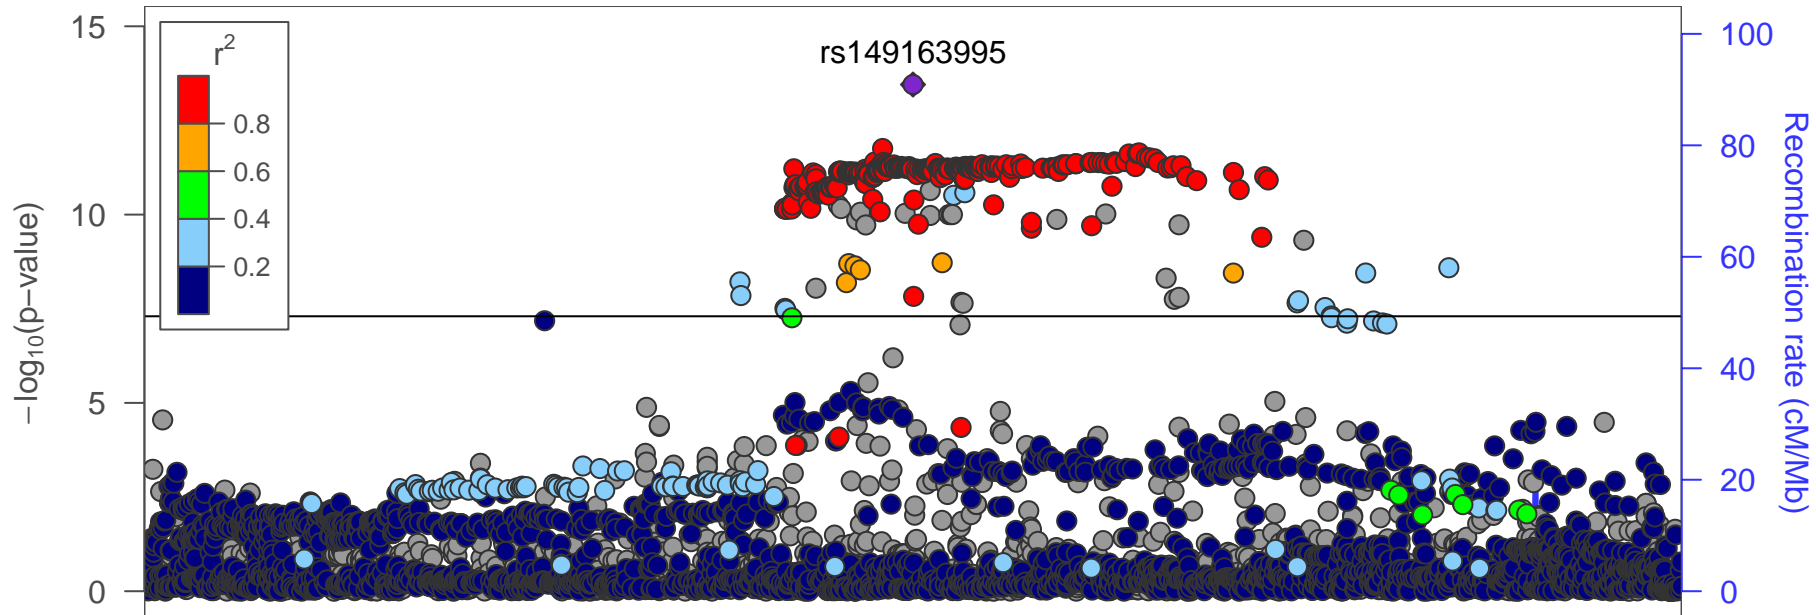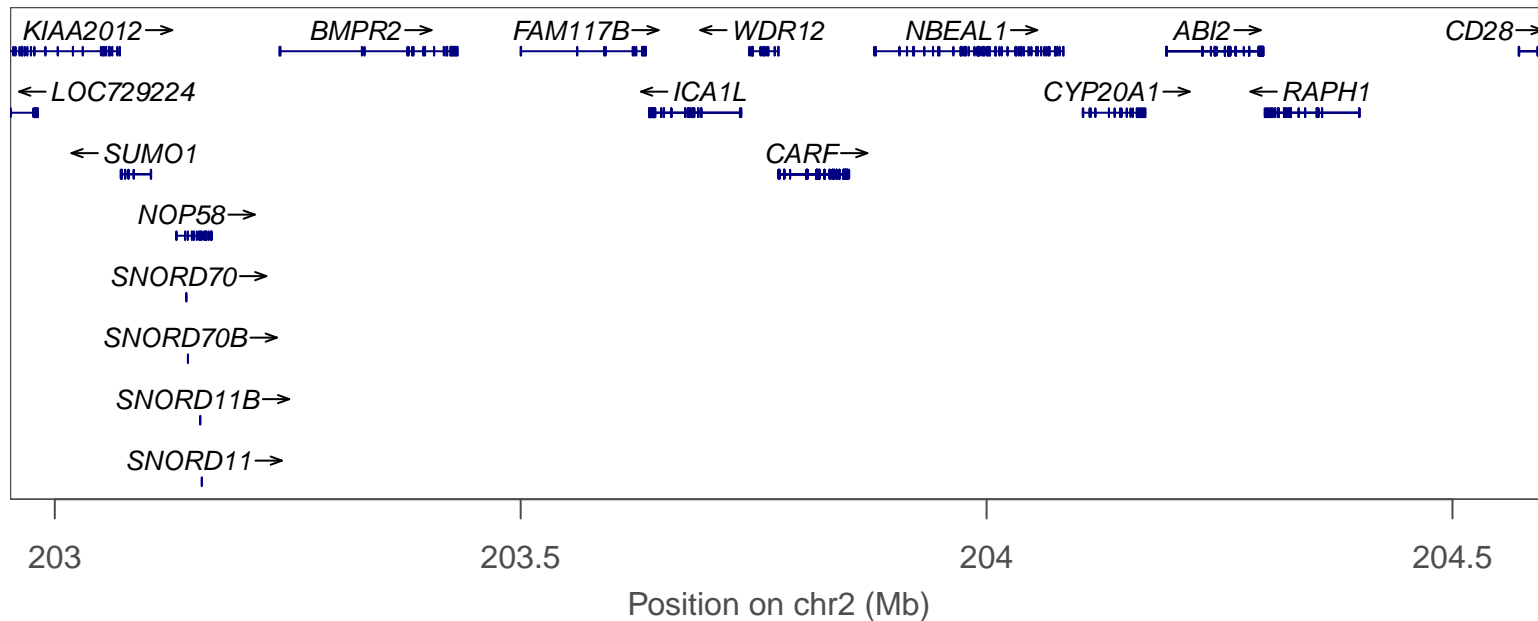

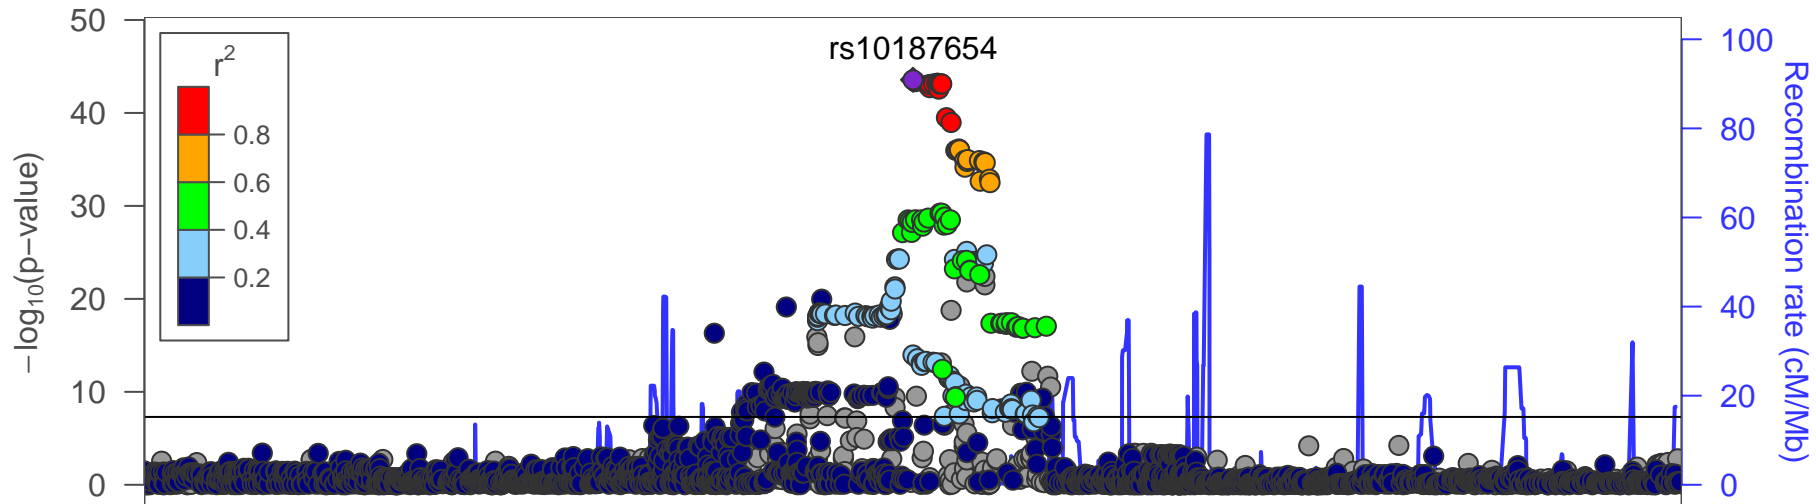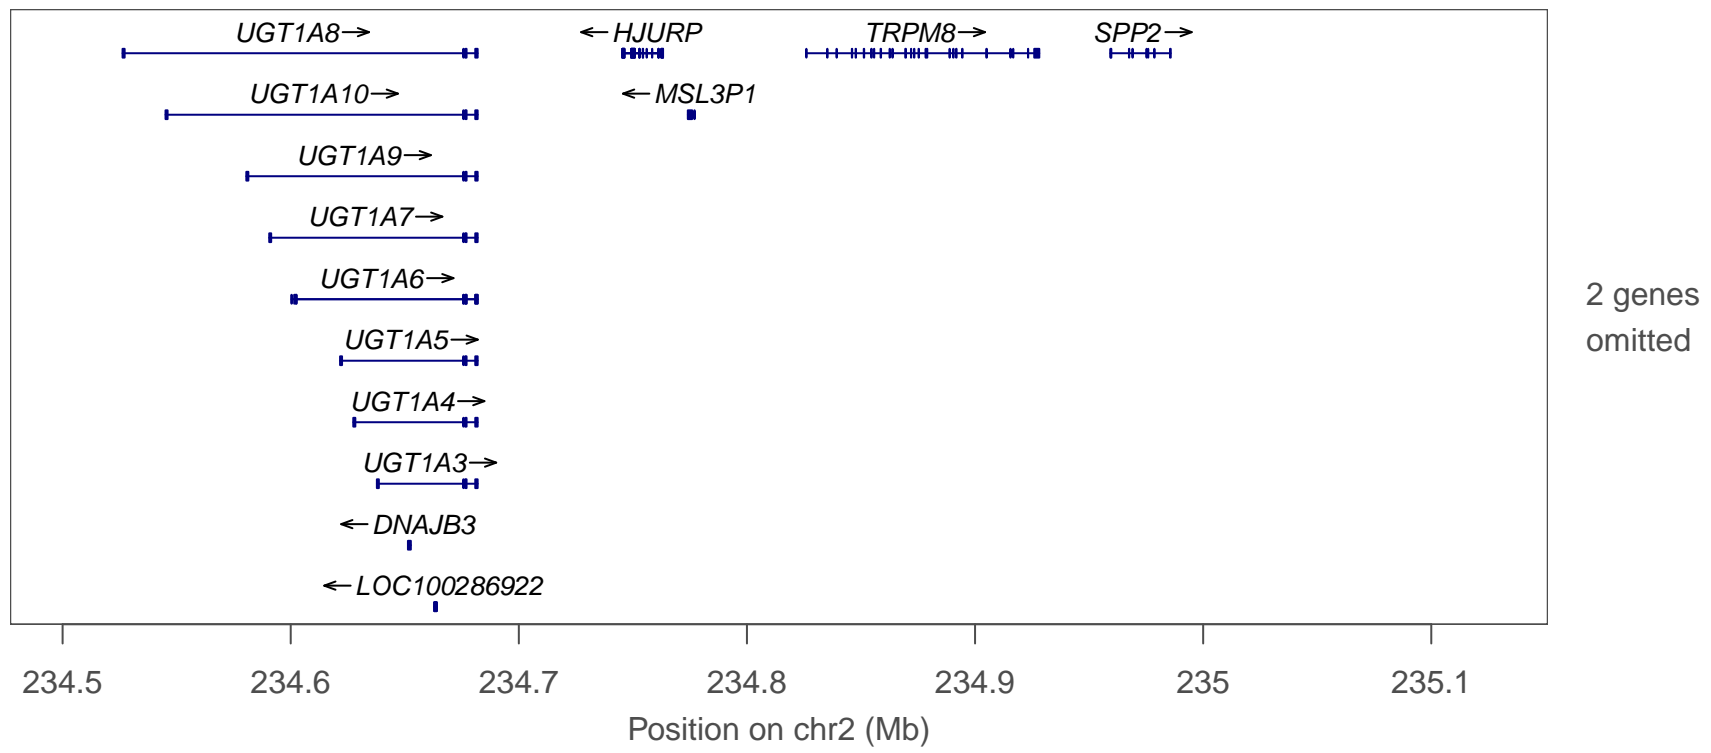

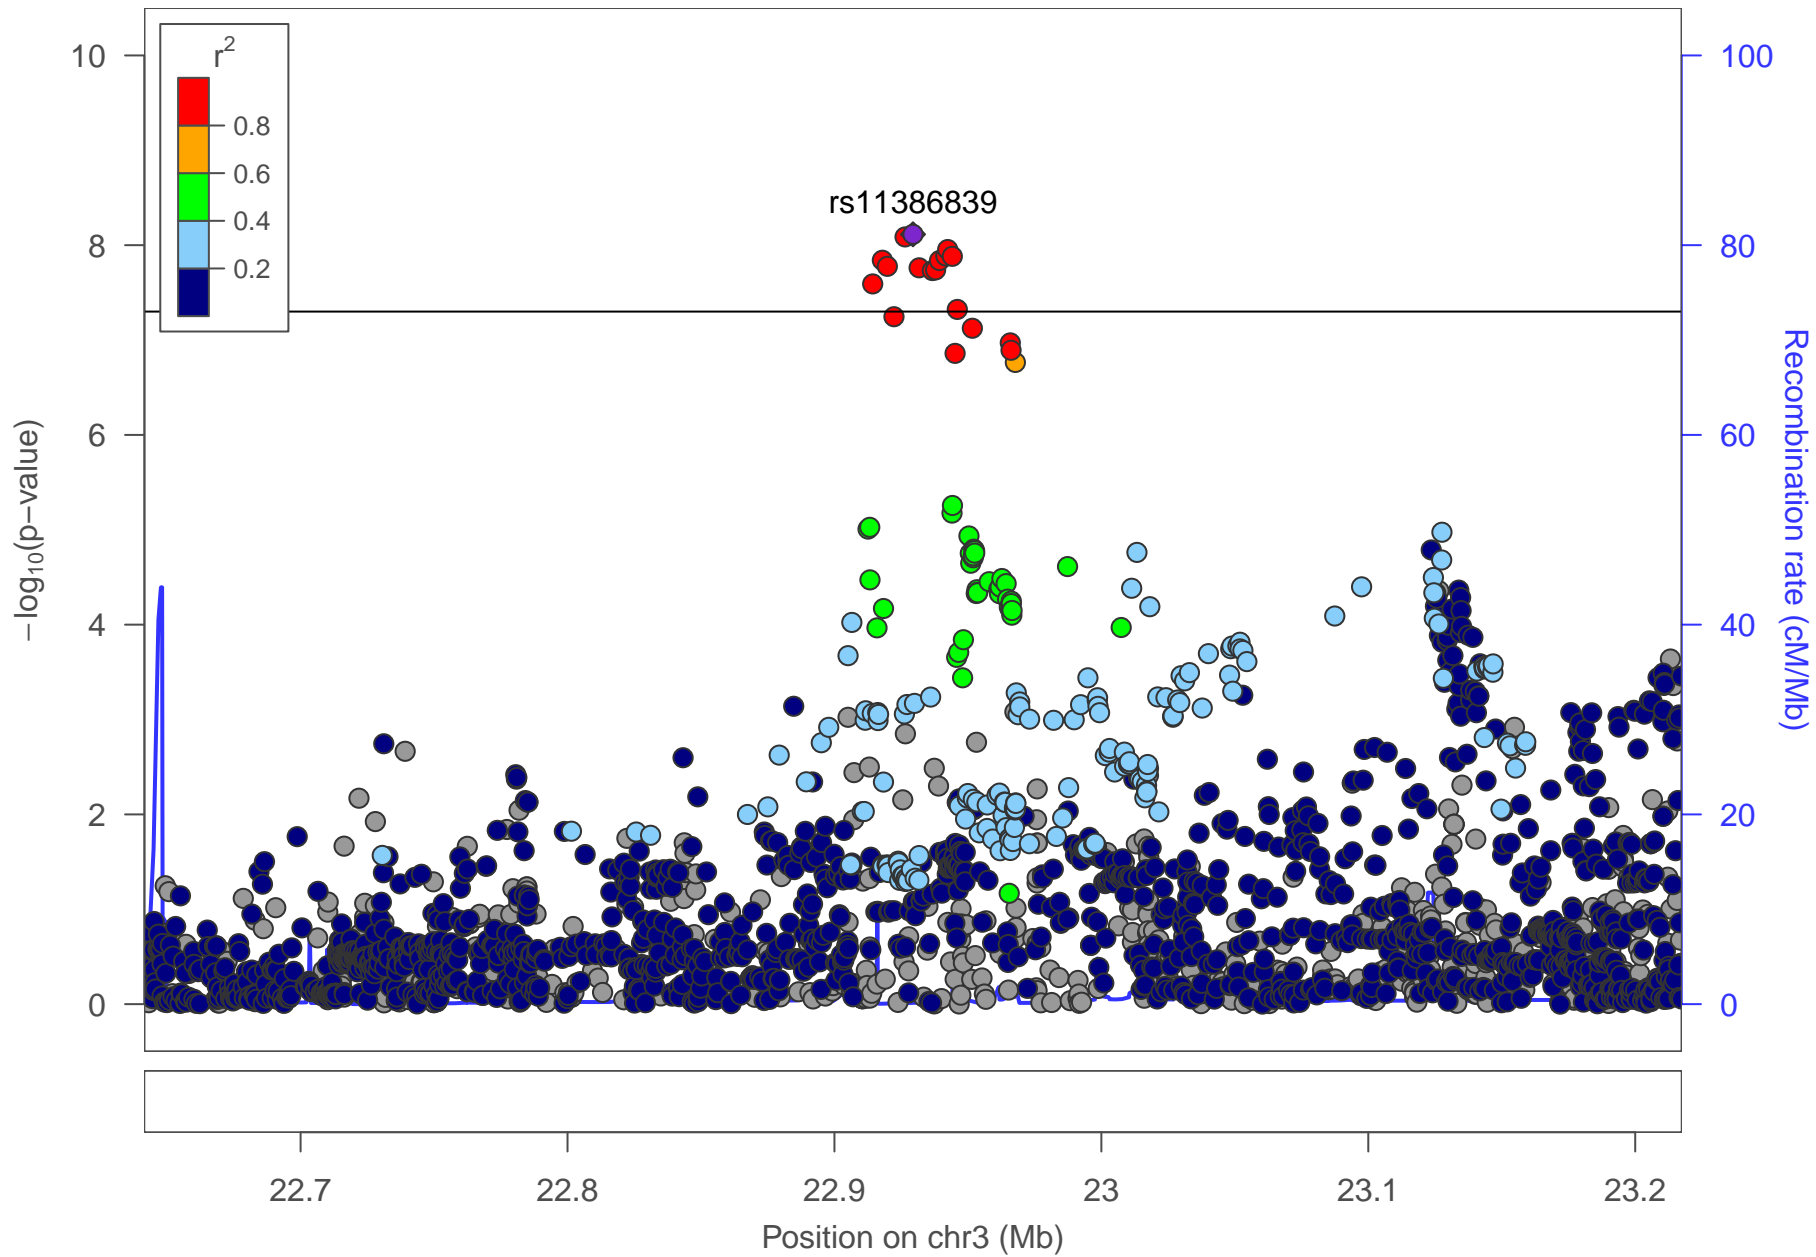



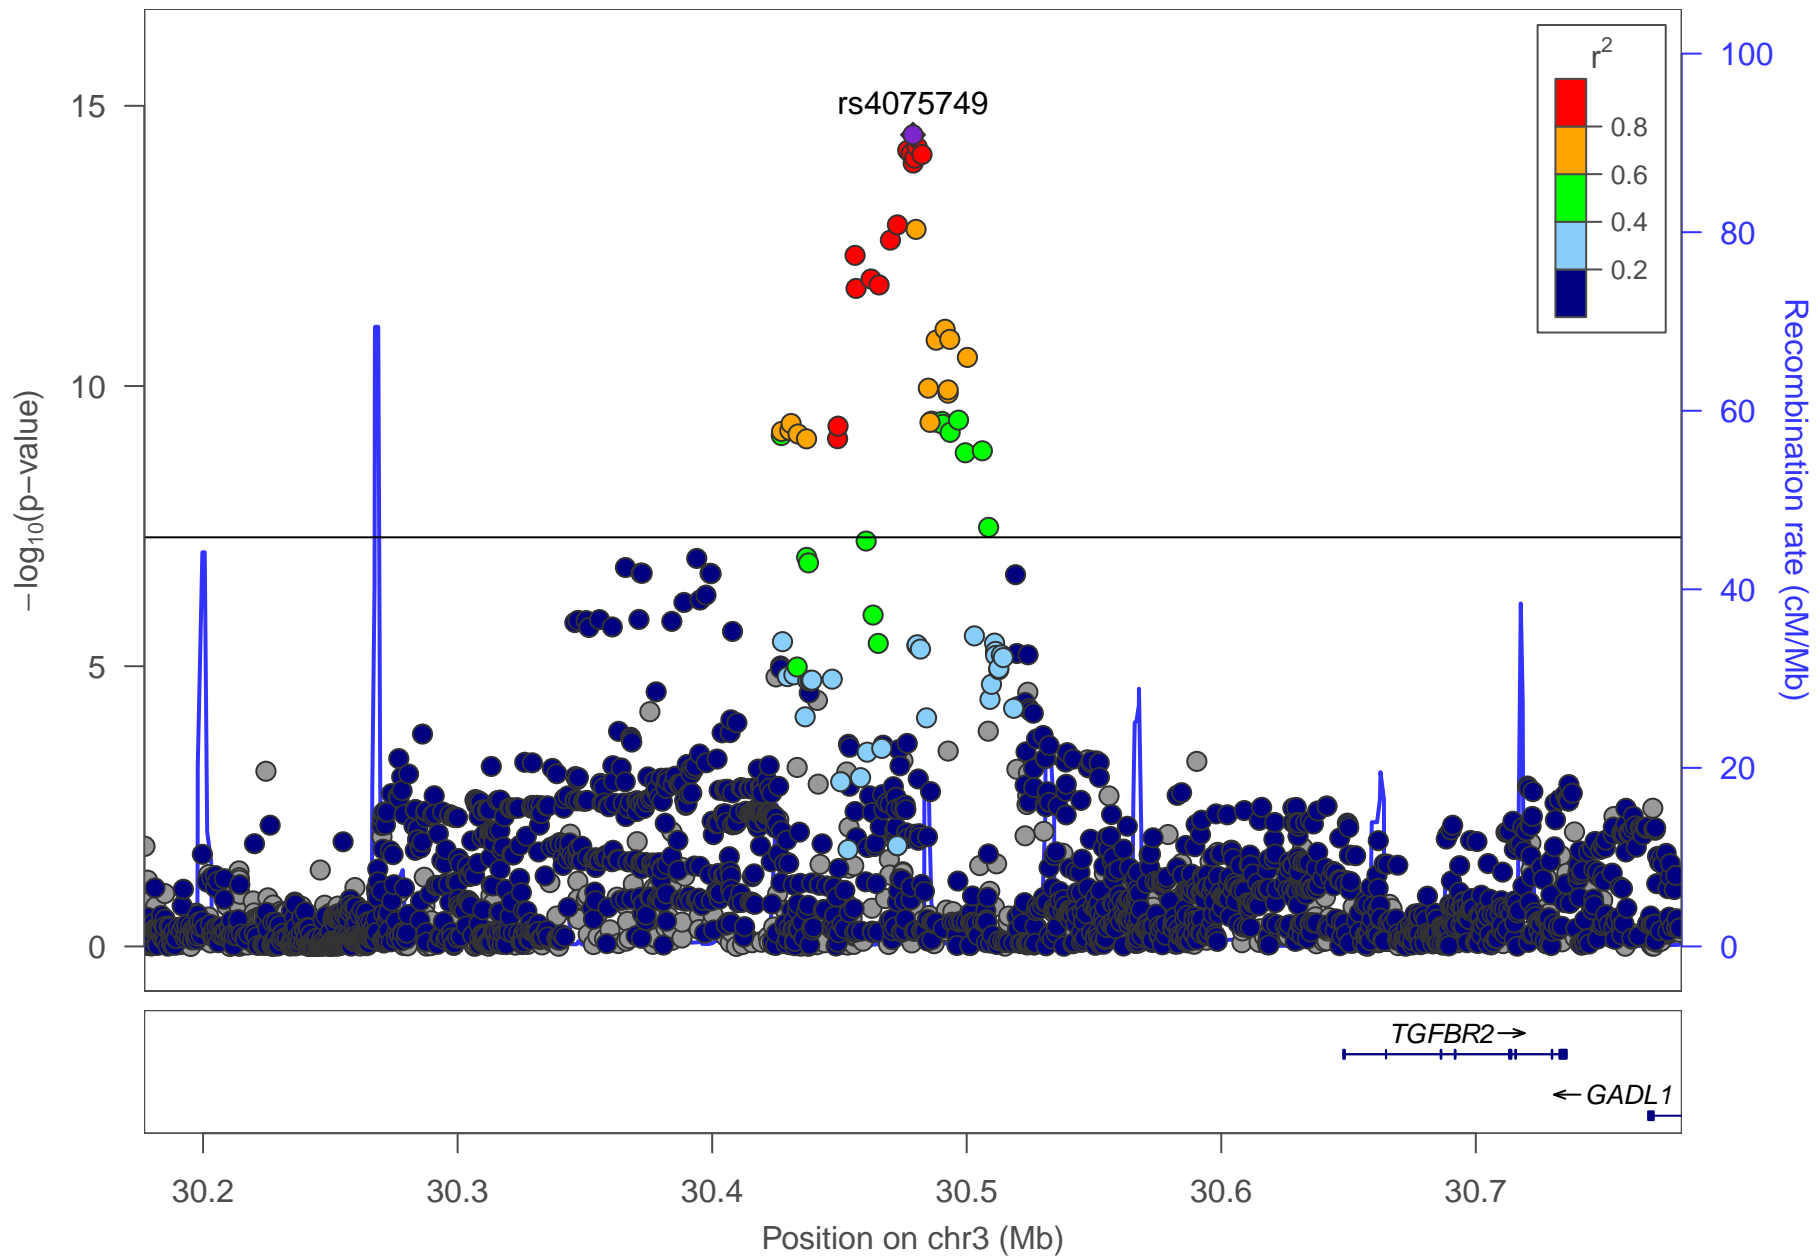

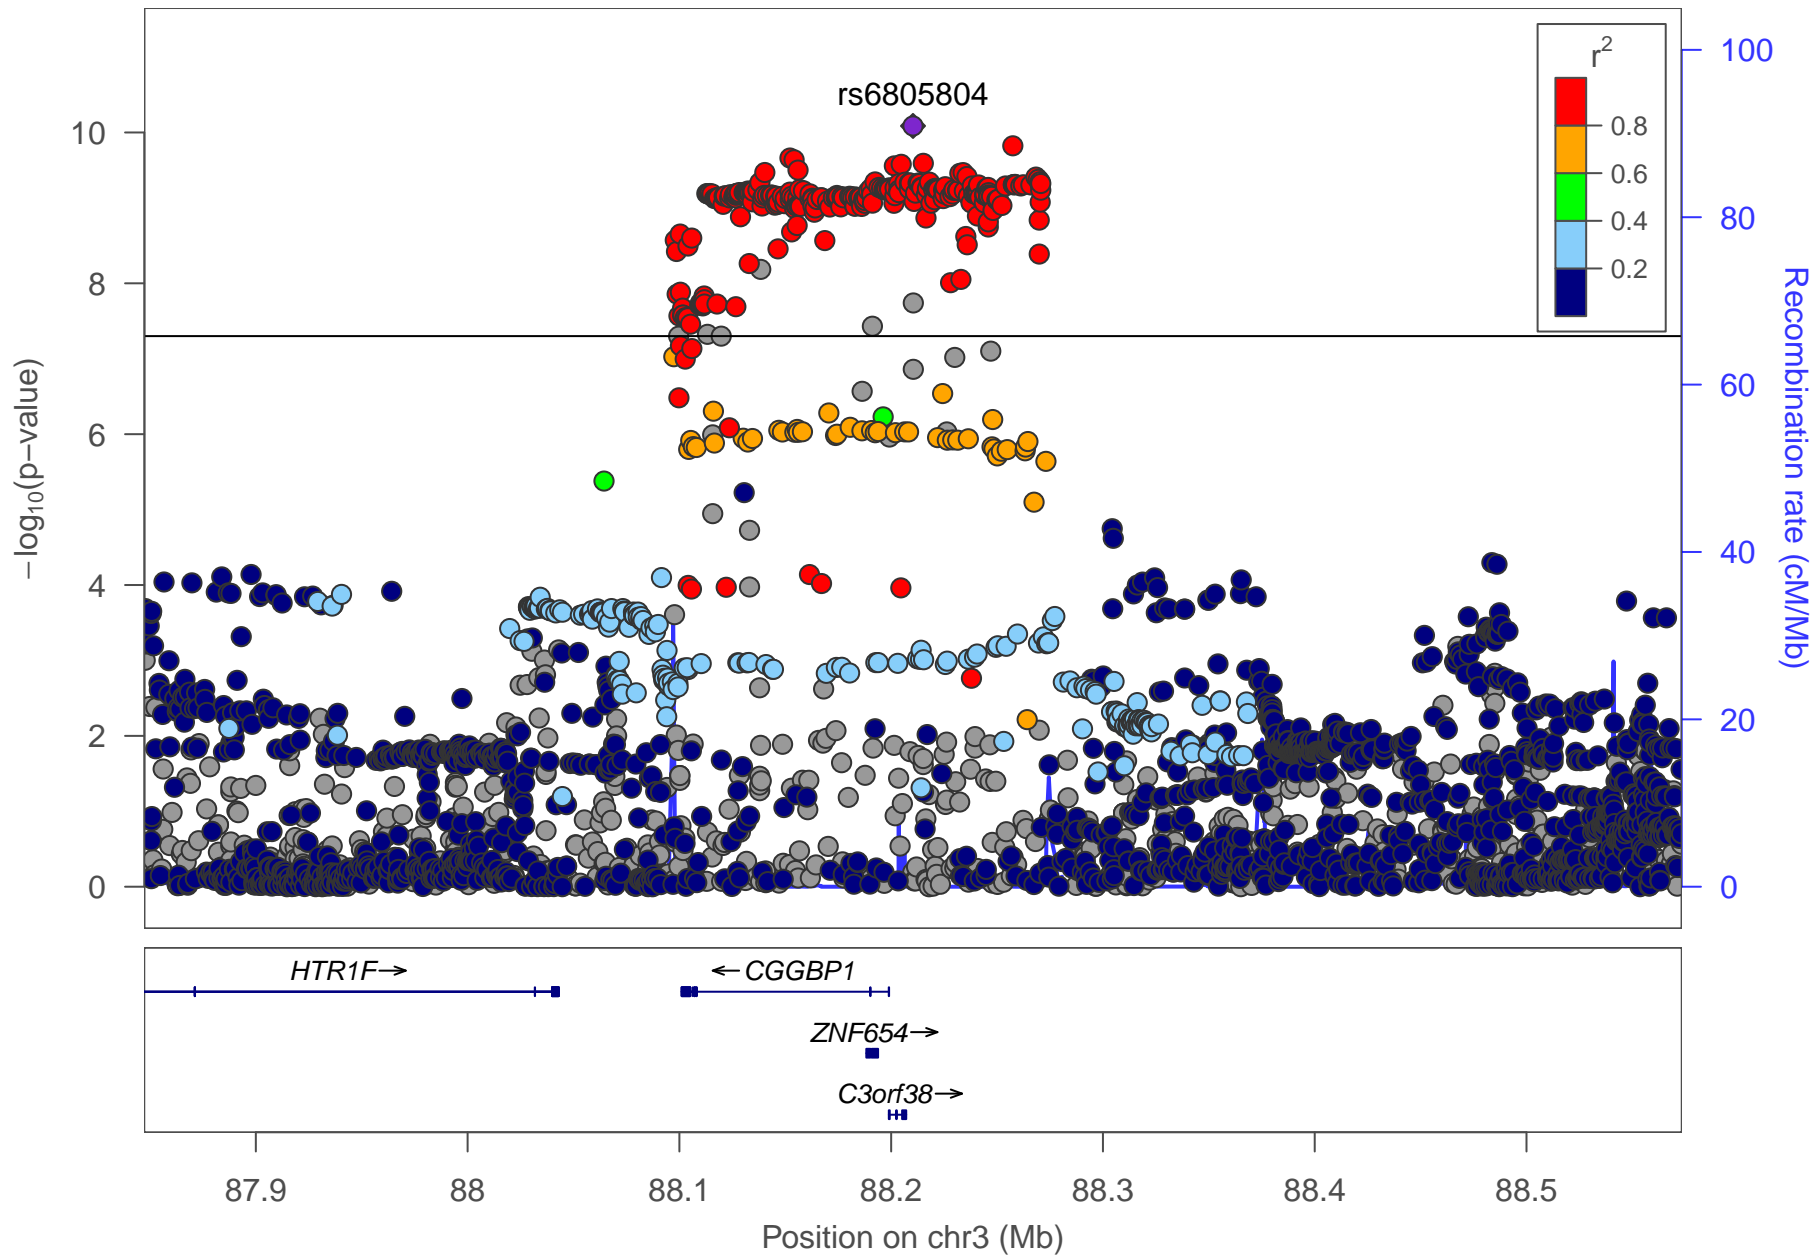

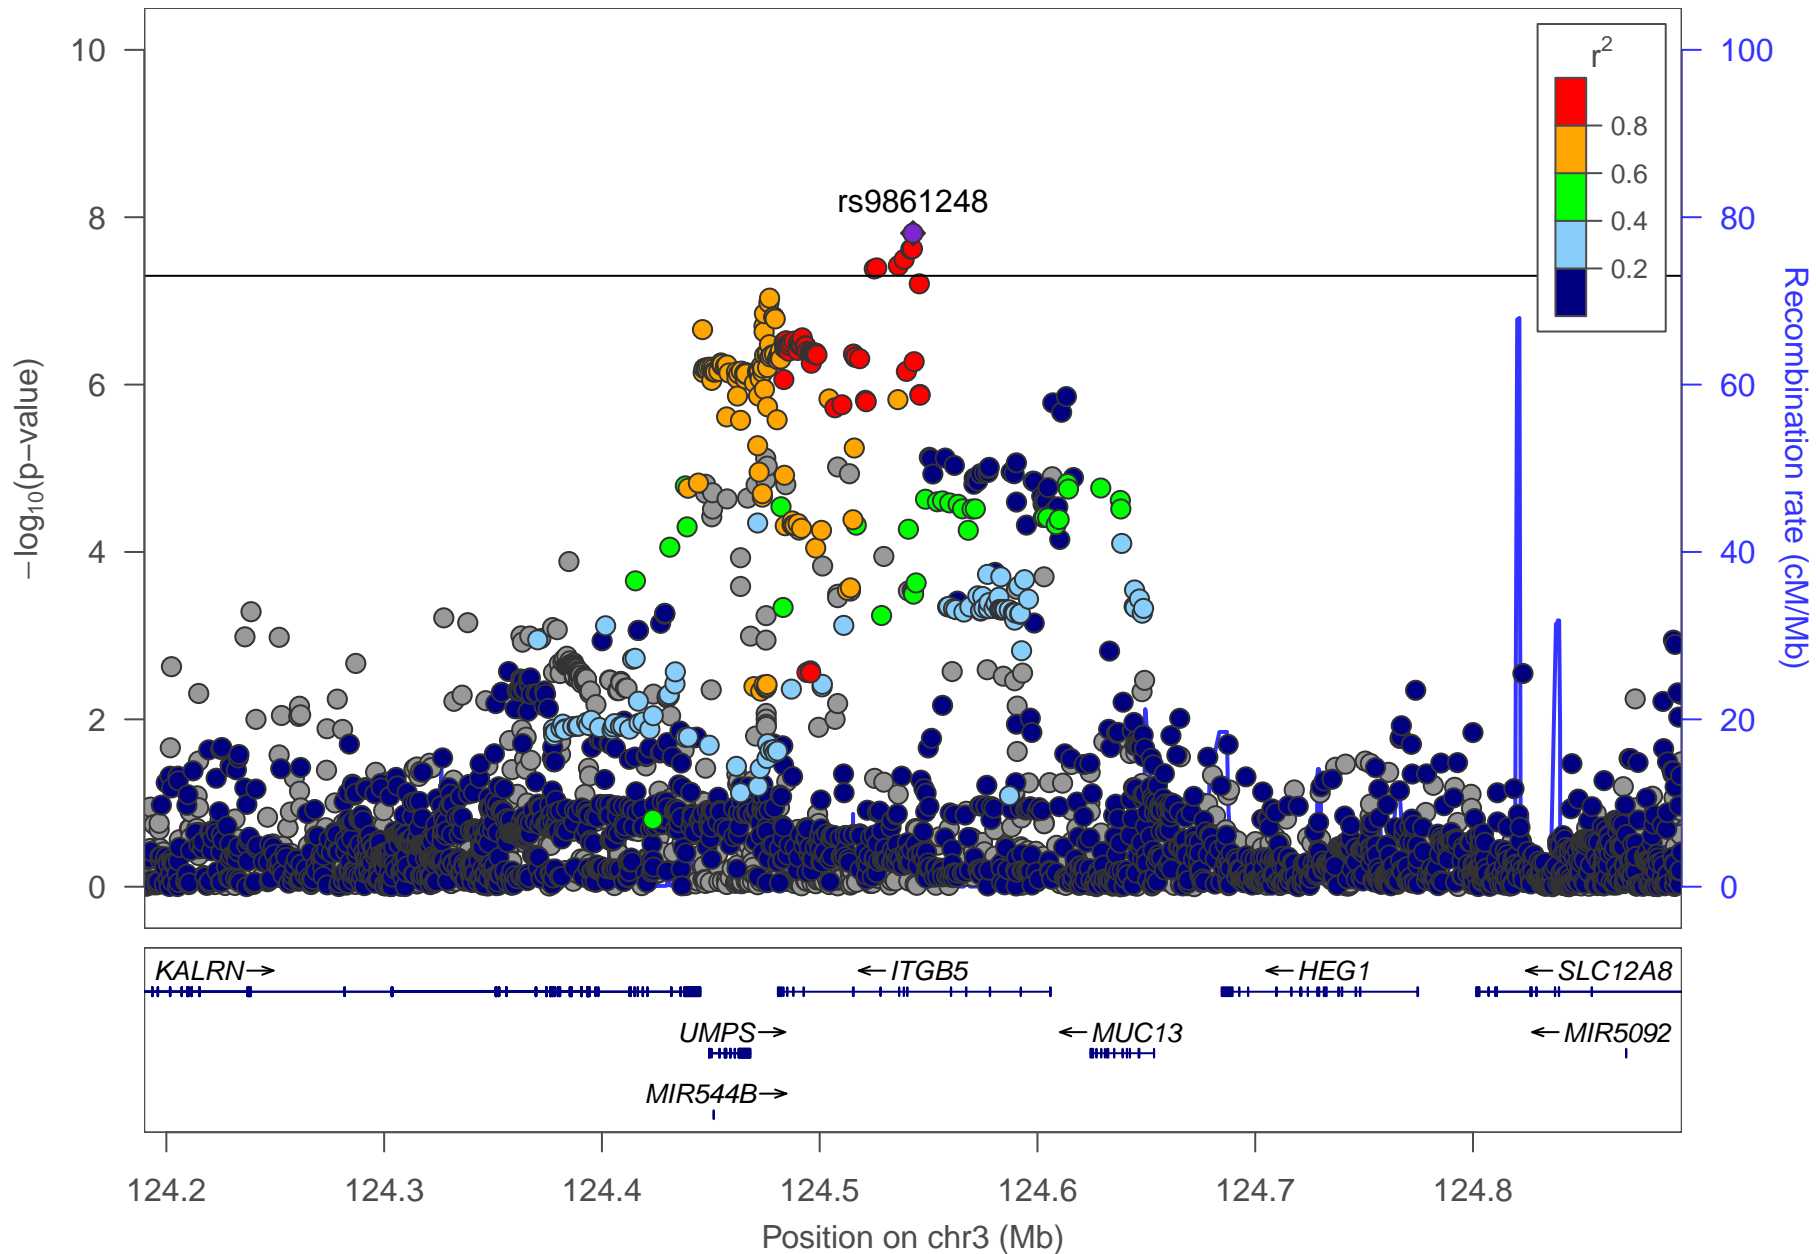

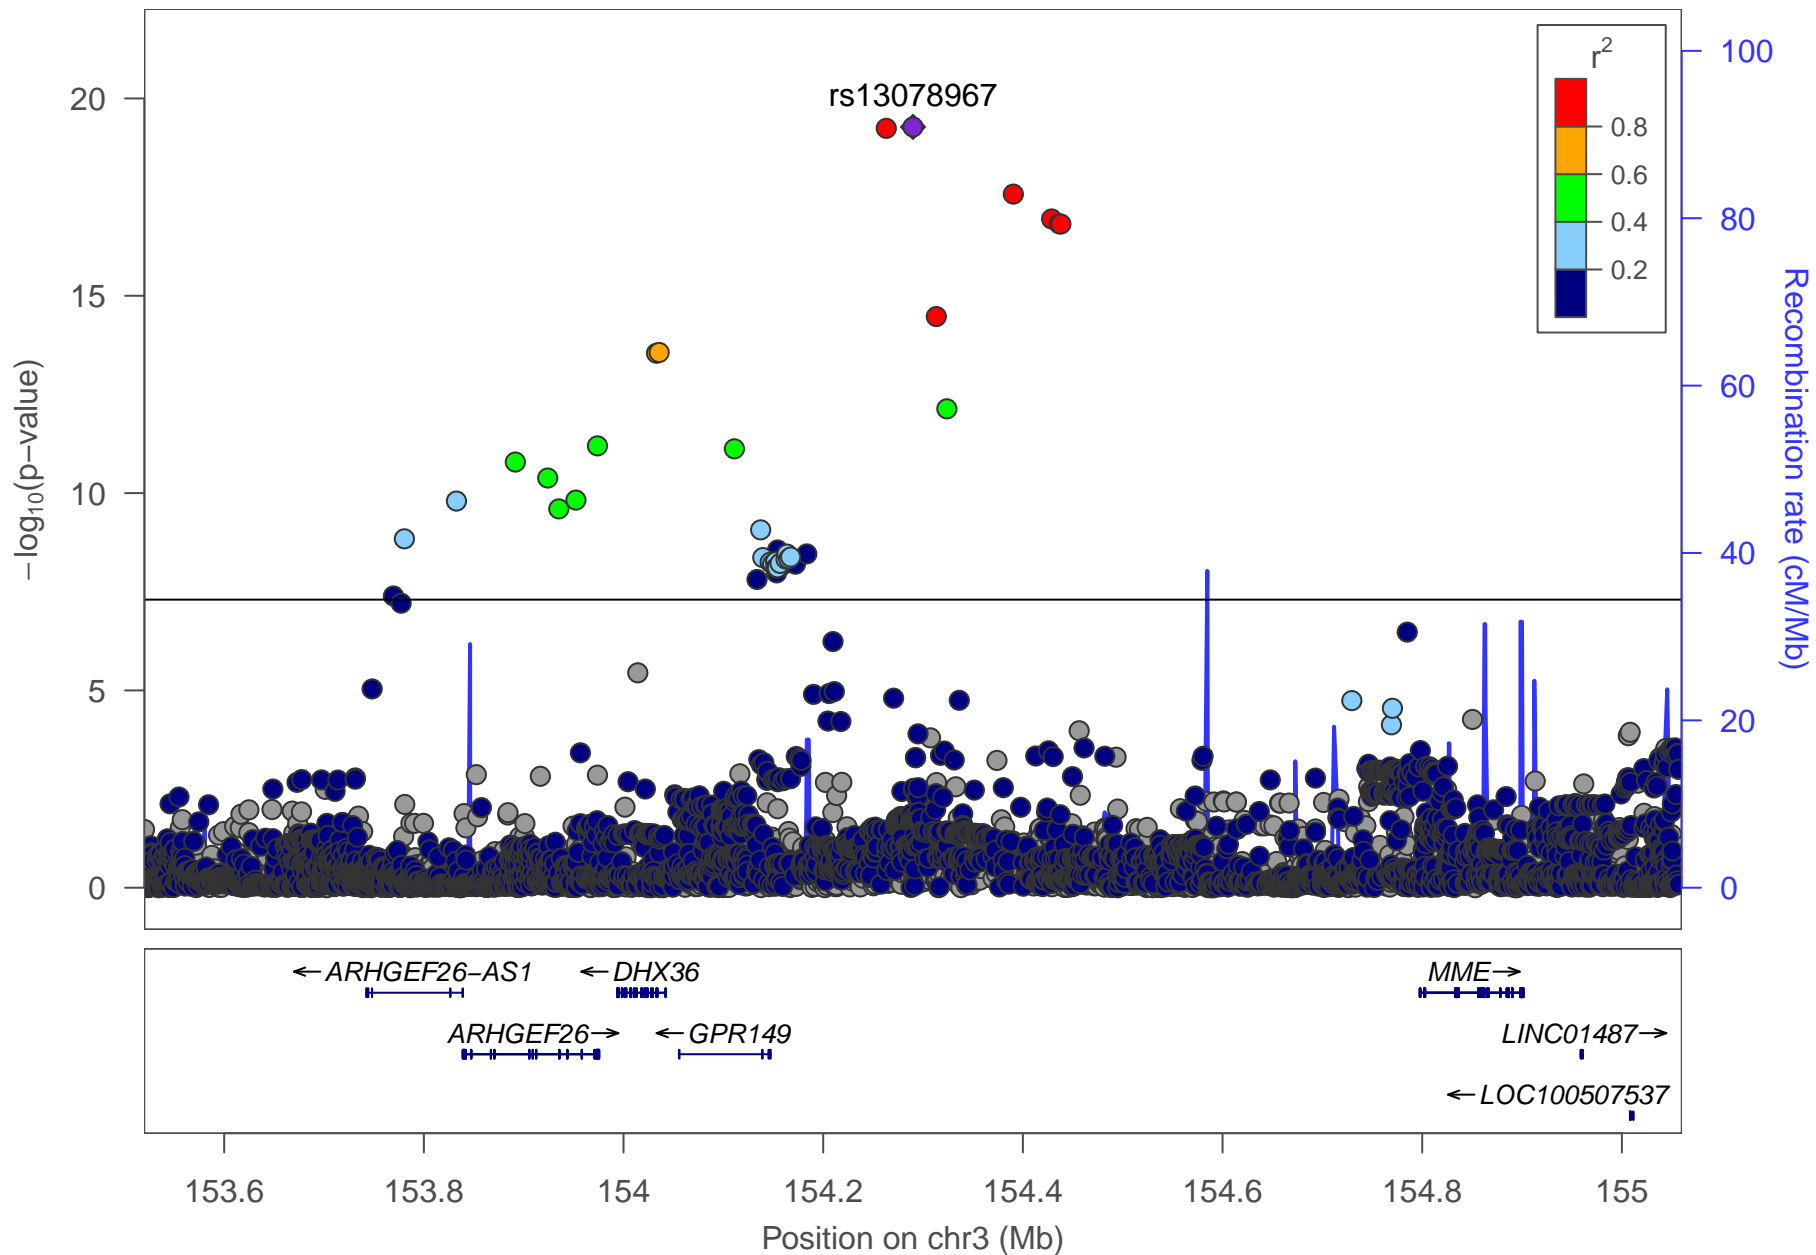

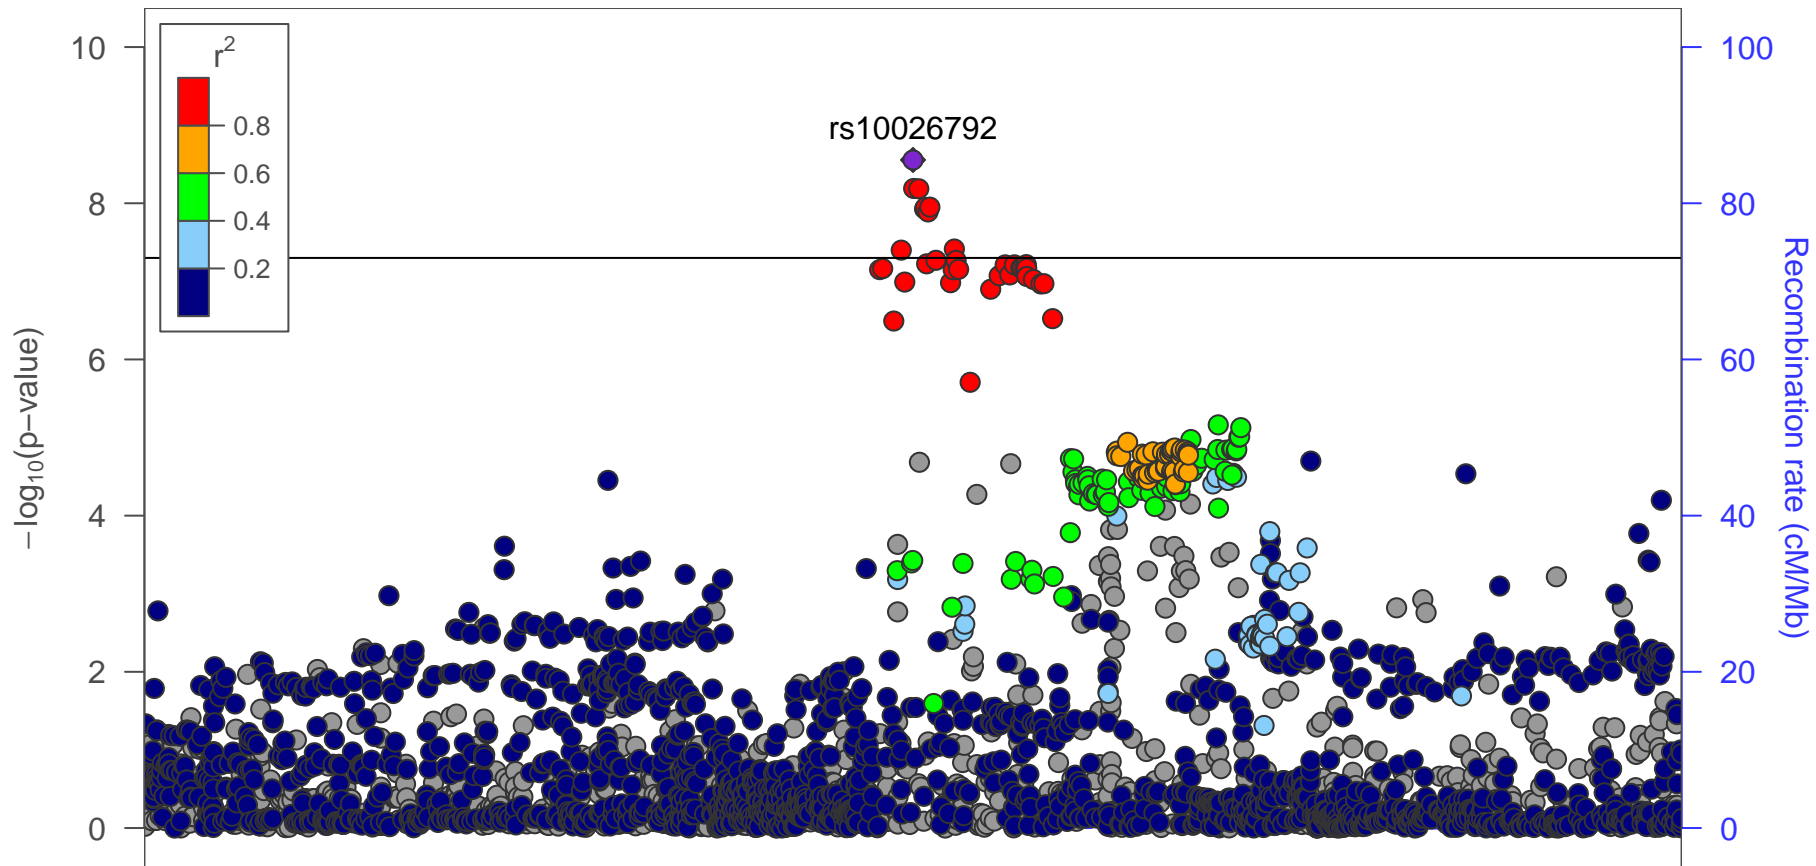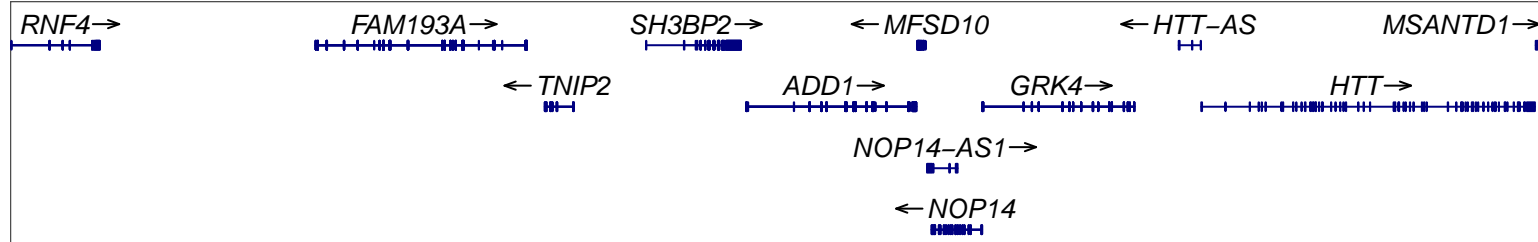

2.6

2.8

3

3.2

Position on chr4 (Mb)

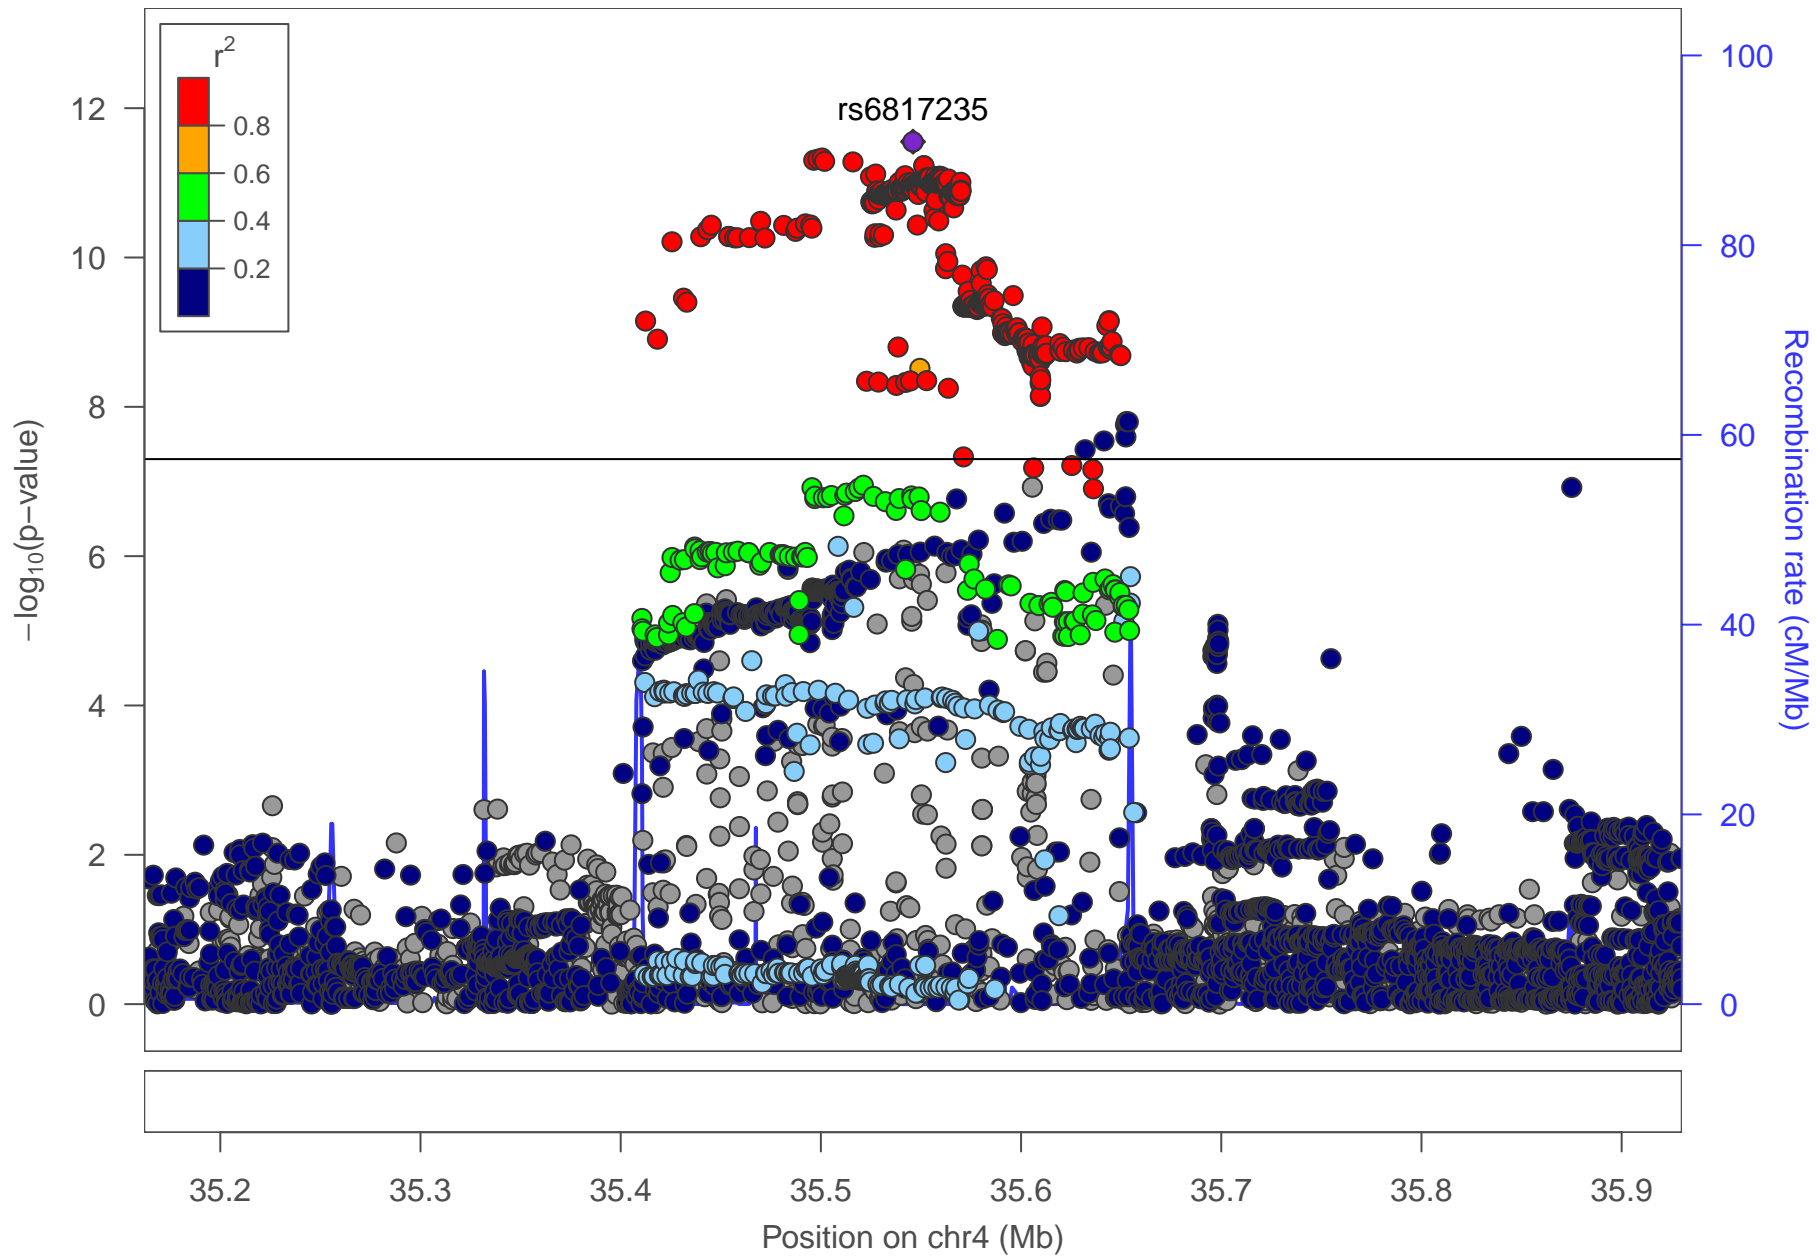

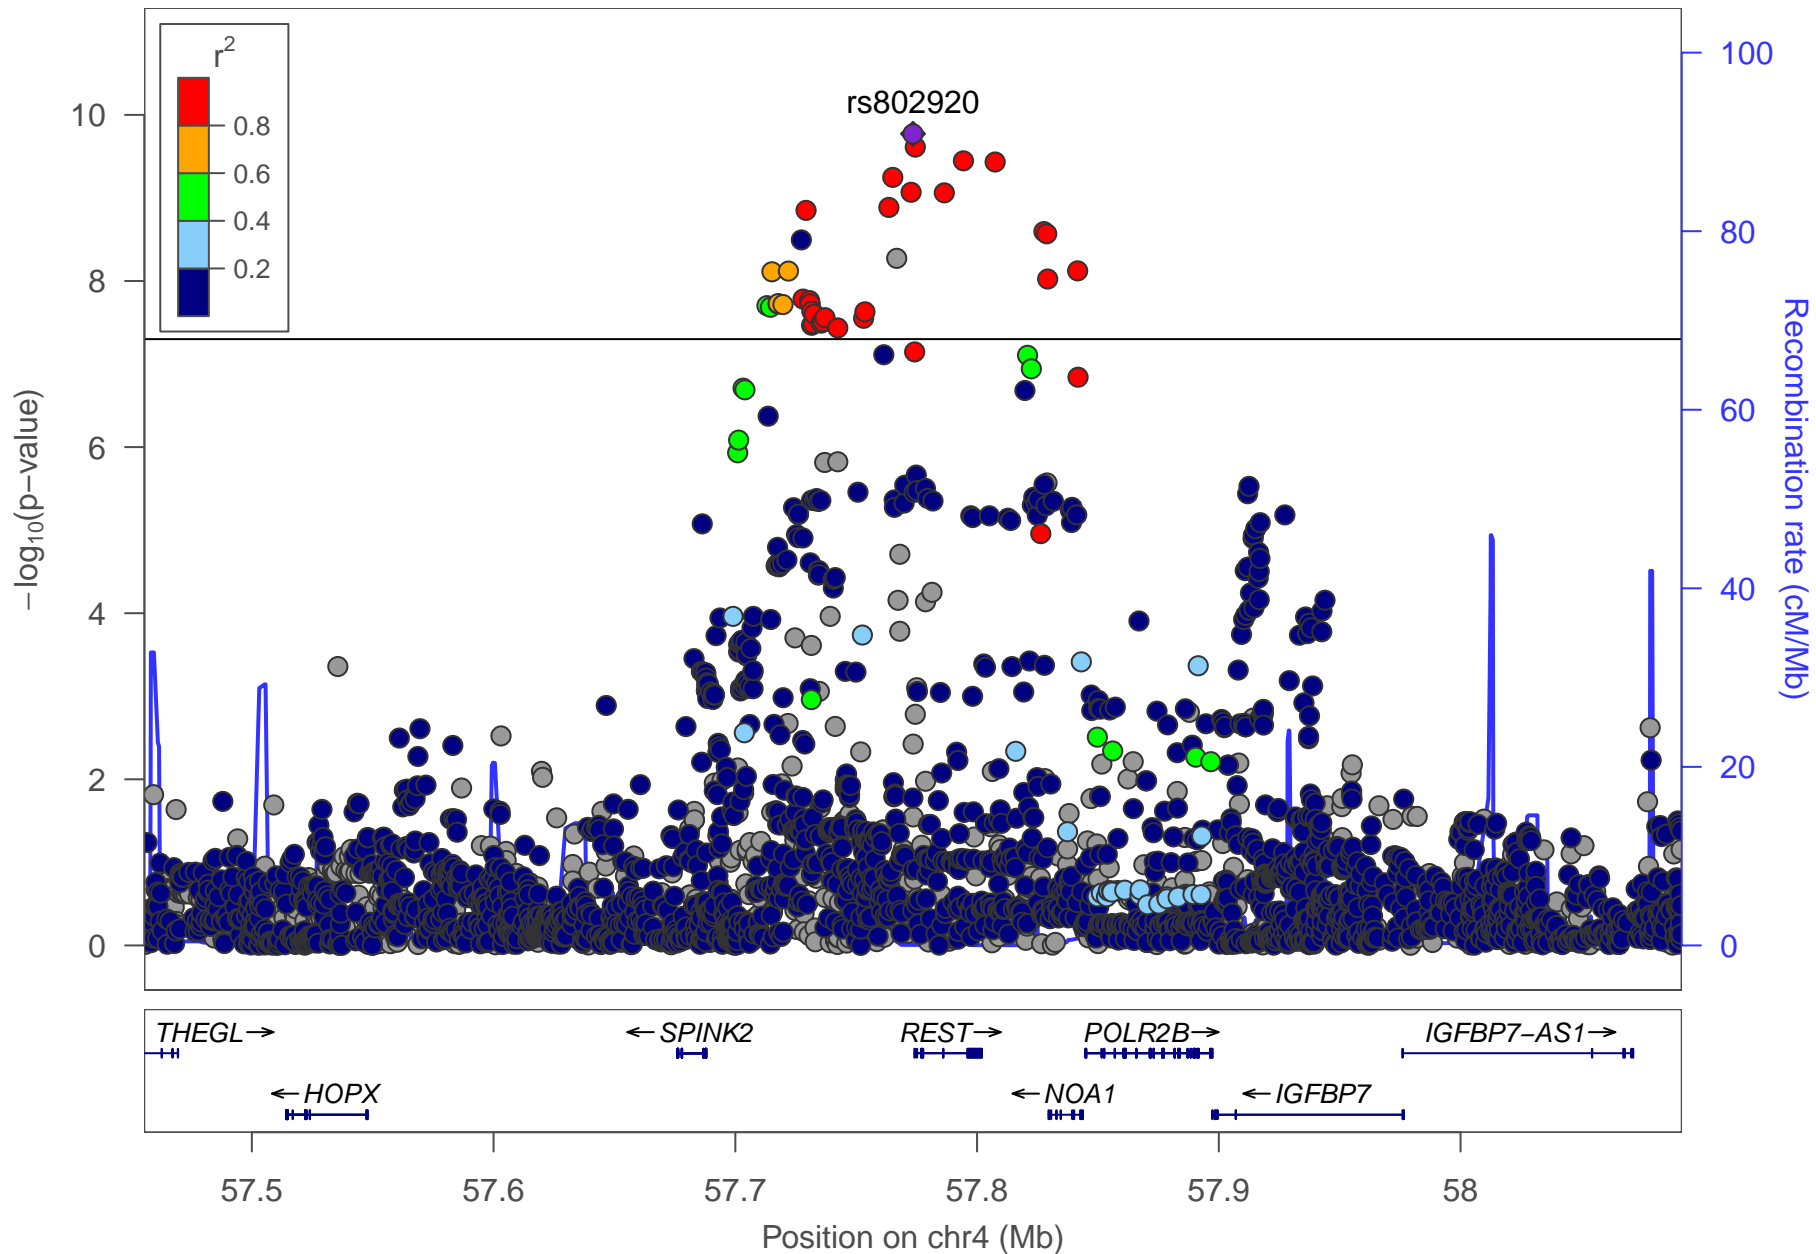



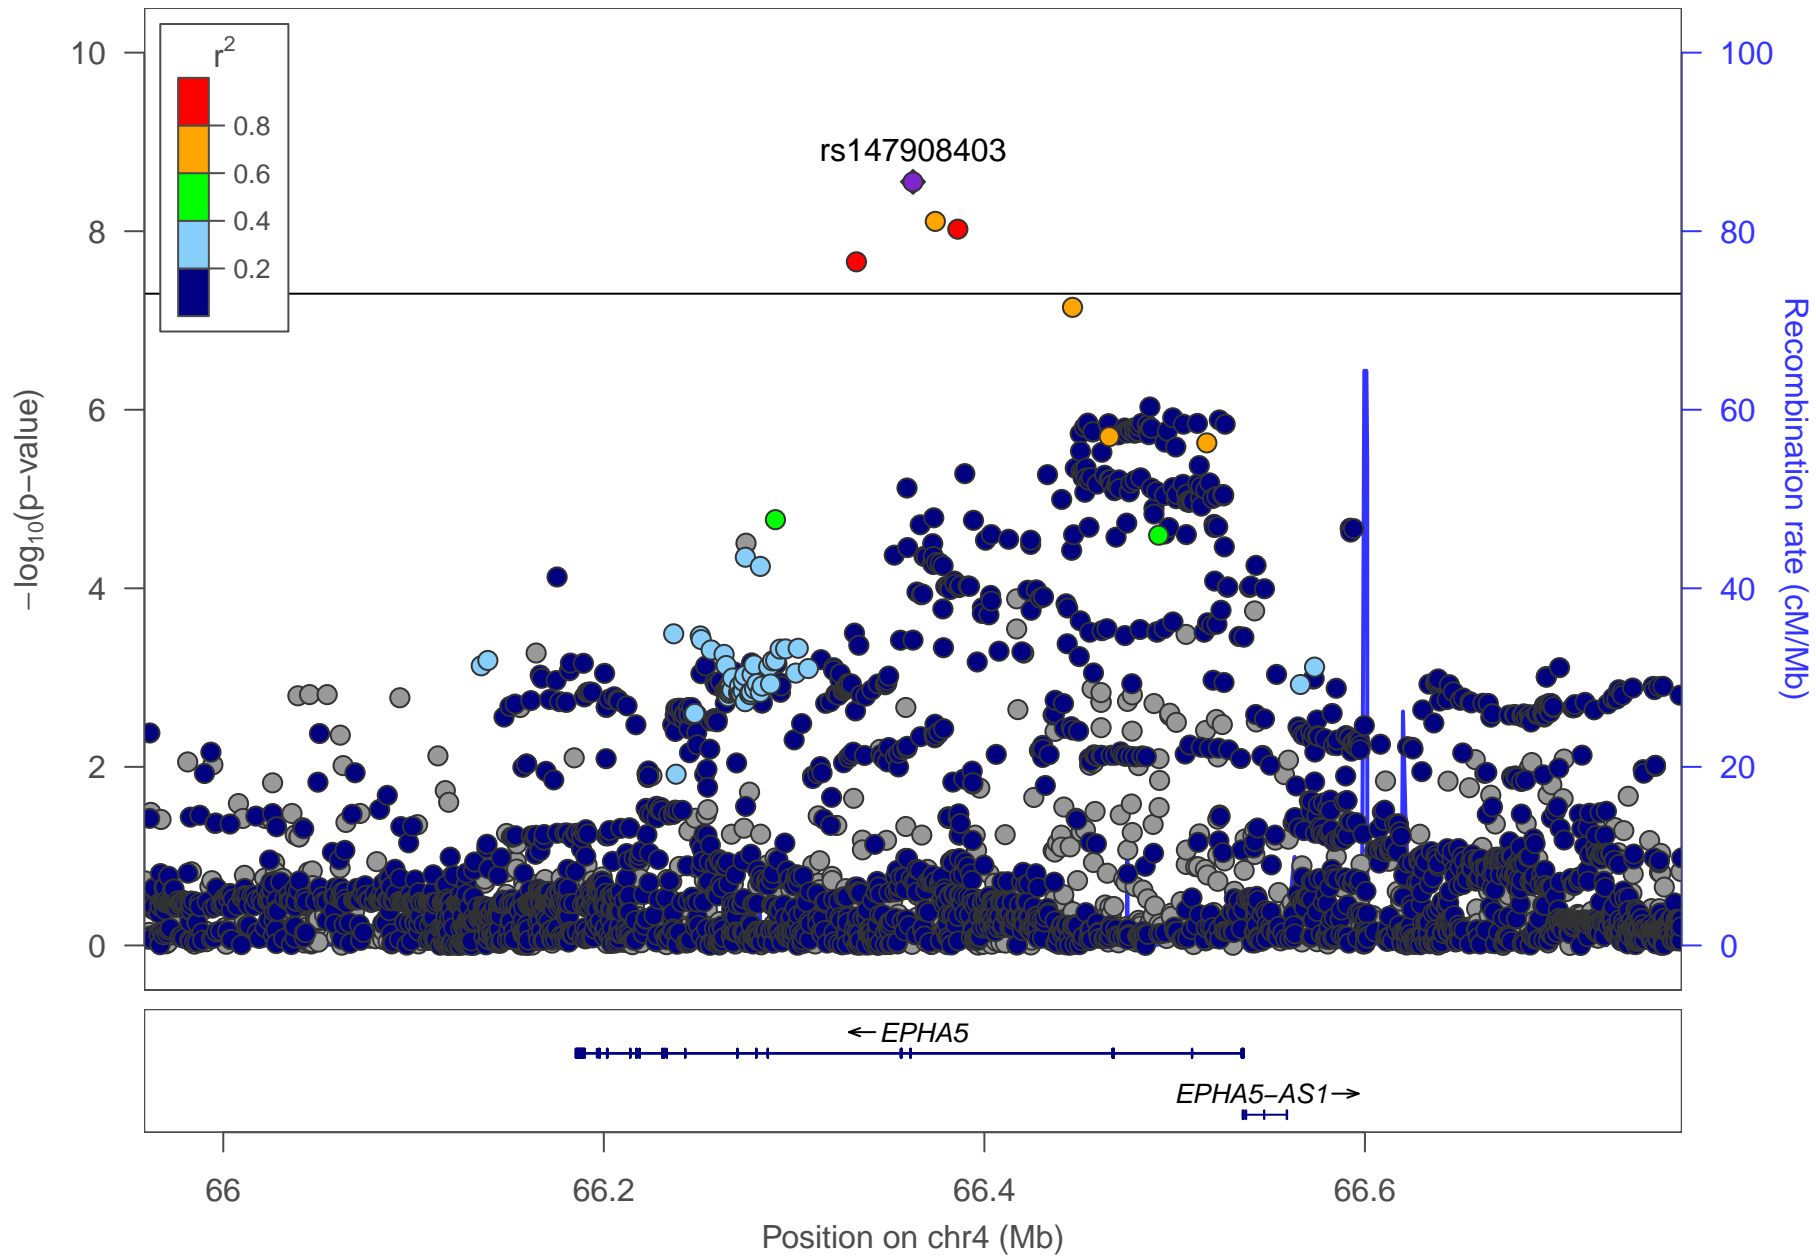



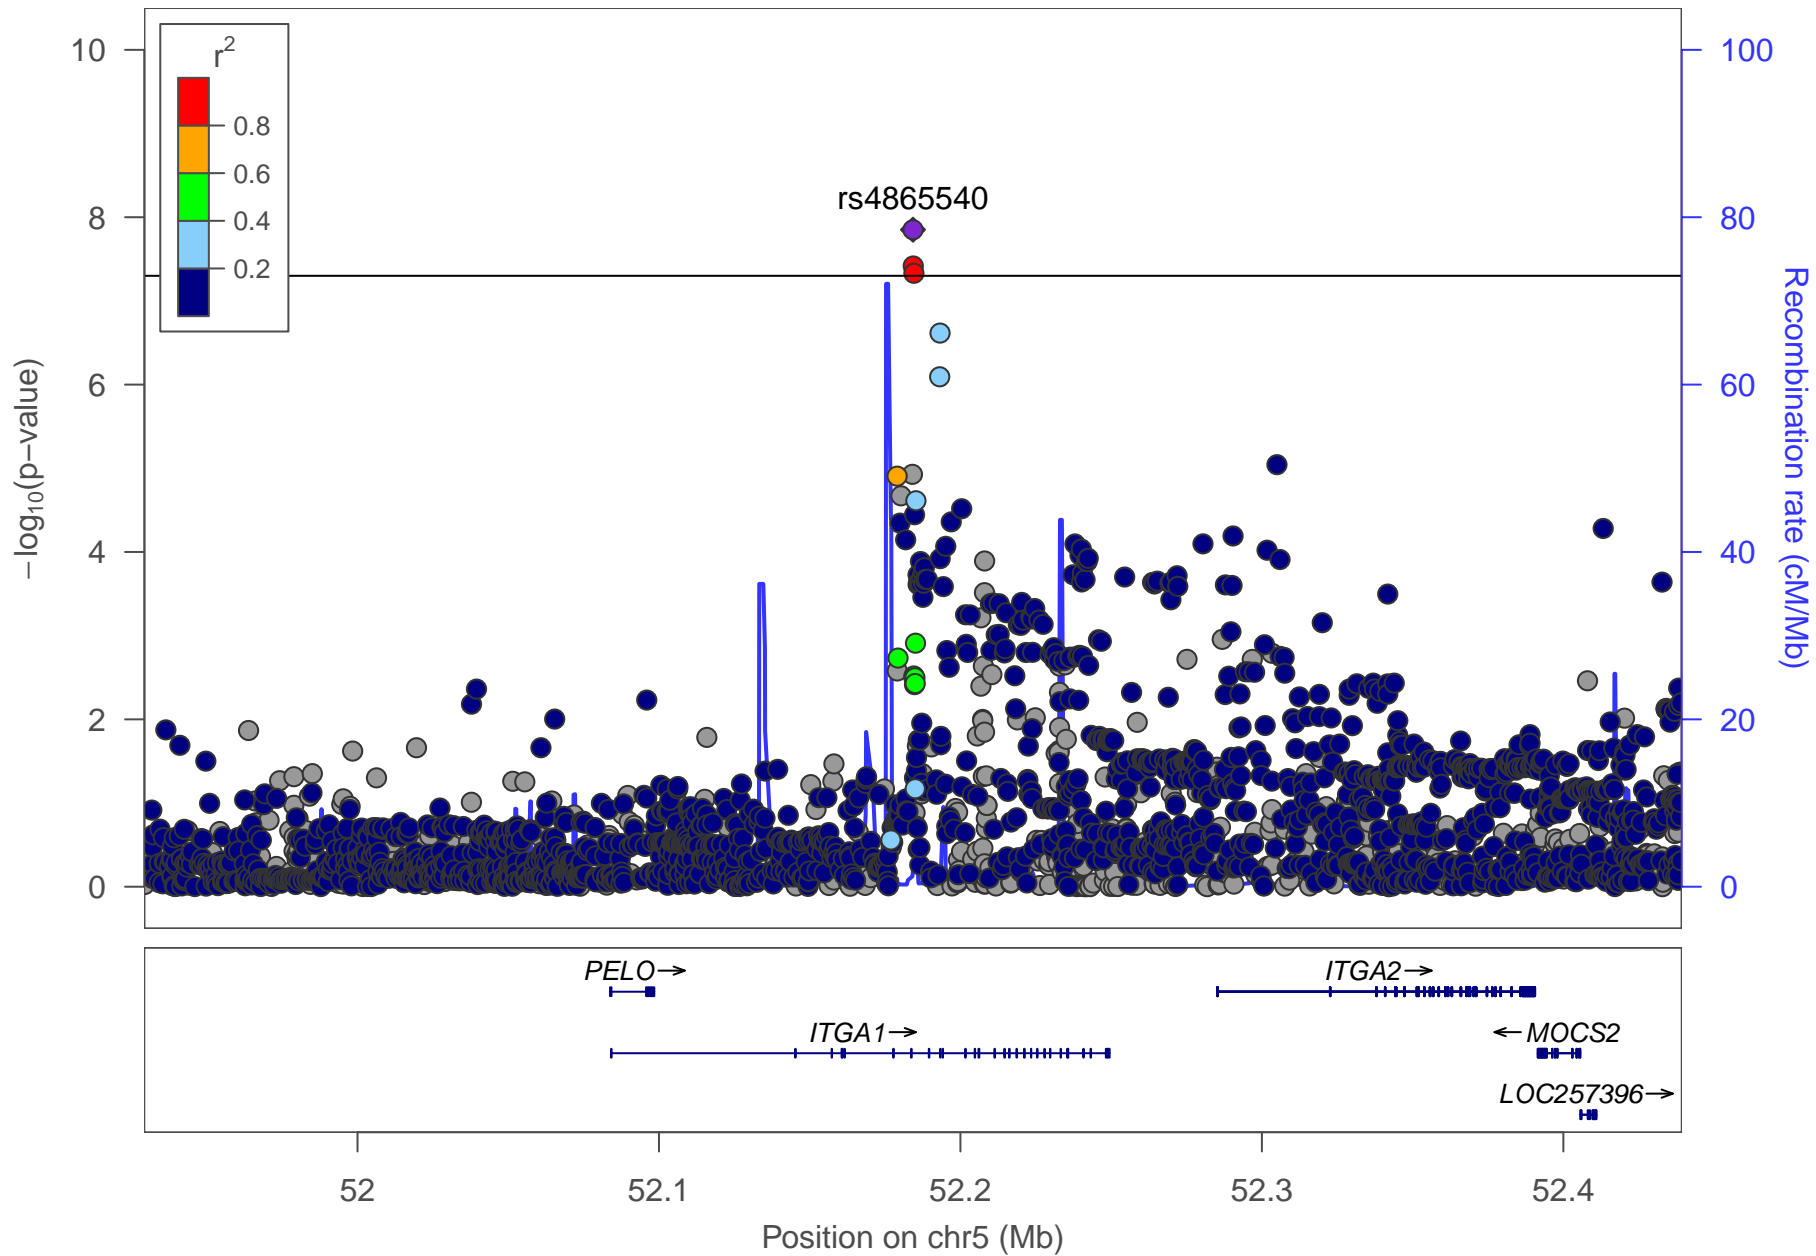

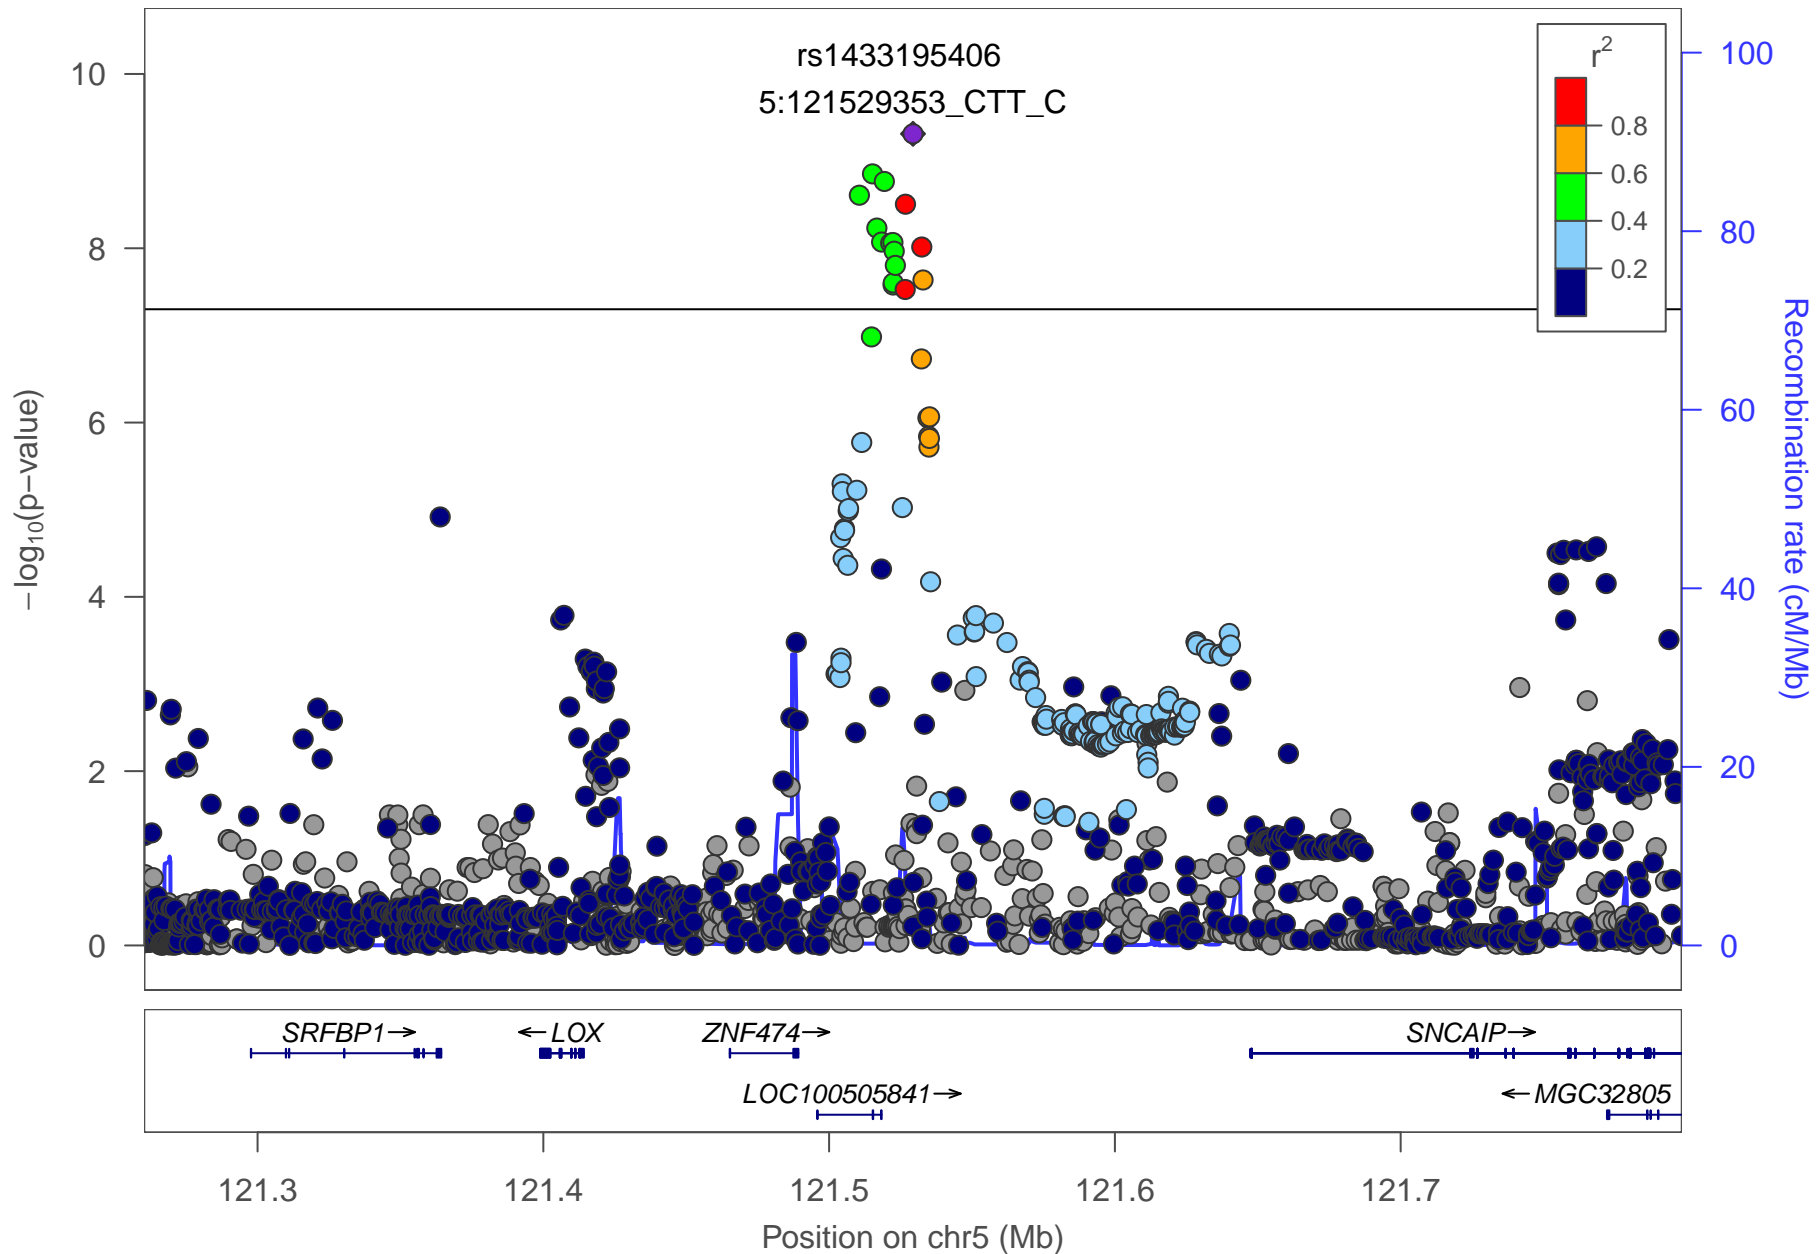

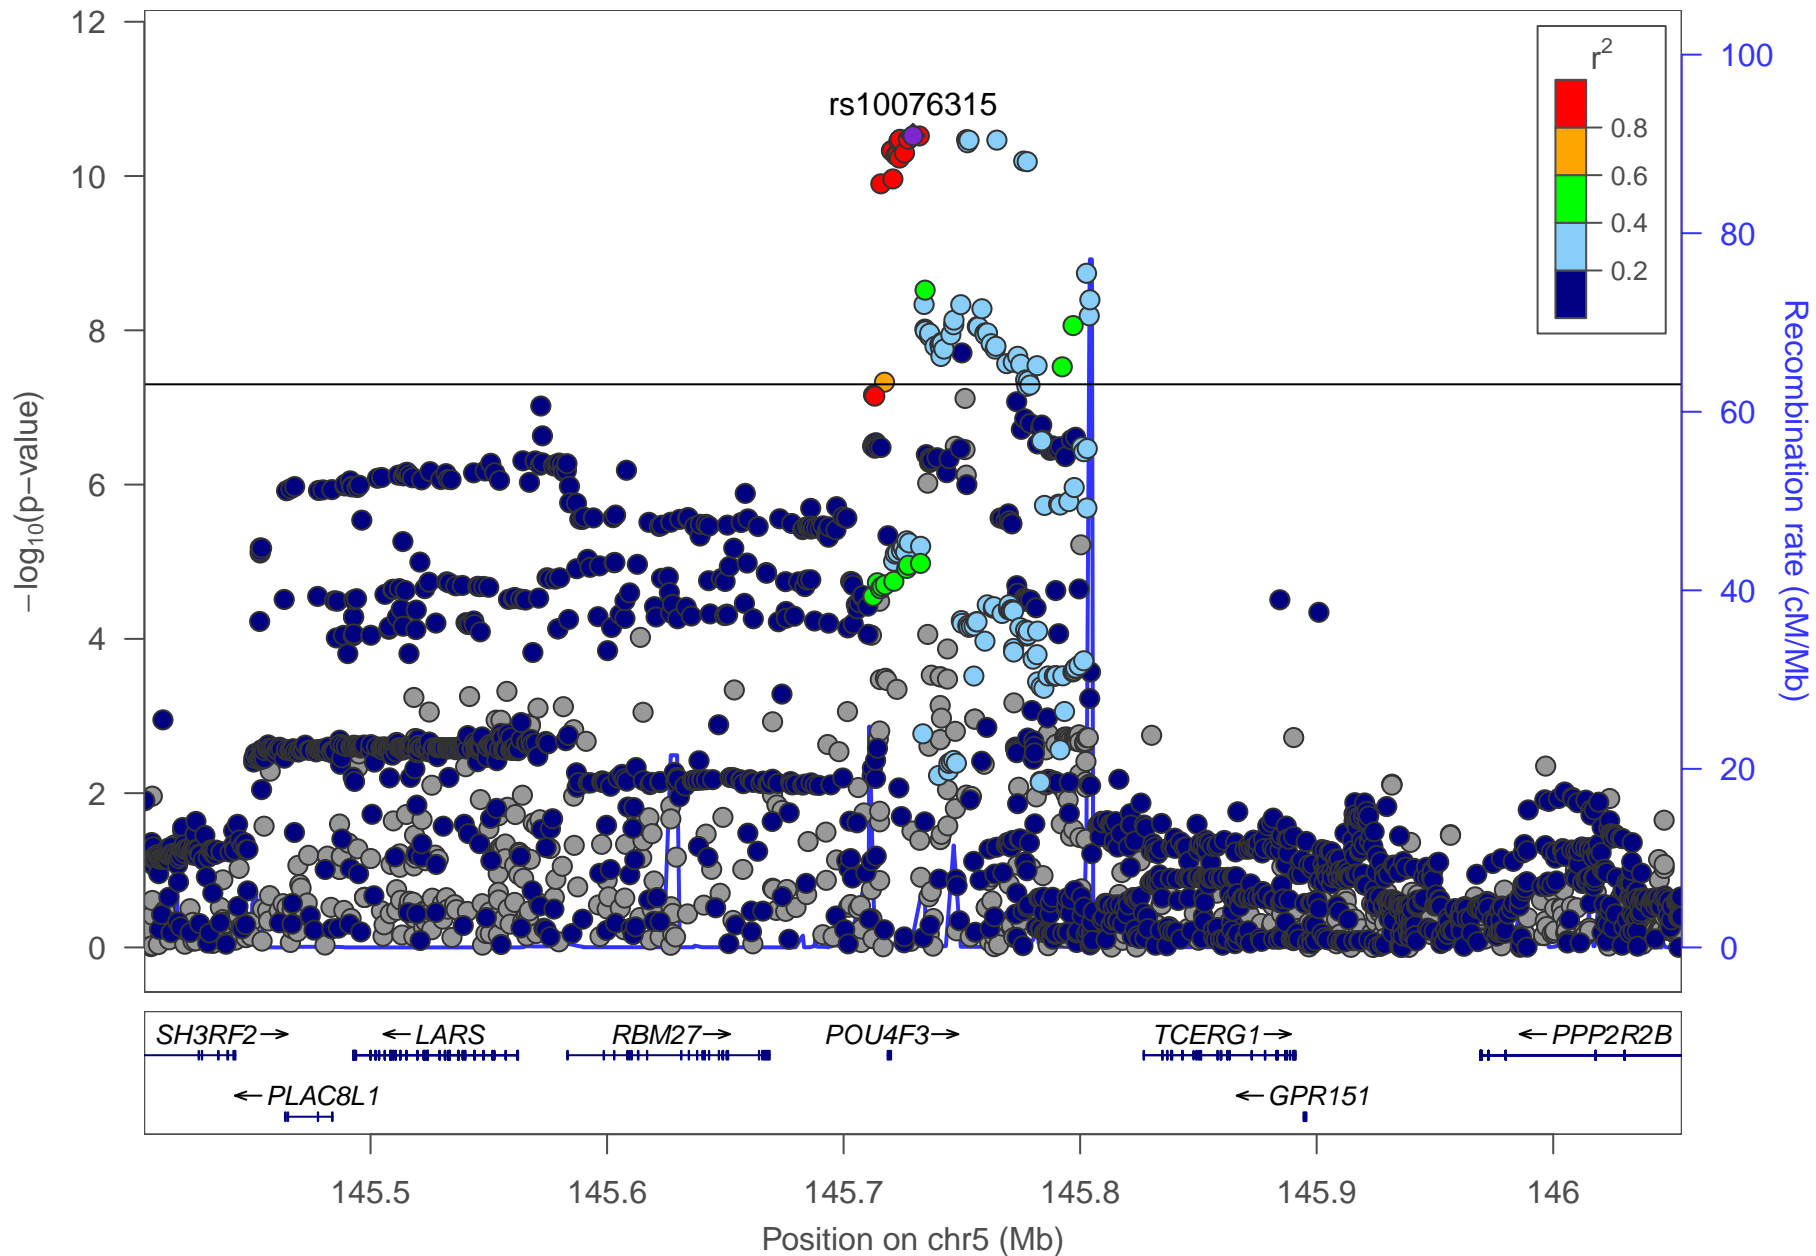

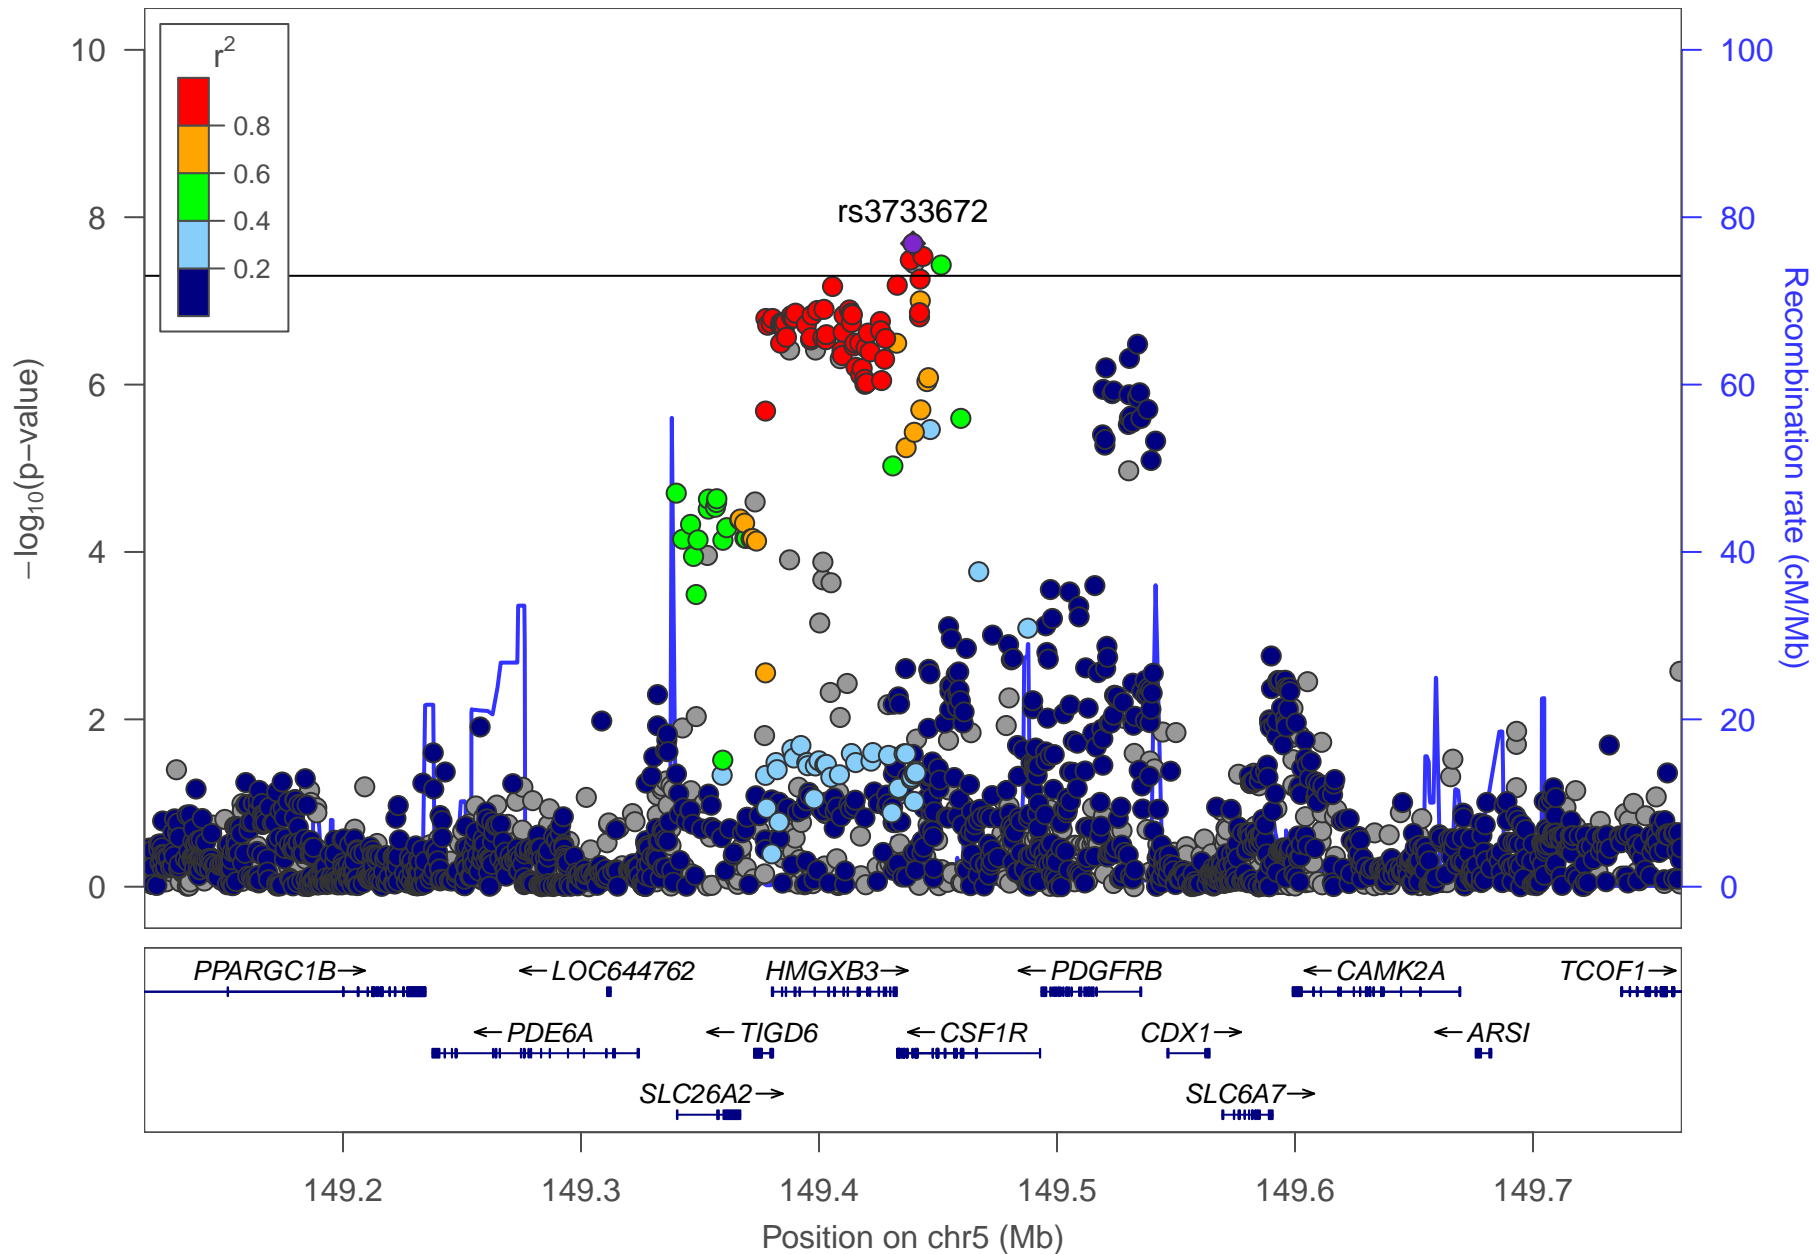

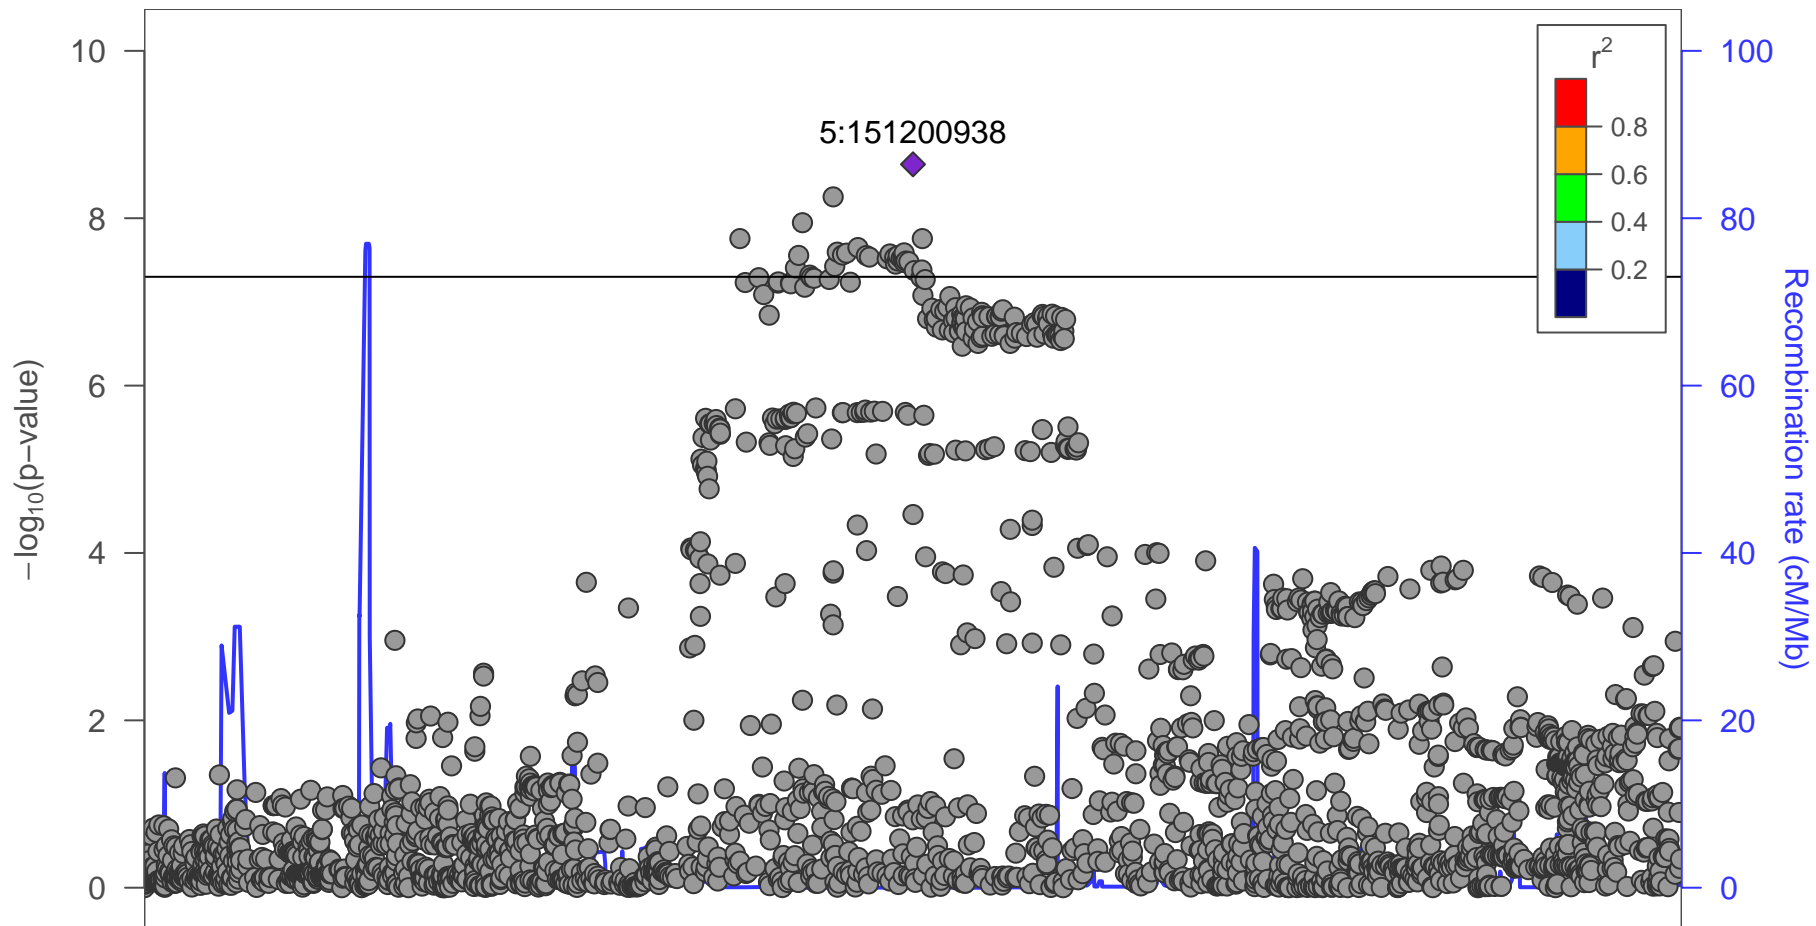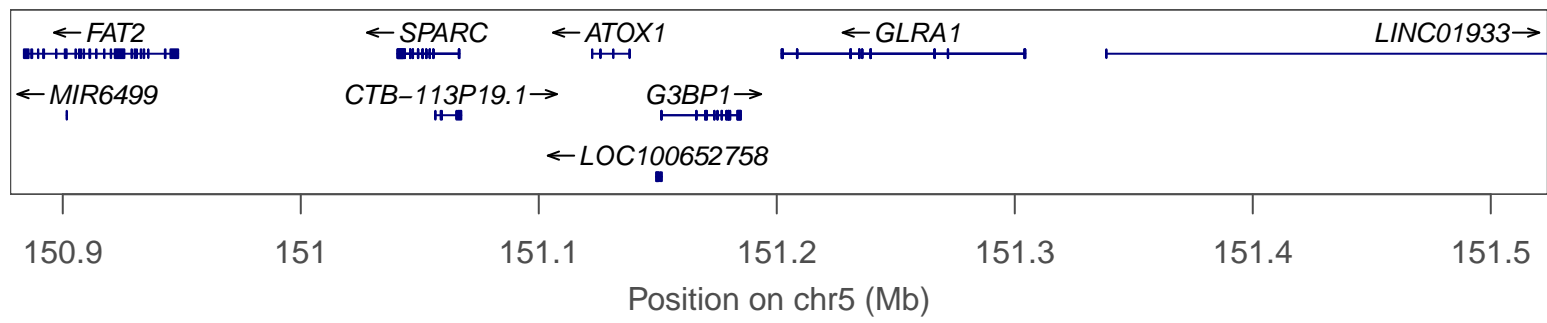

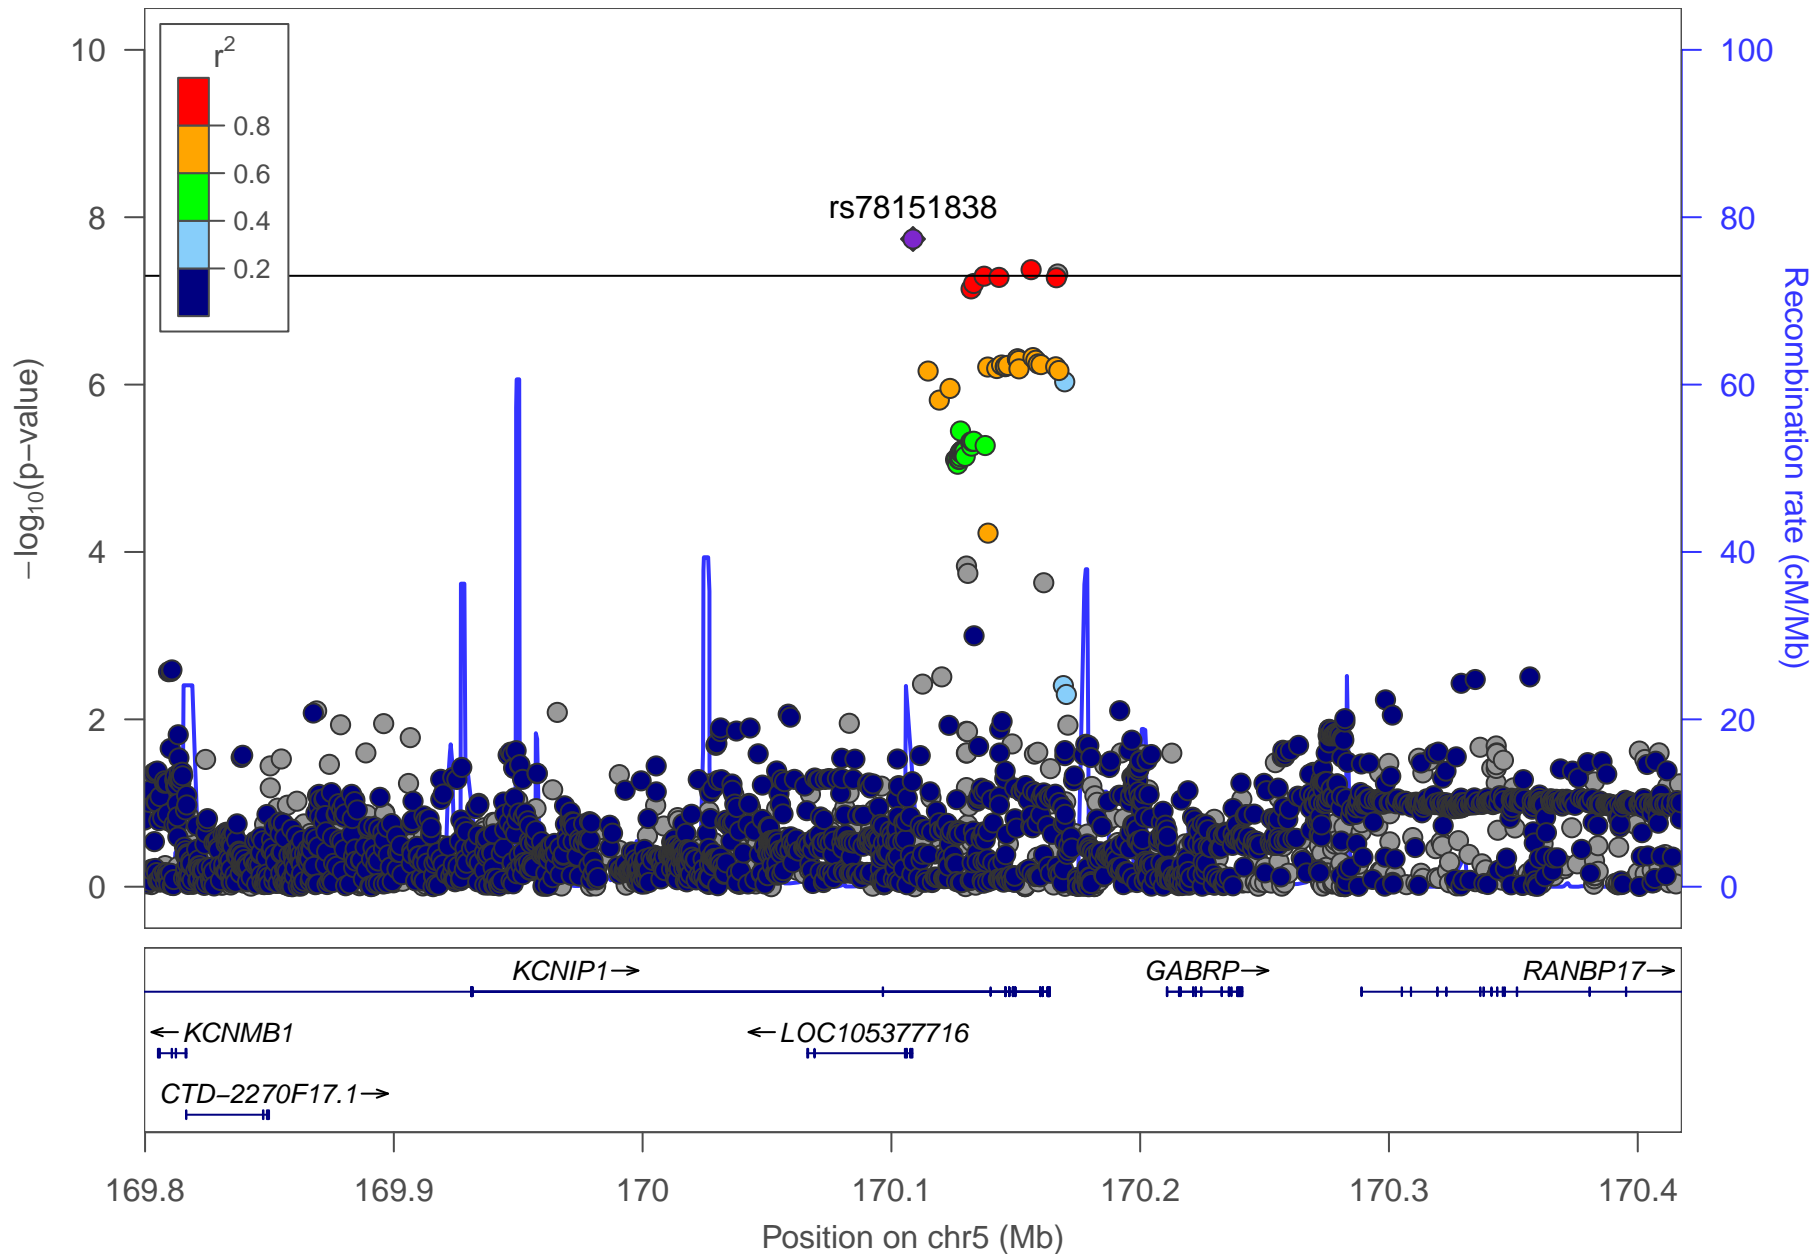

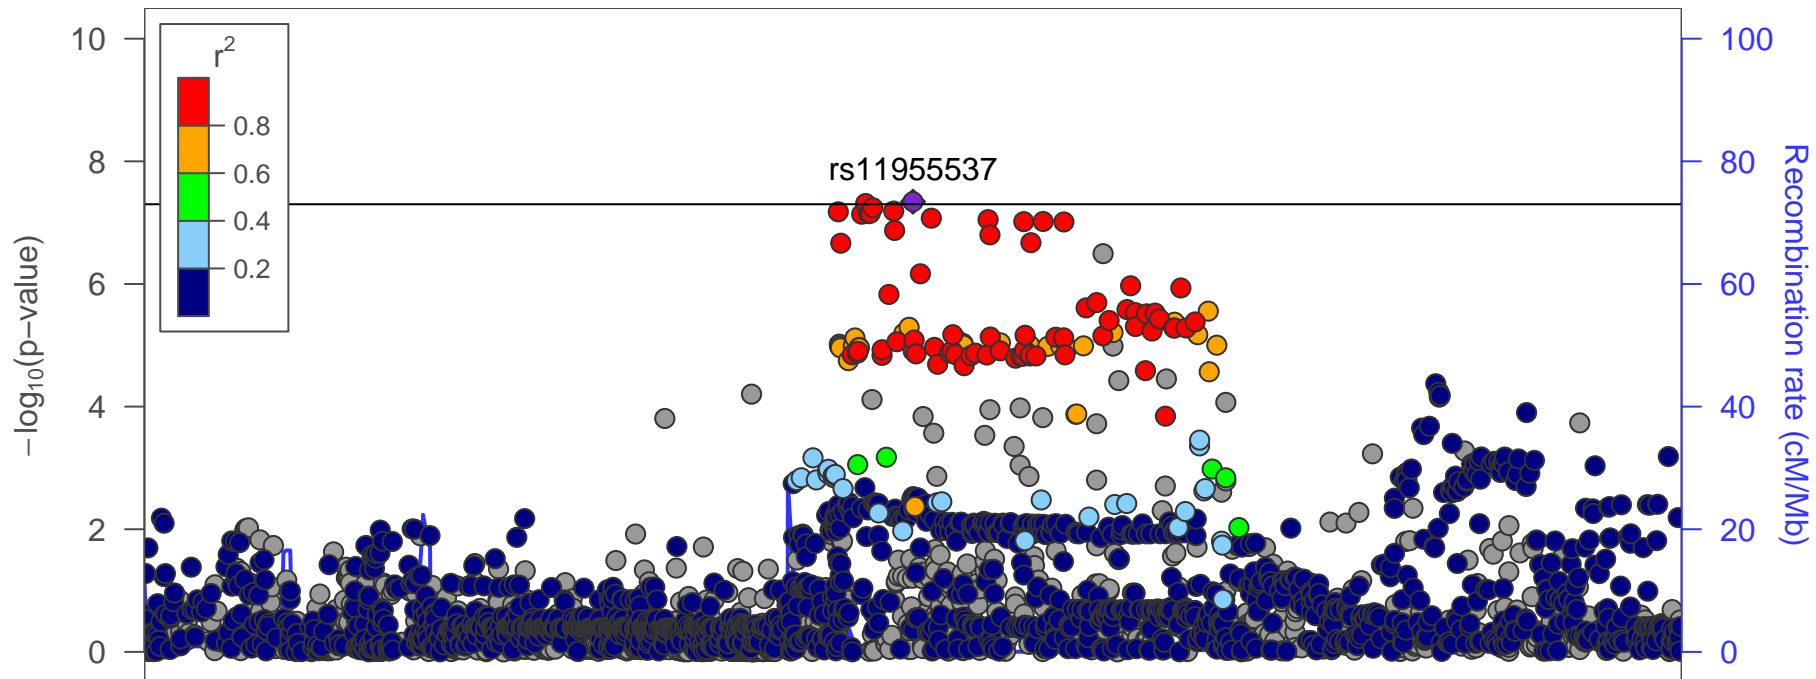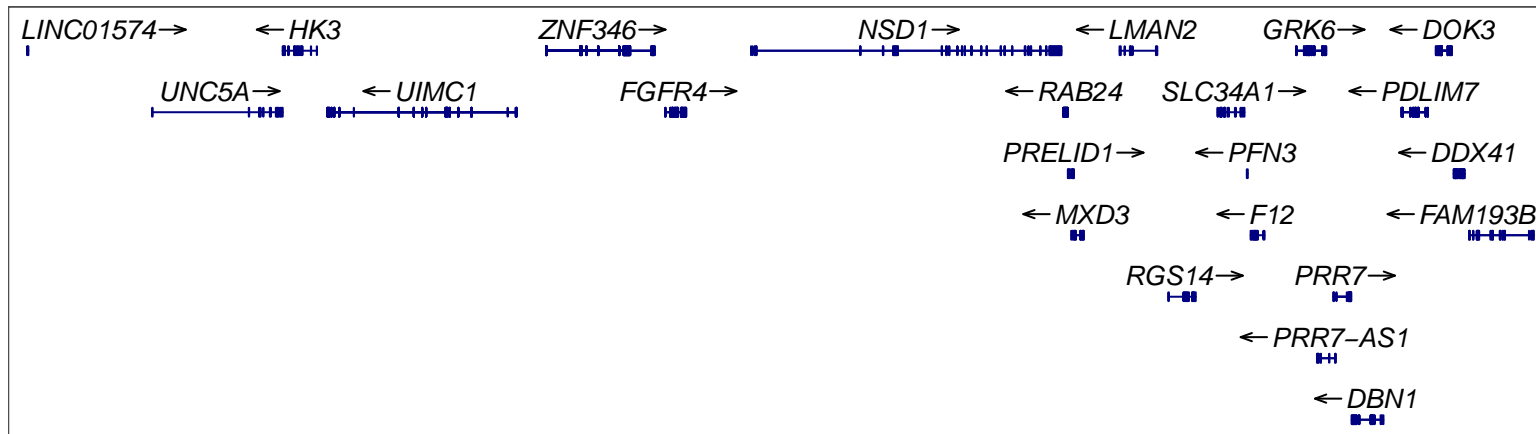

176.2

176.4

176.6

176.8

Position on chr5 (Mb)

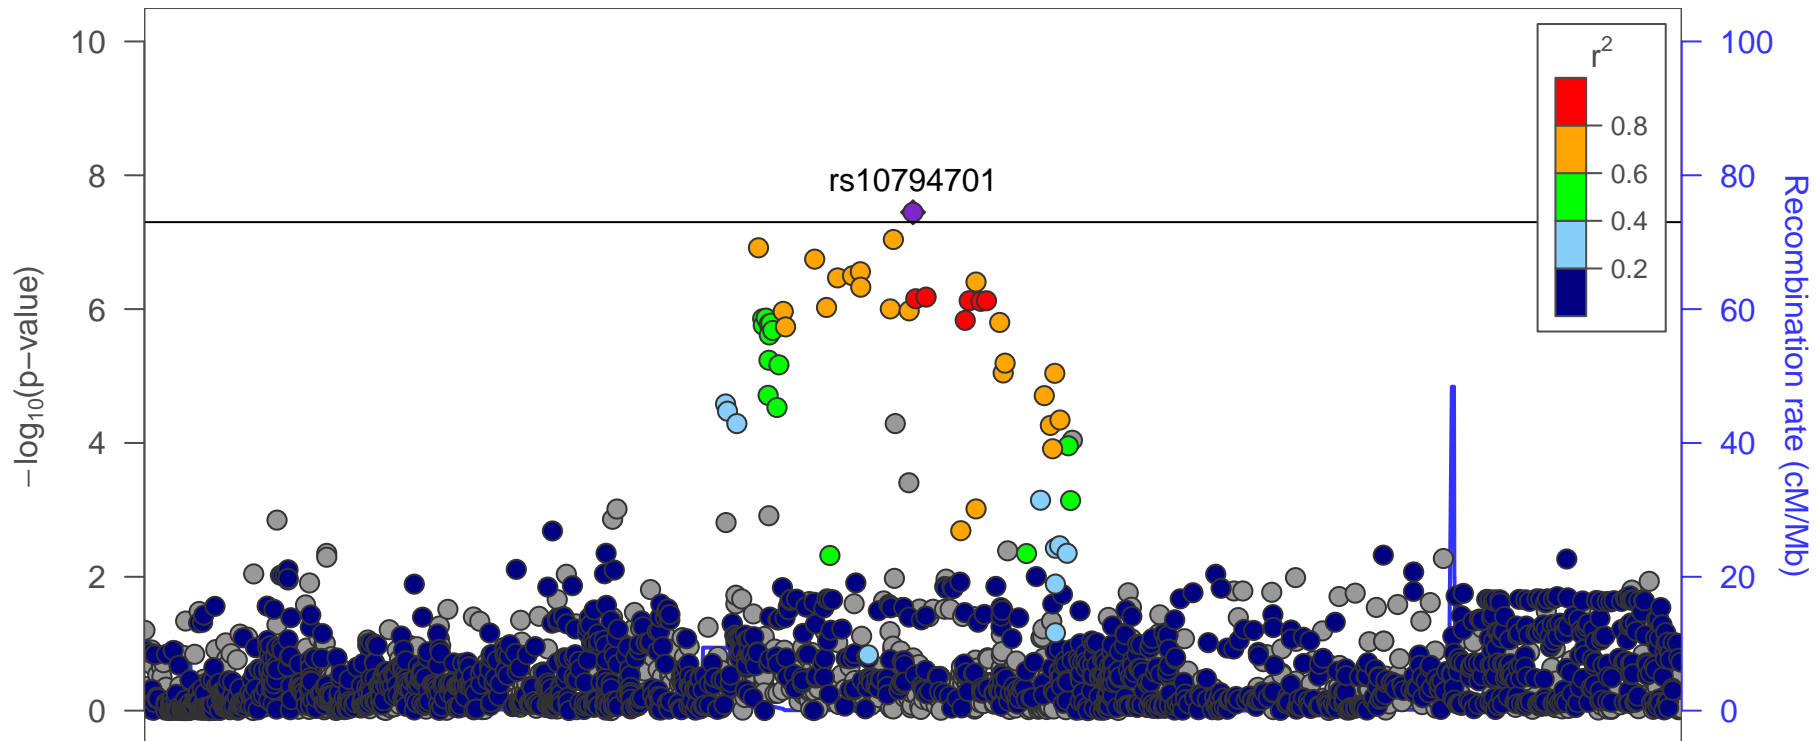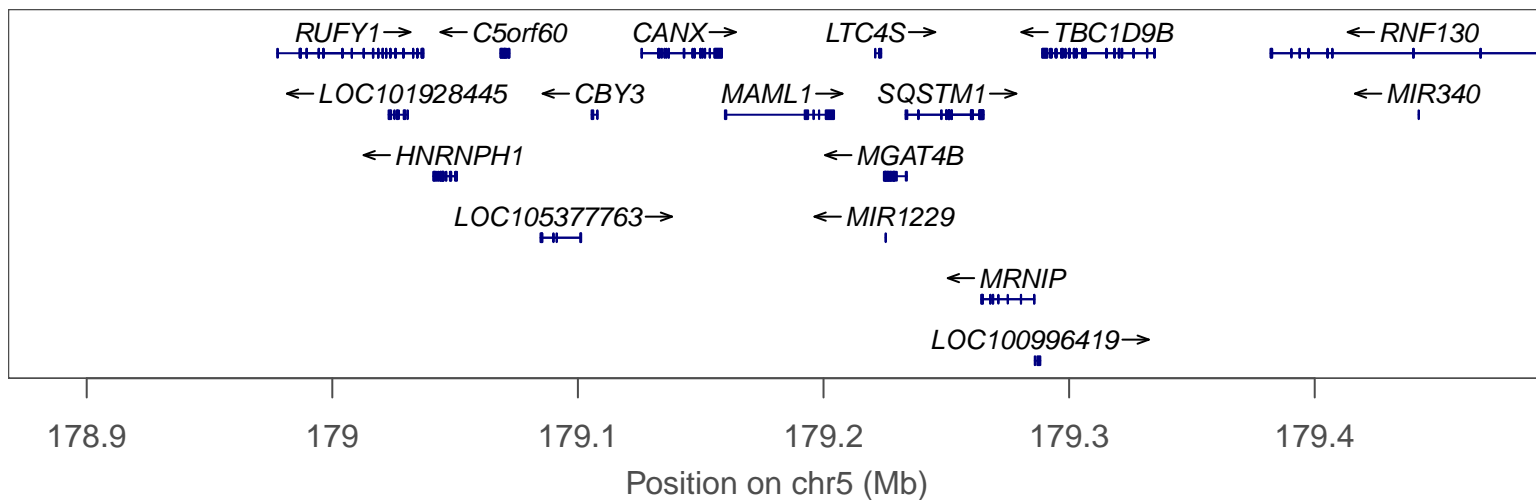



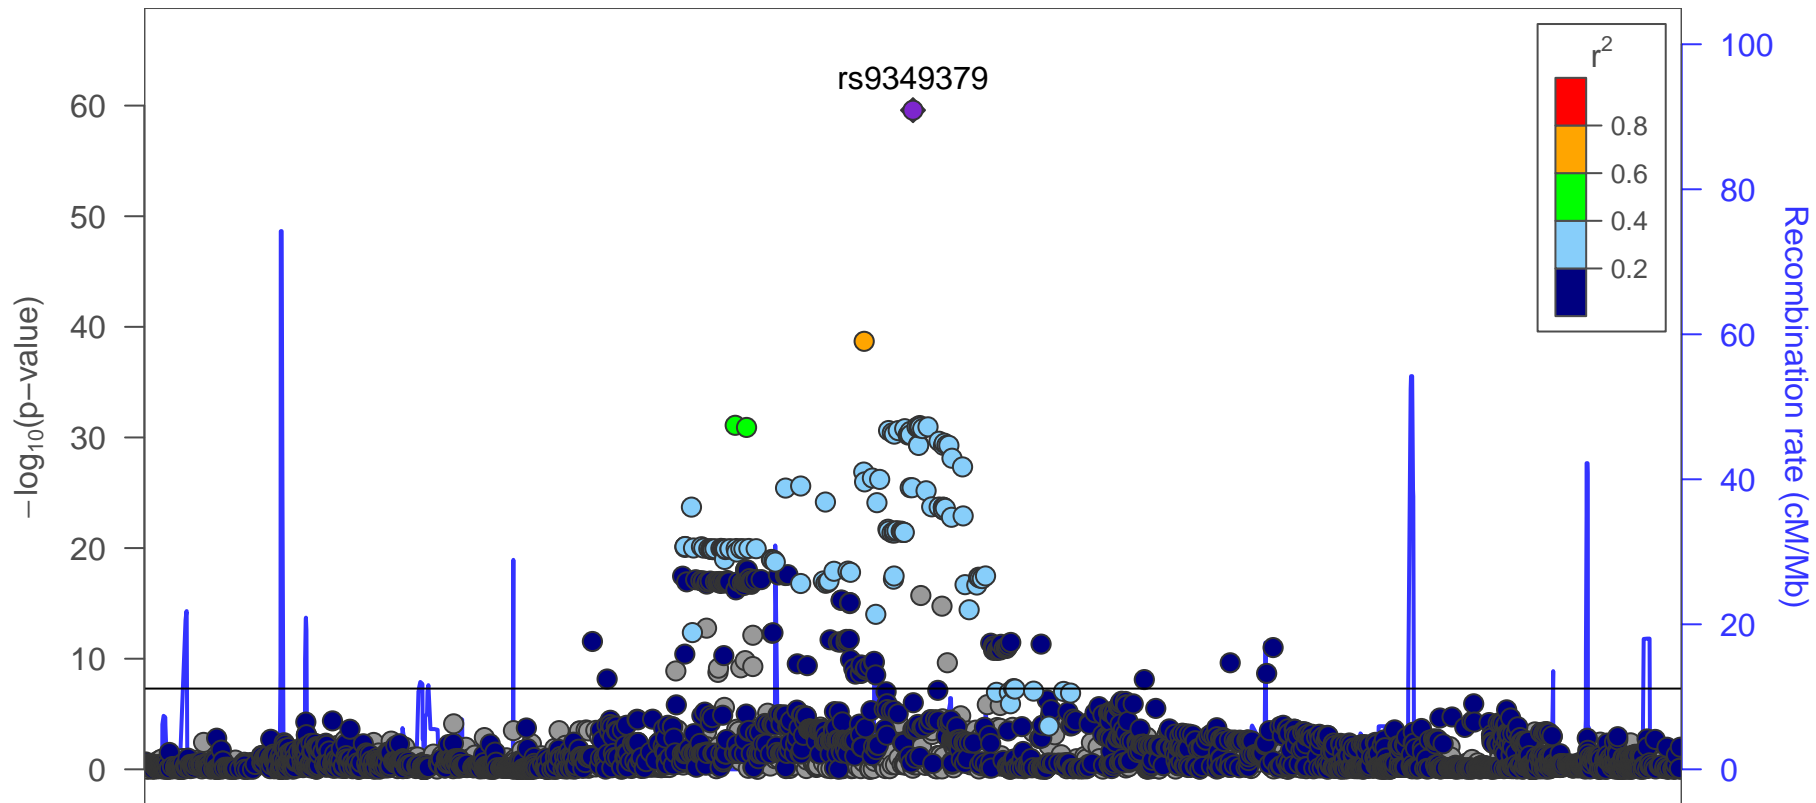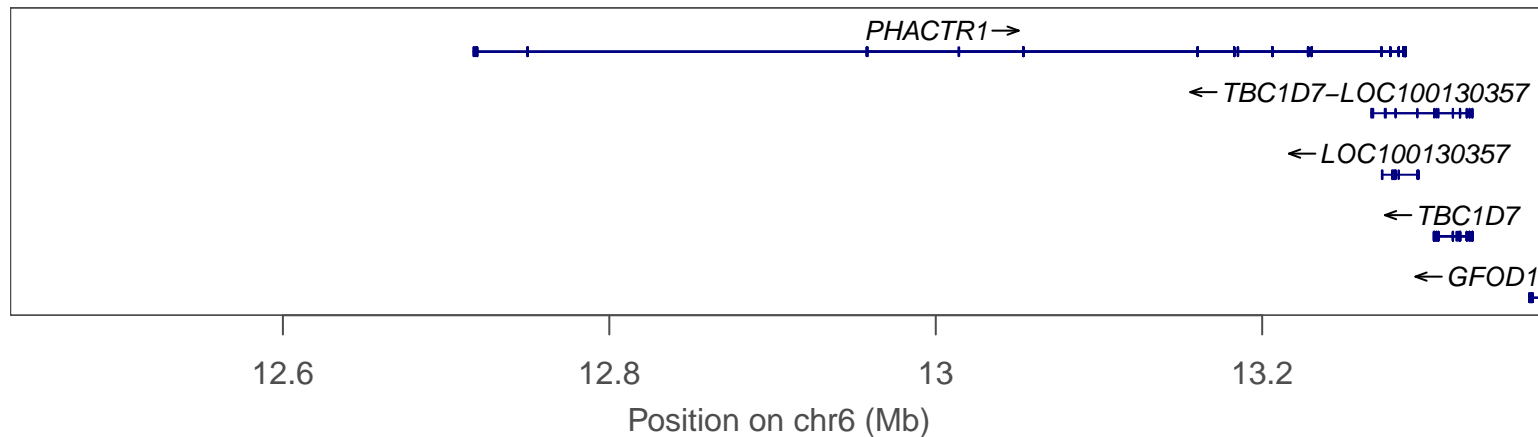

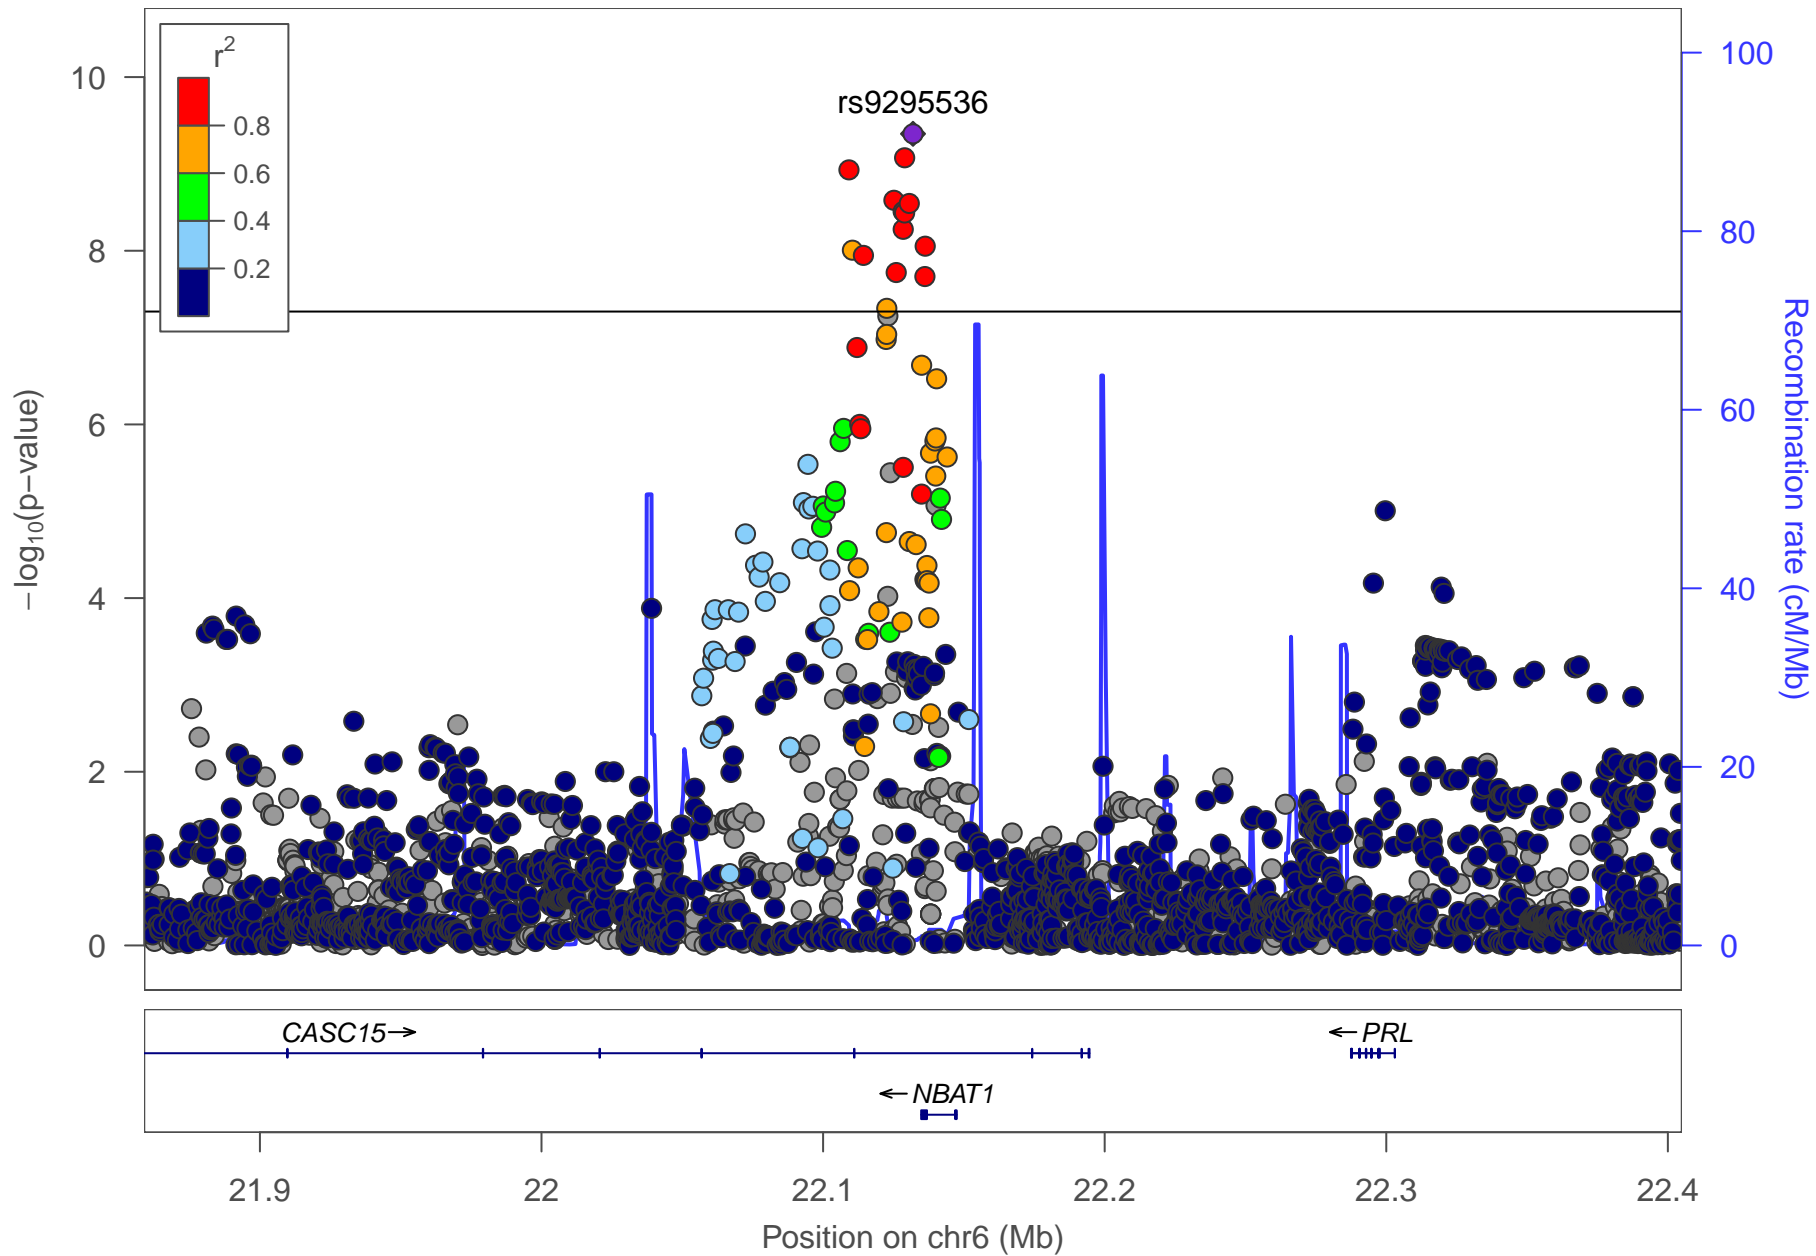

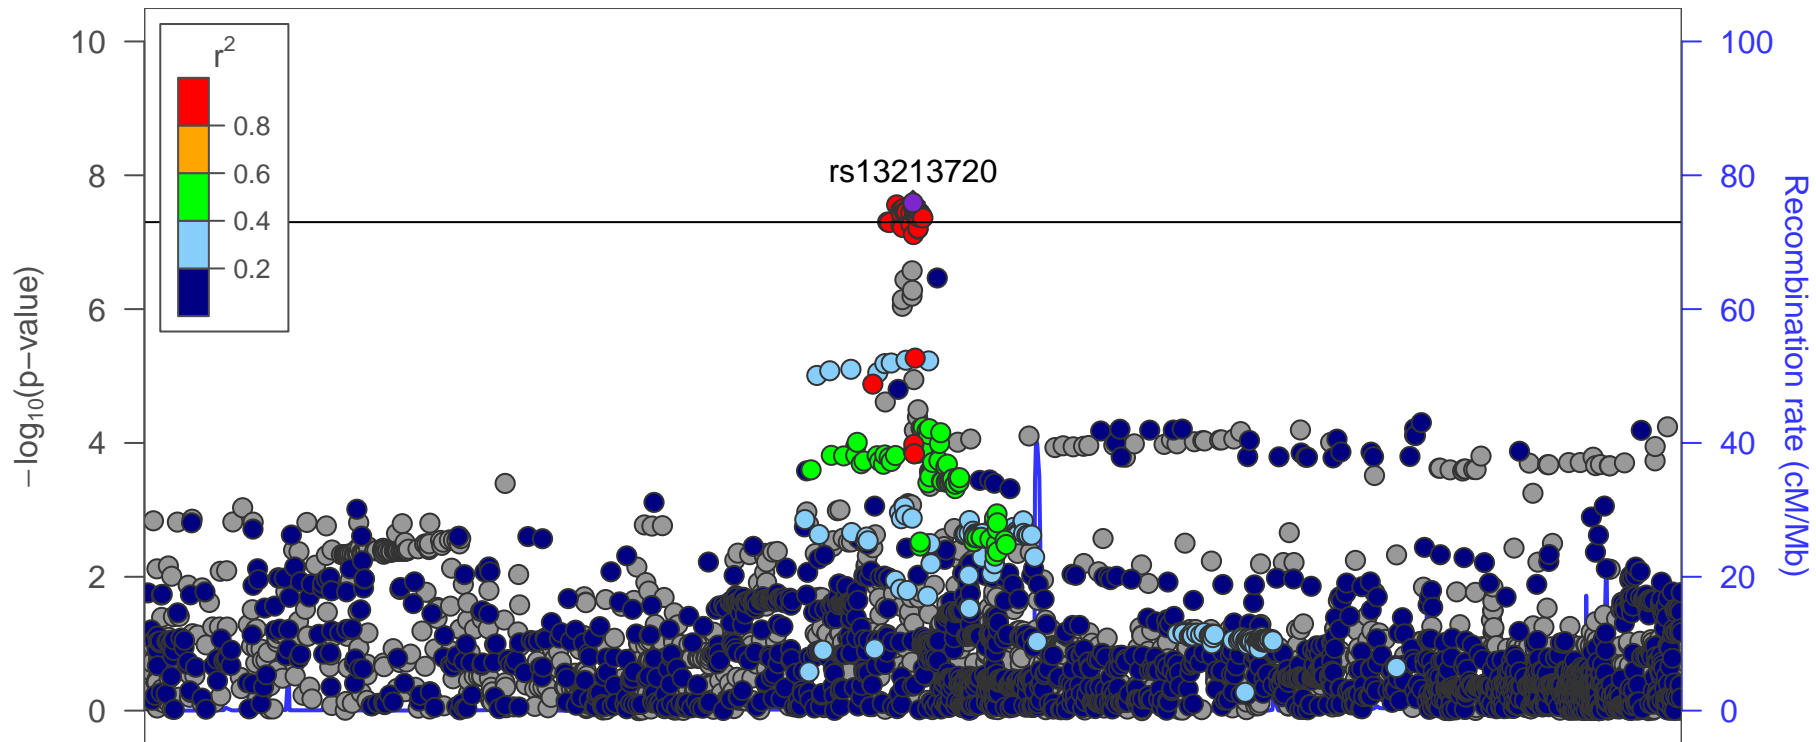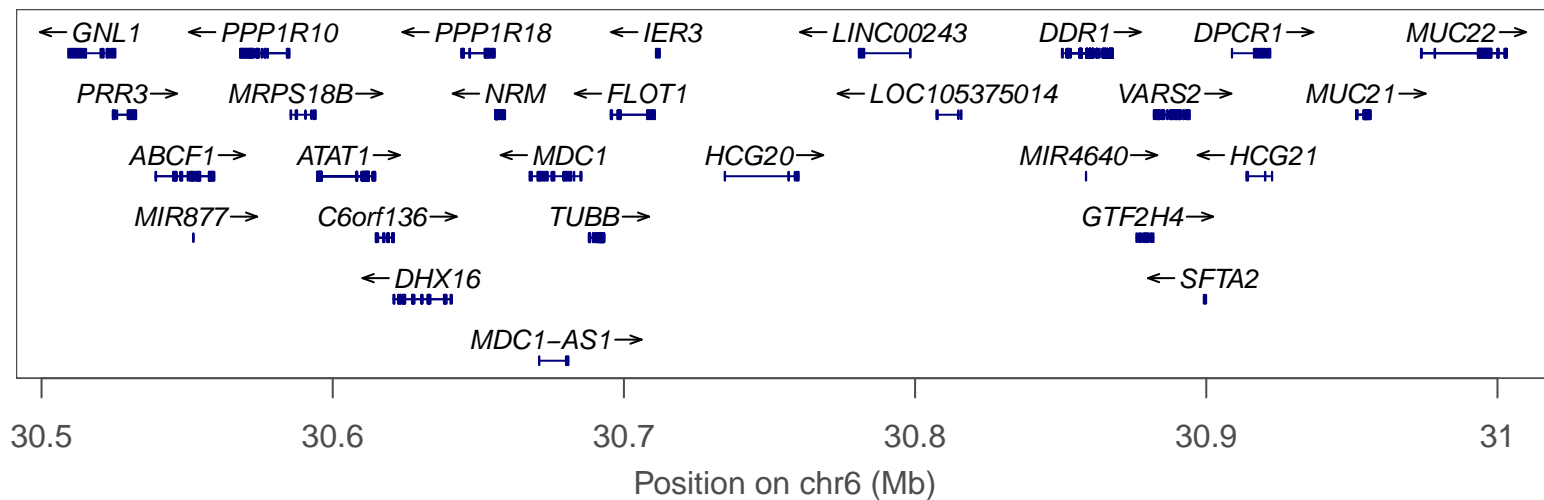

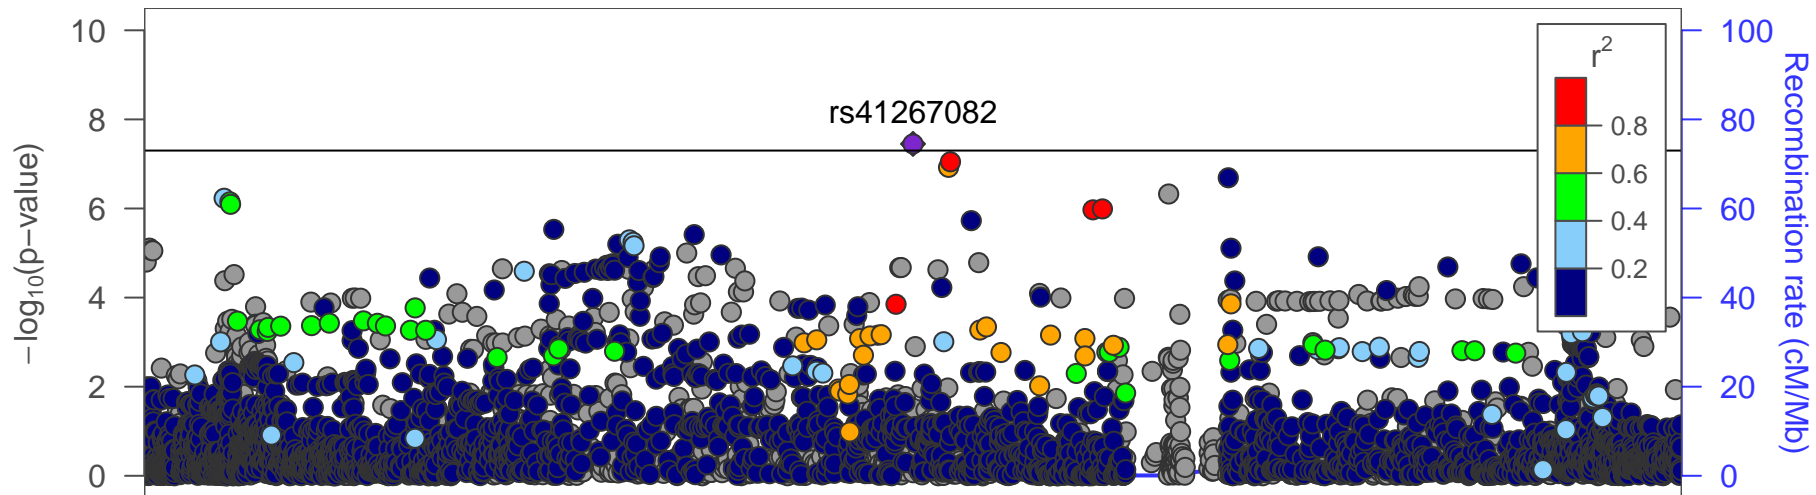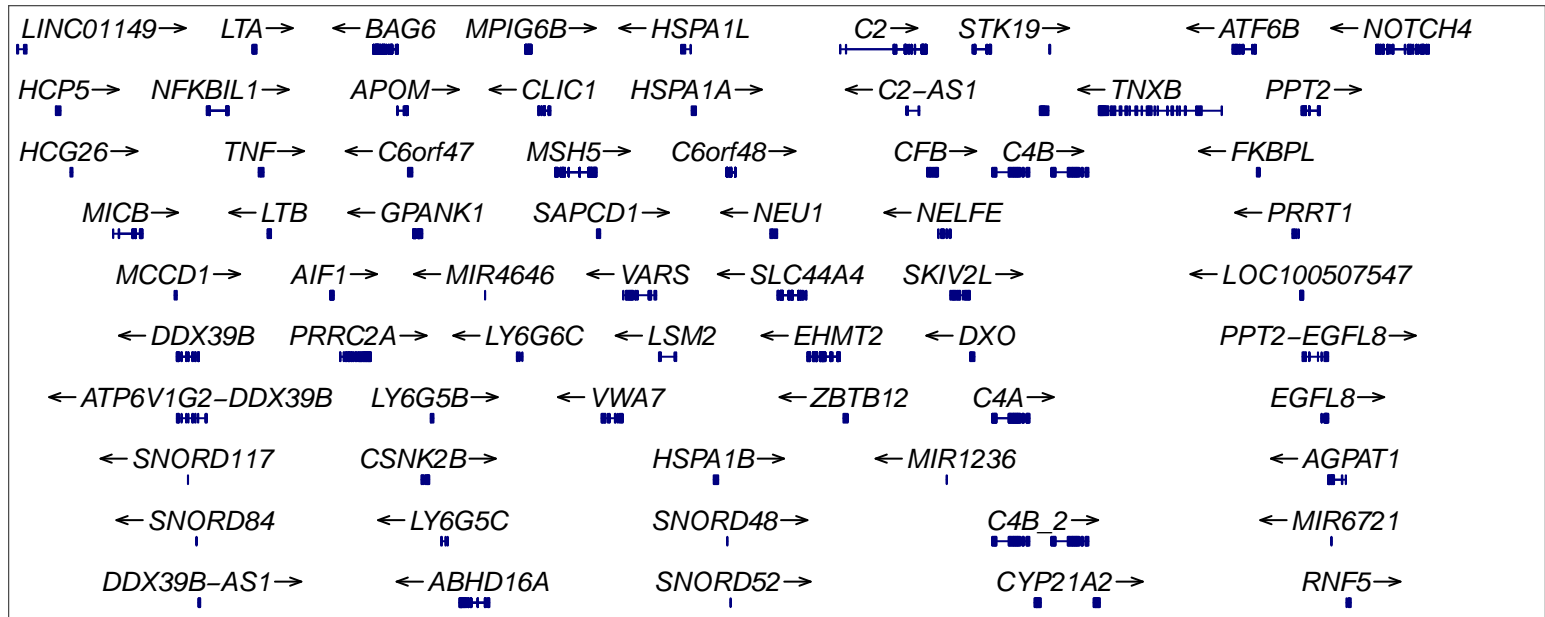

19 genes omitted

31.6

31.8

32

32.2

Position on chr6 (Mb)

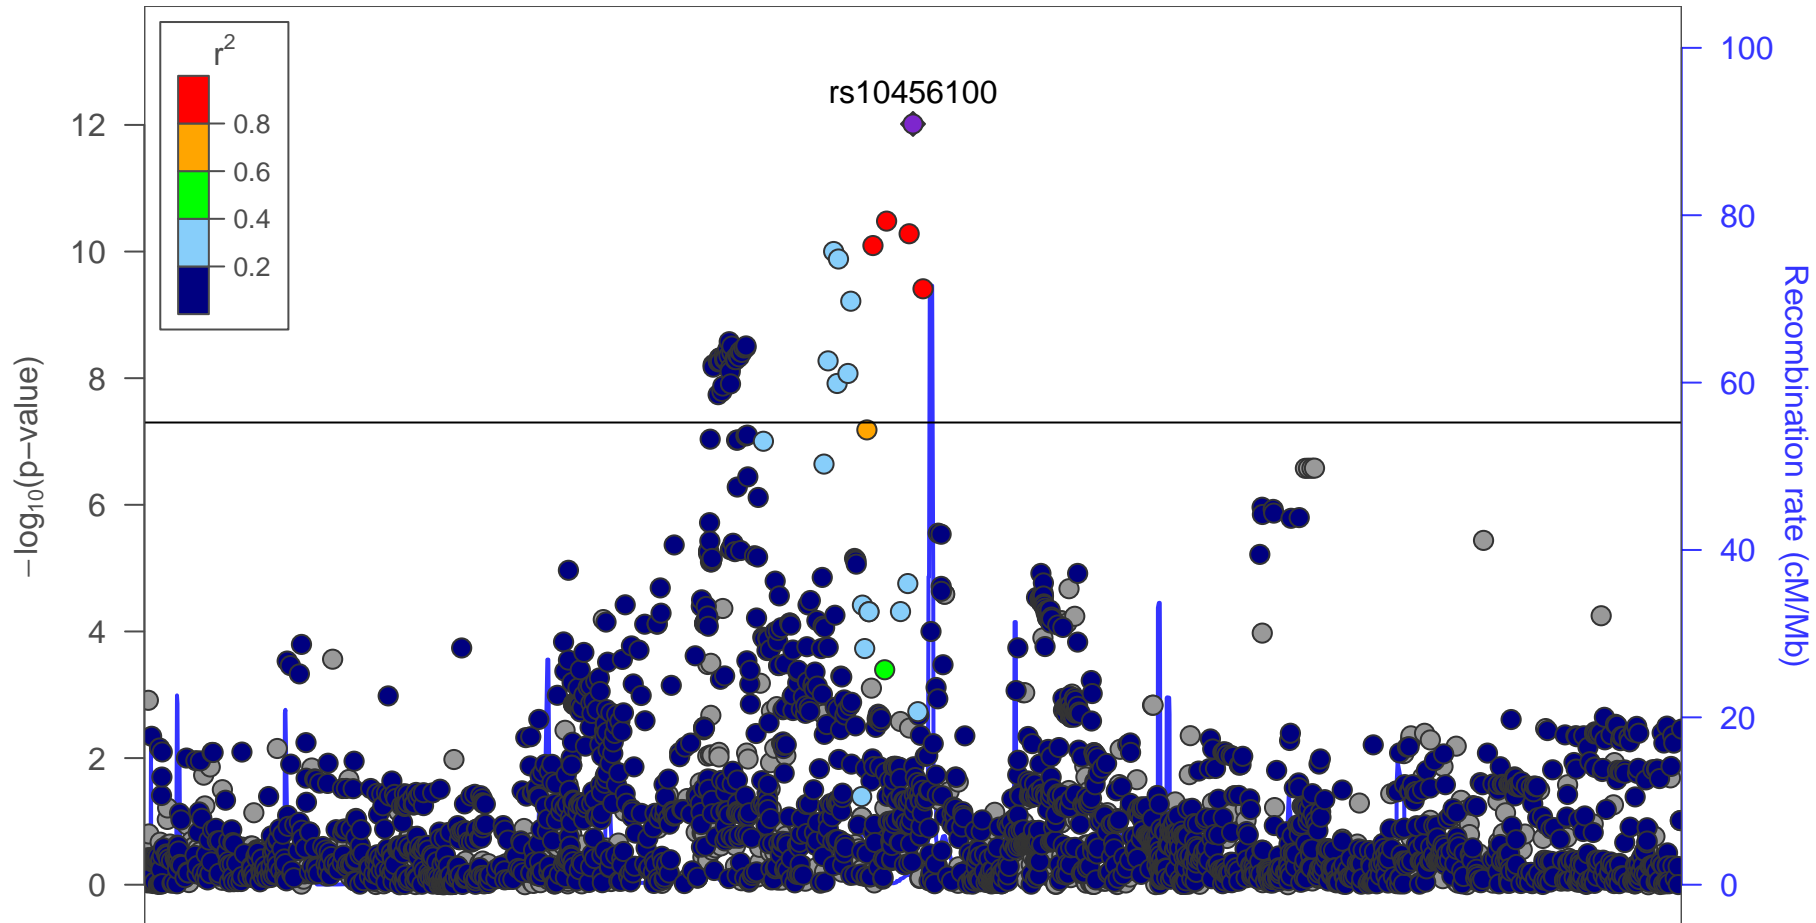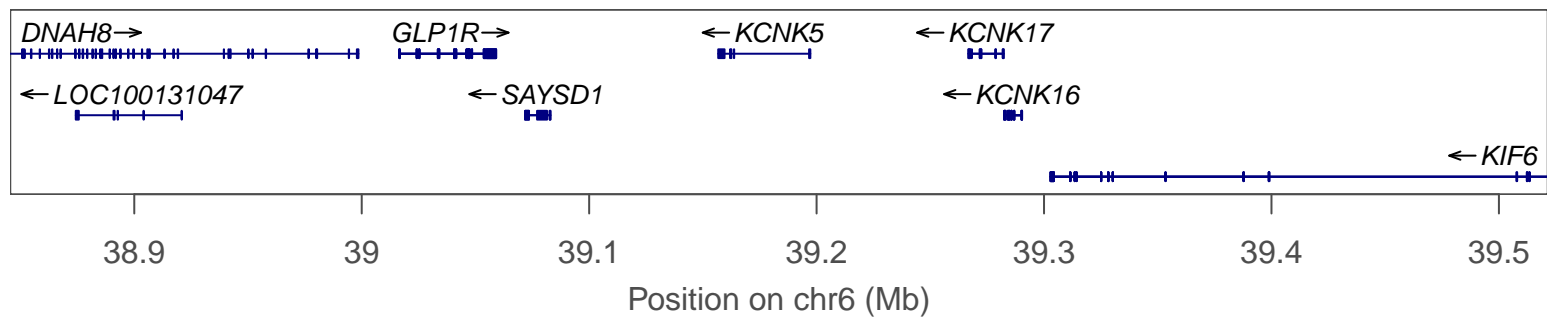

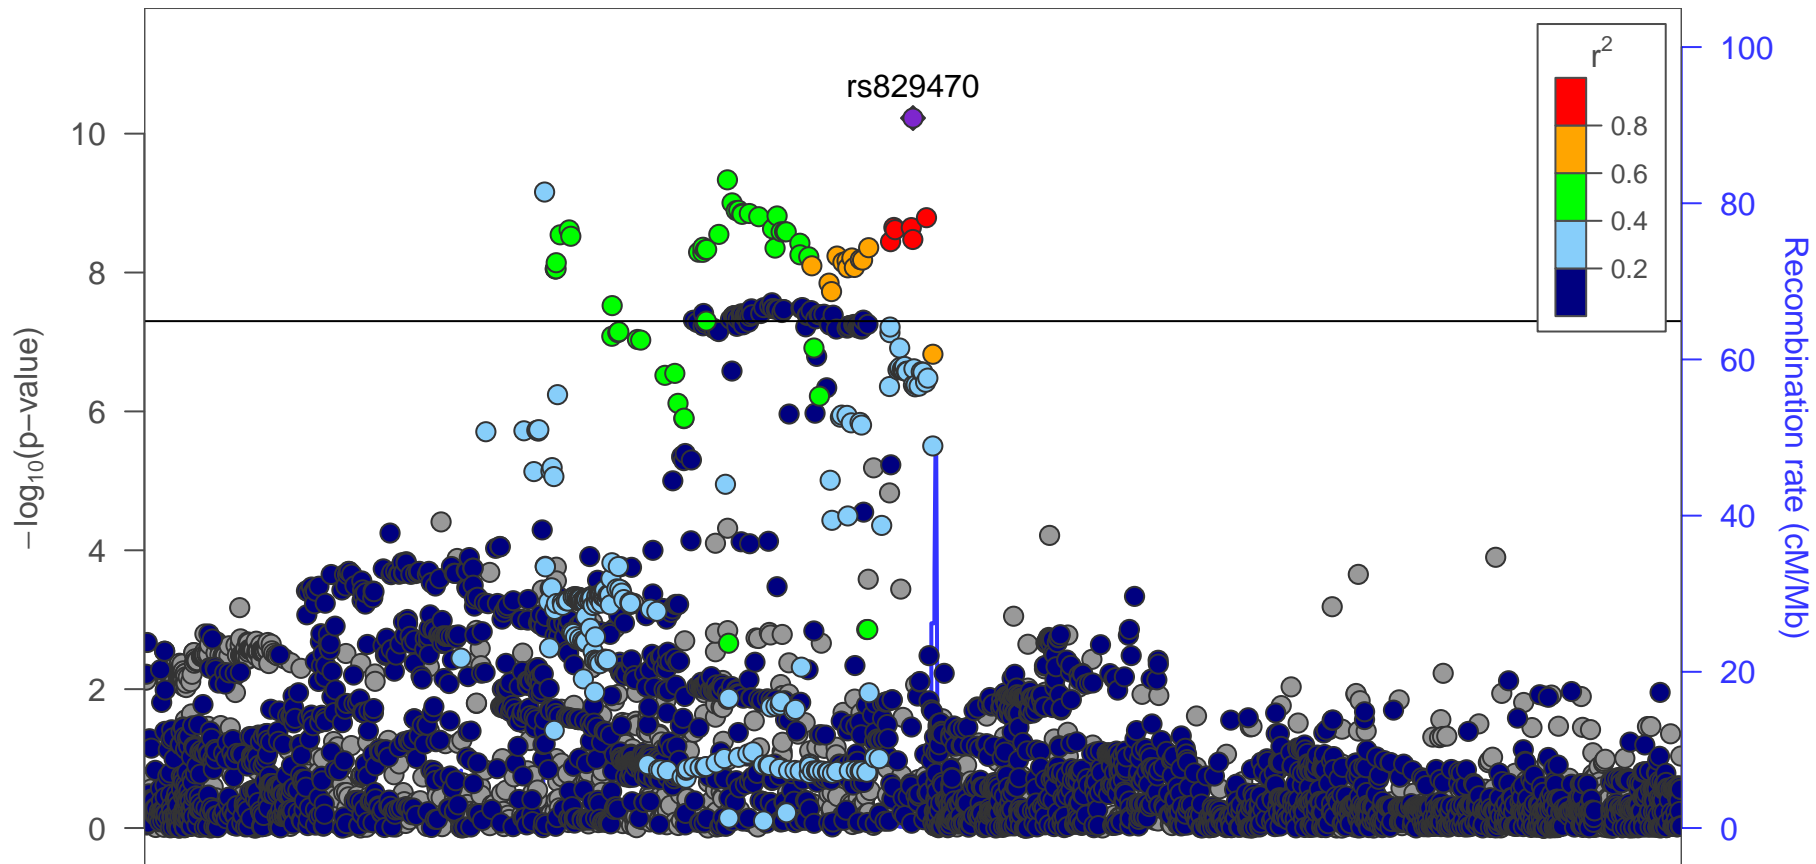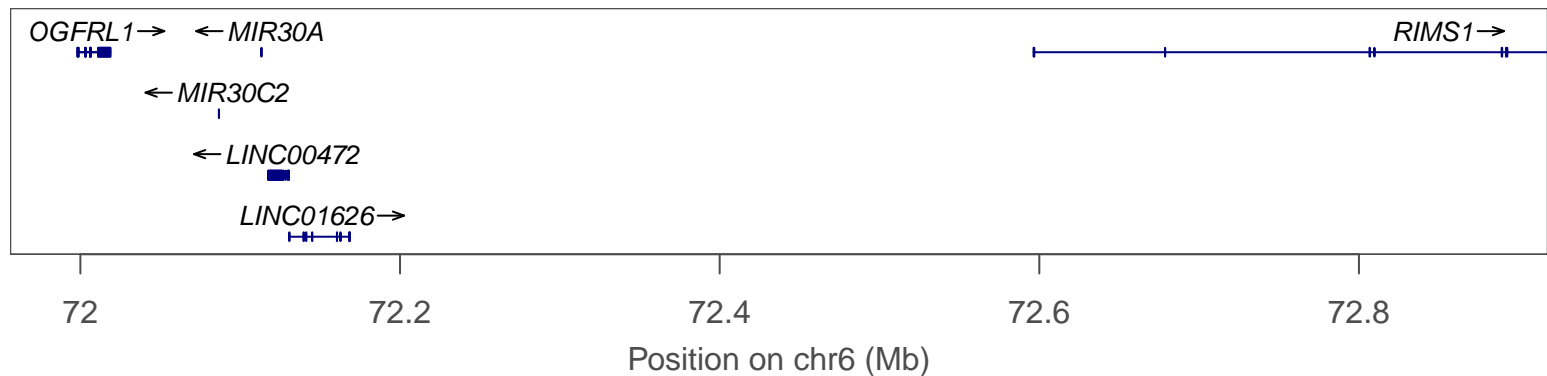

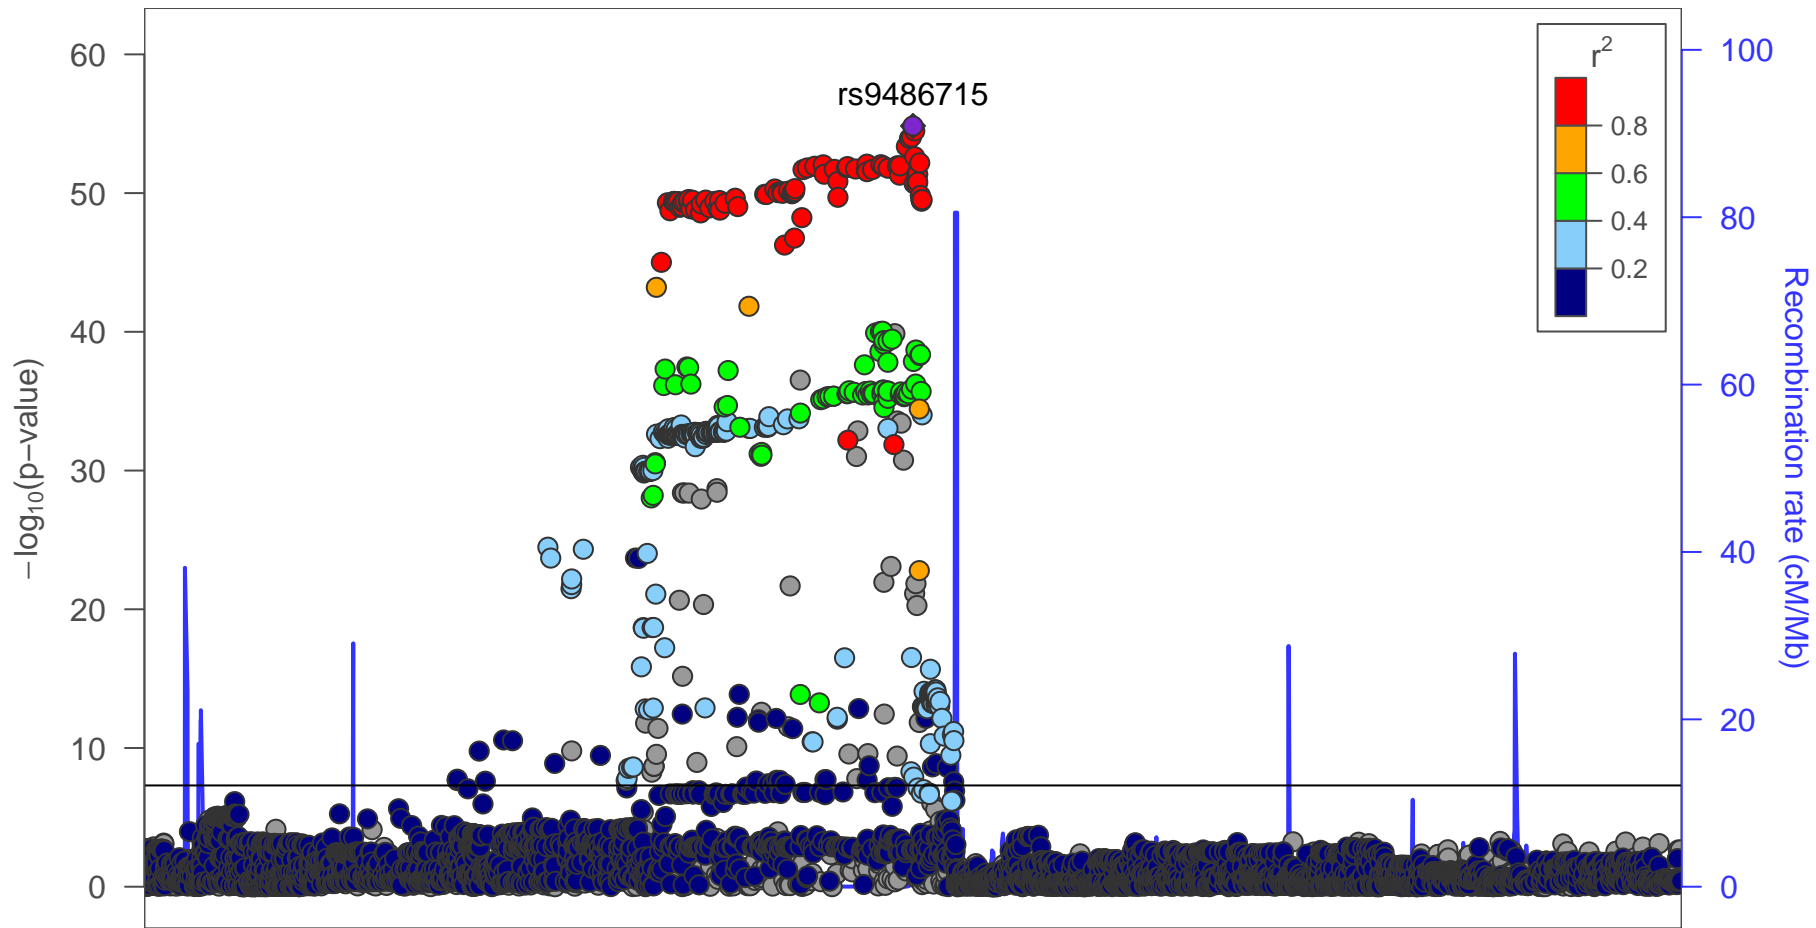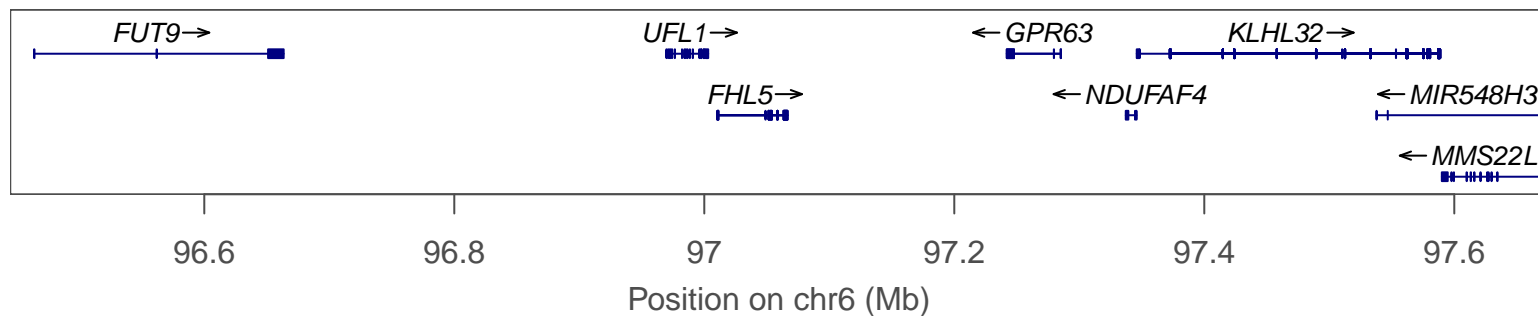

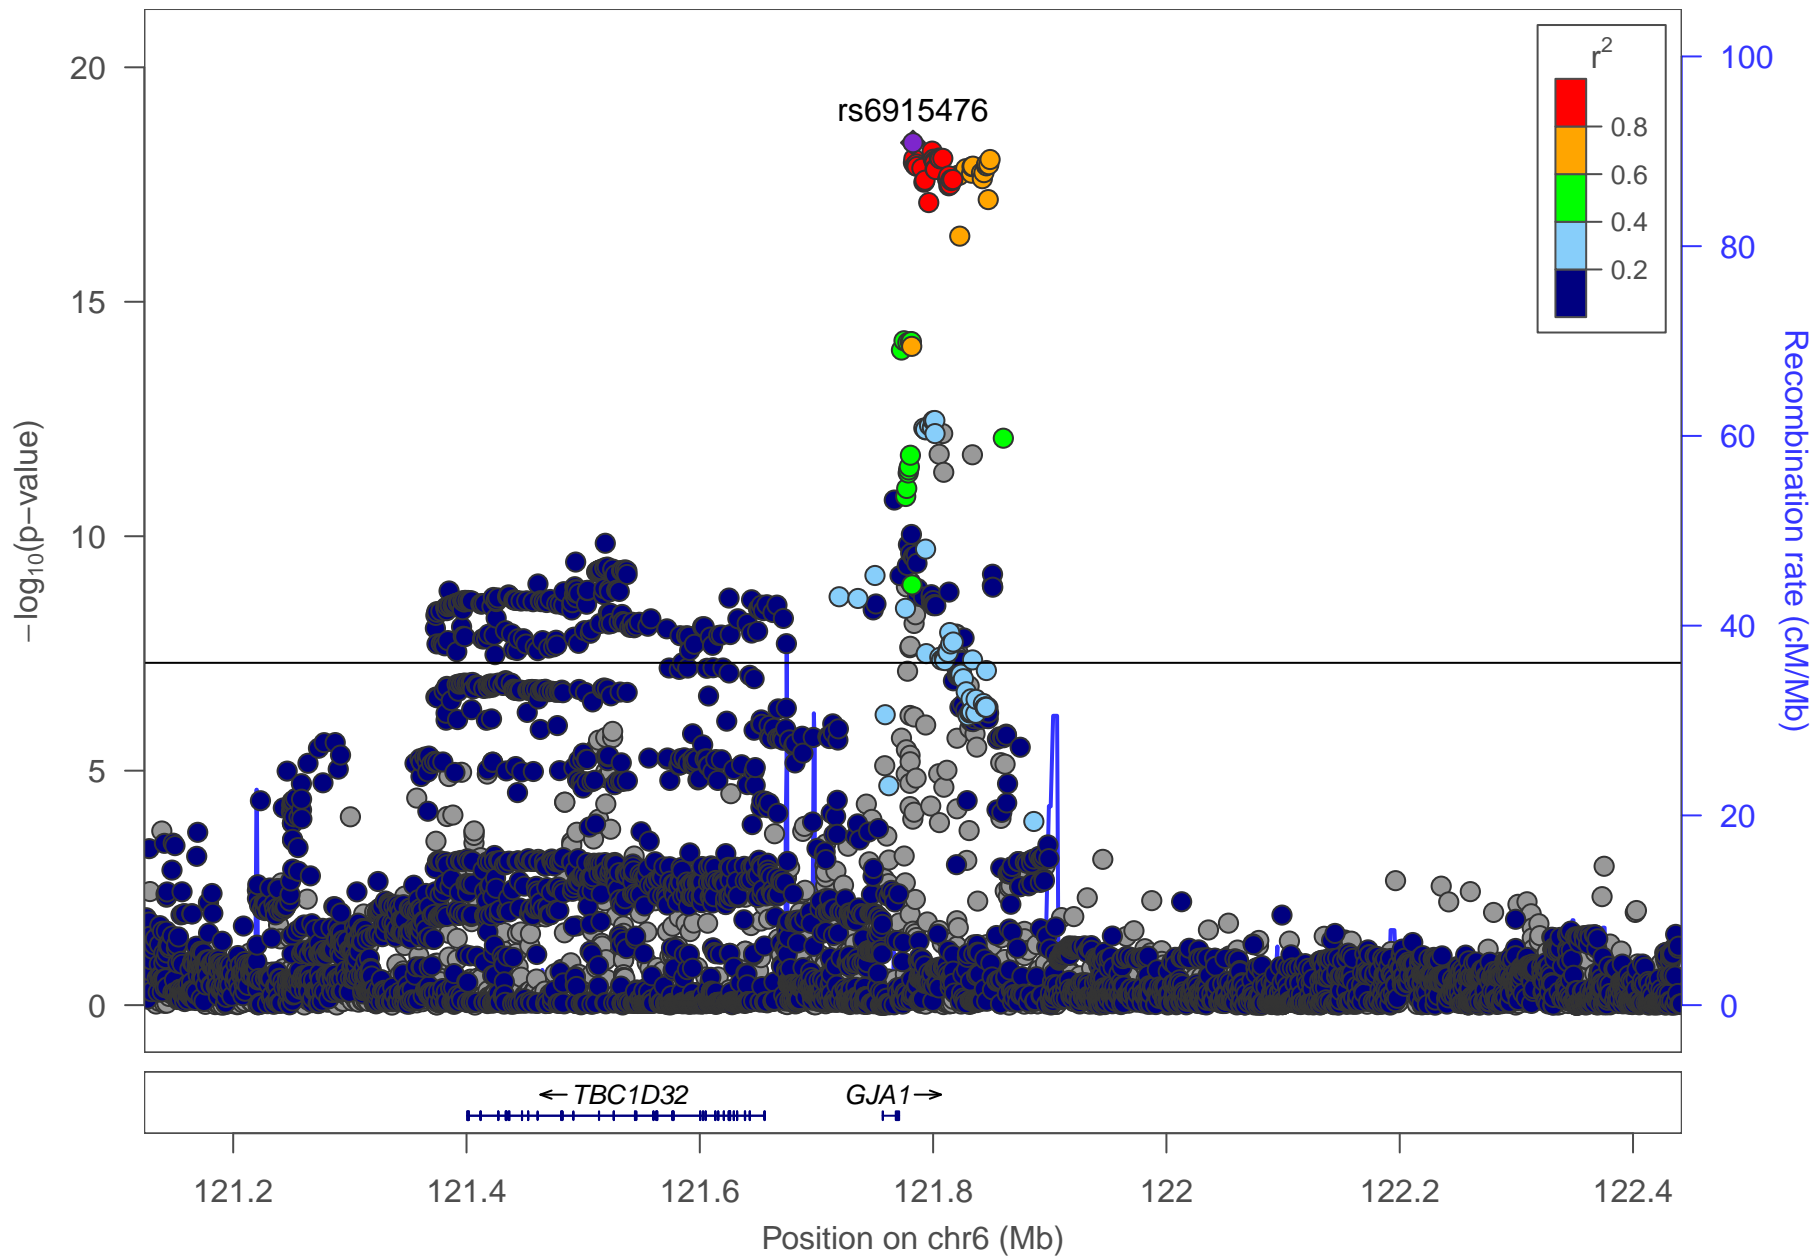



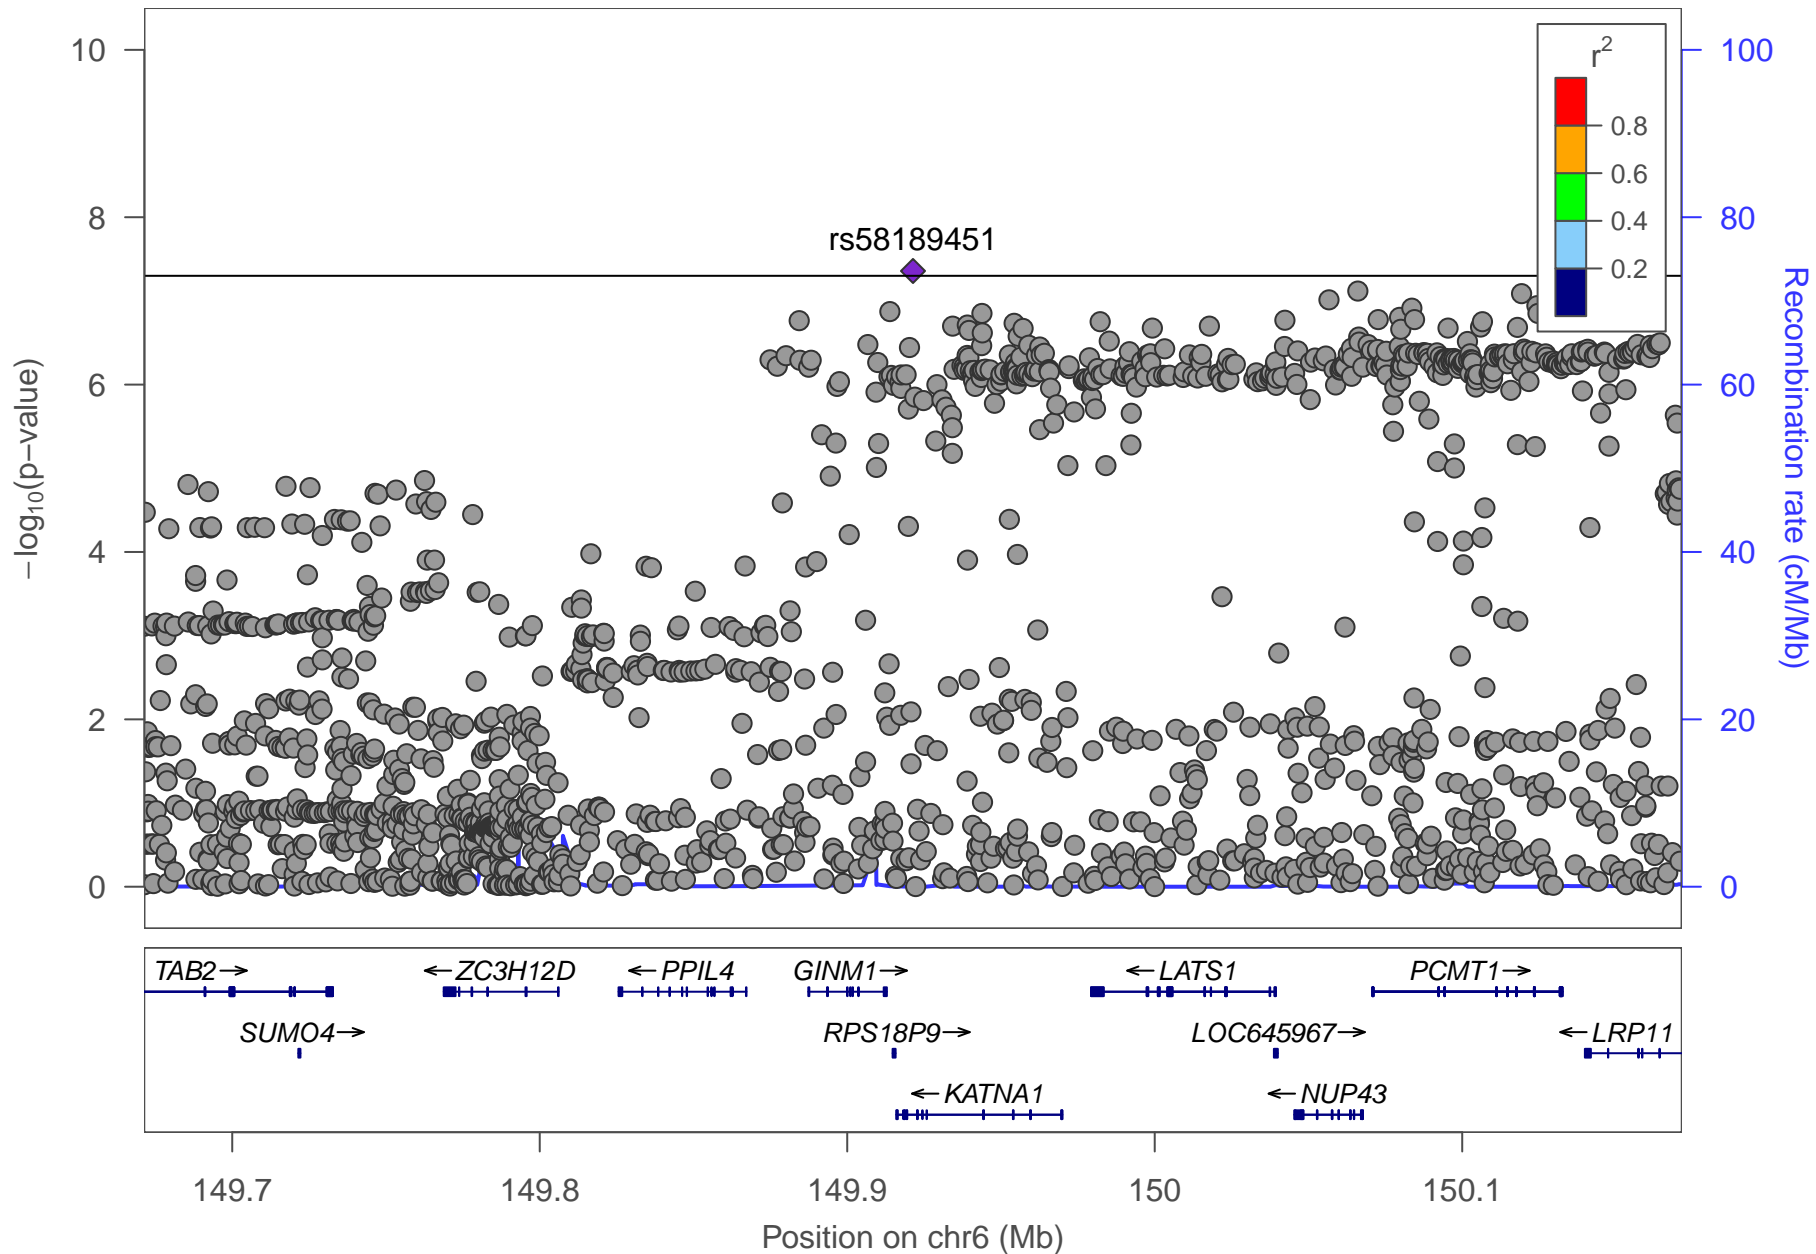

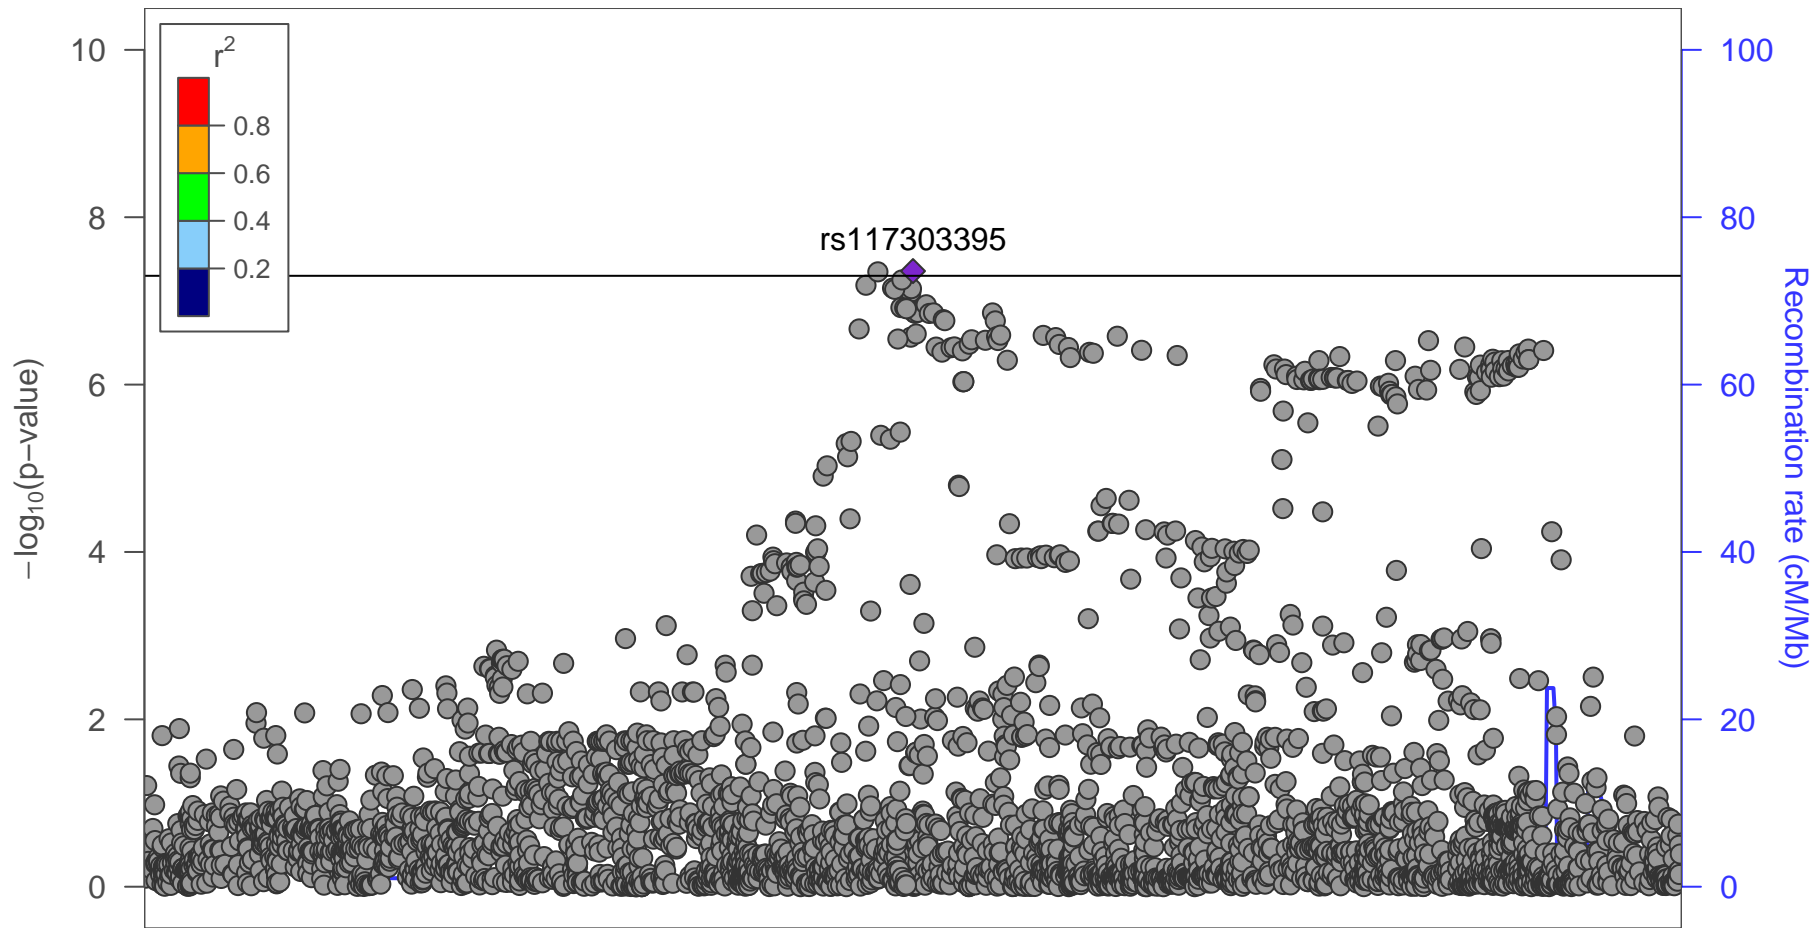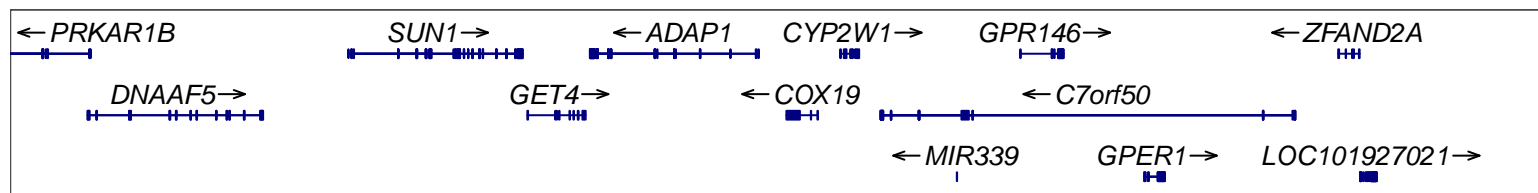

0.8                      0.9                      1                      1.1                      1.2

Position on chr7 (Mb)

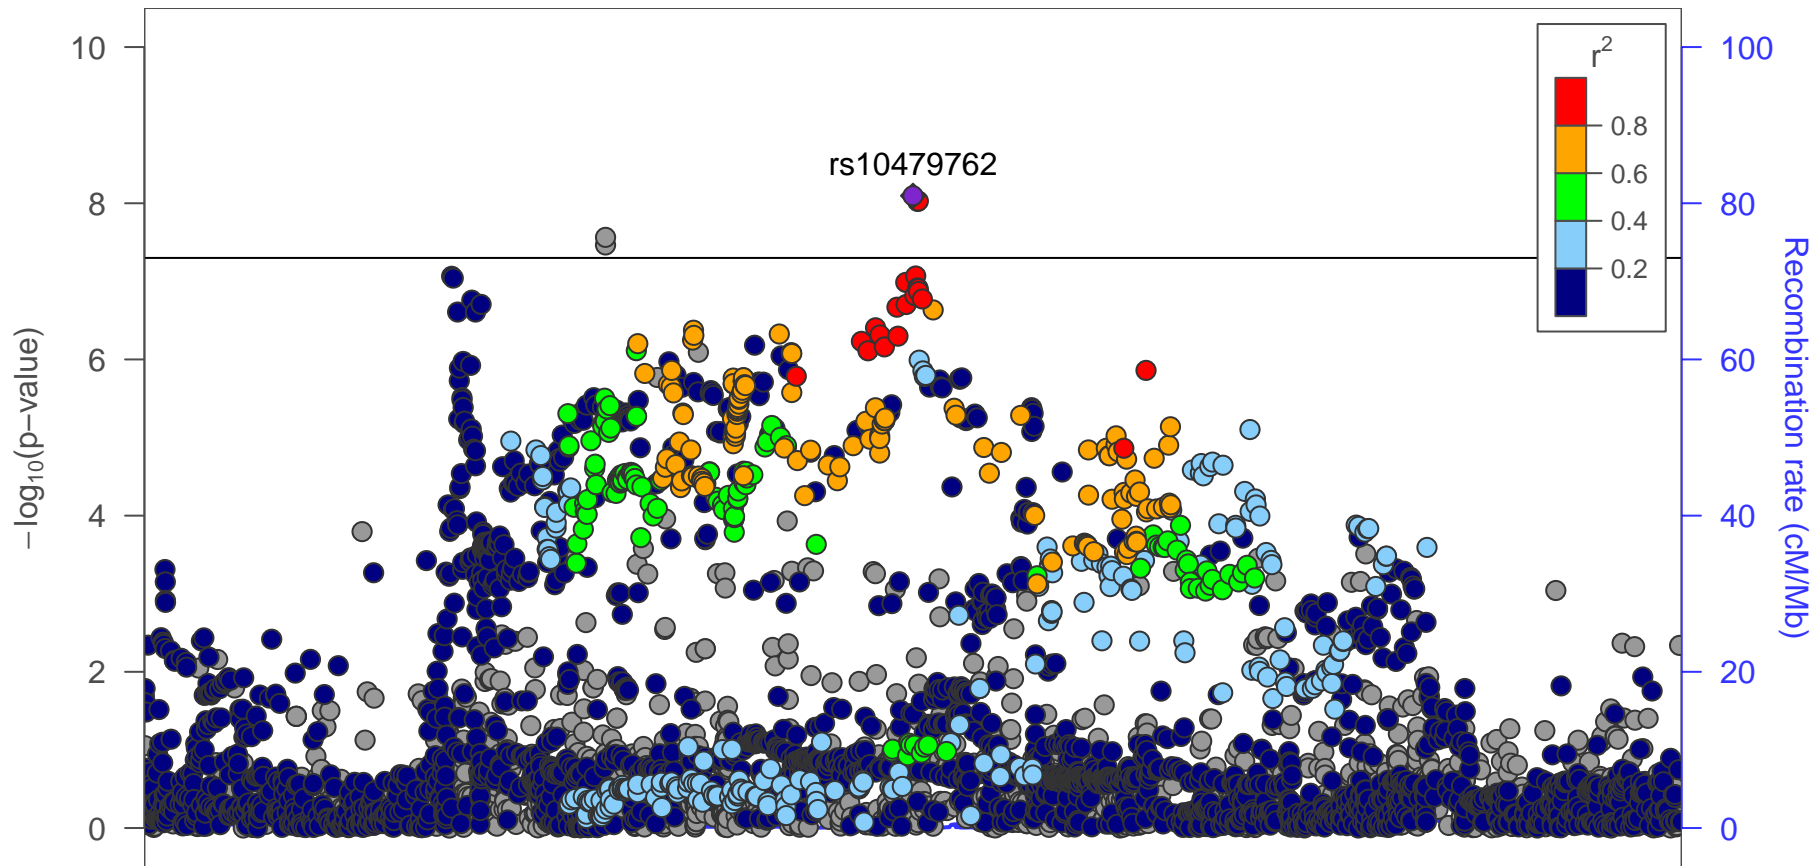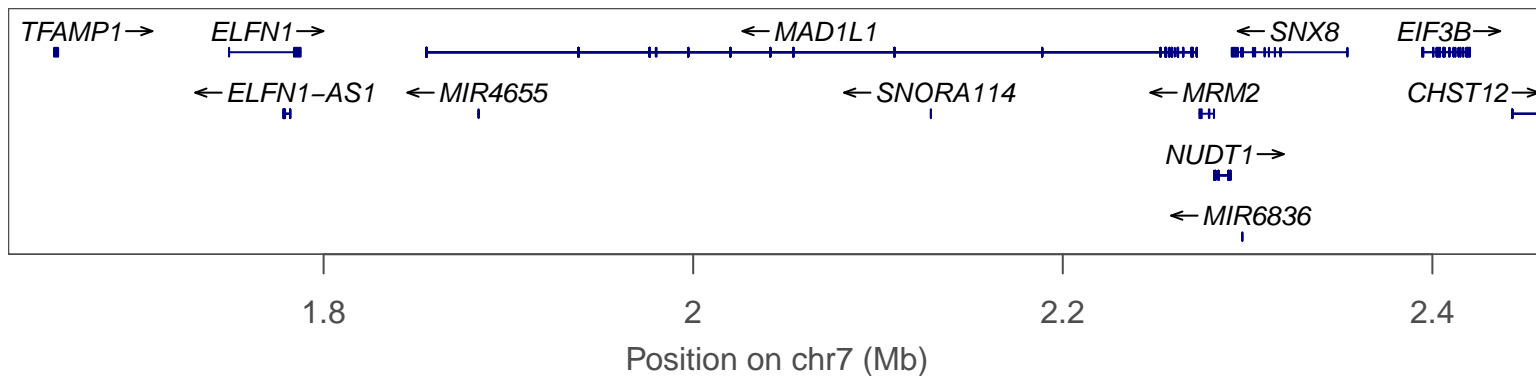

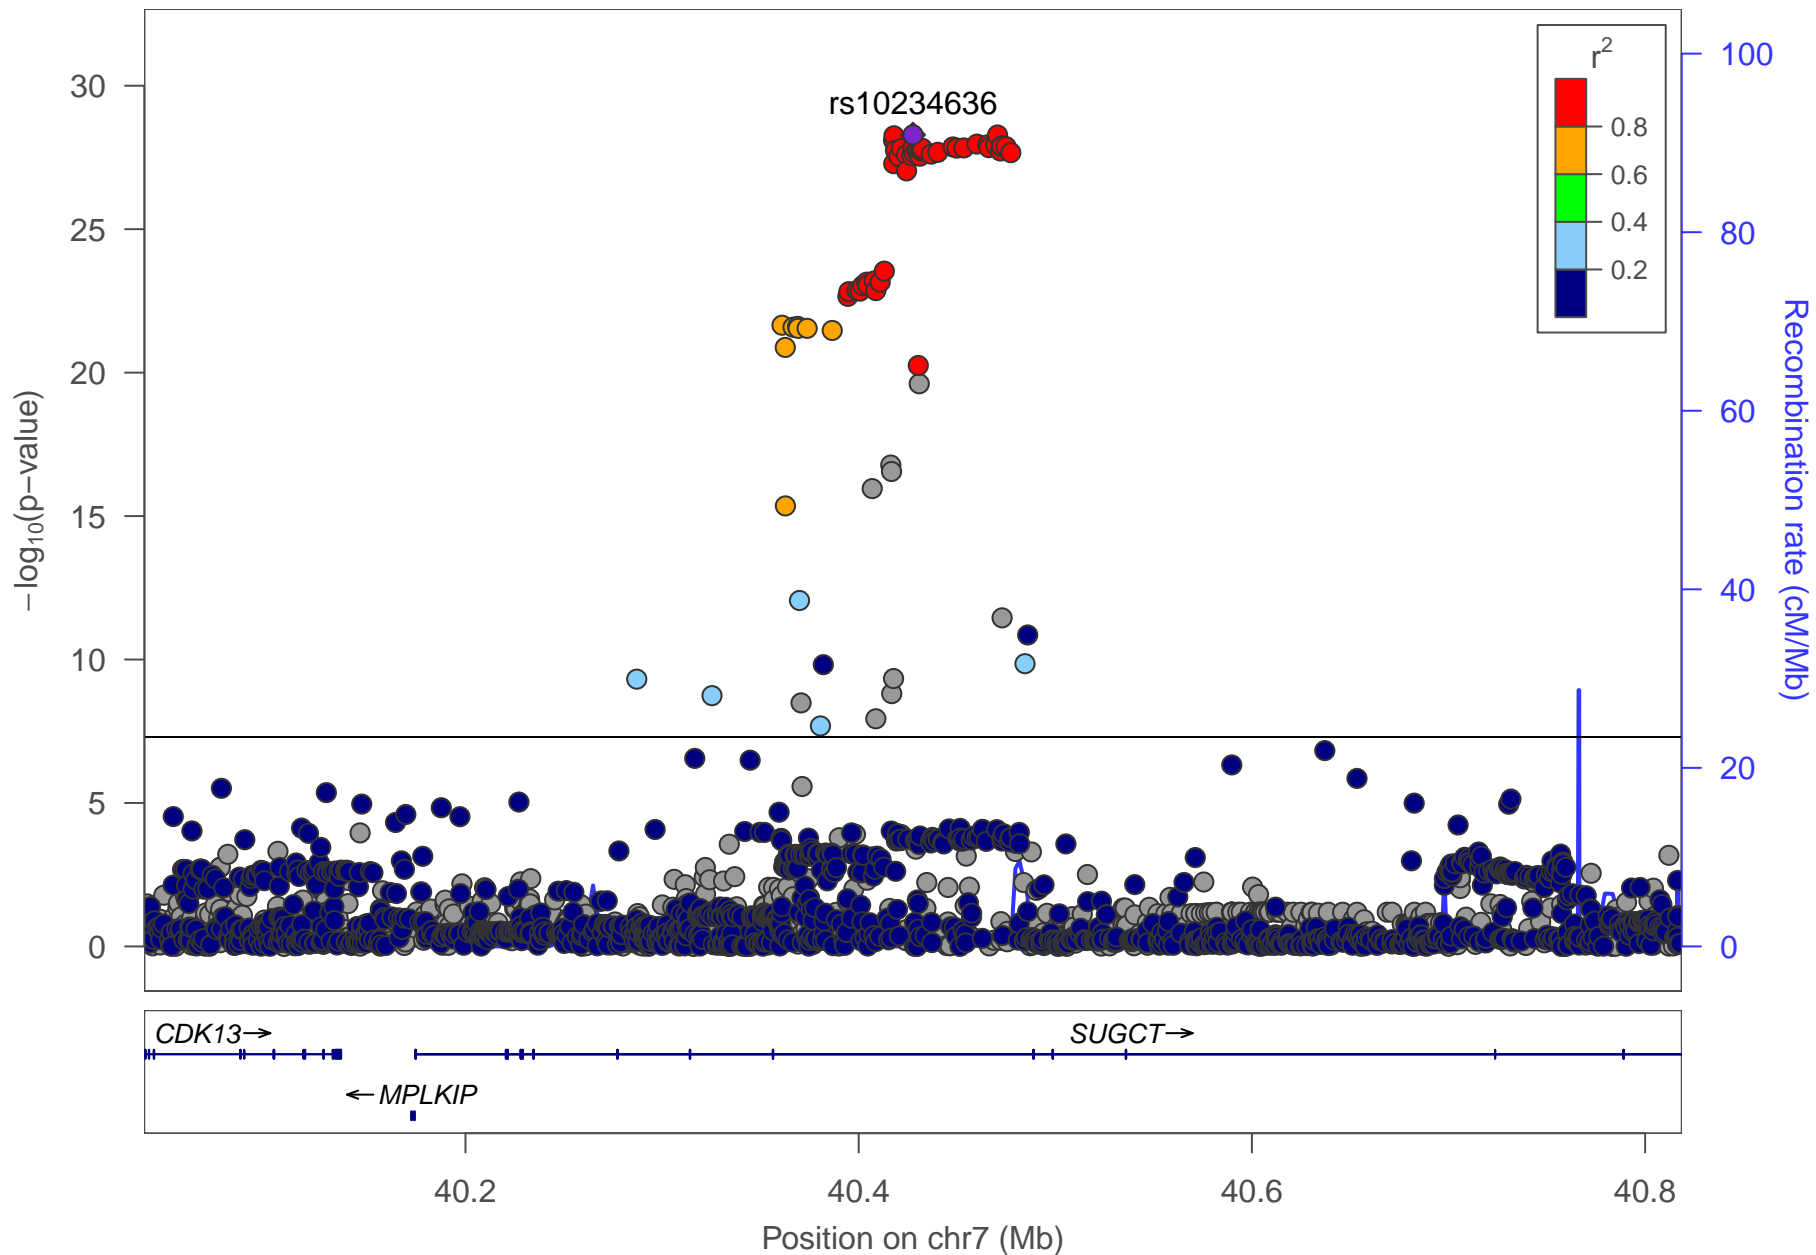



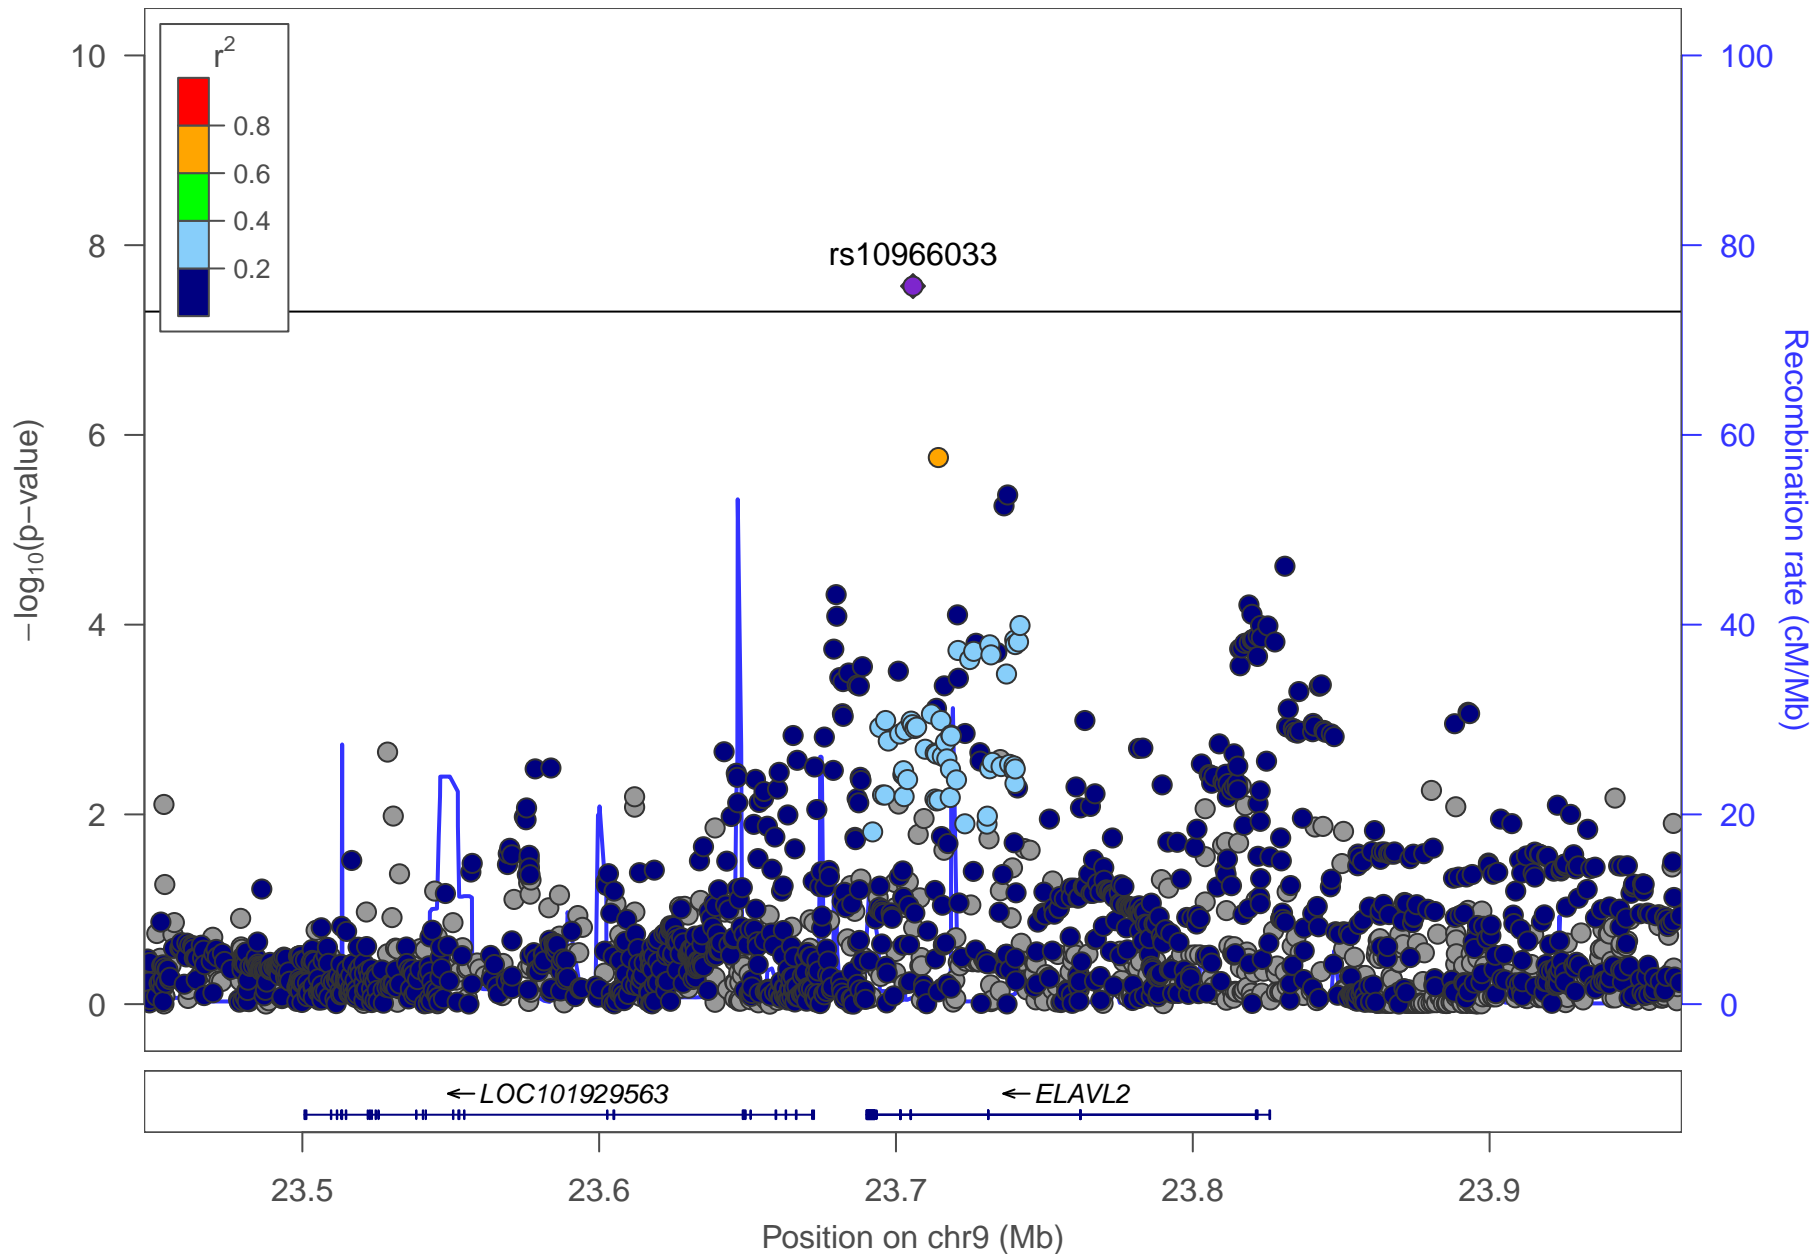

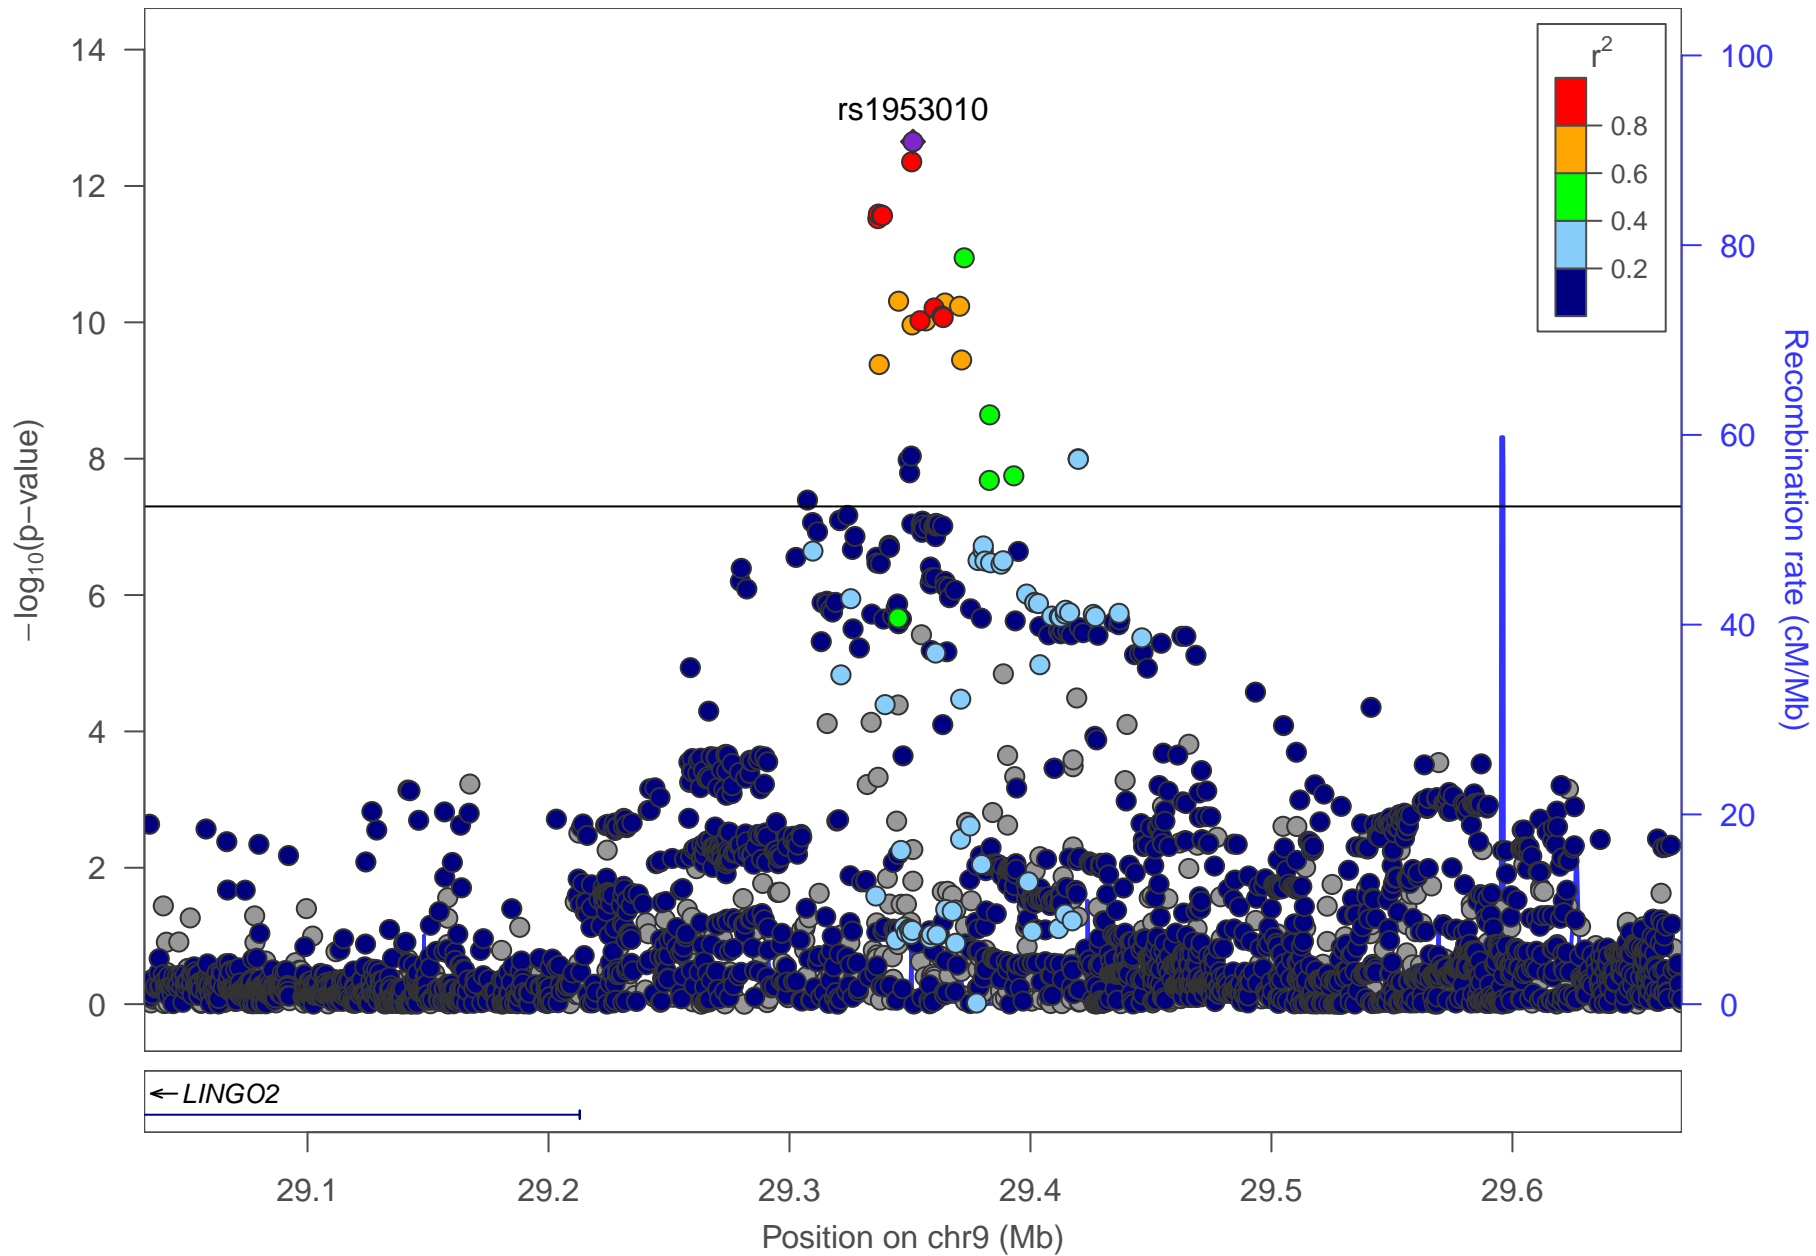

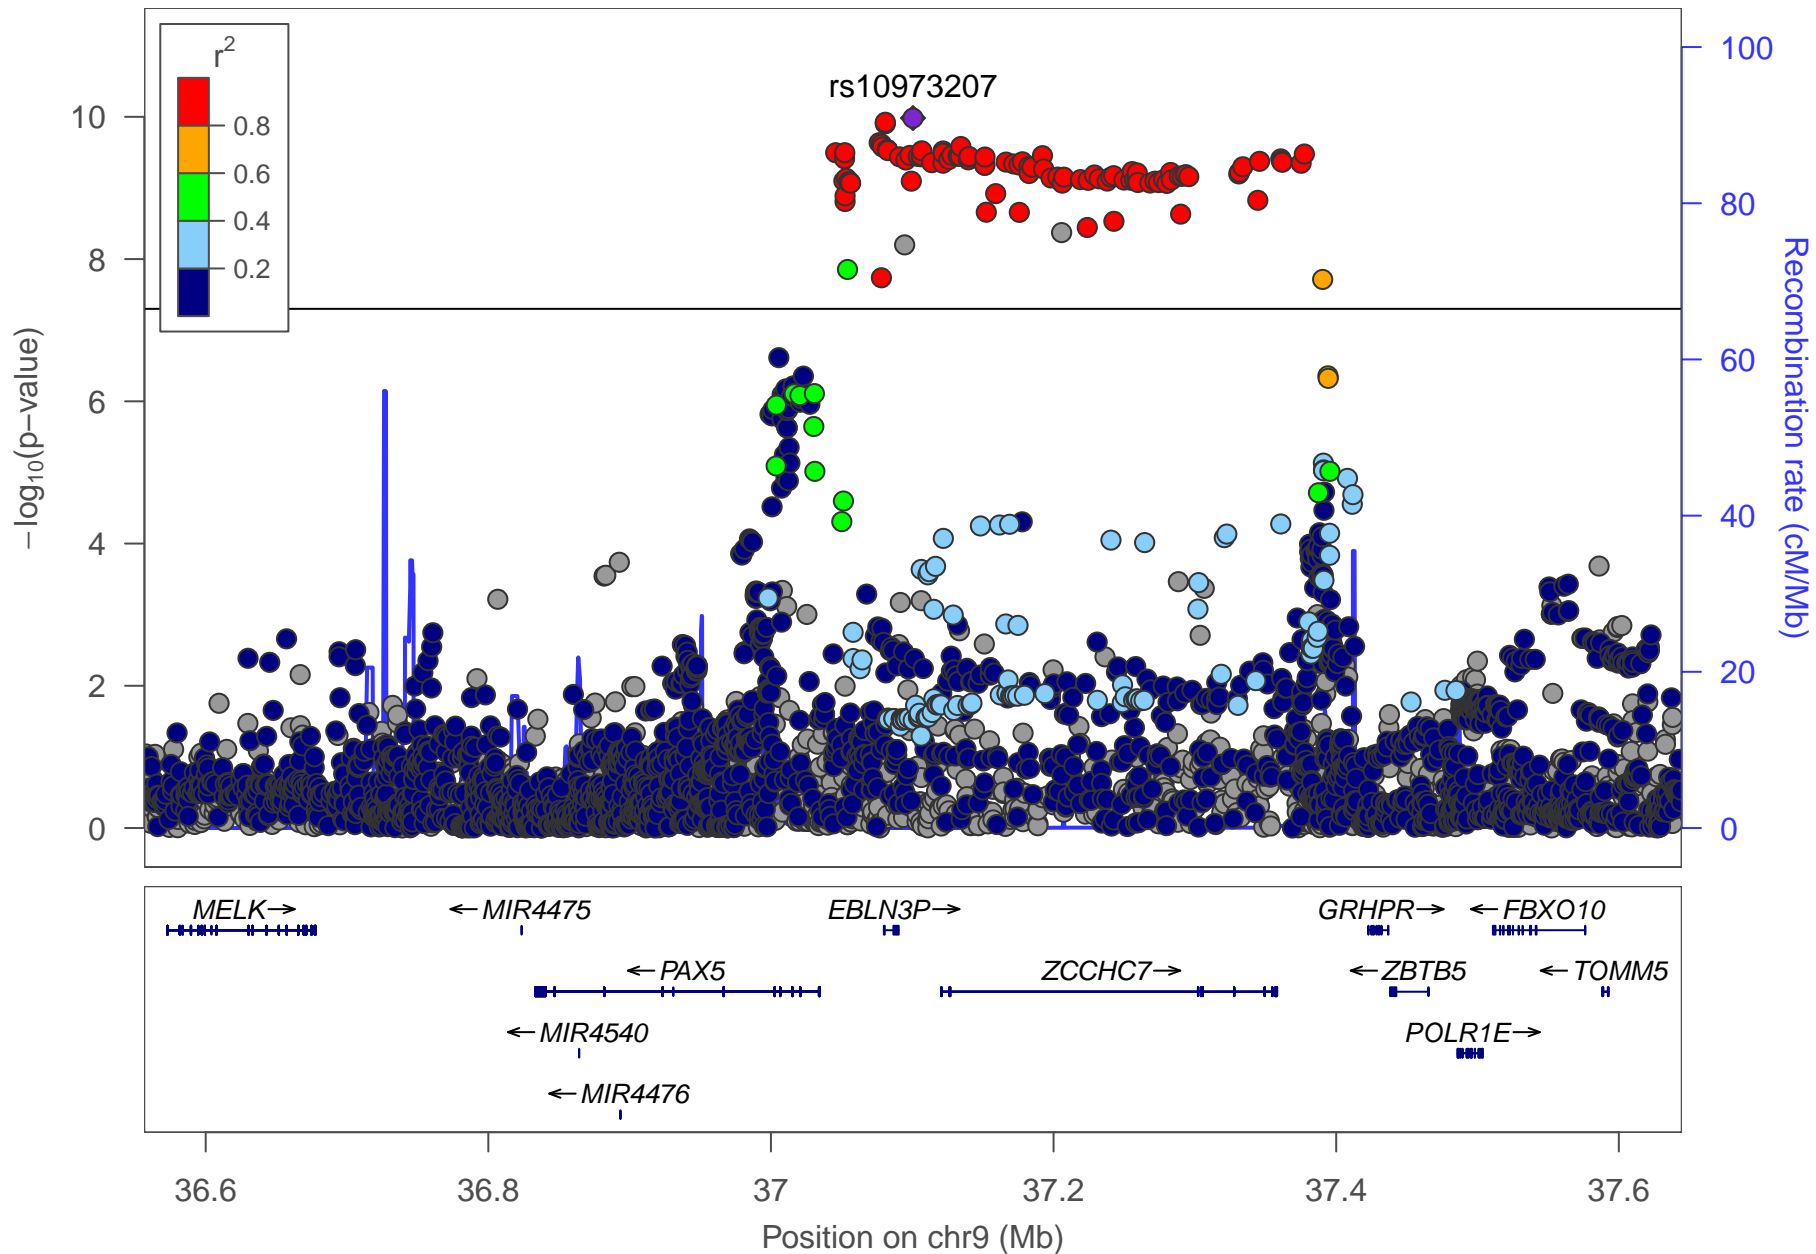



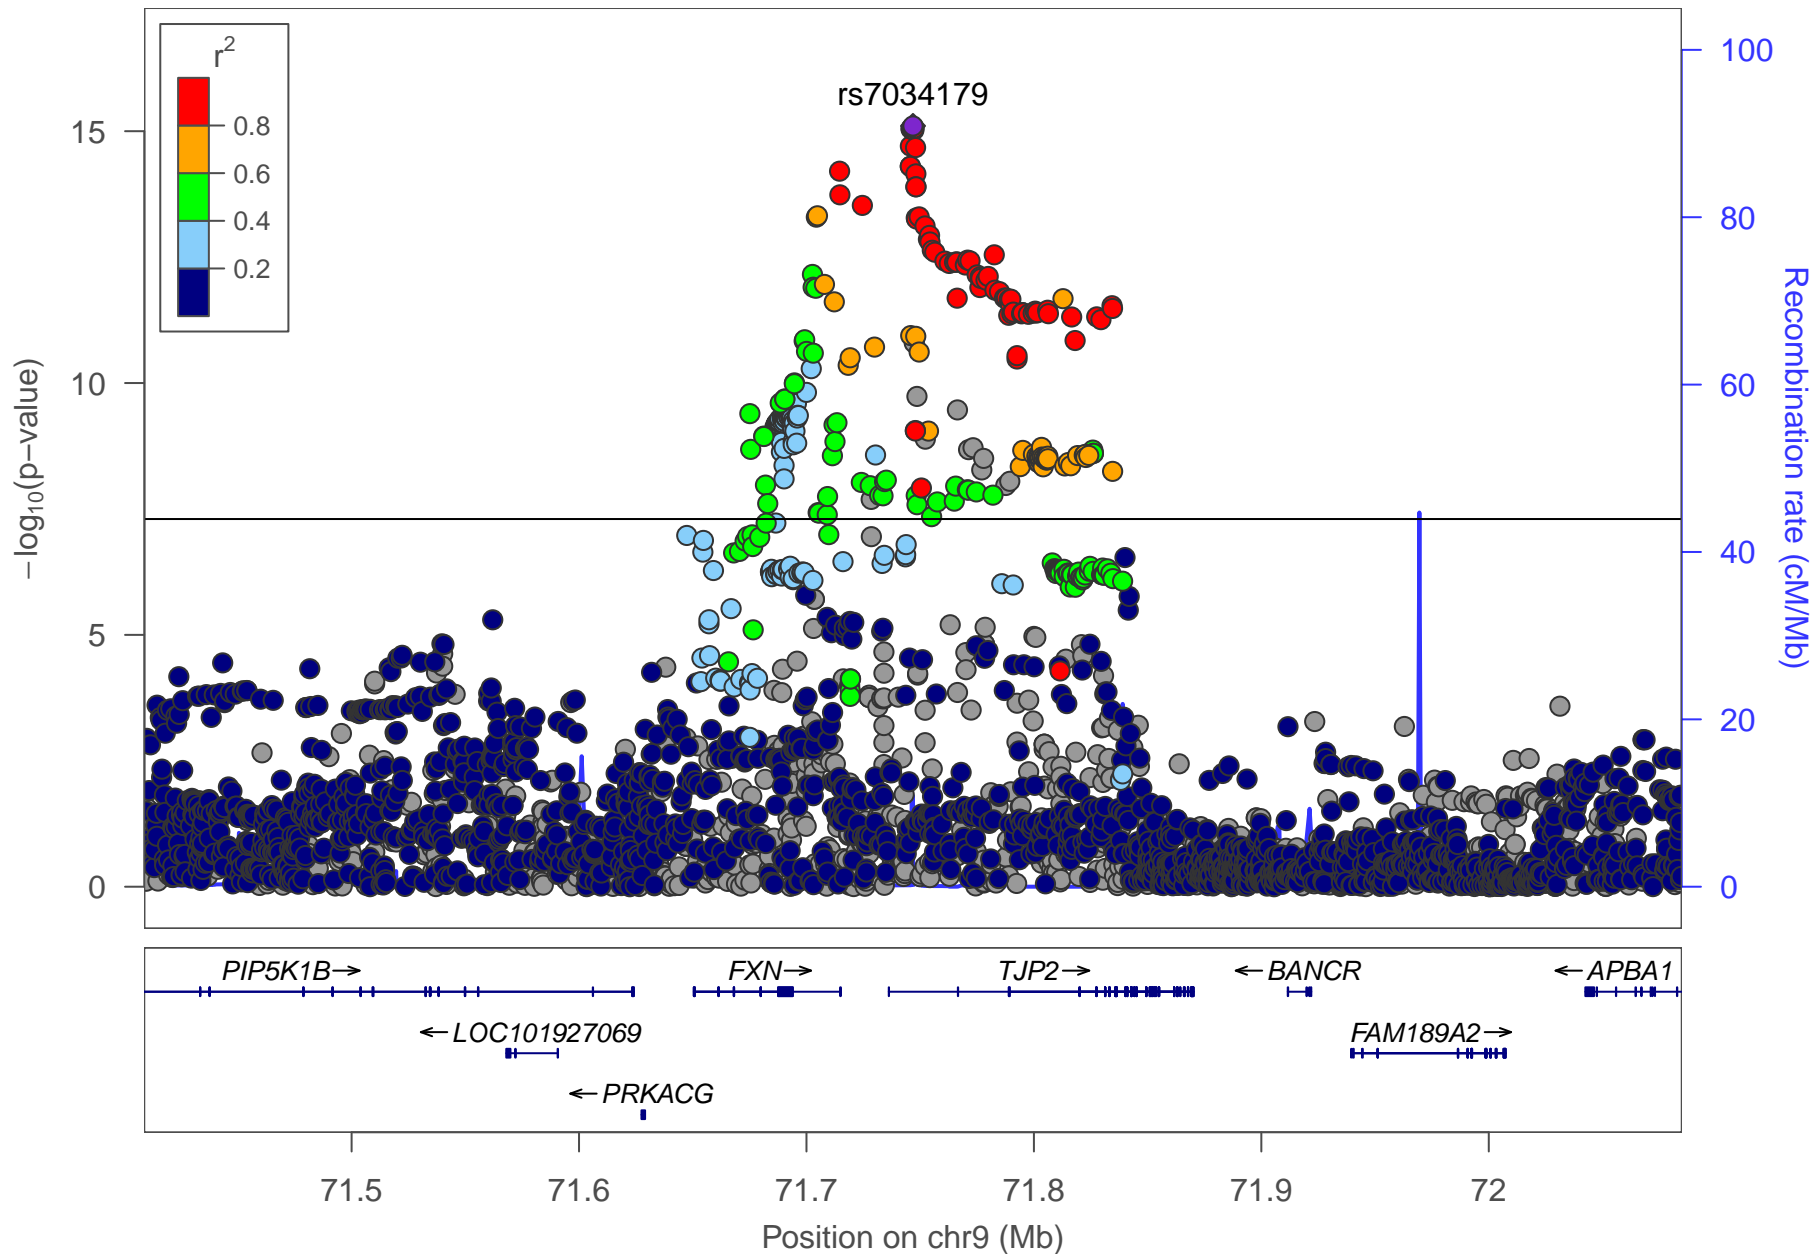

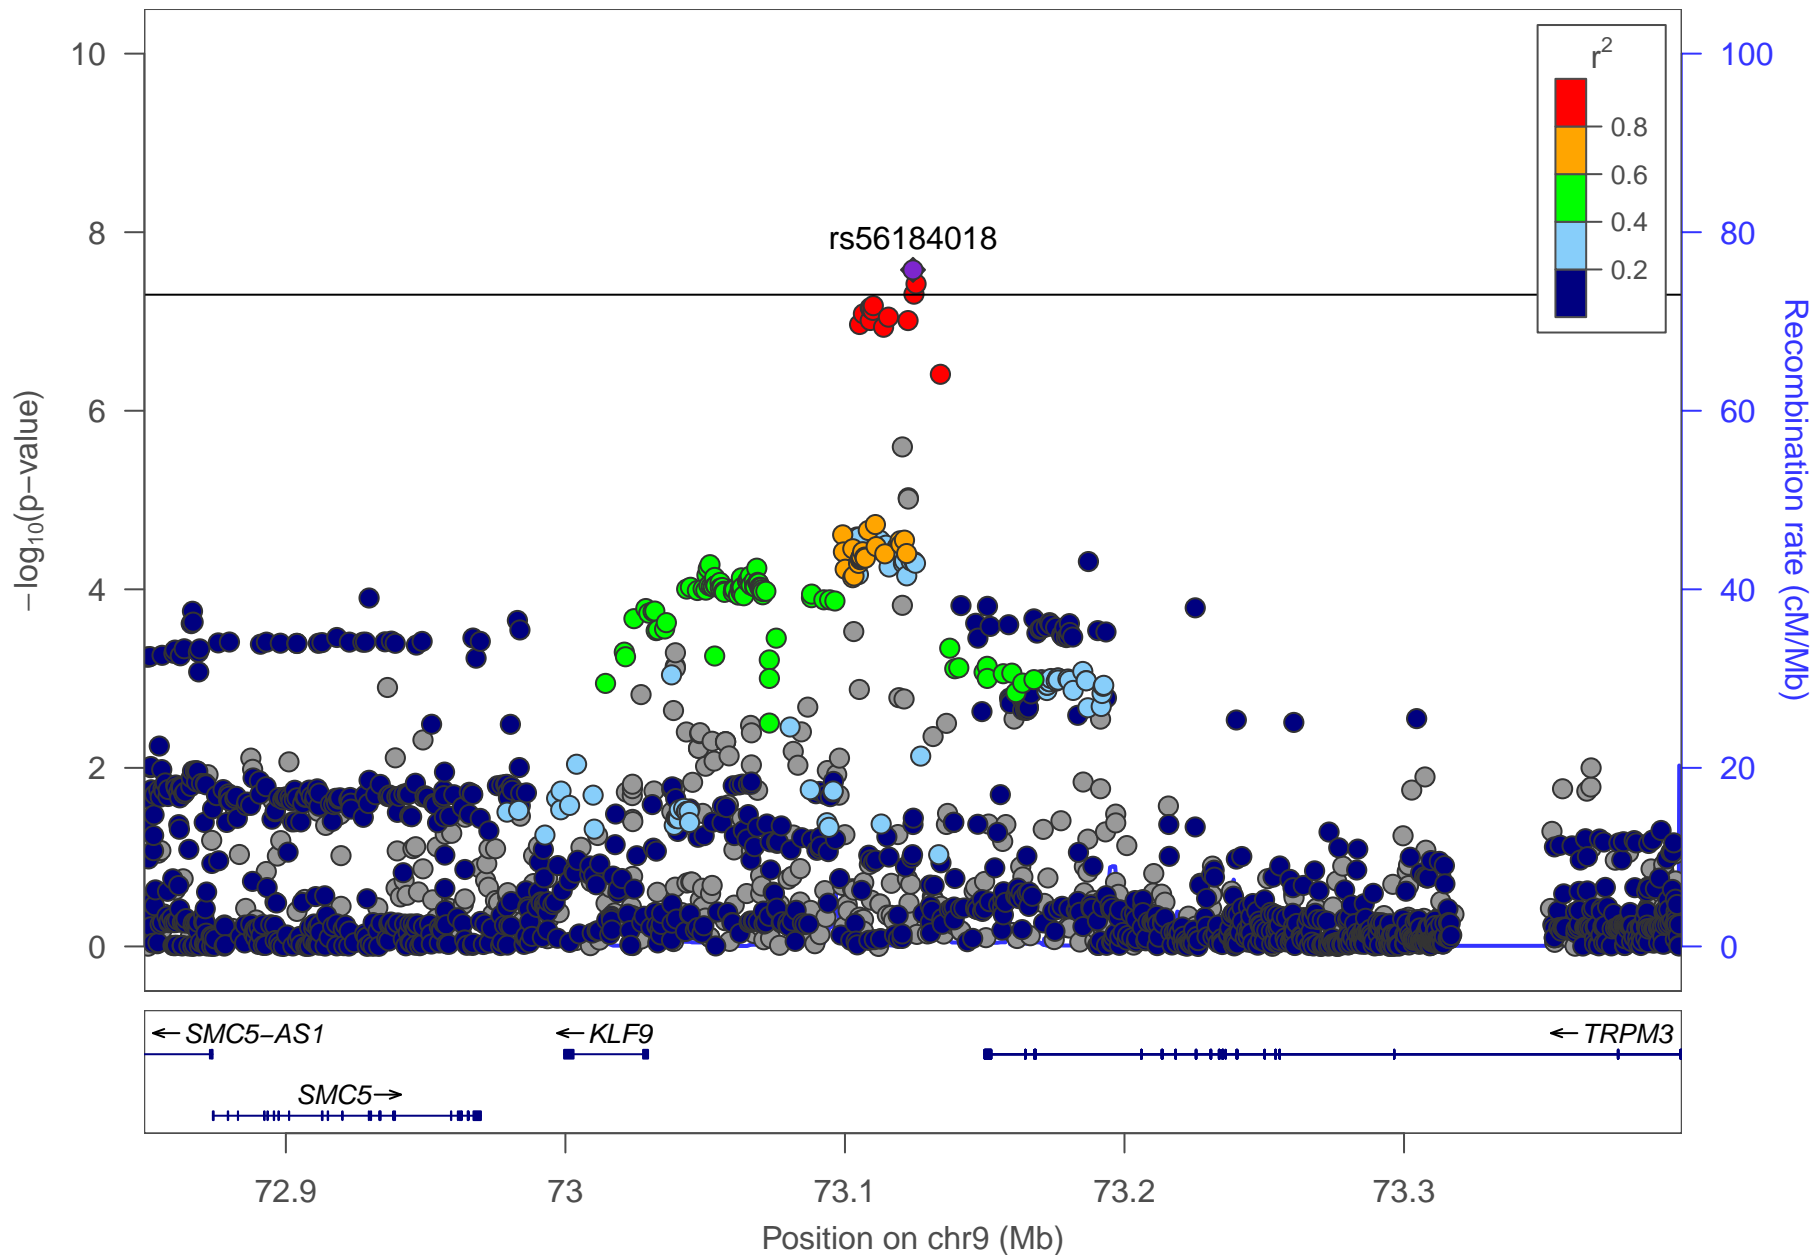

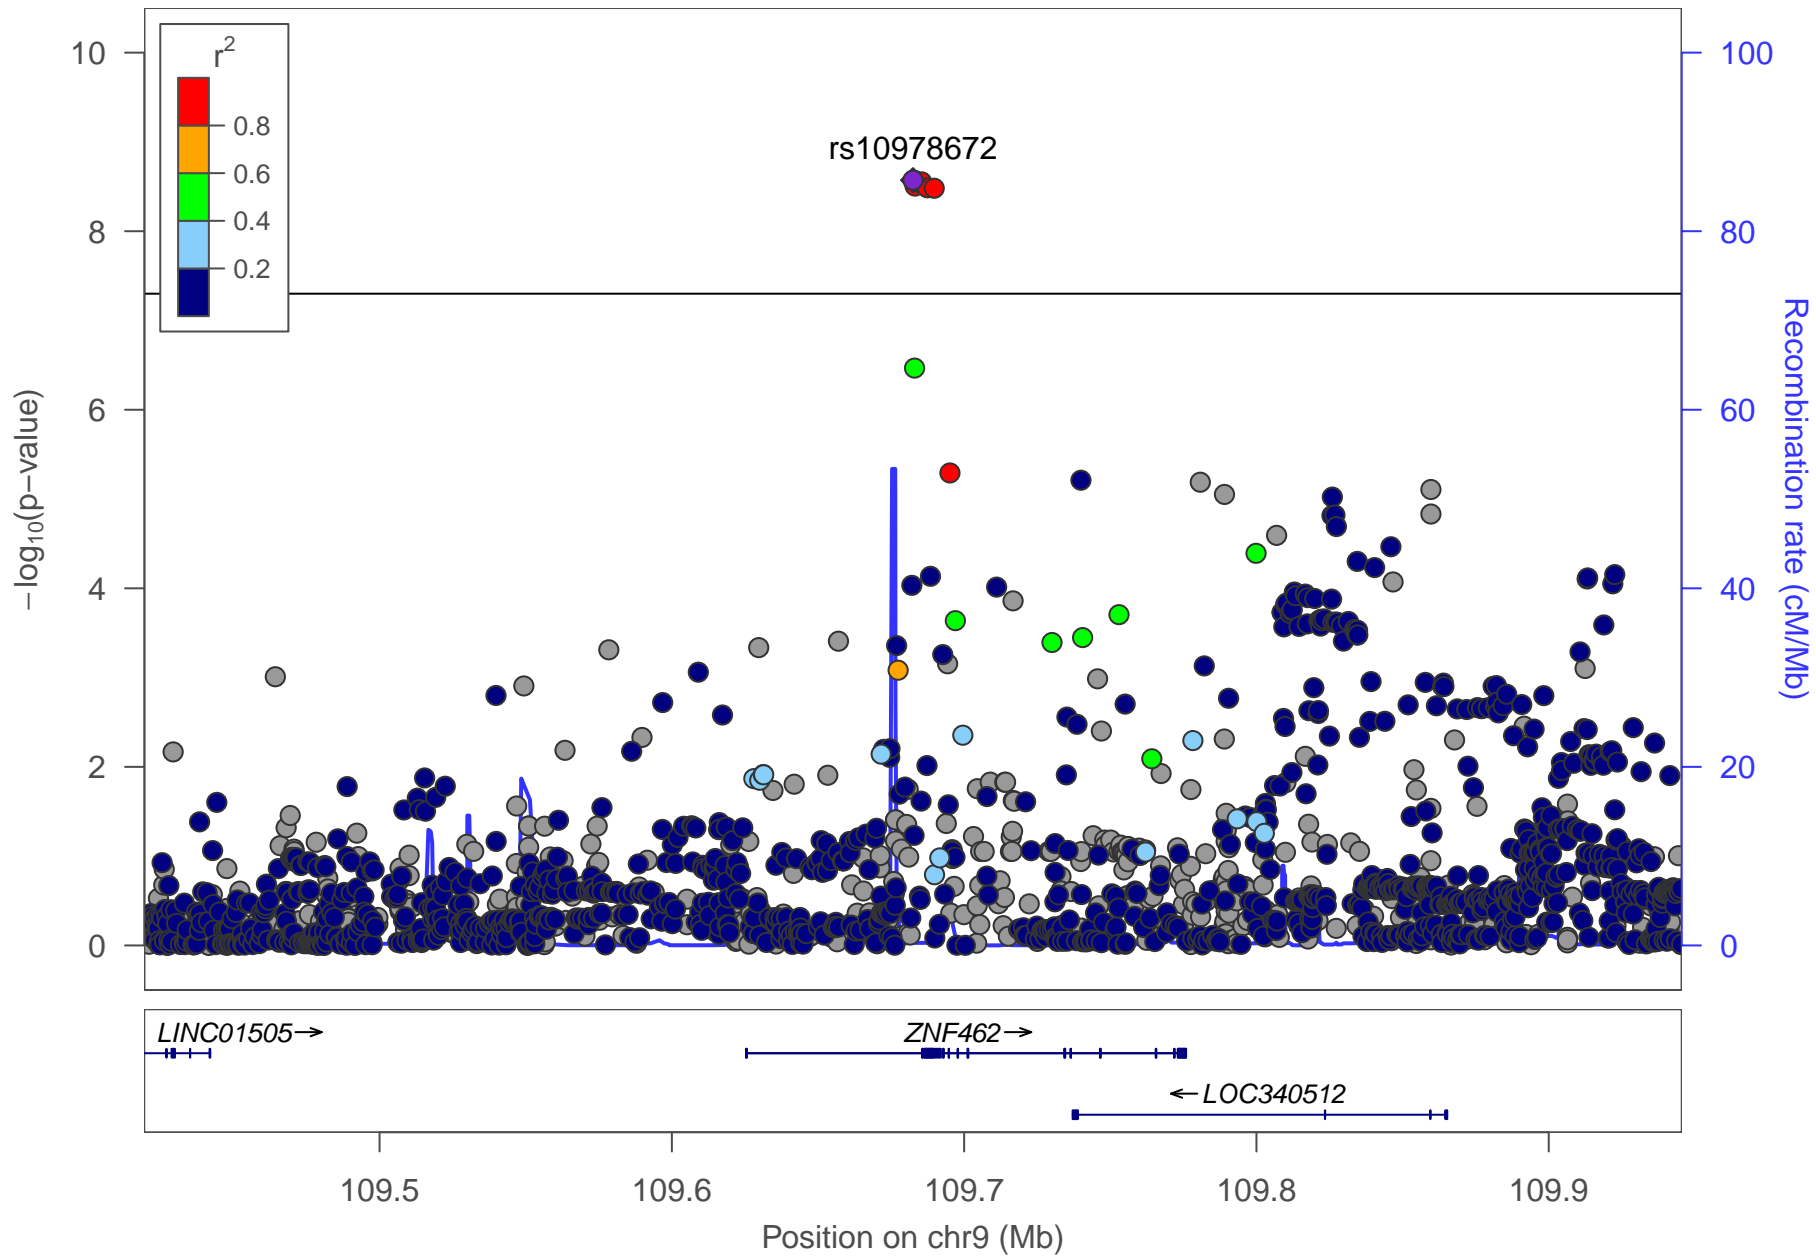

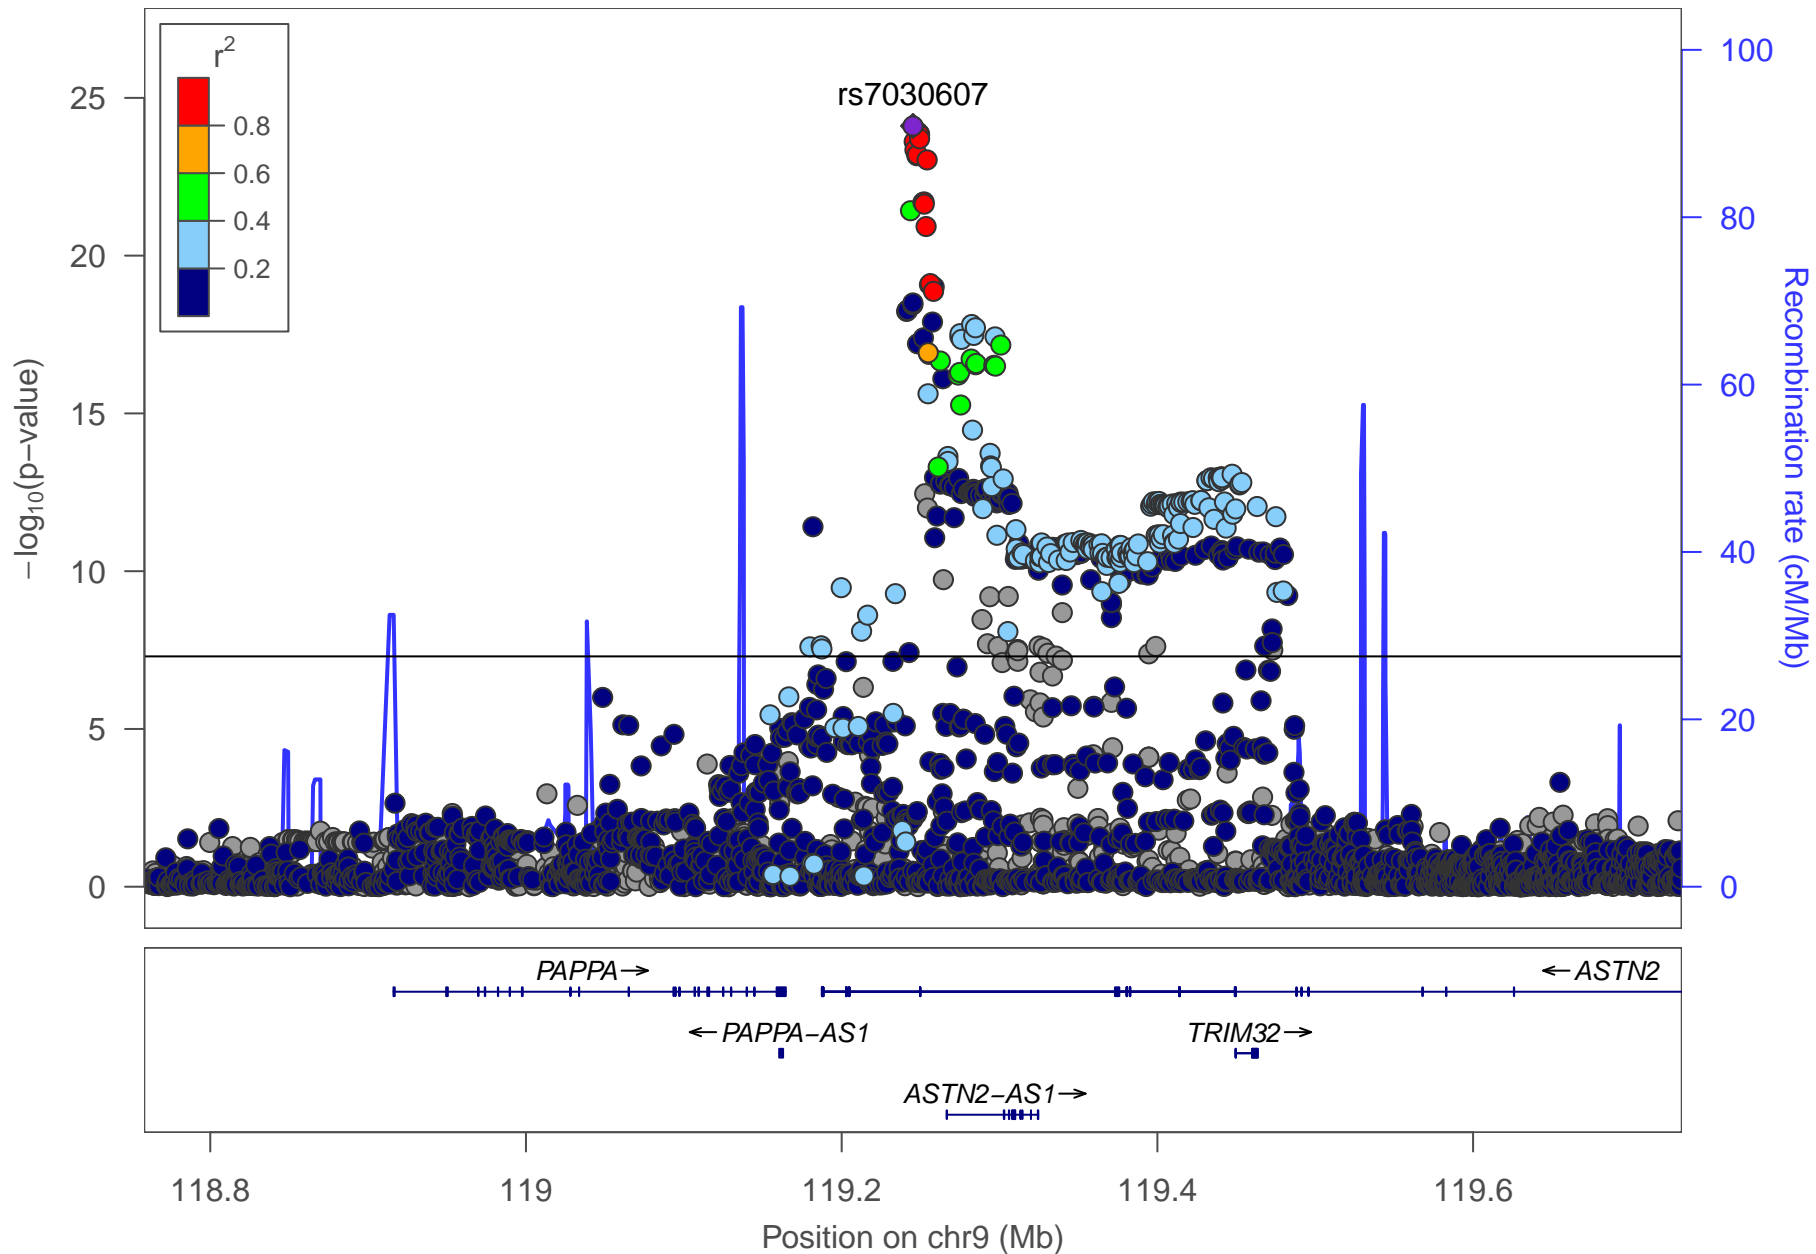

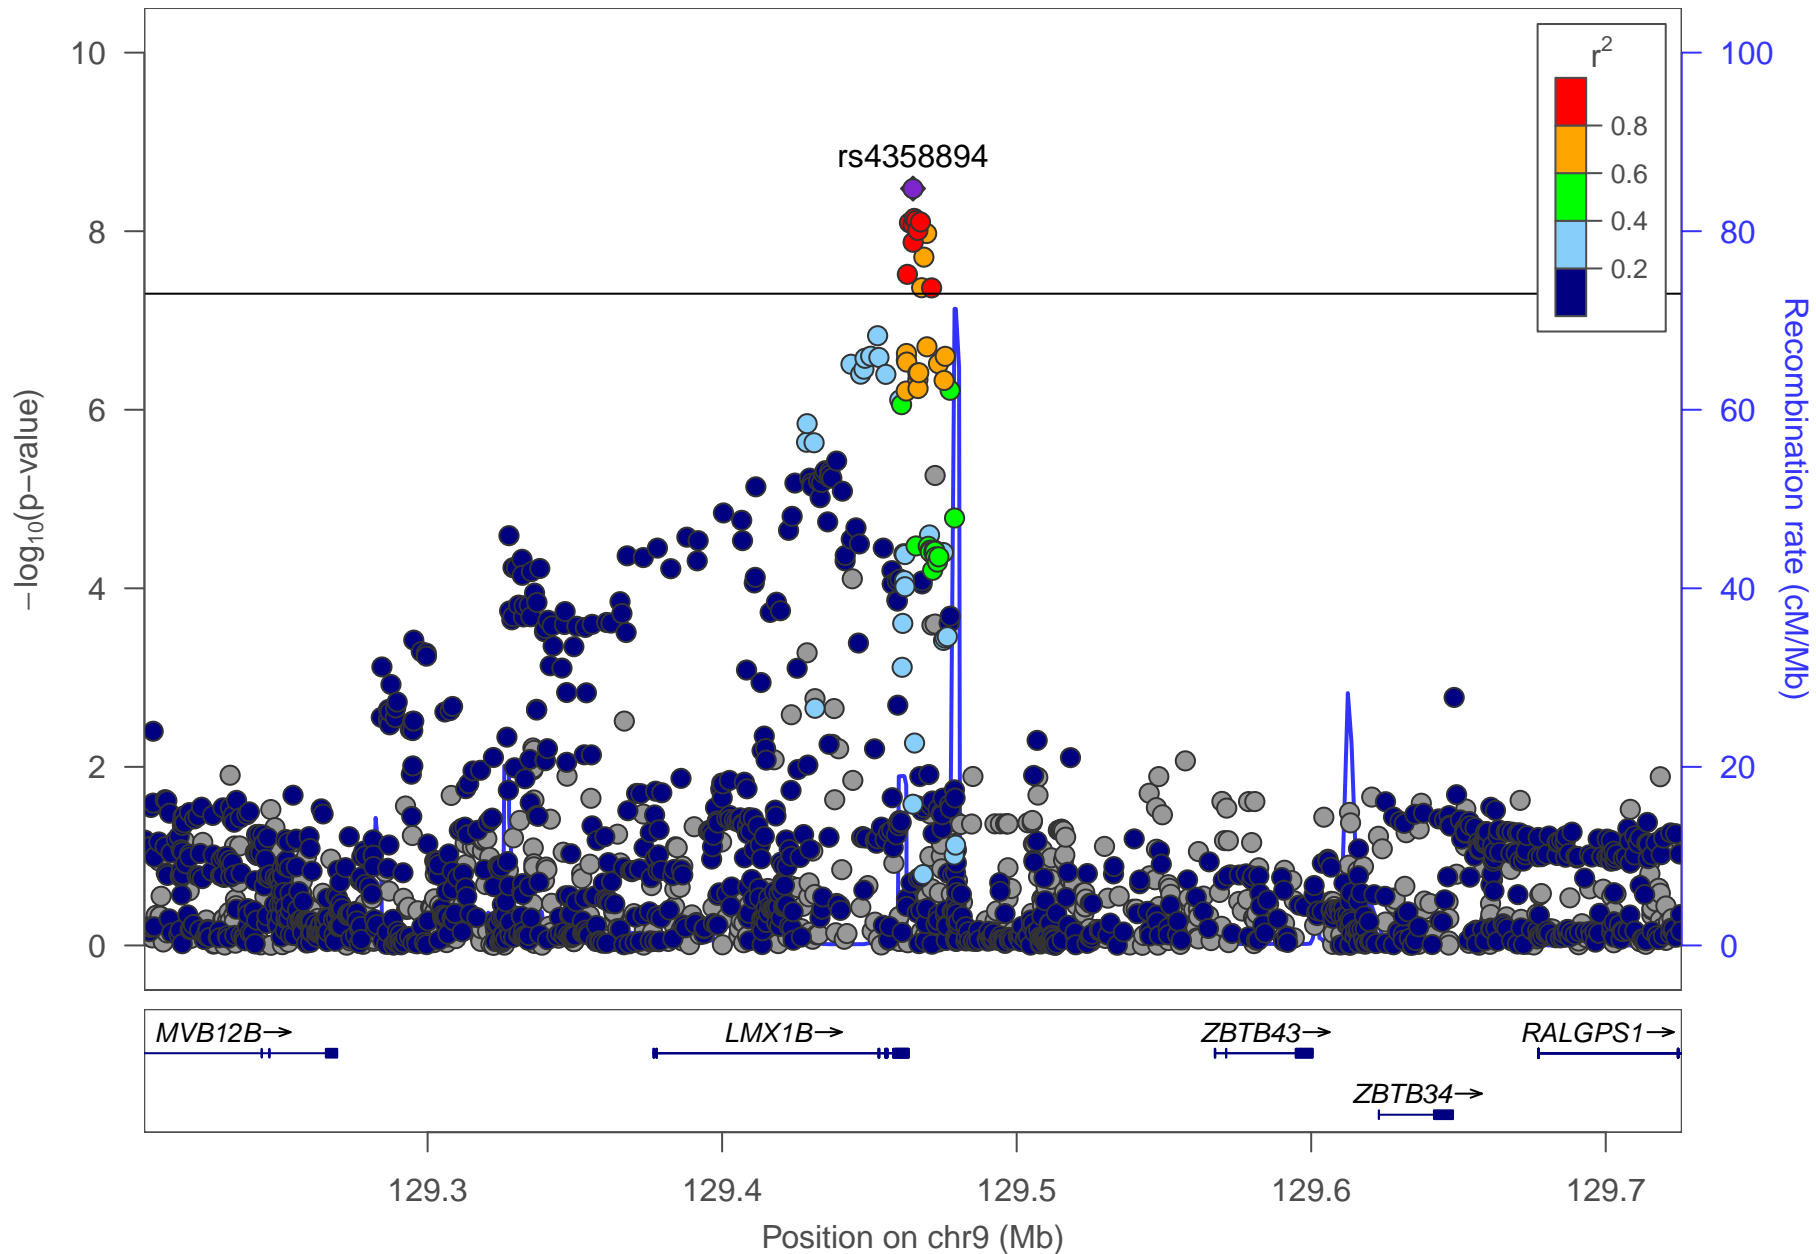

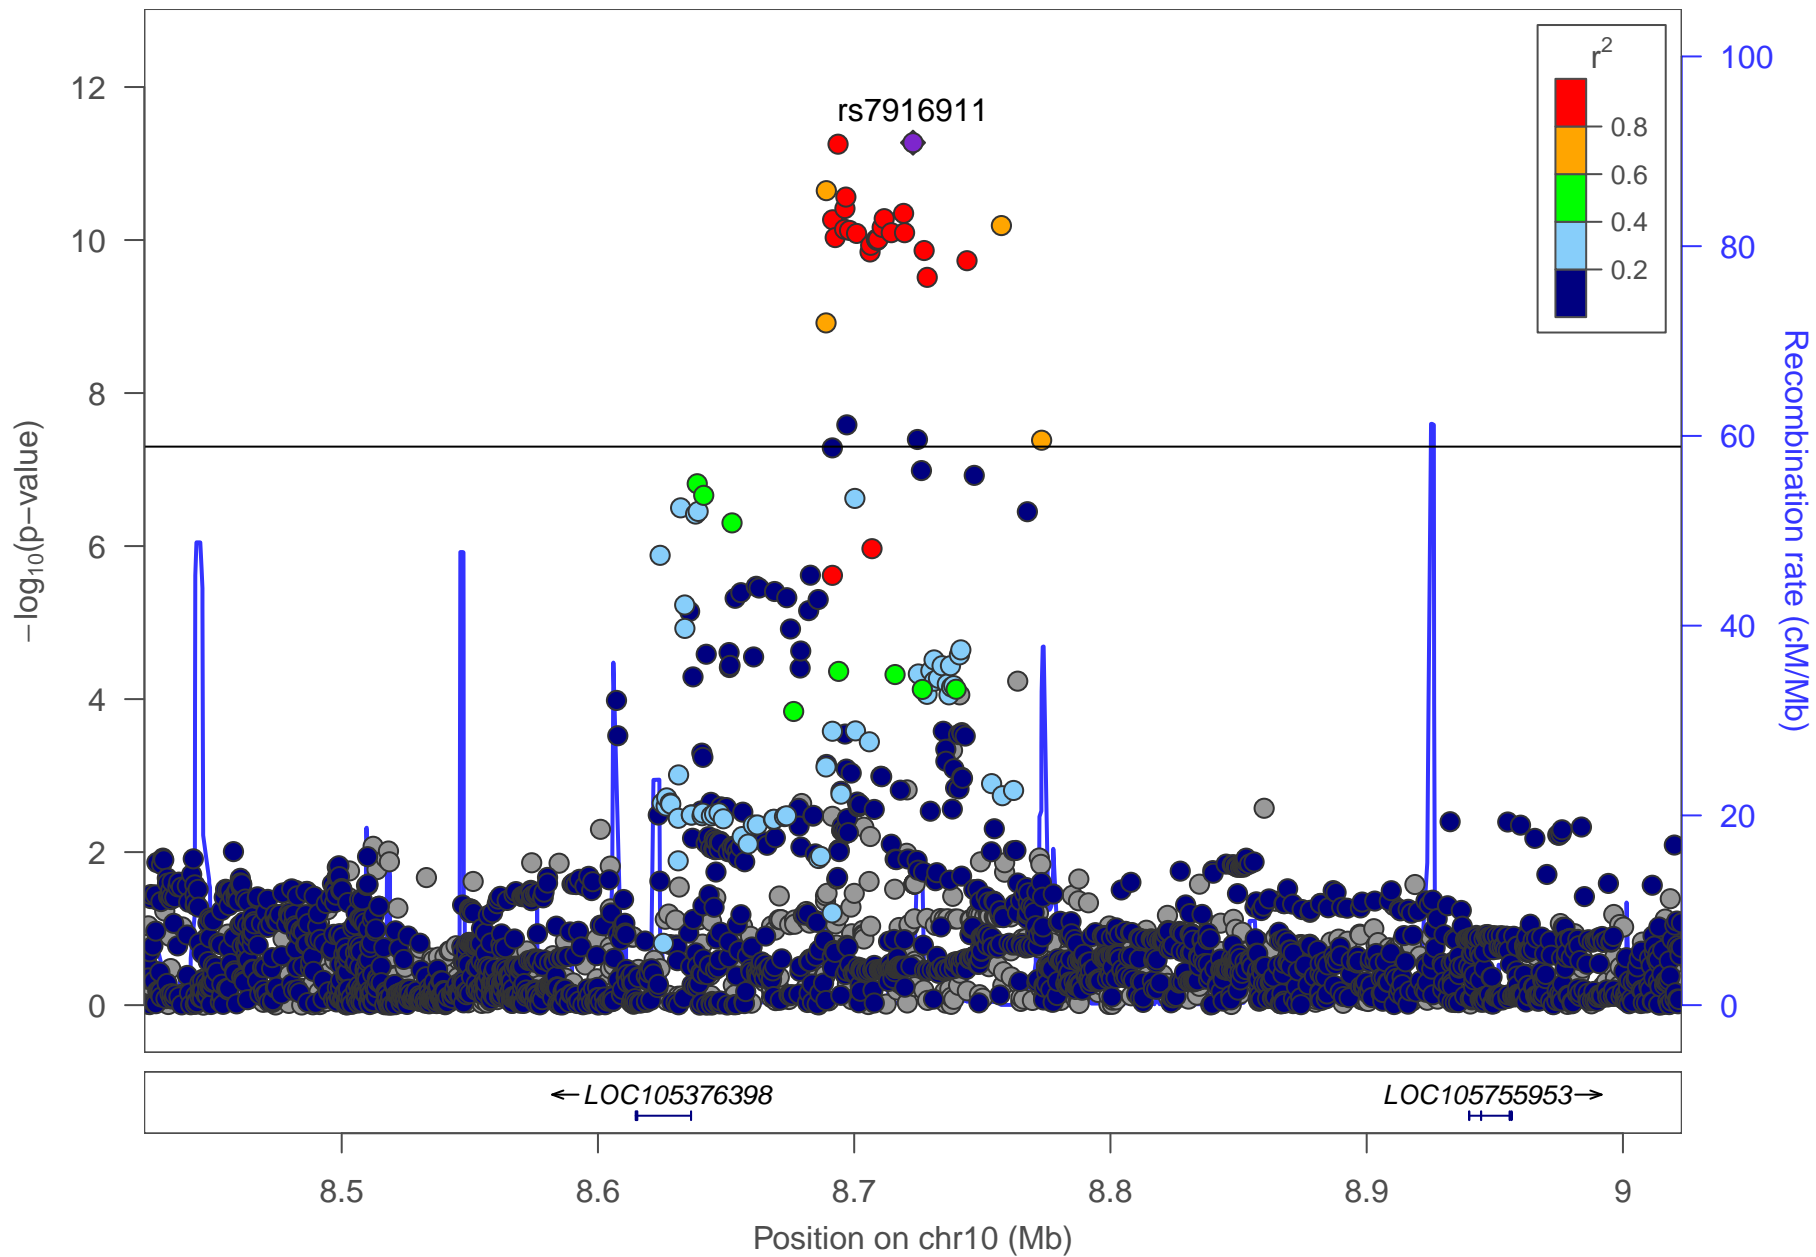

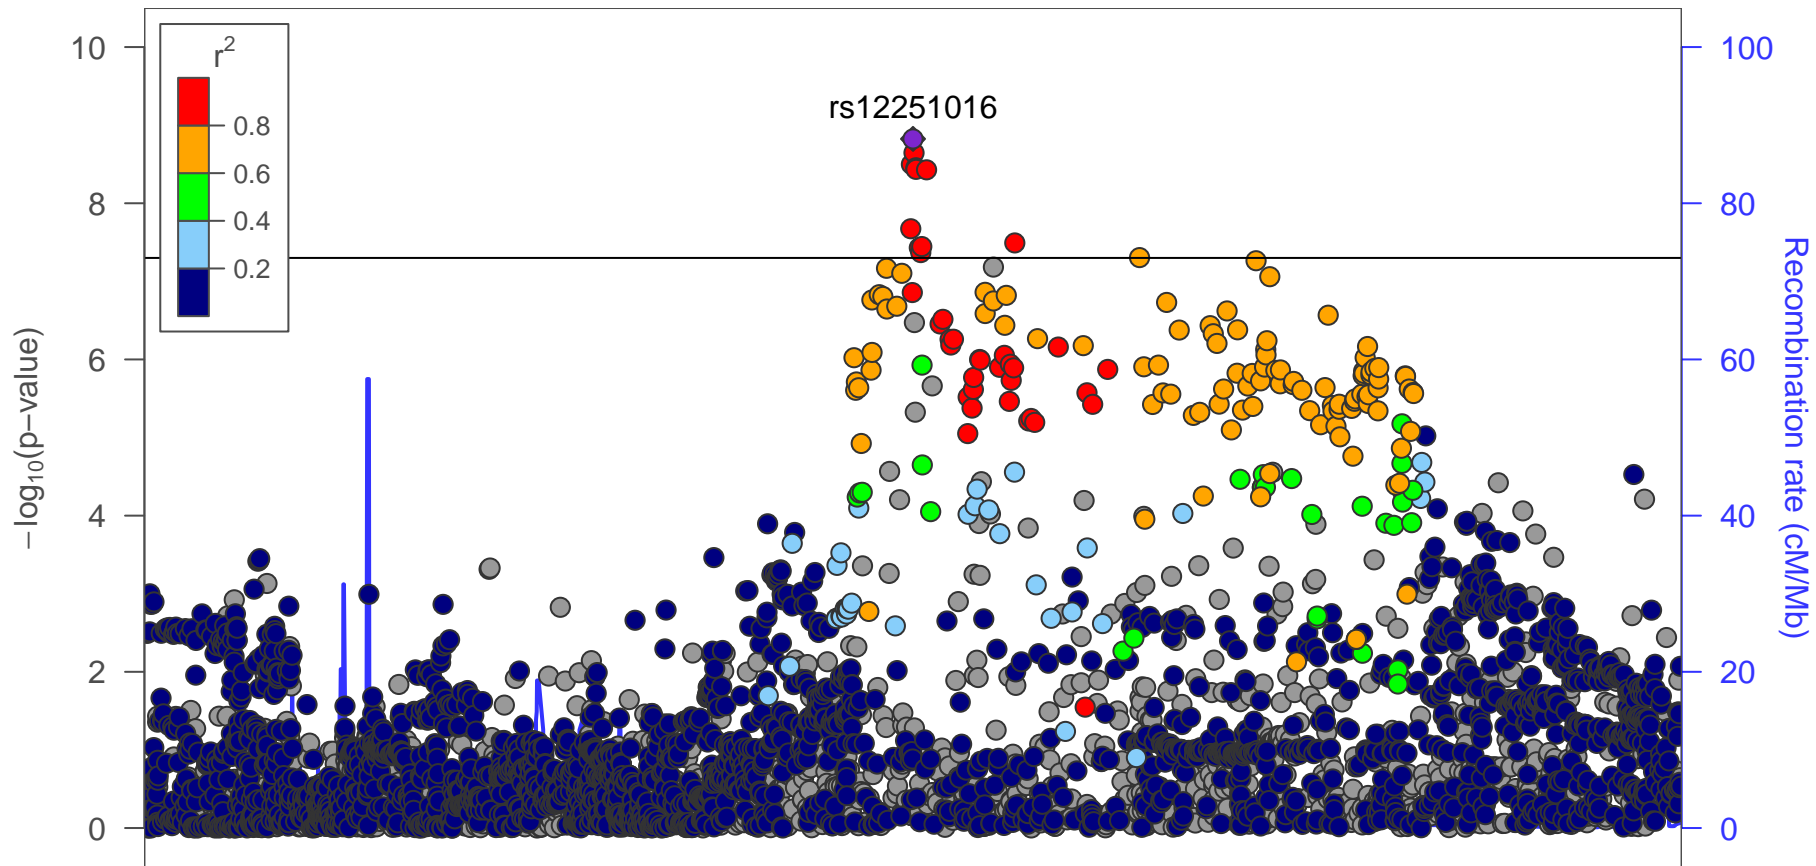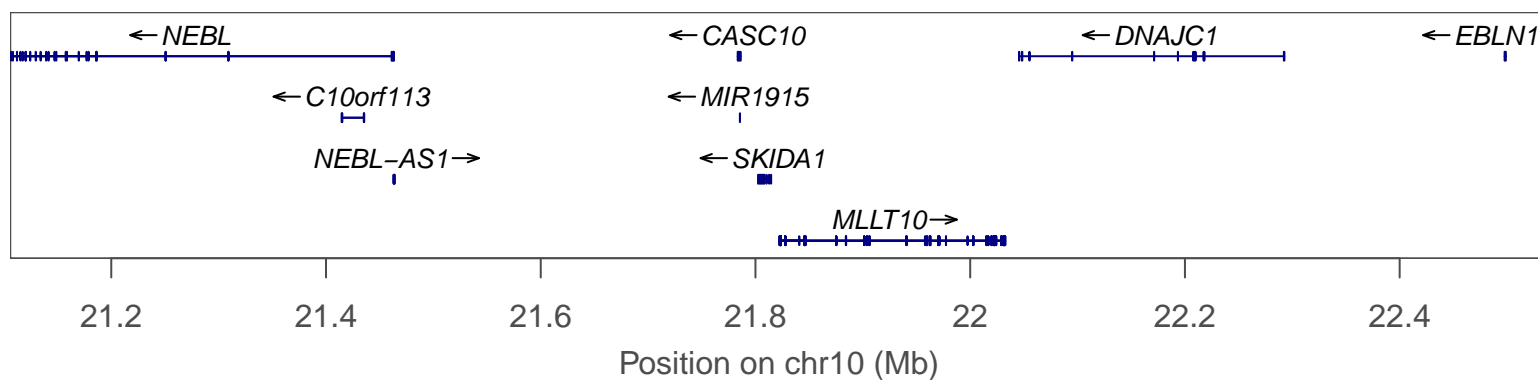

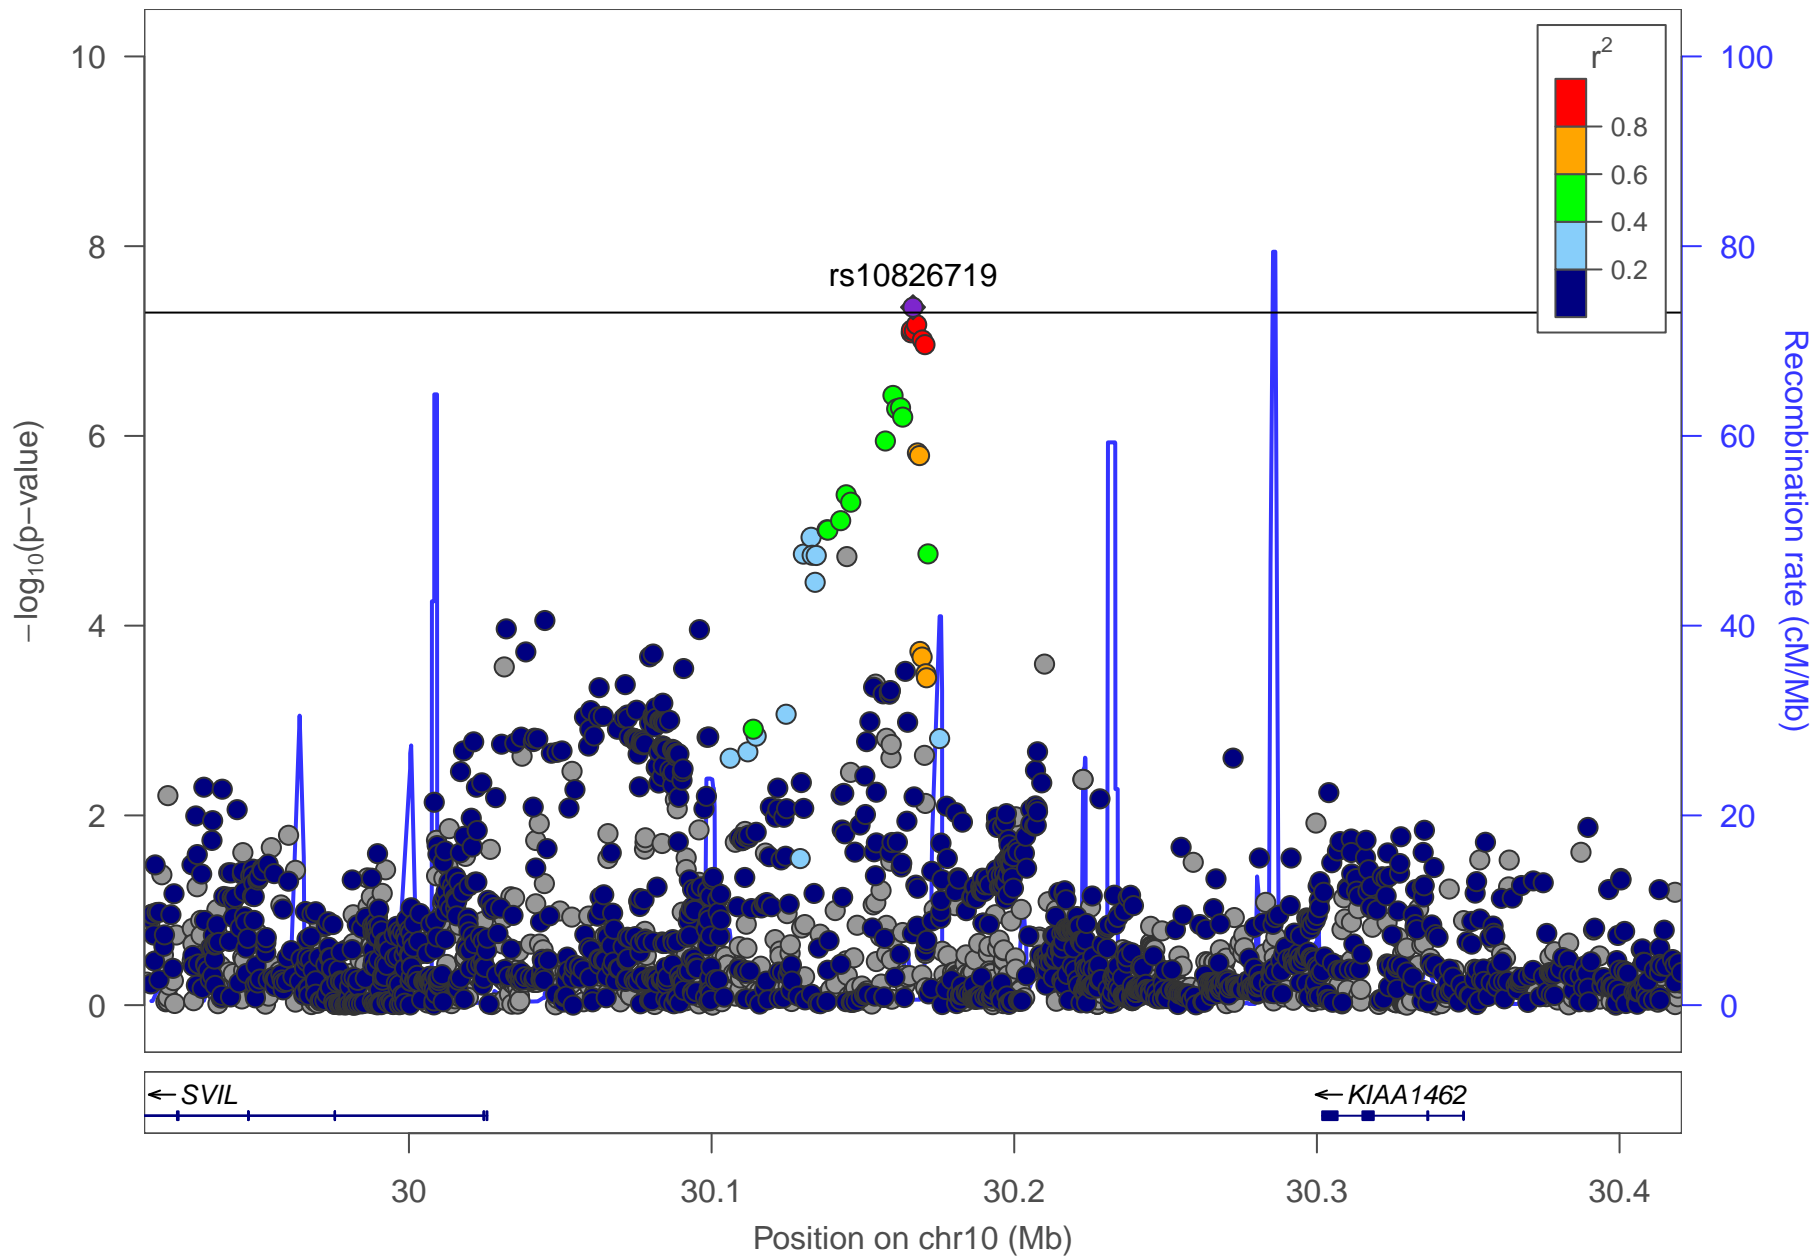



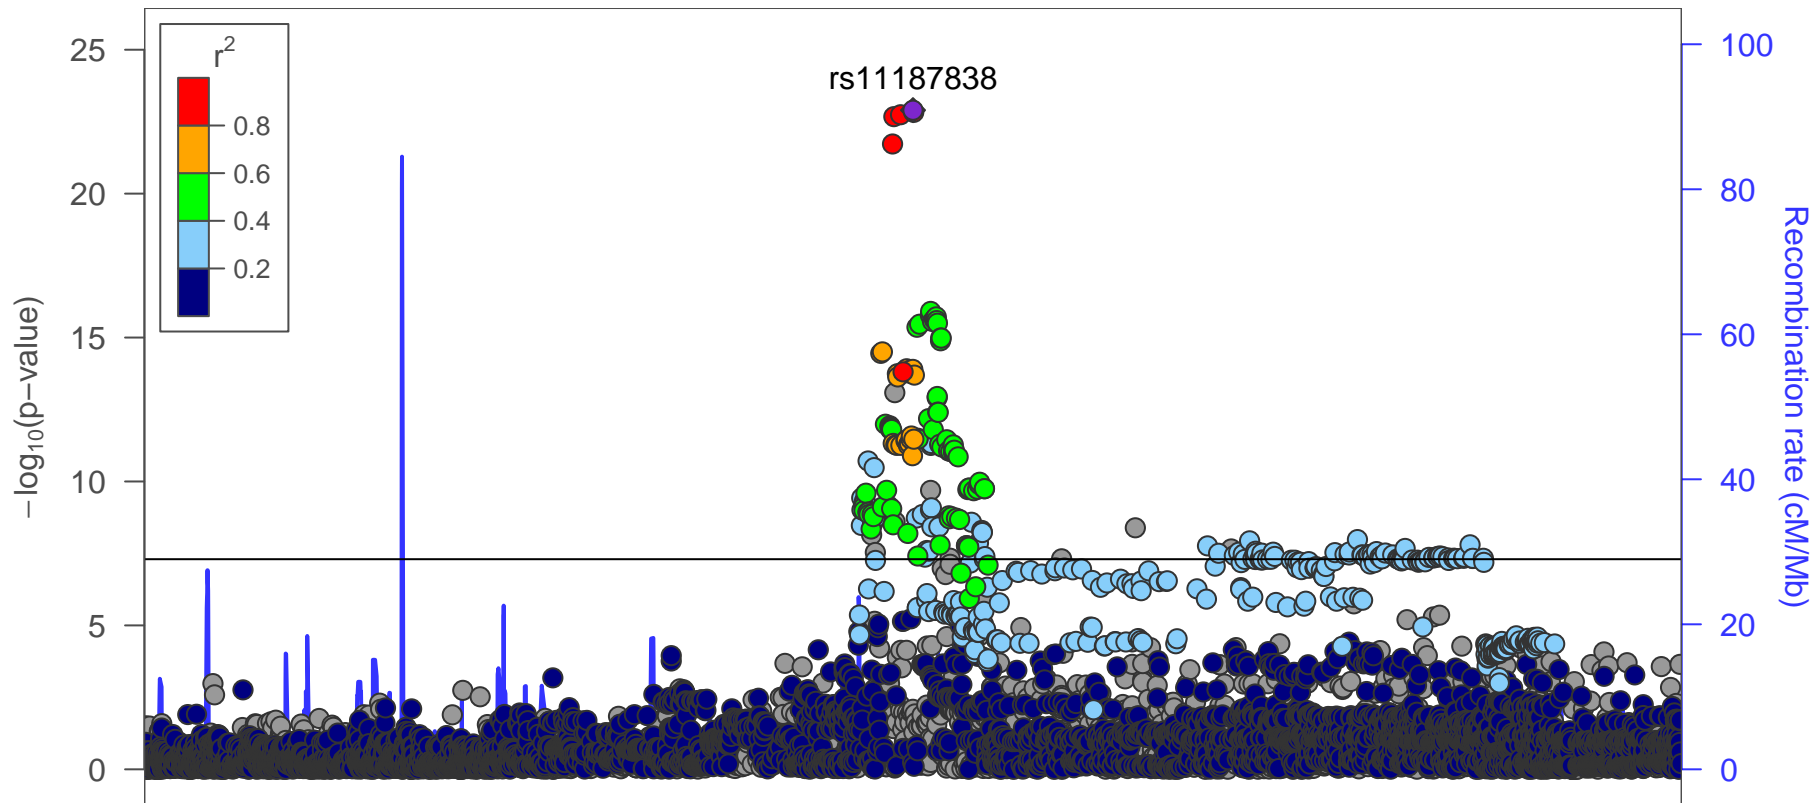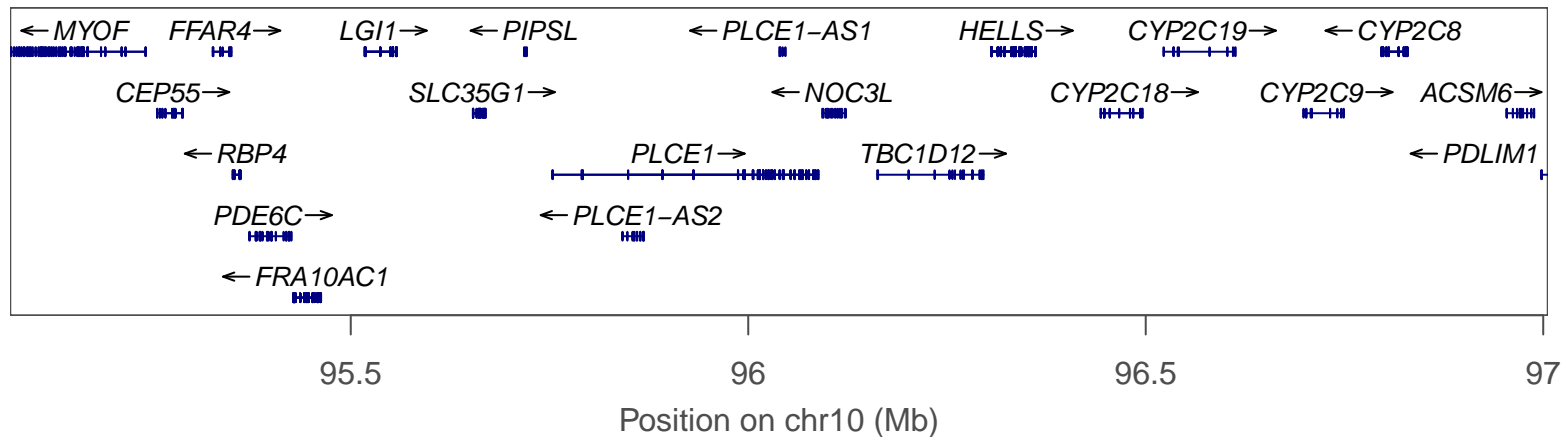

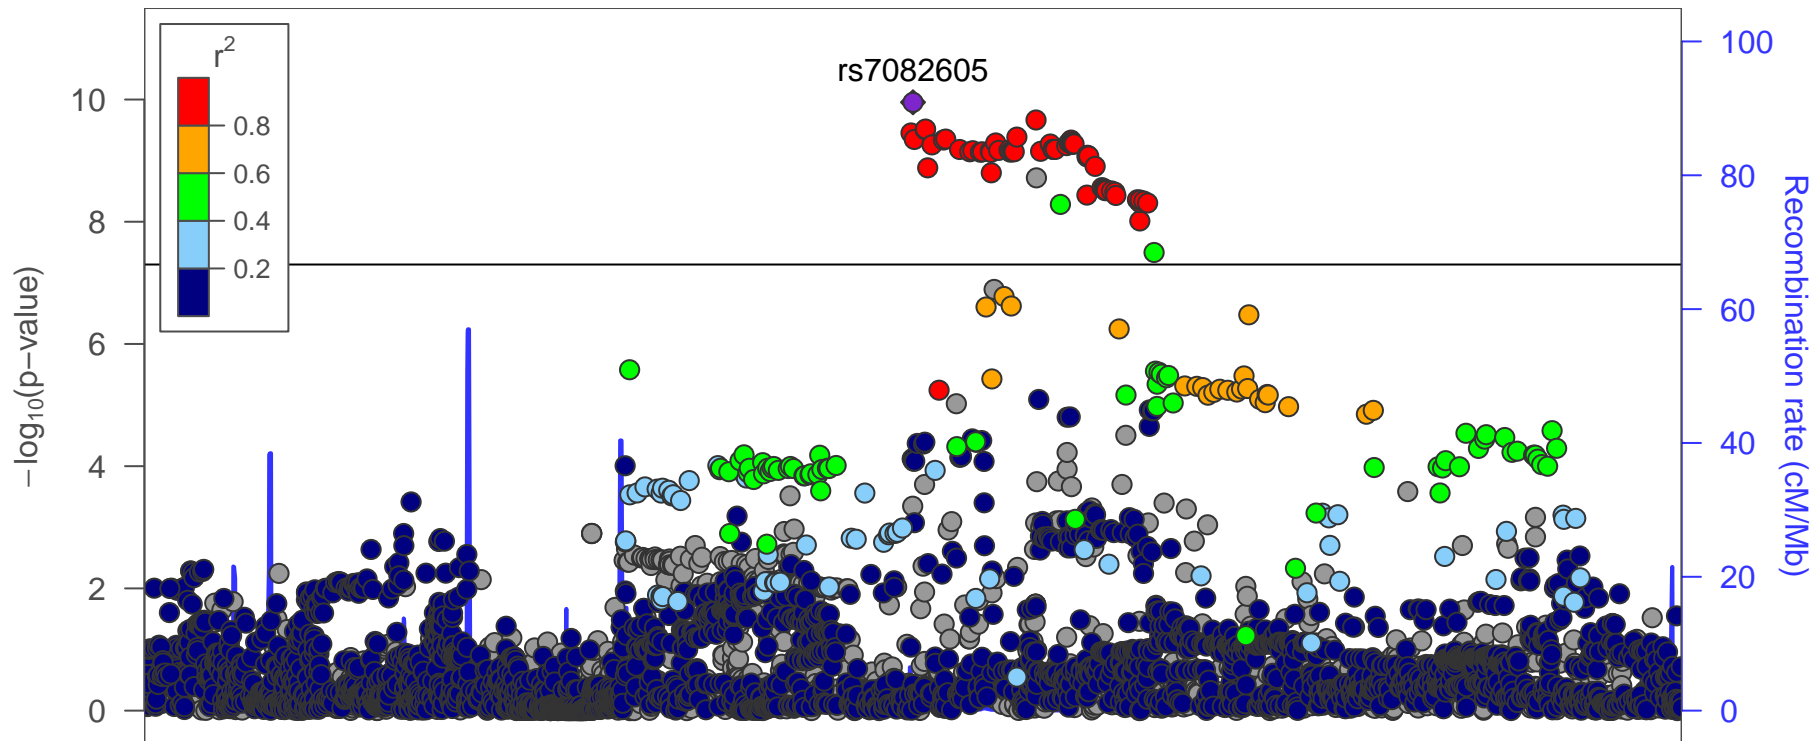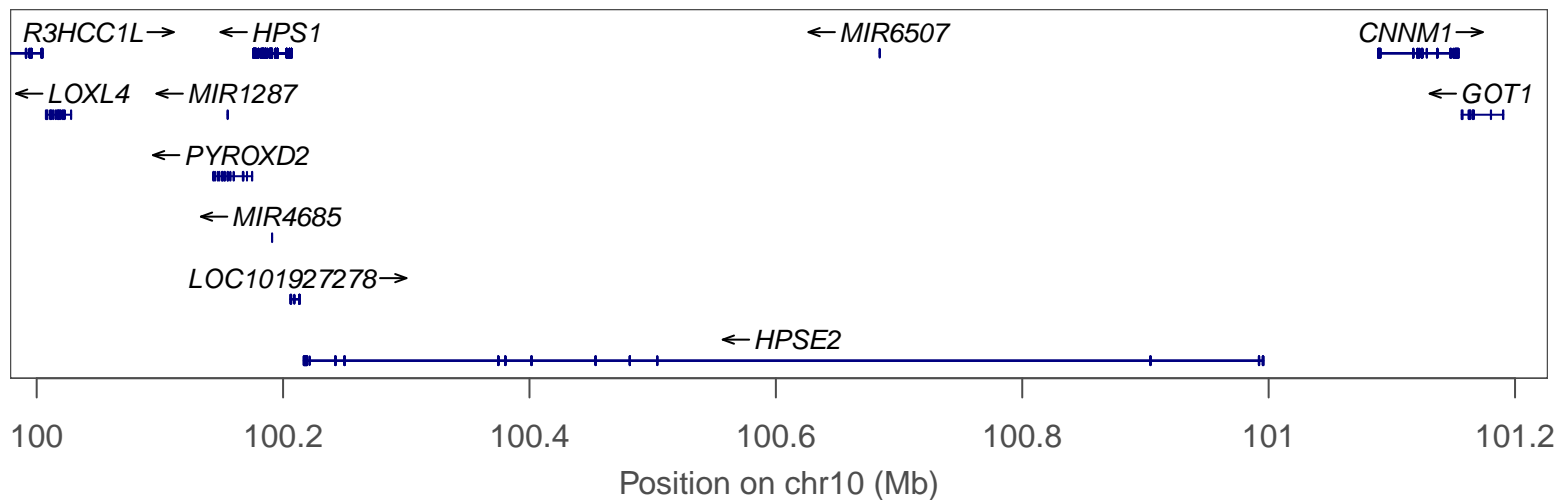

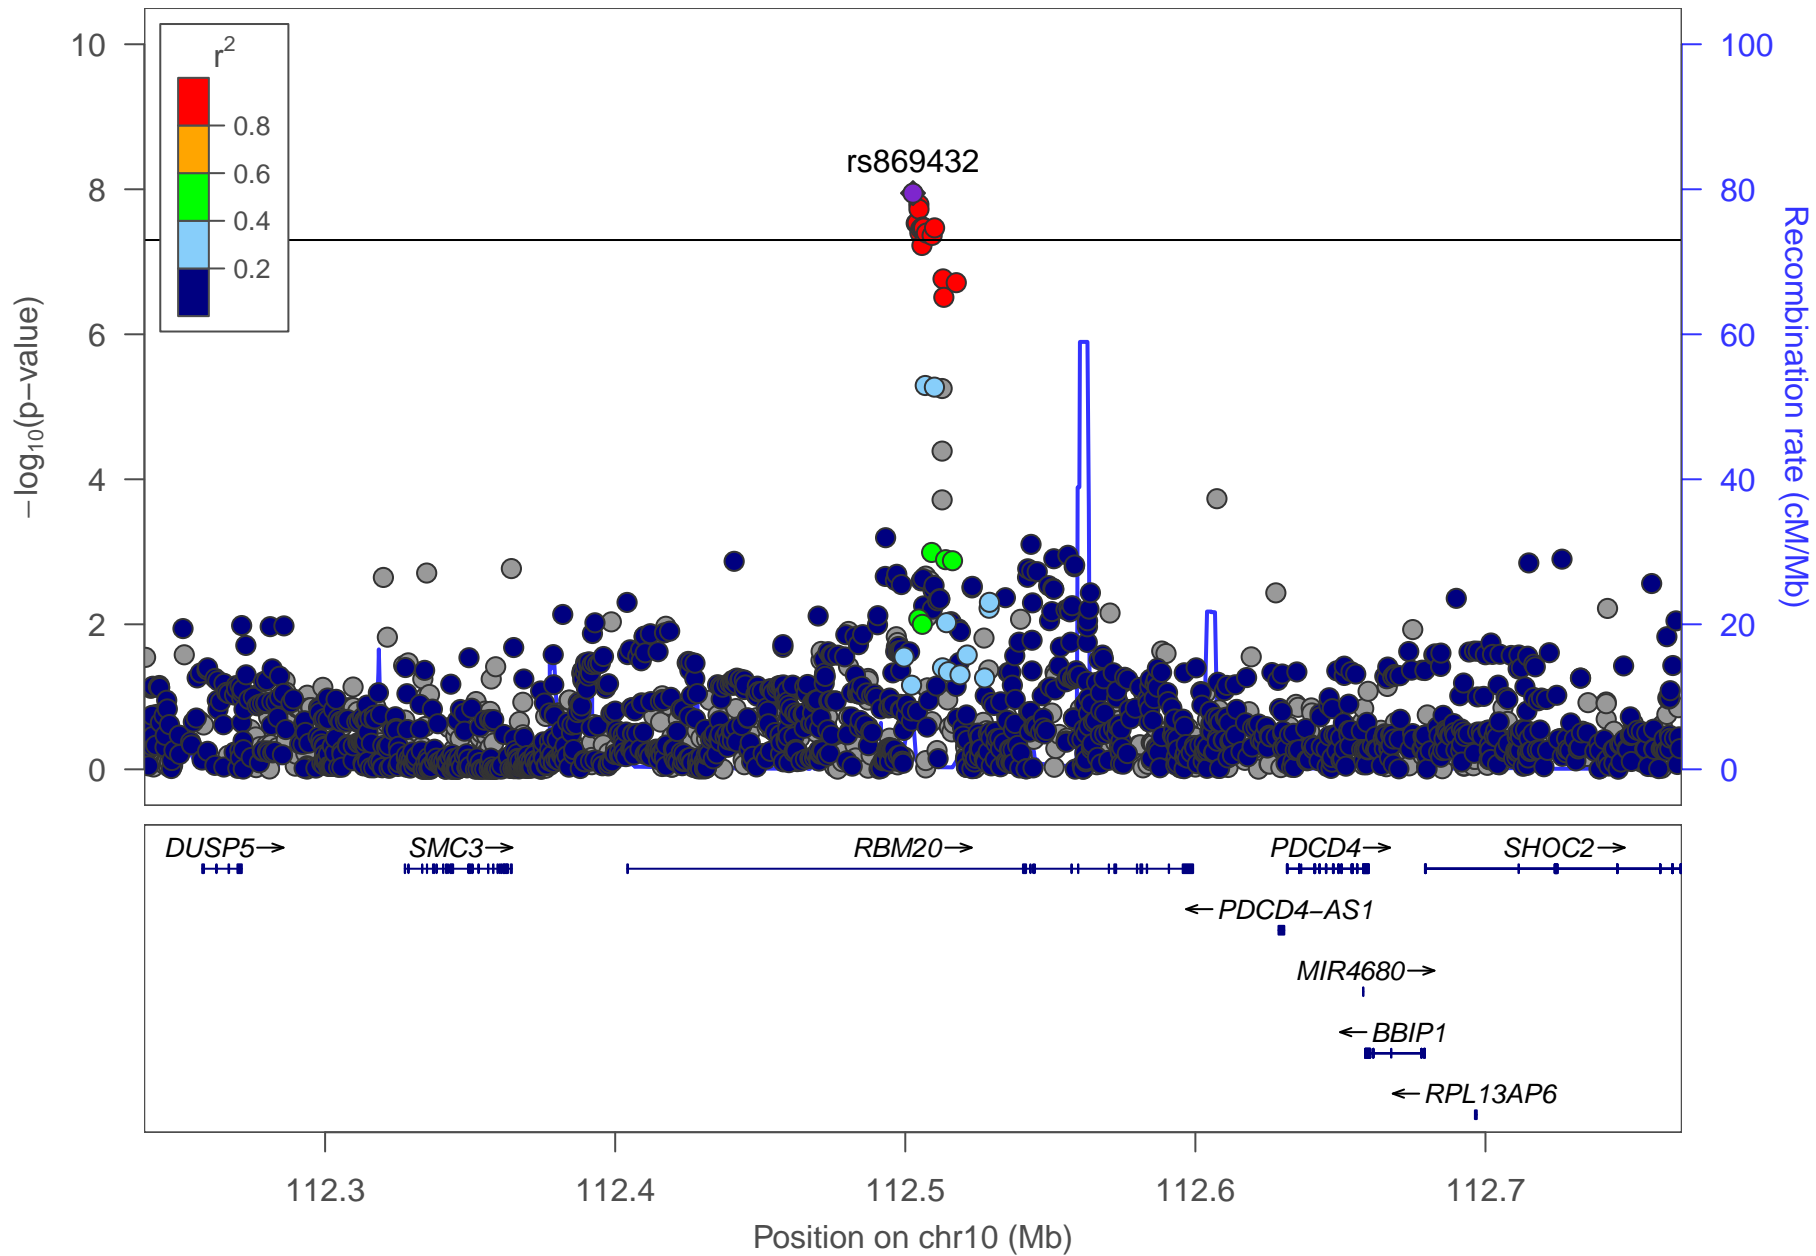

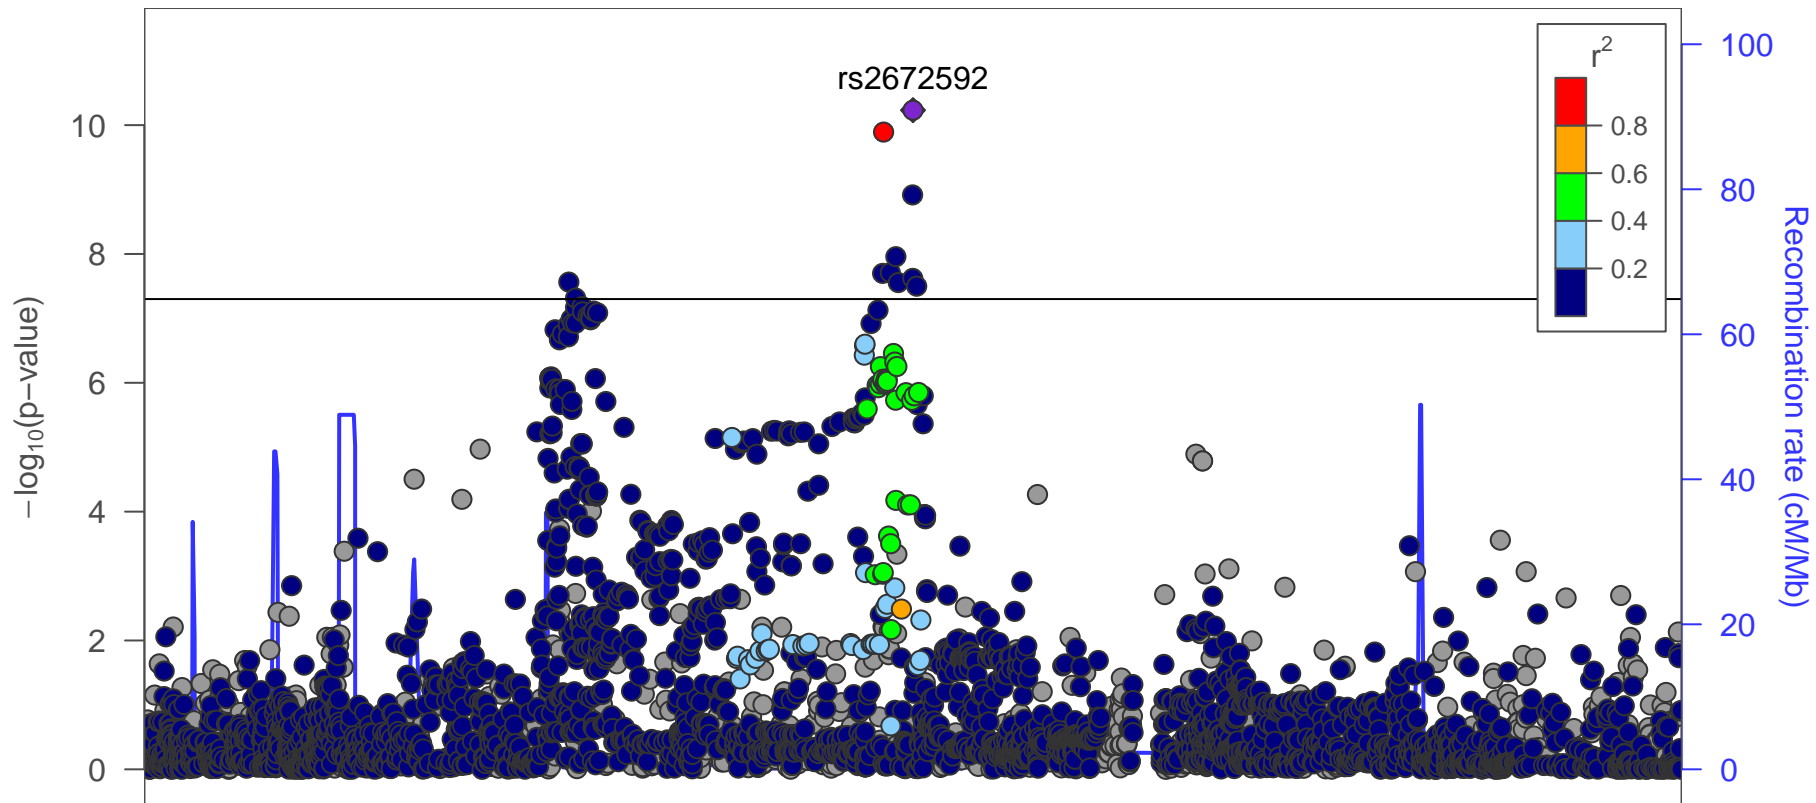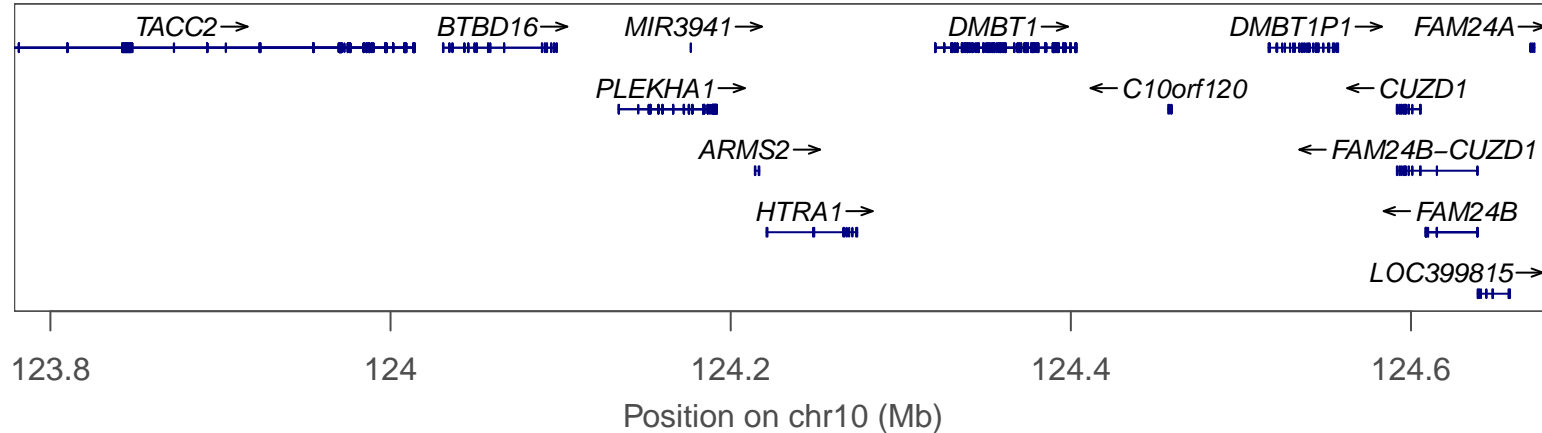

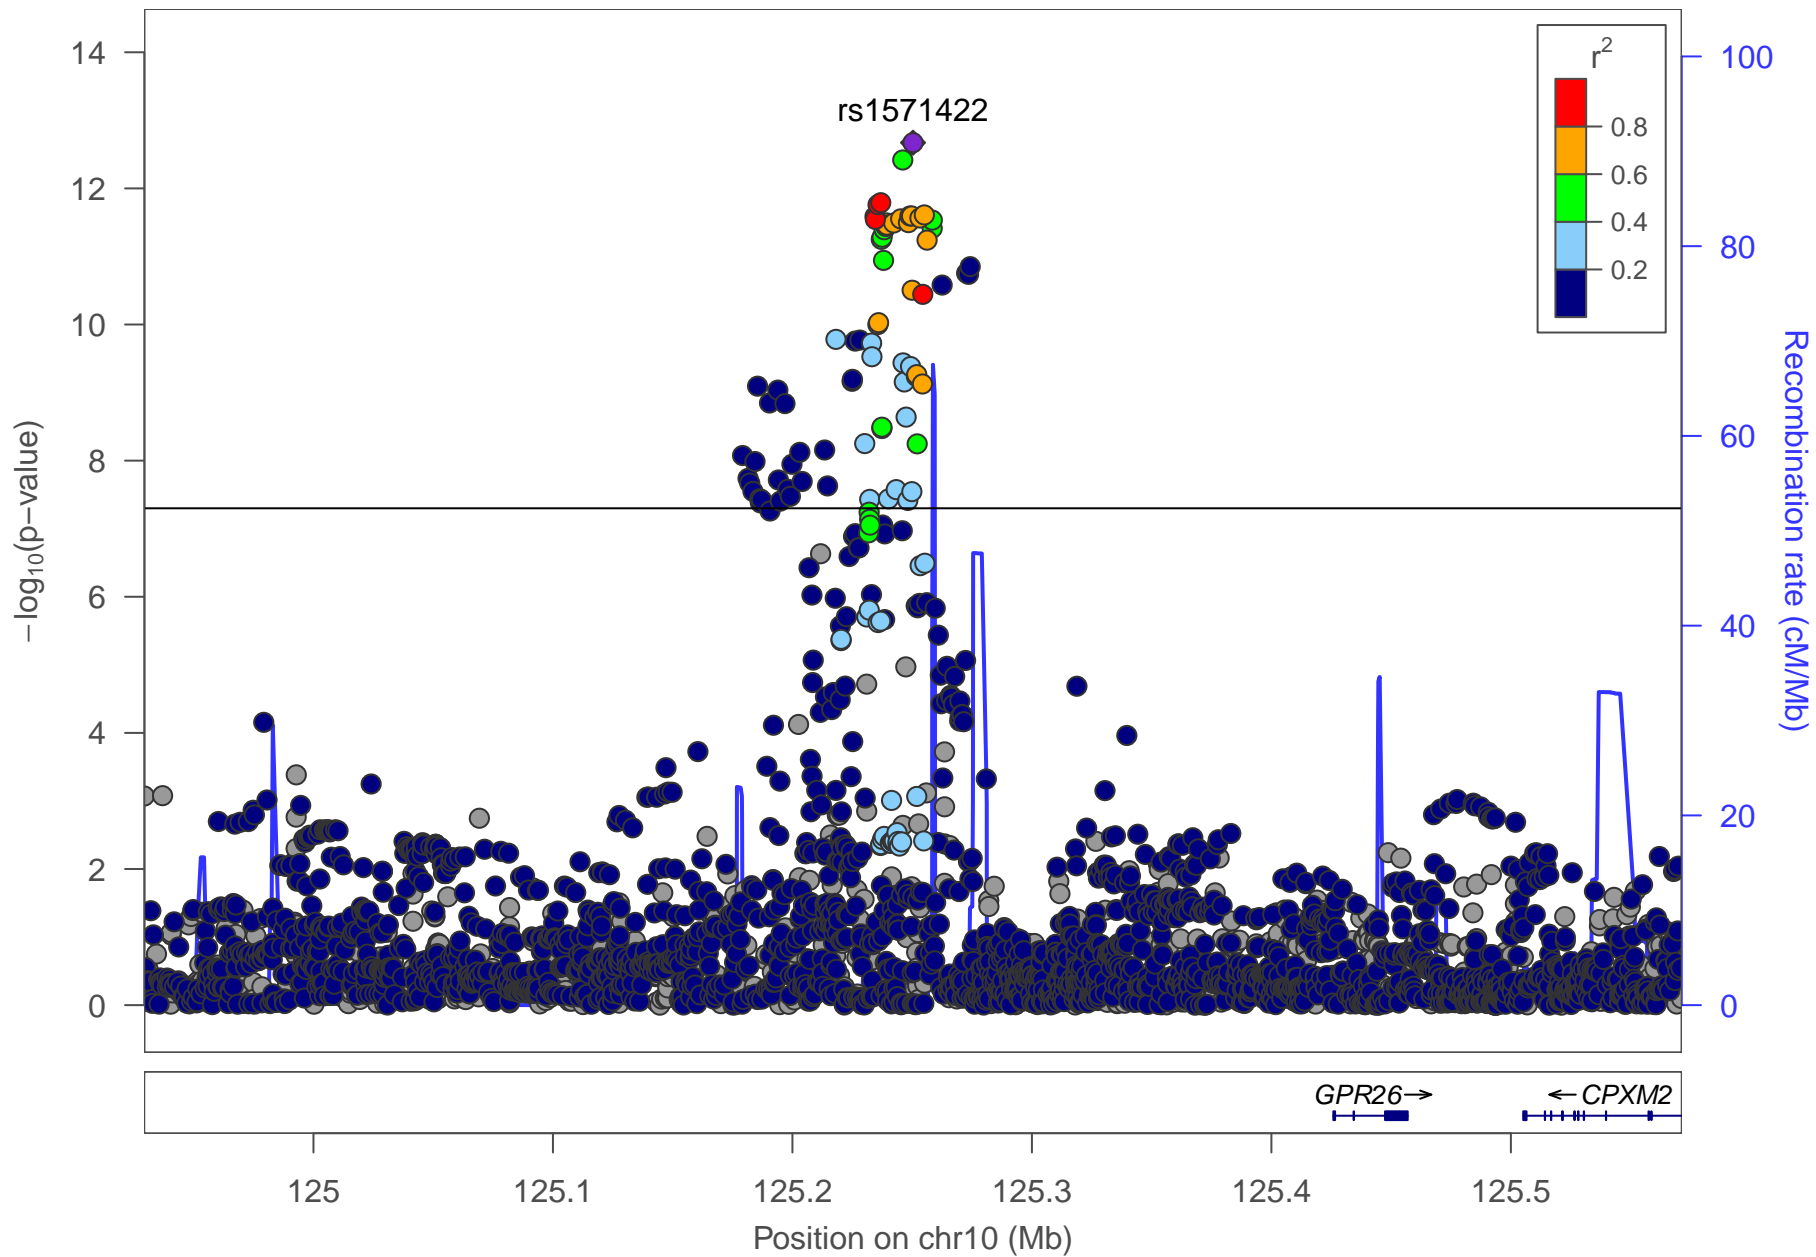

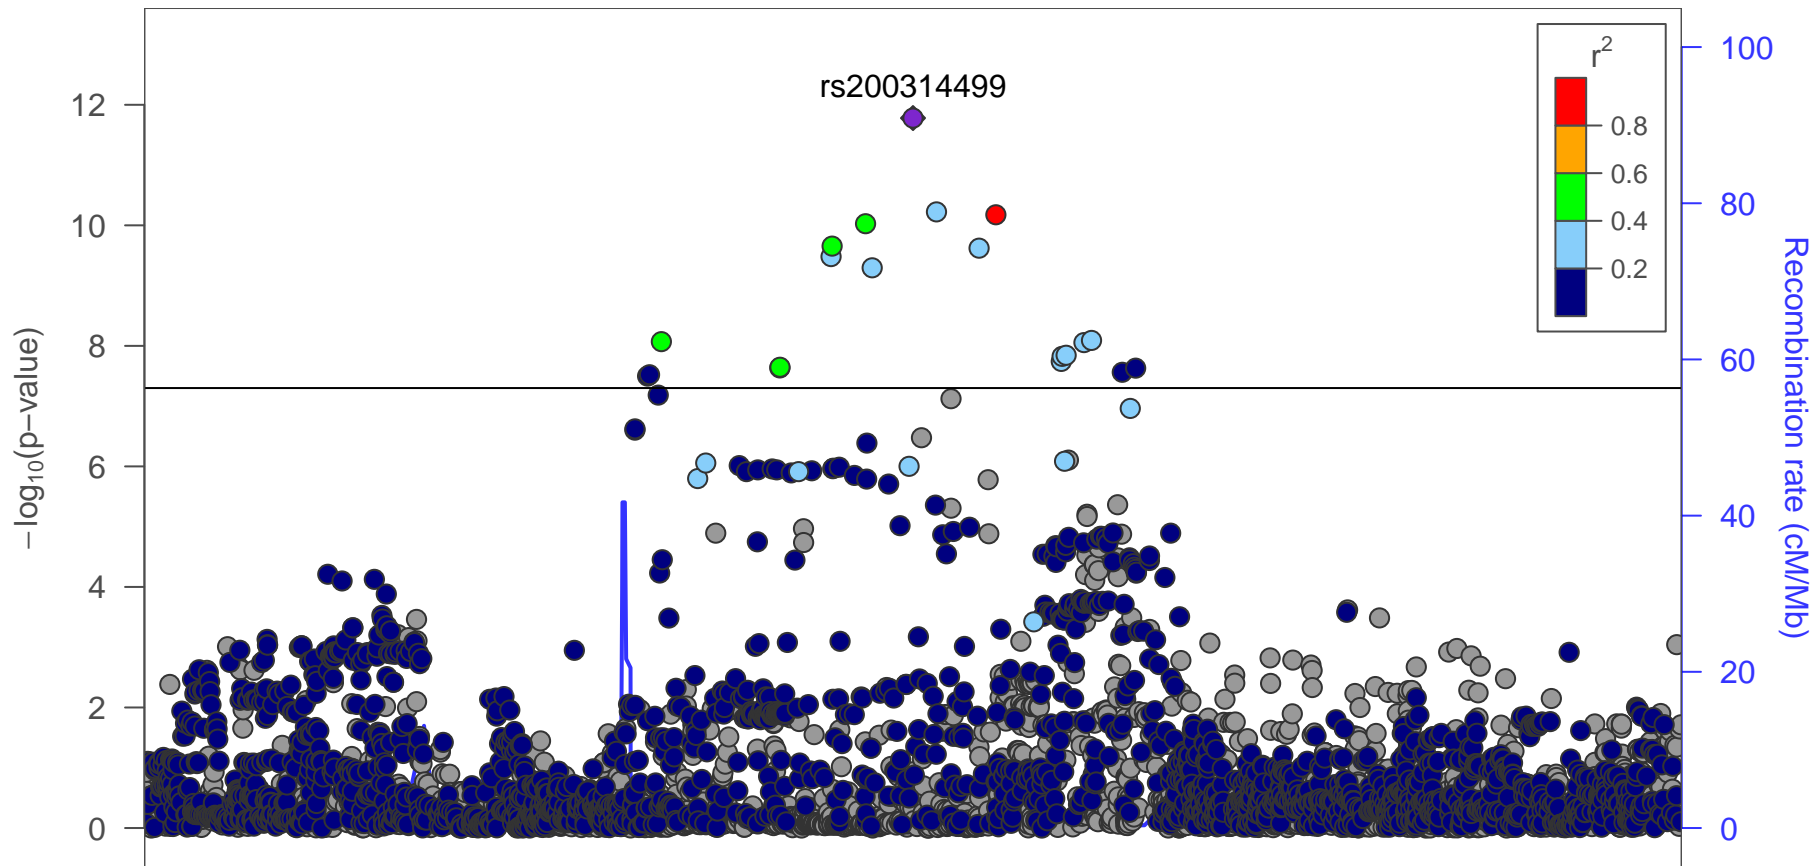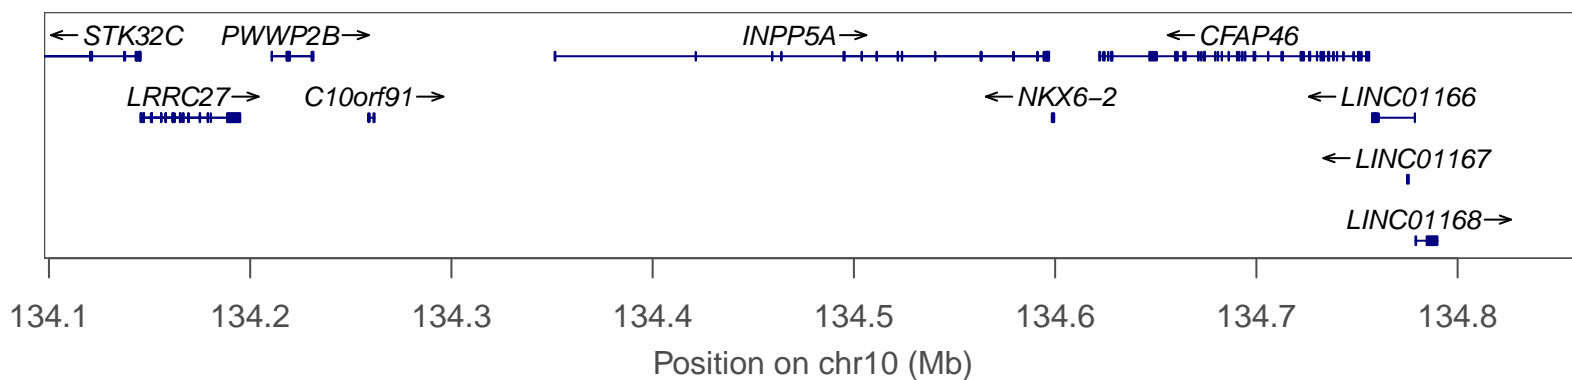

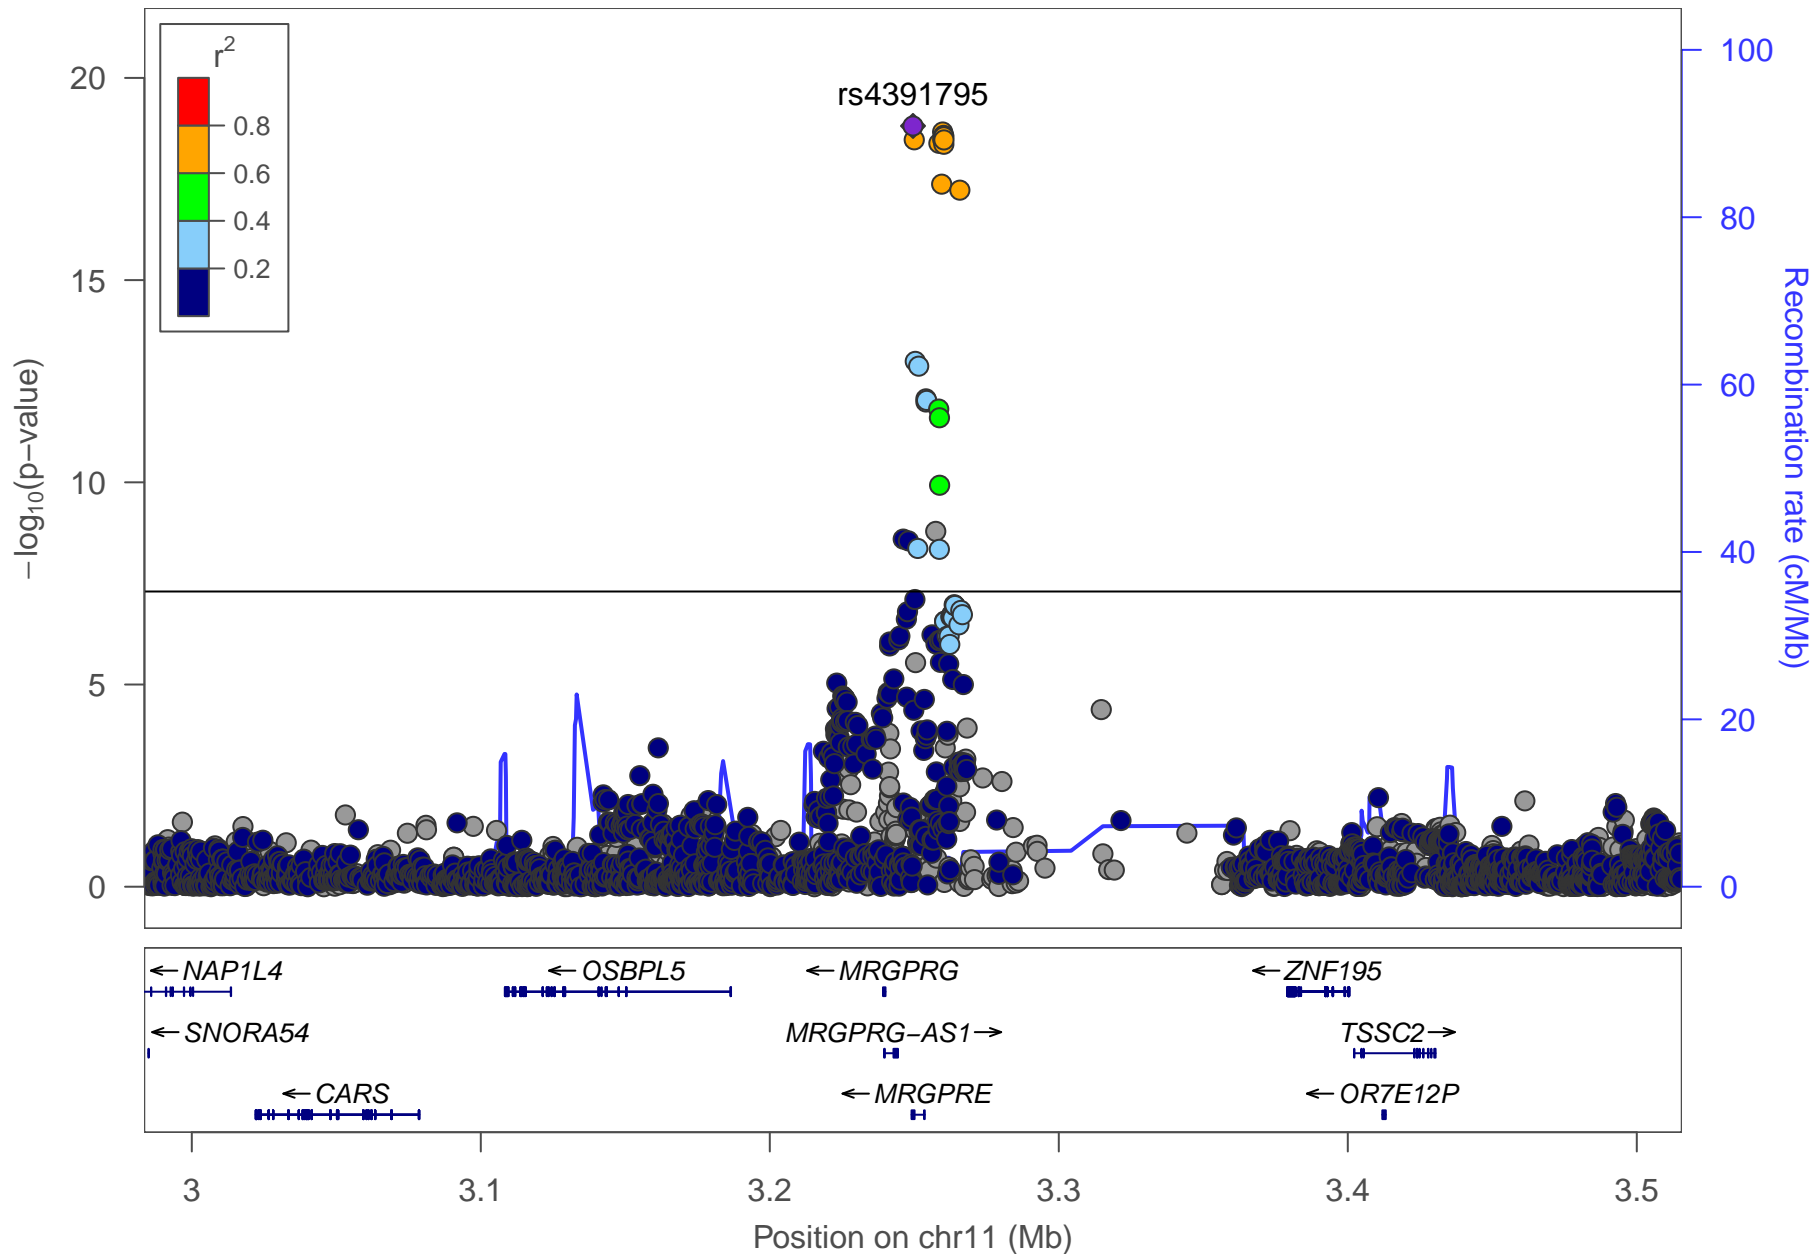

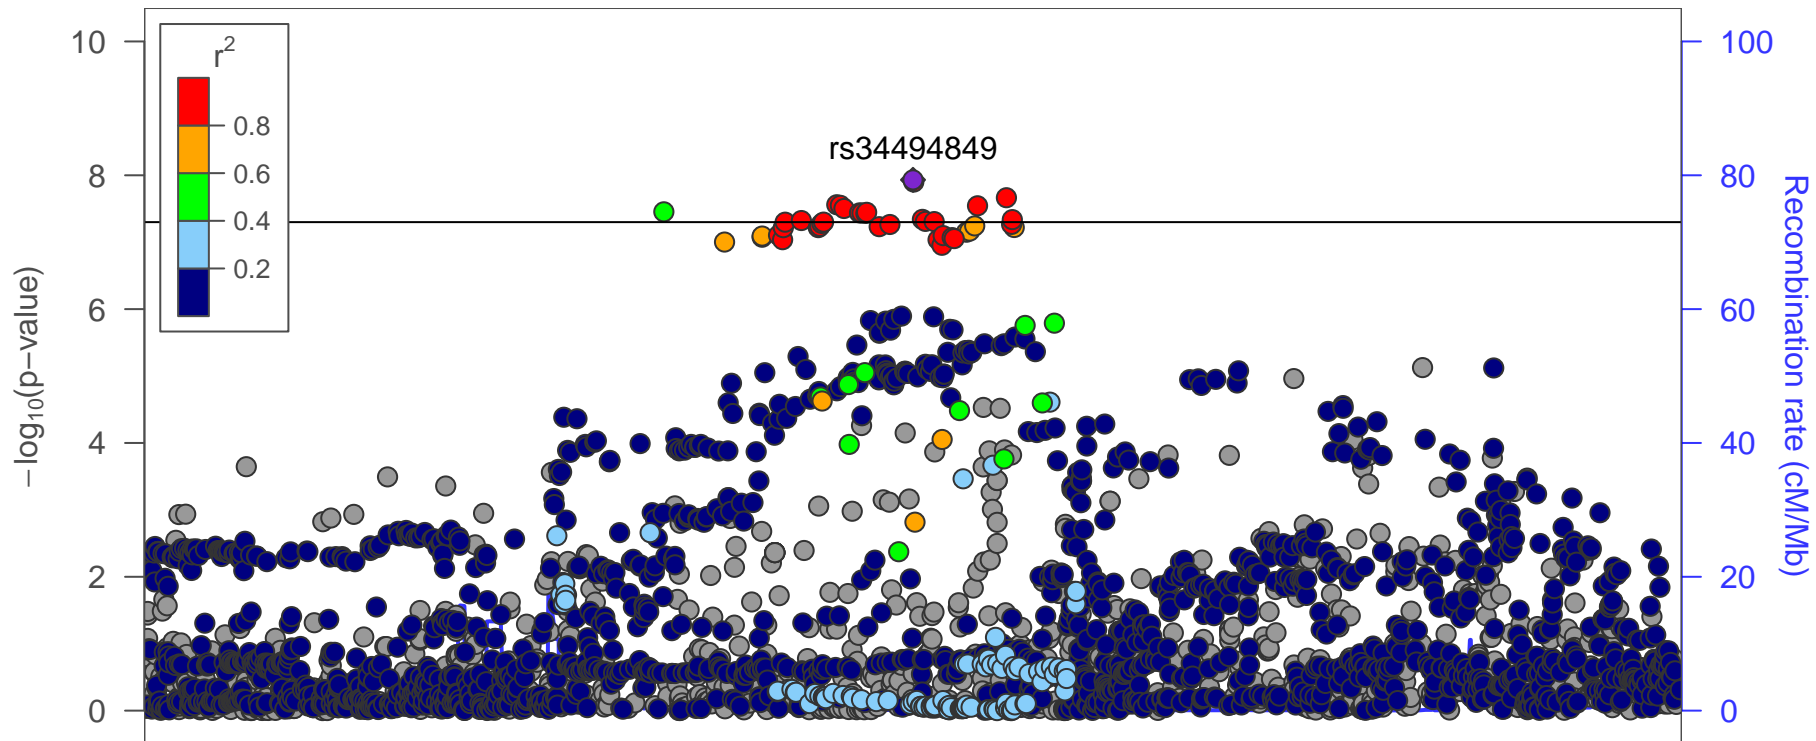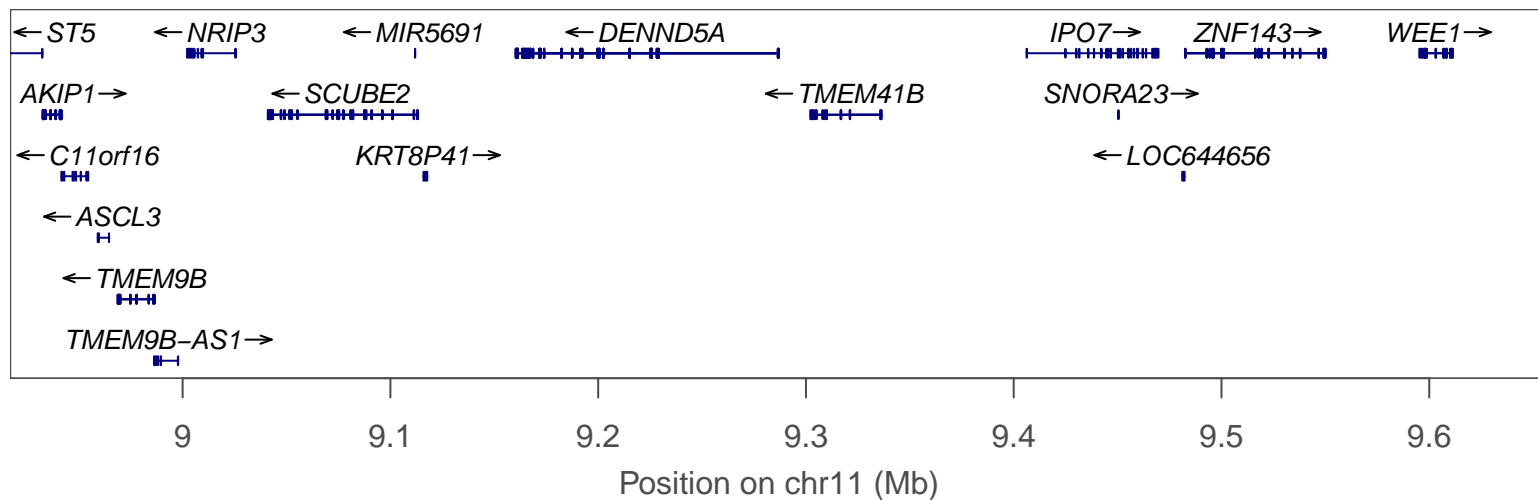



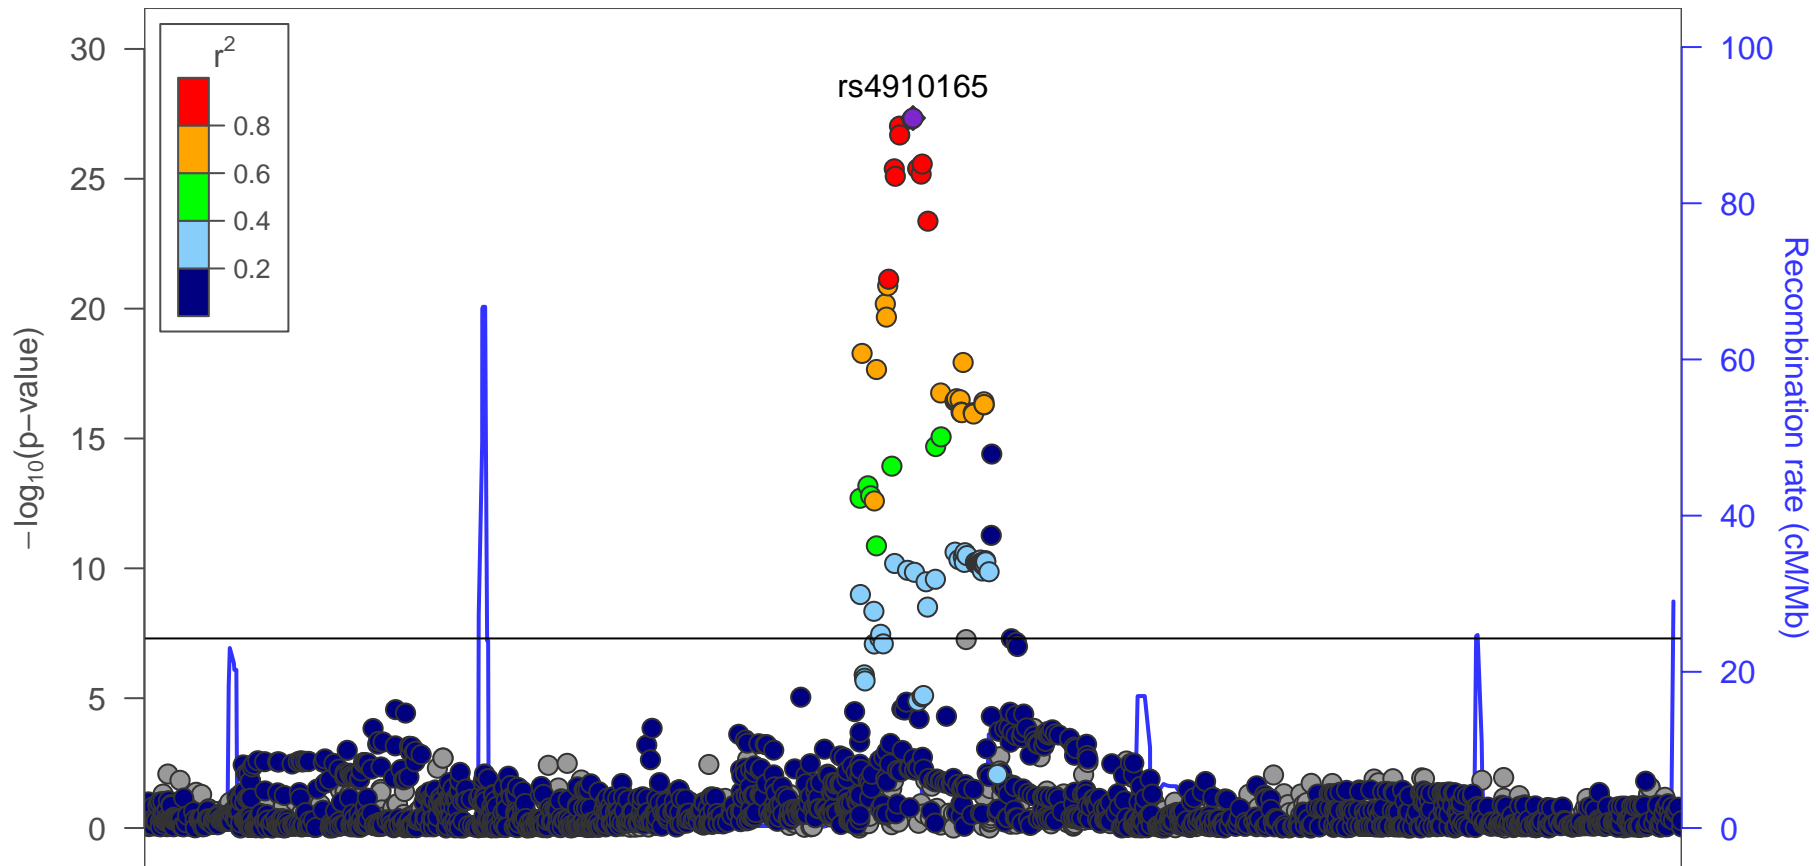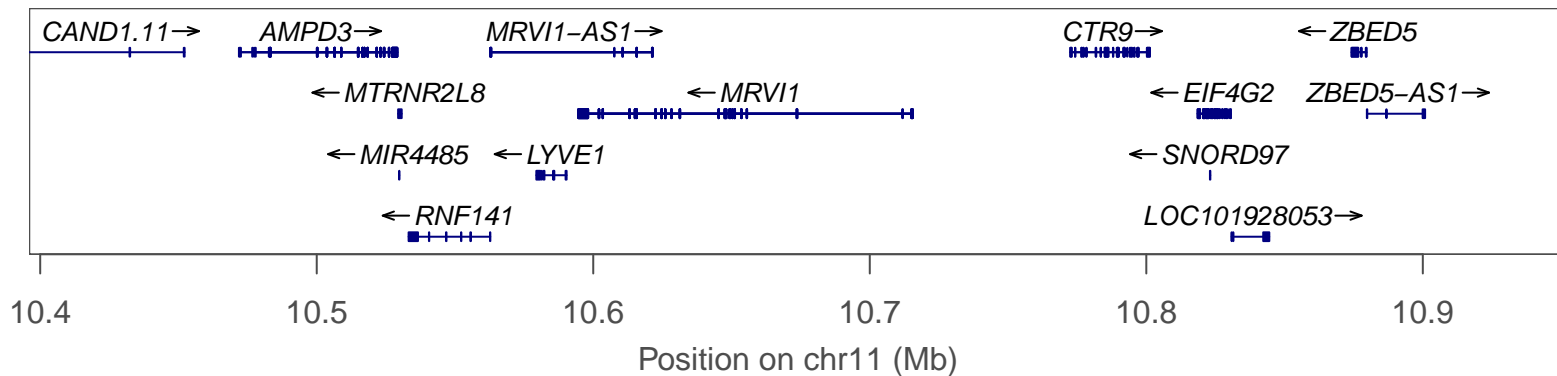

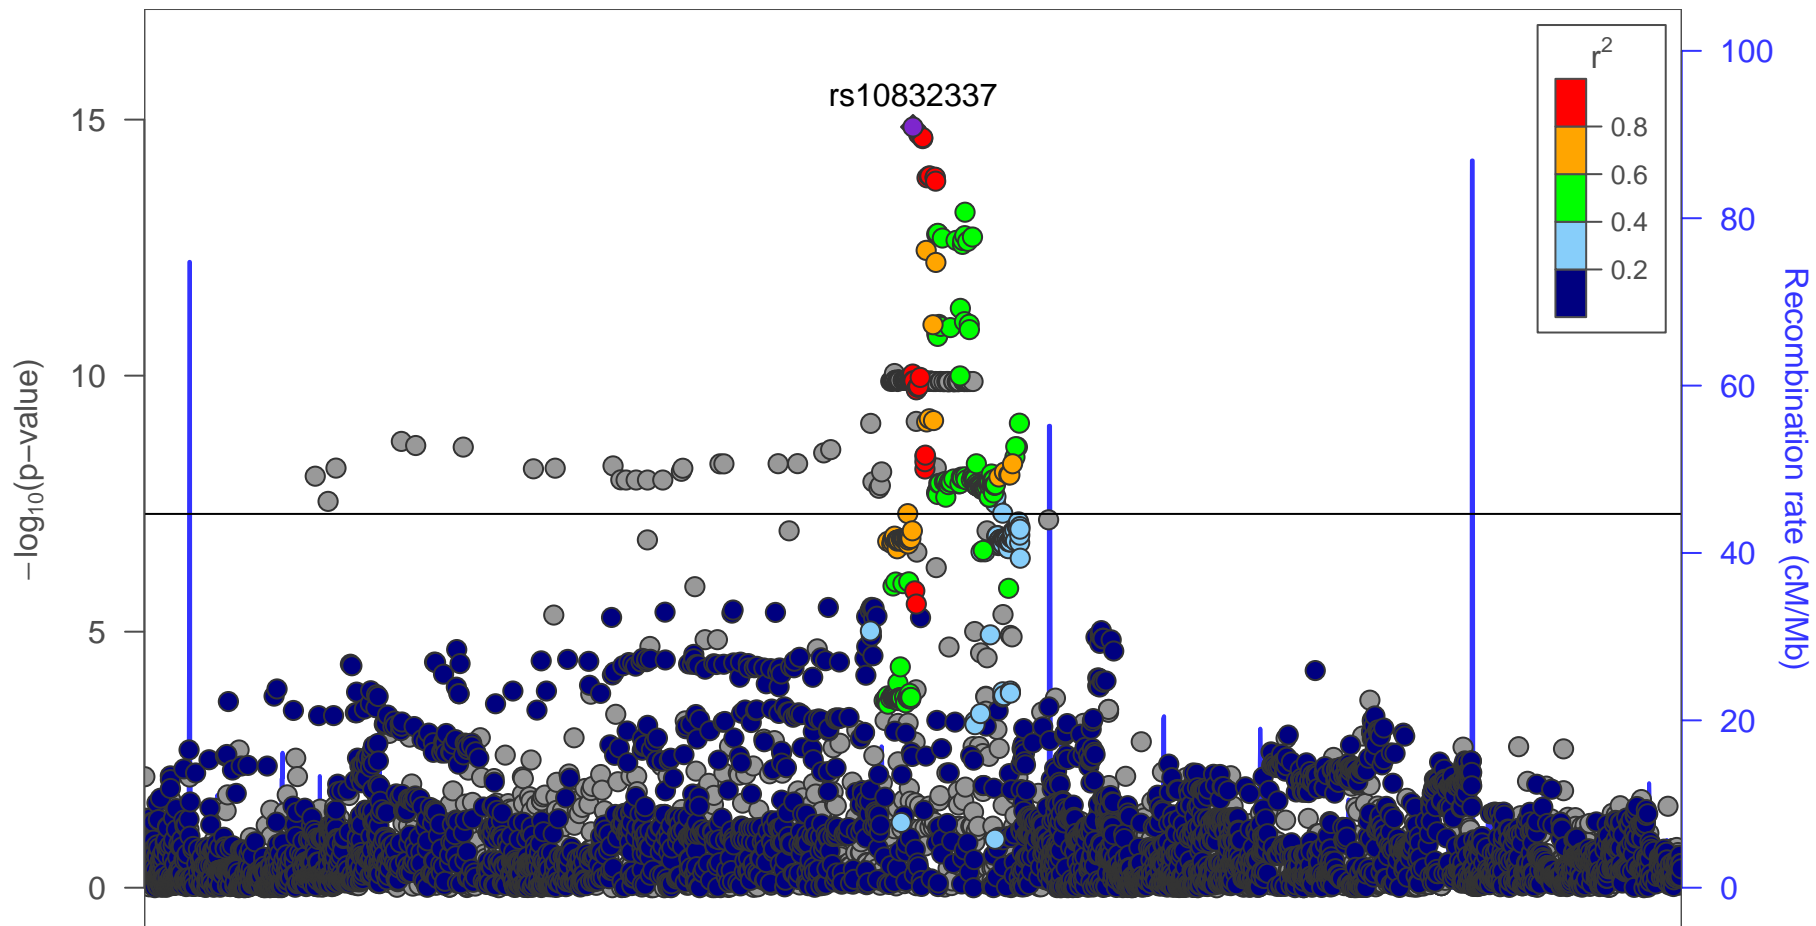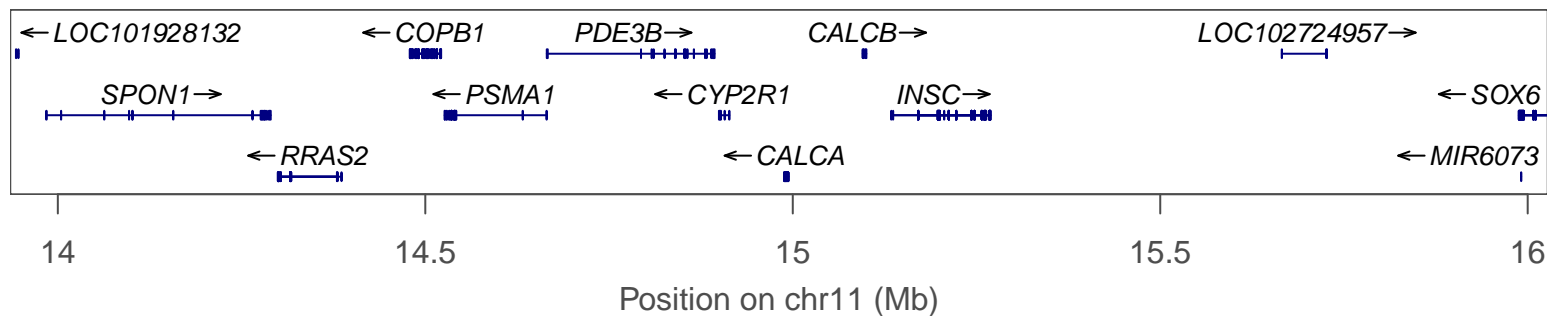

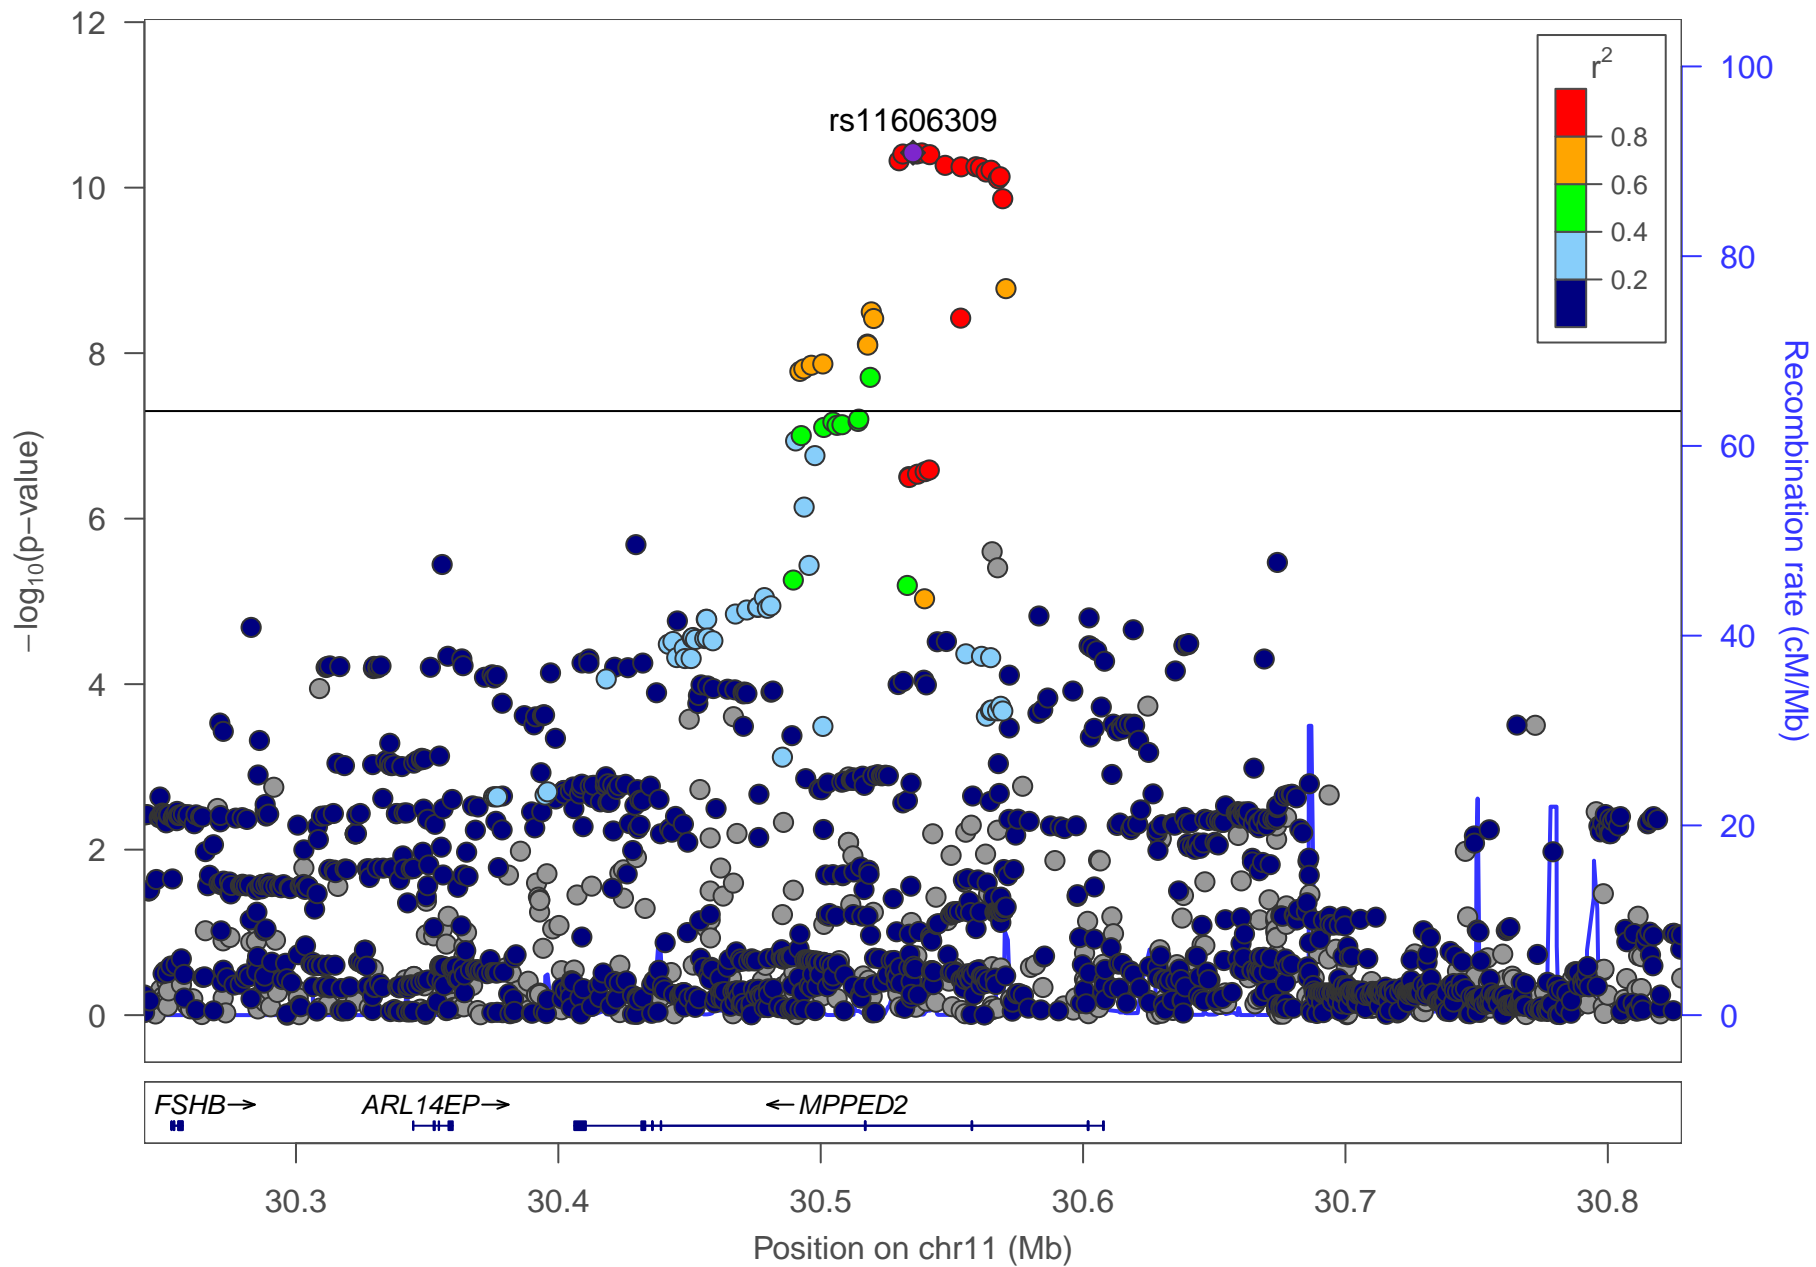

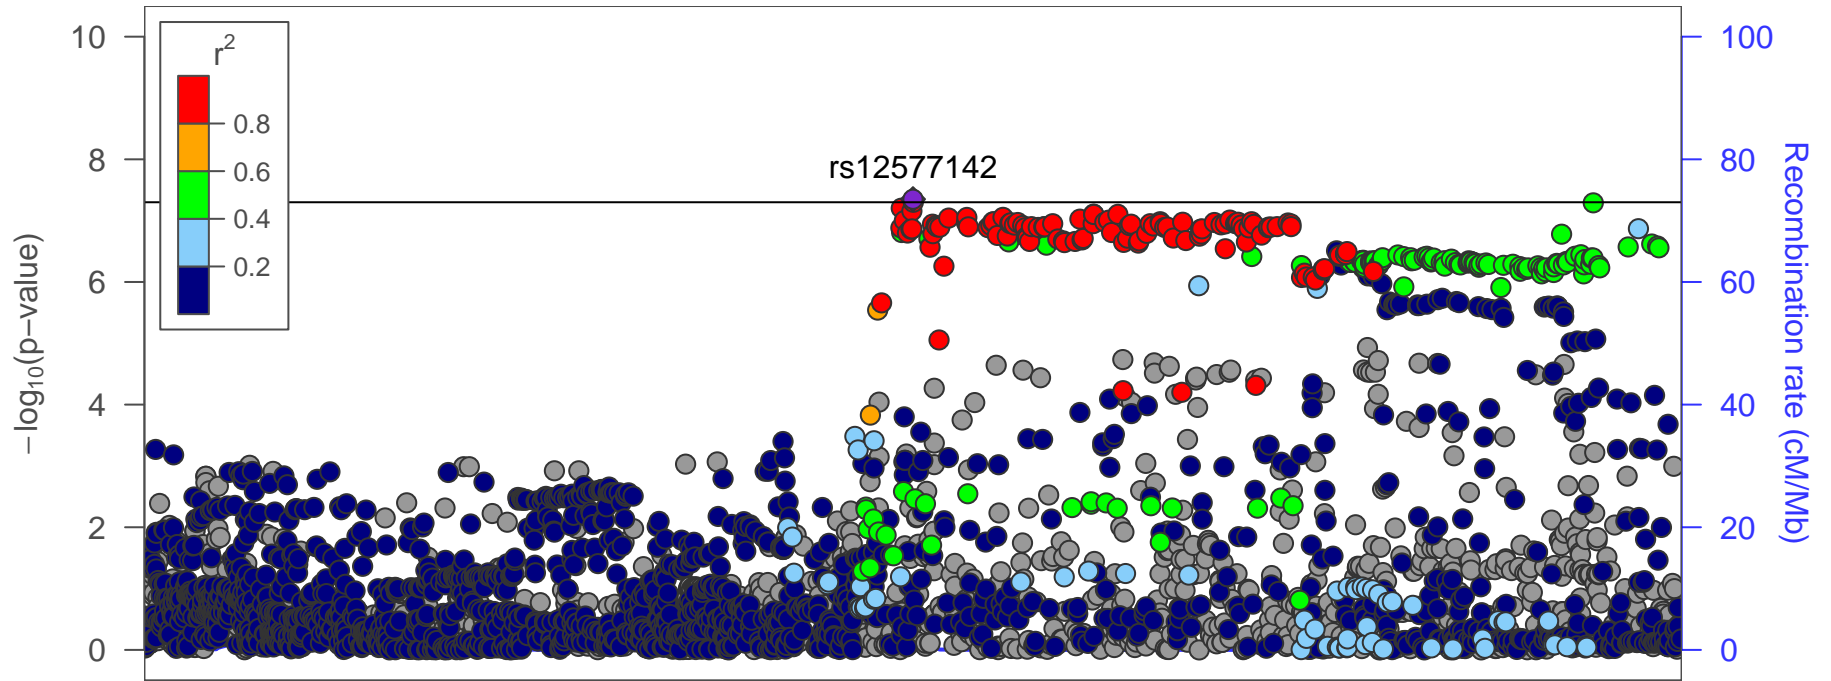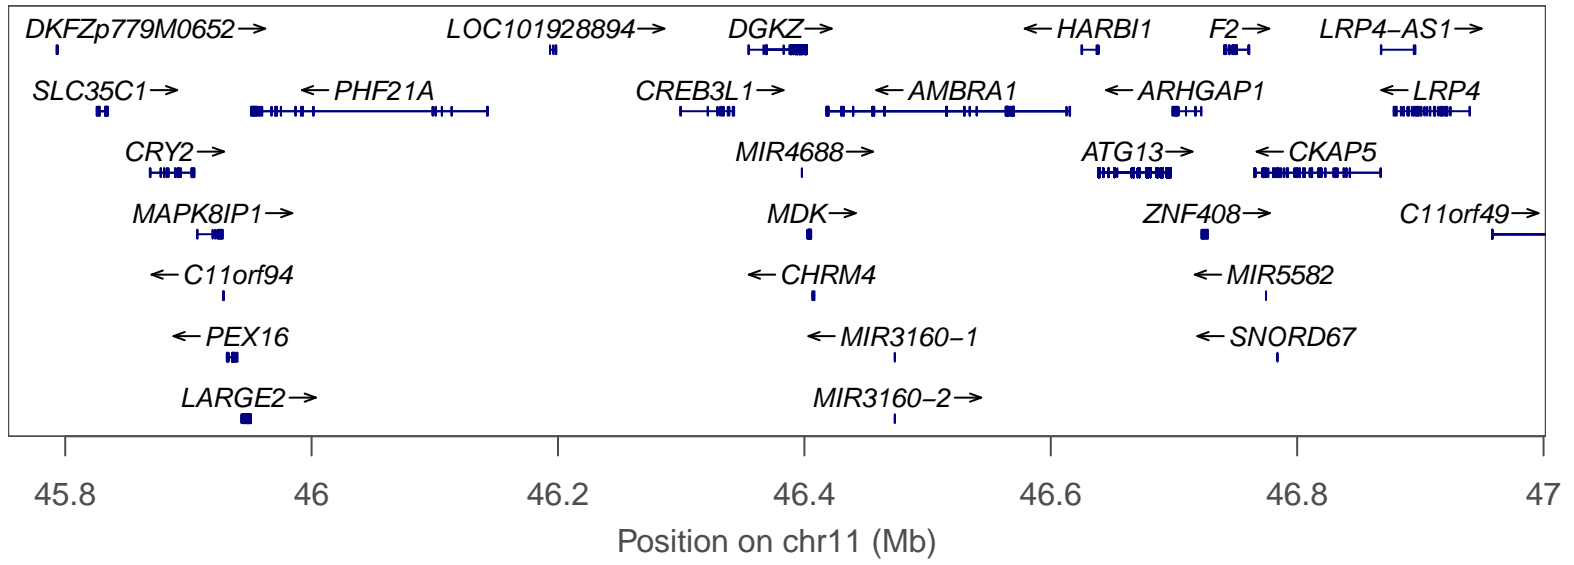

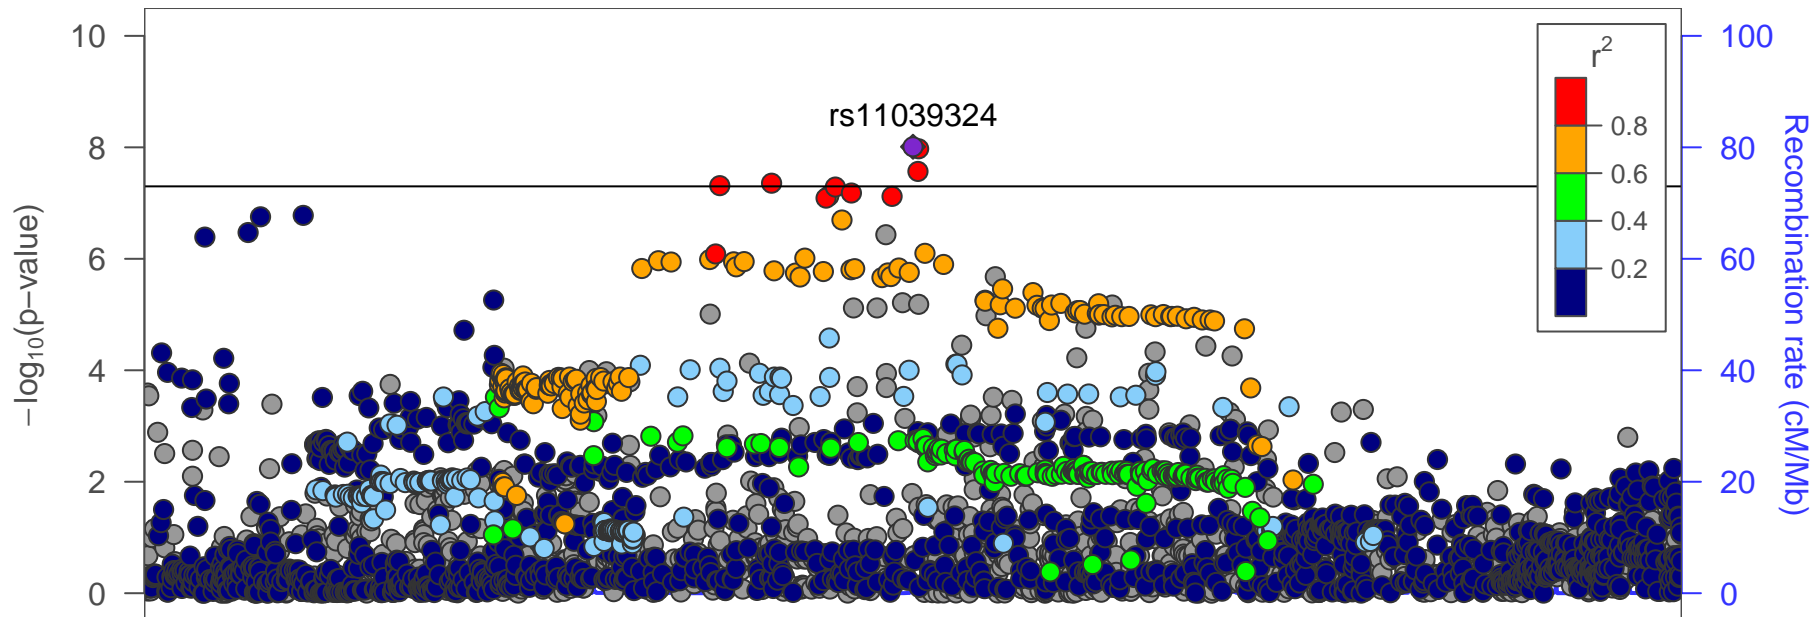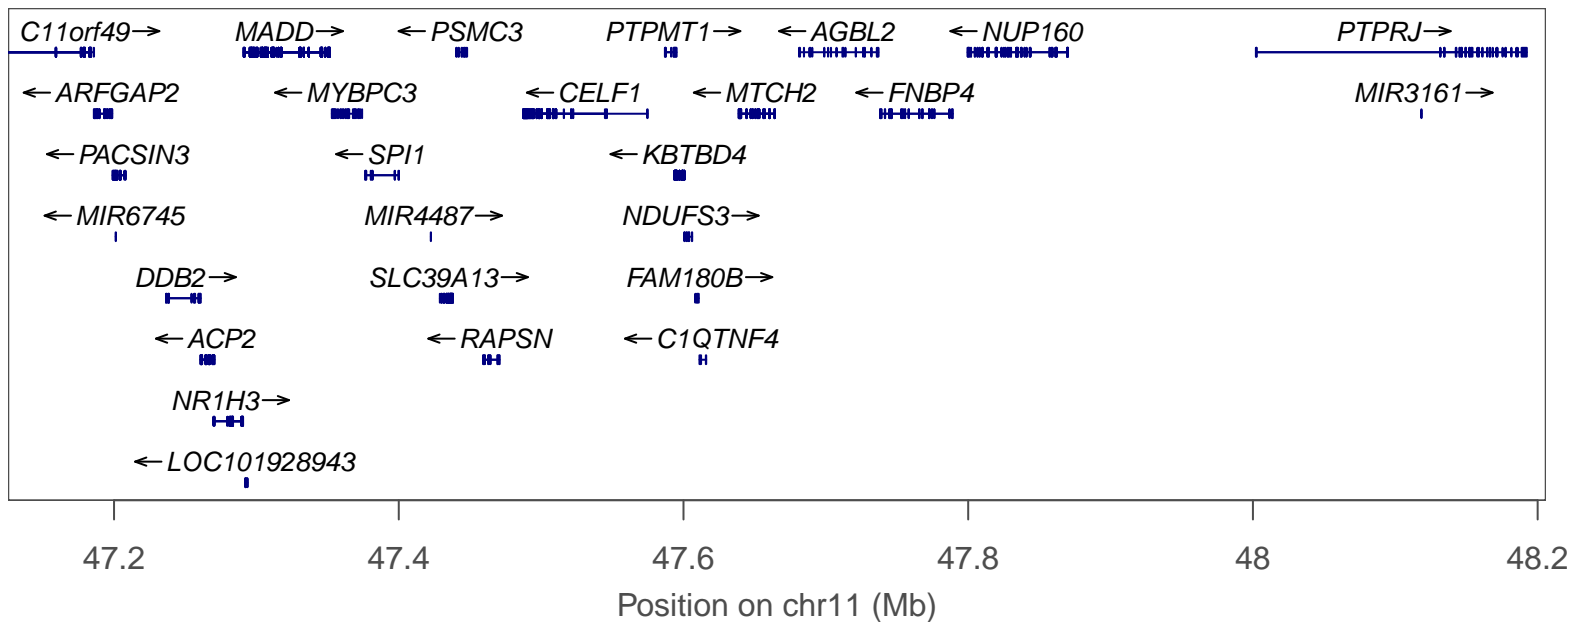

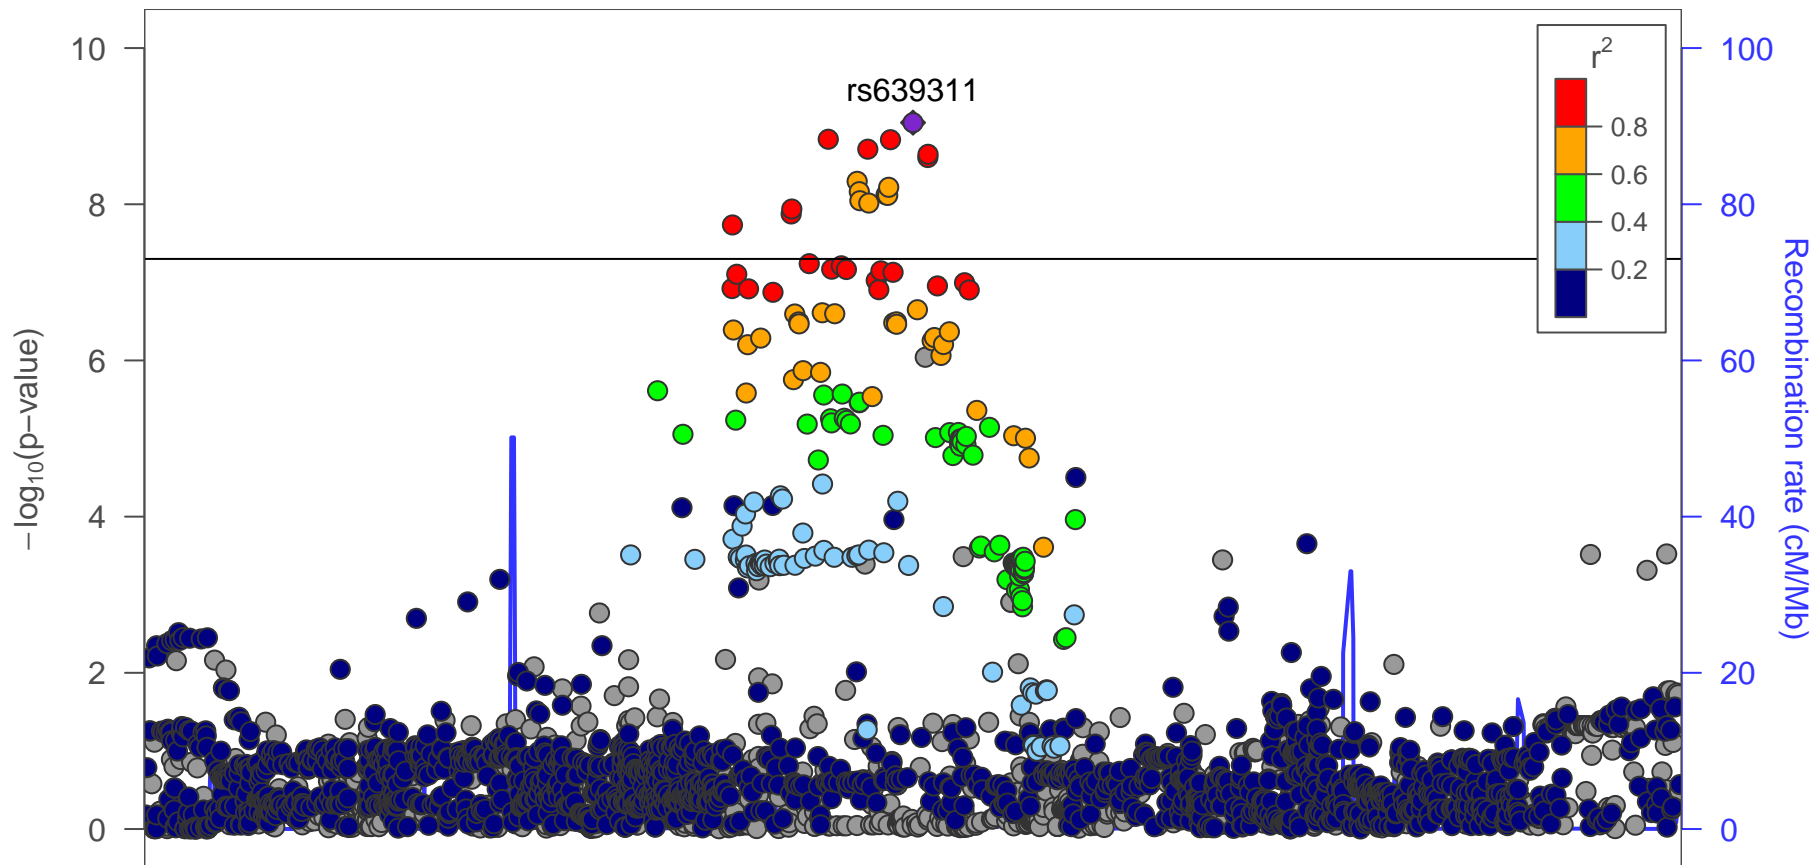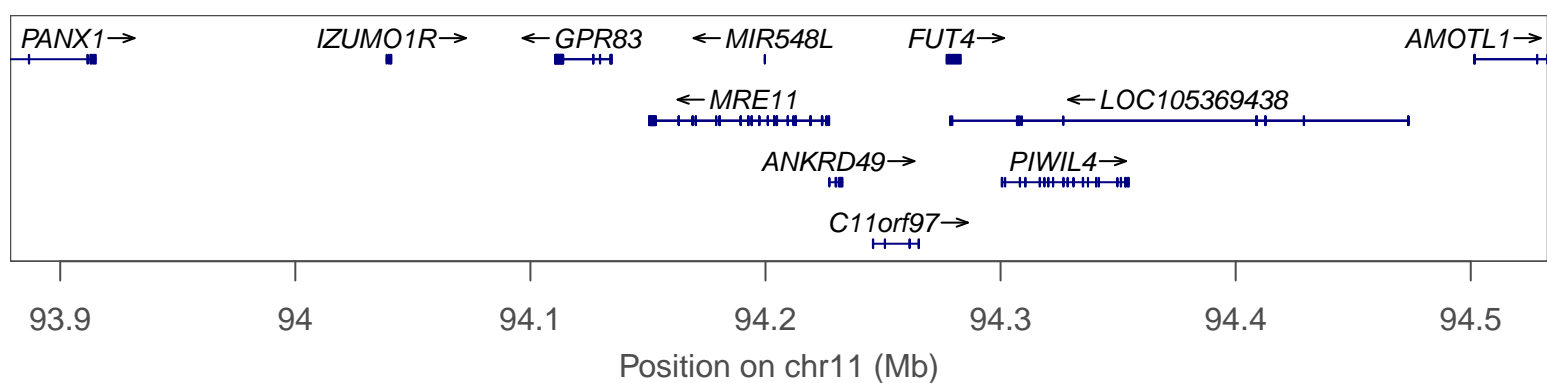

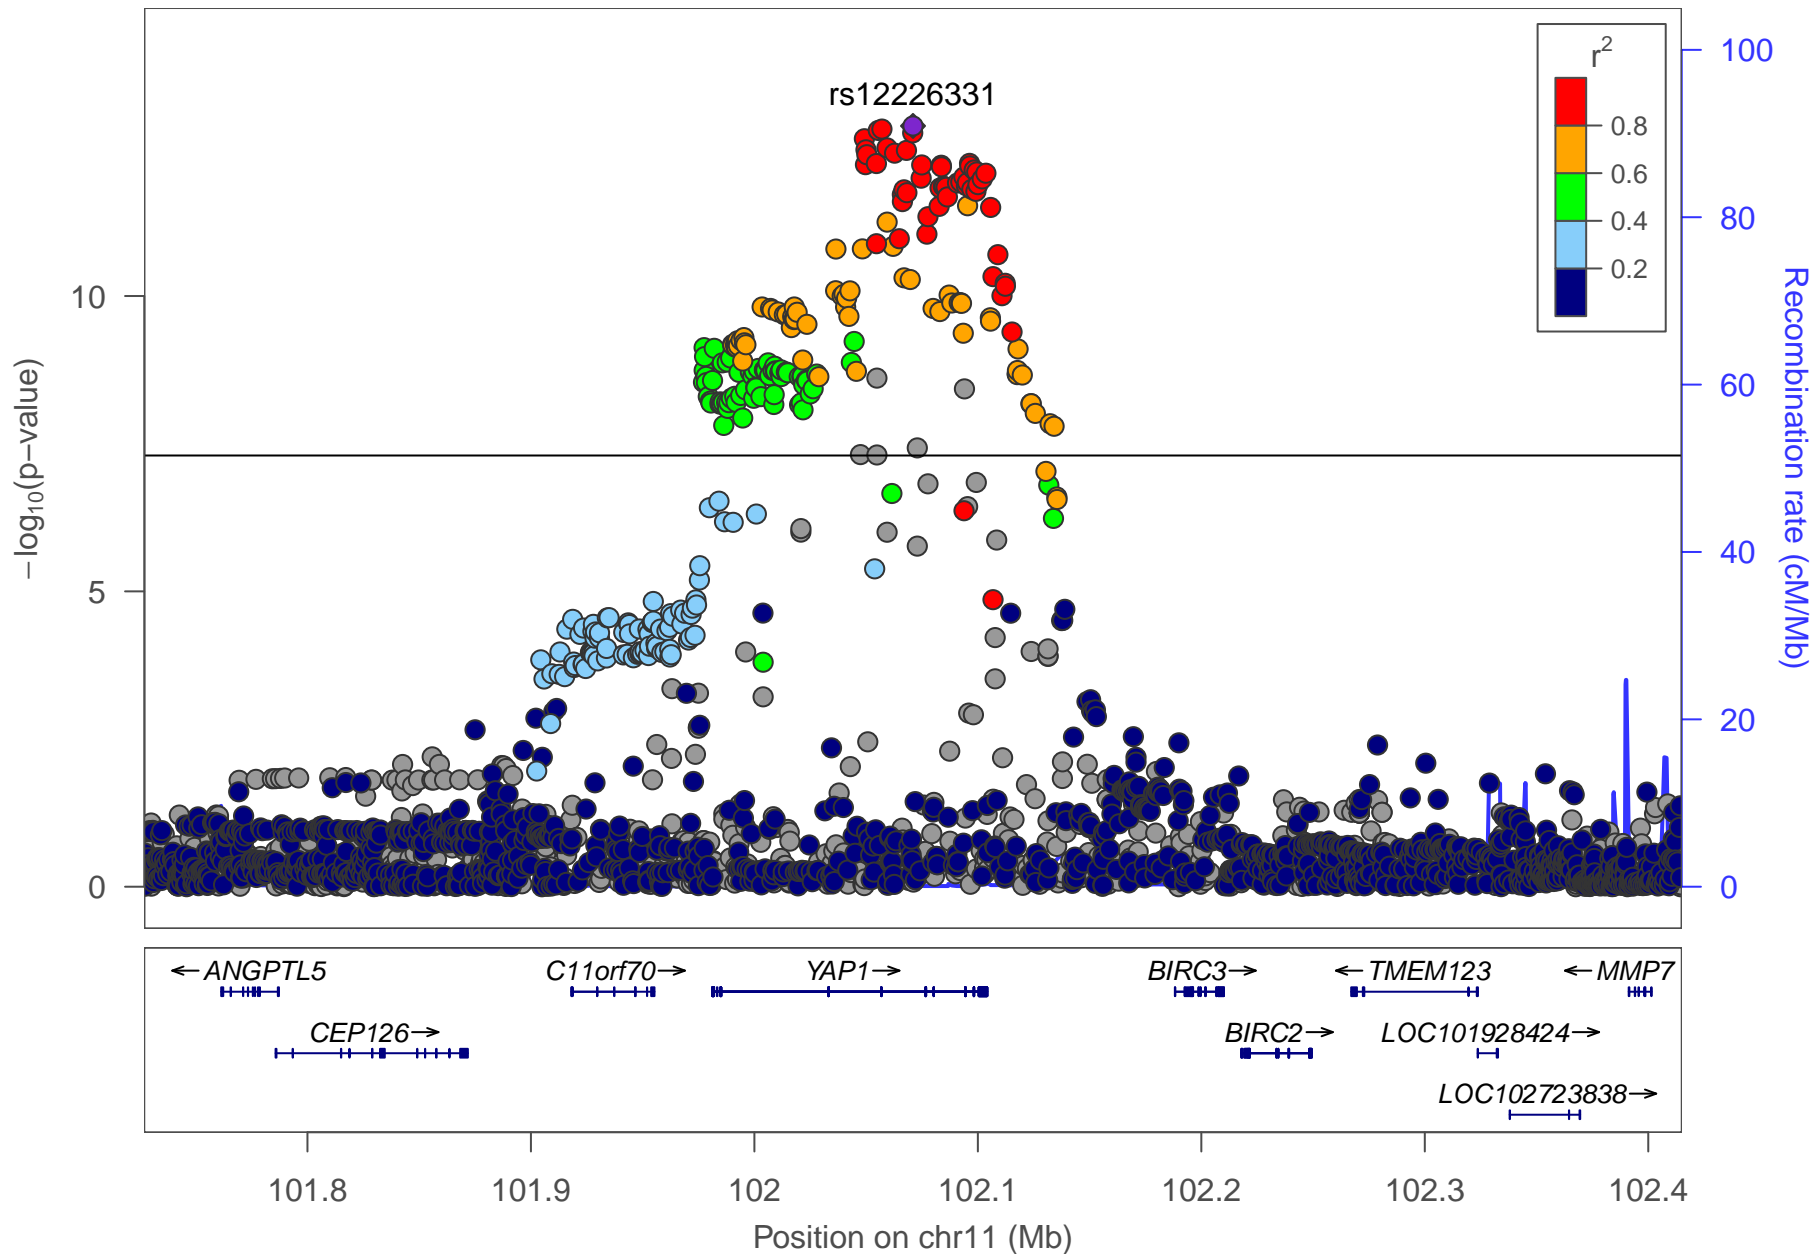

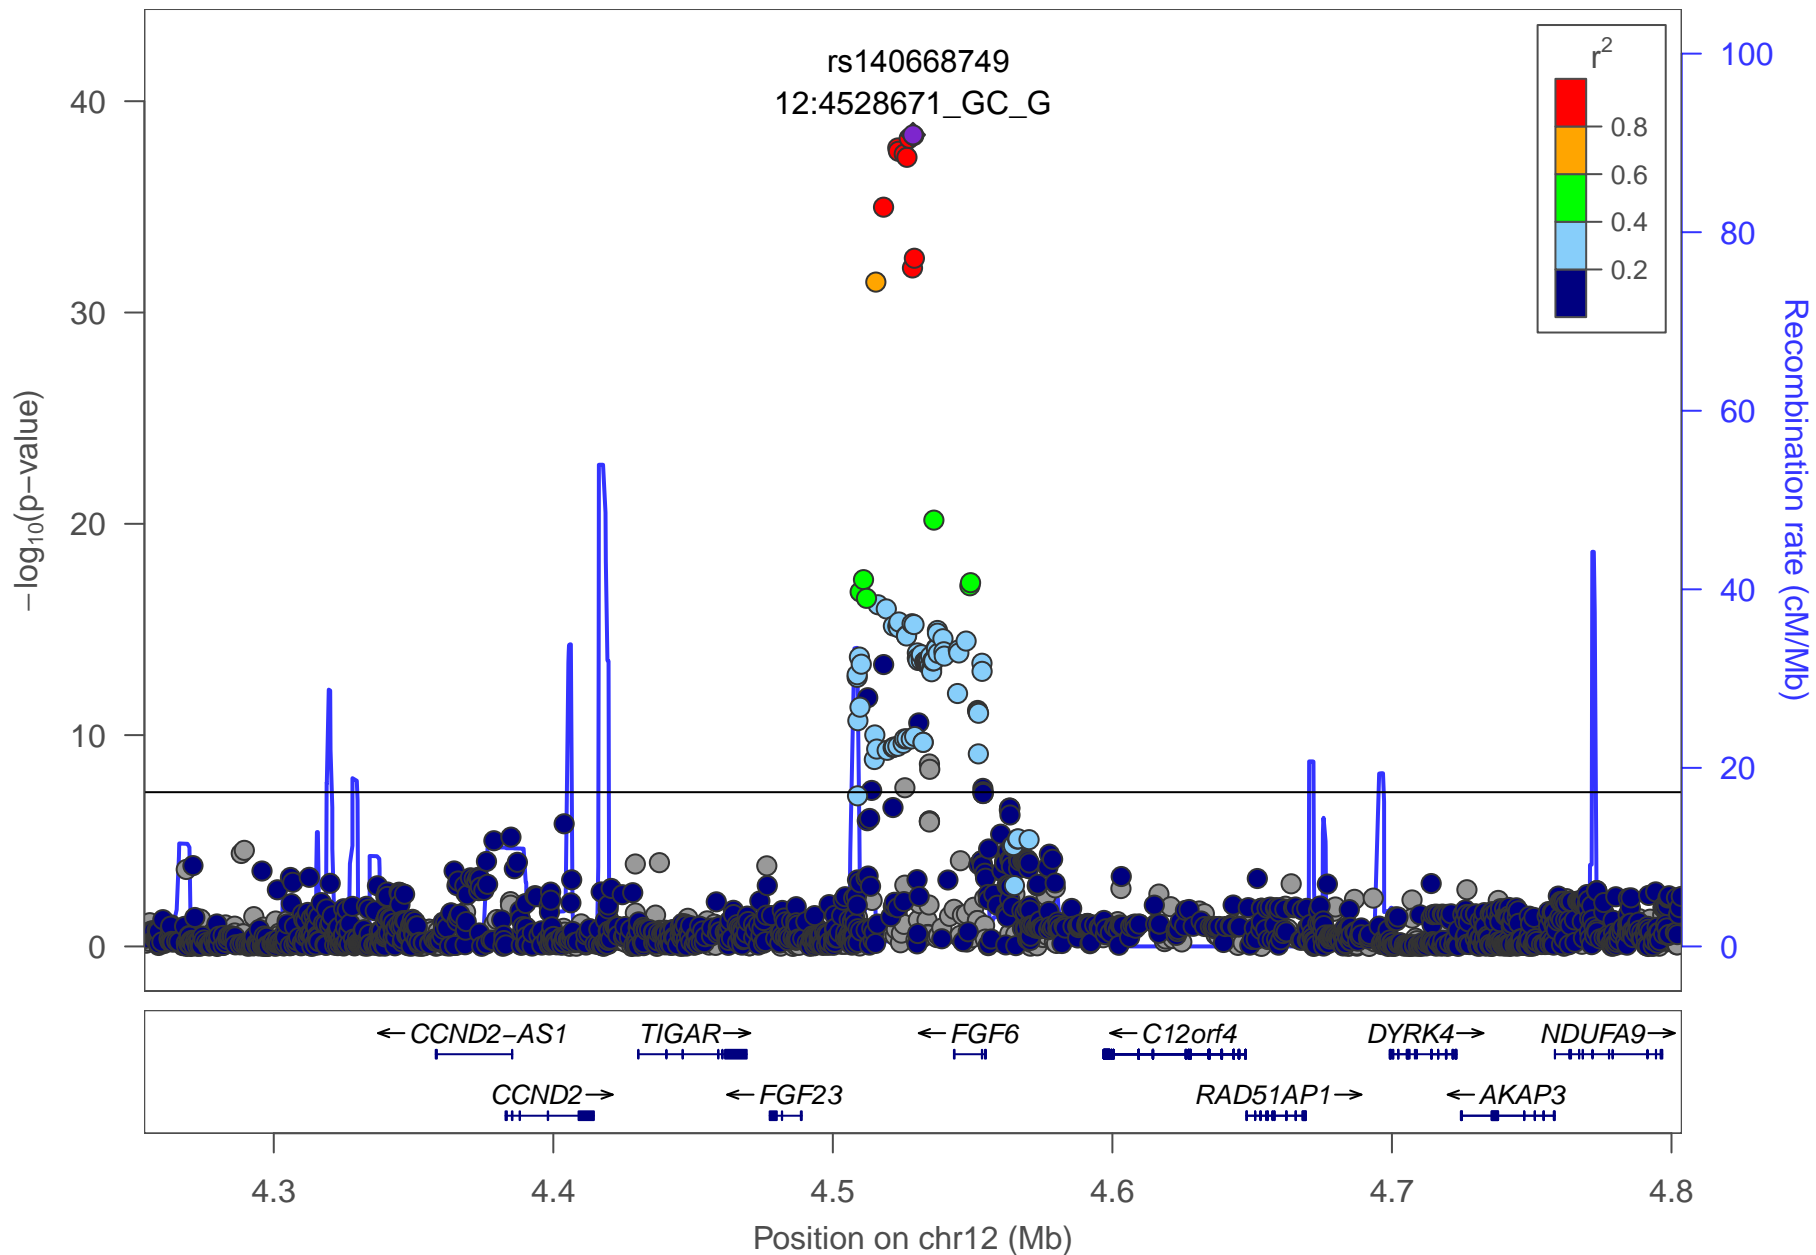



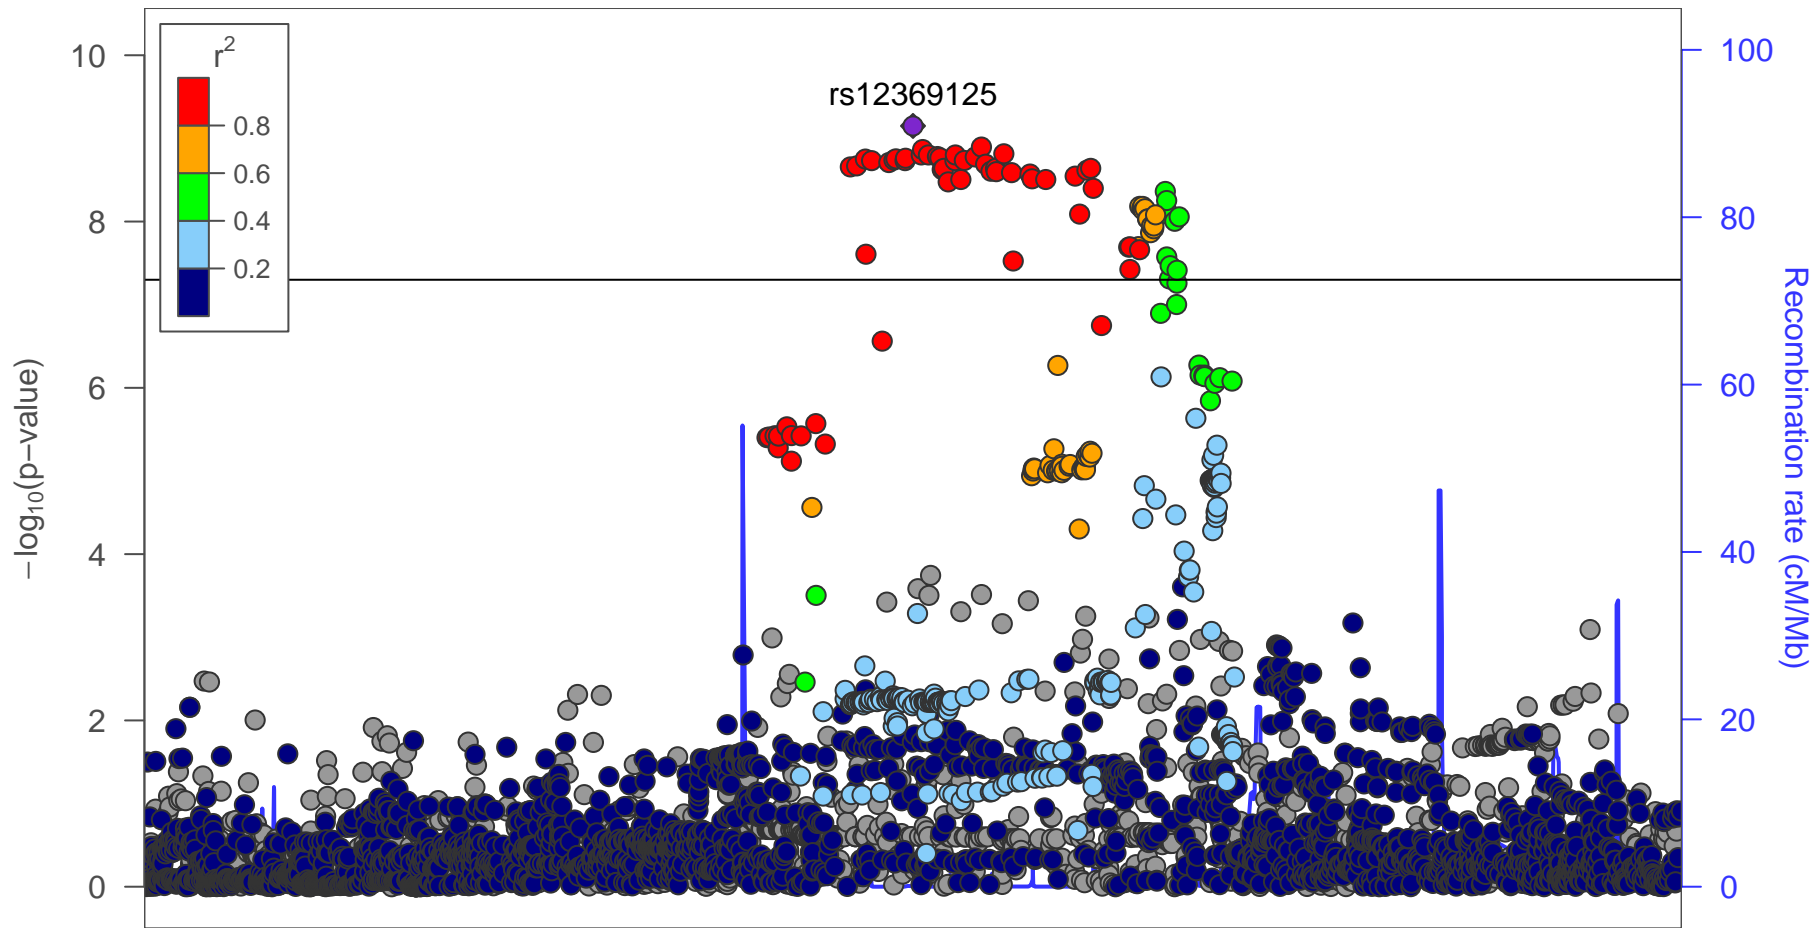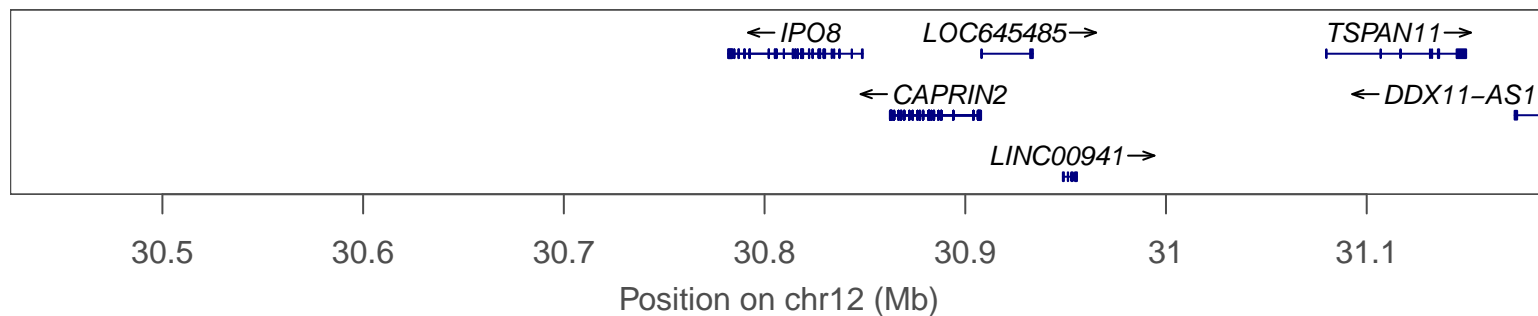

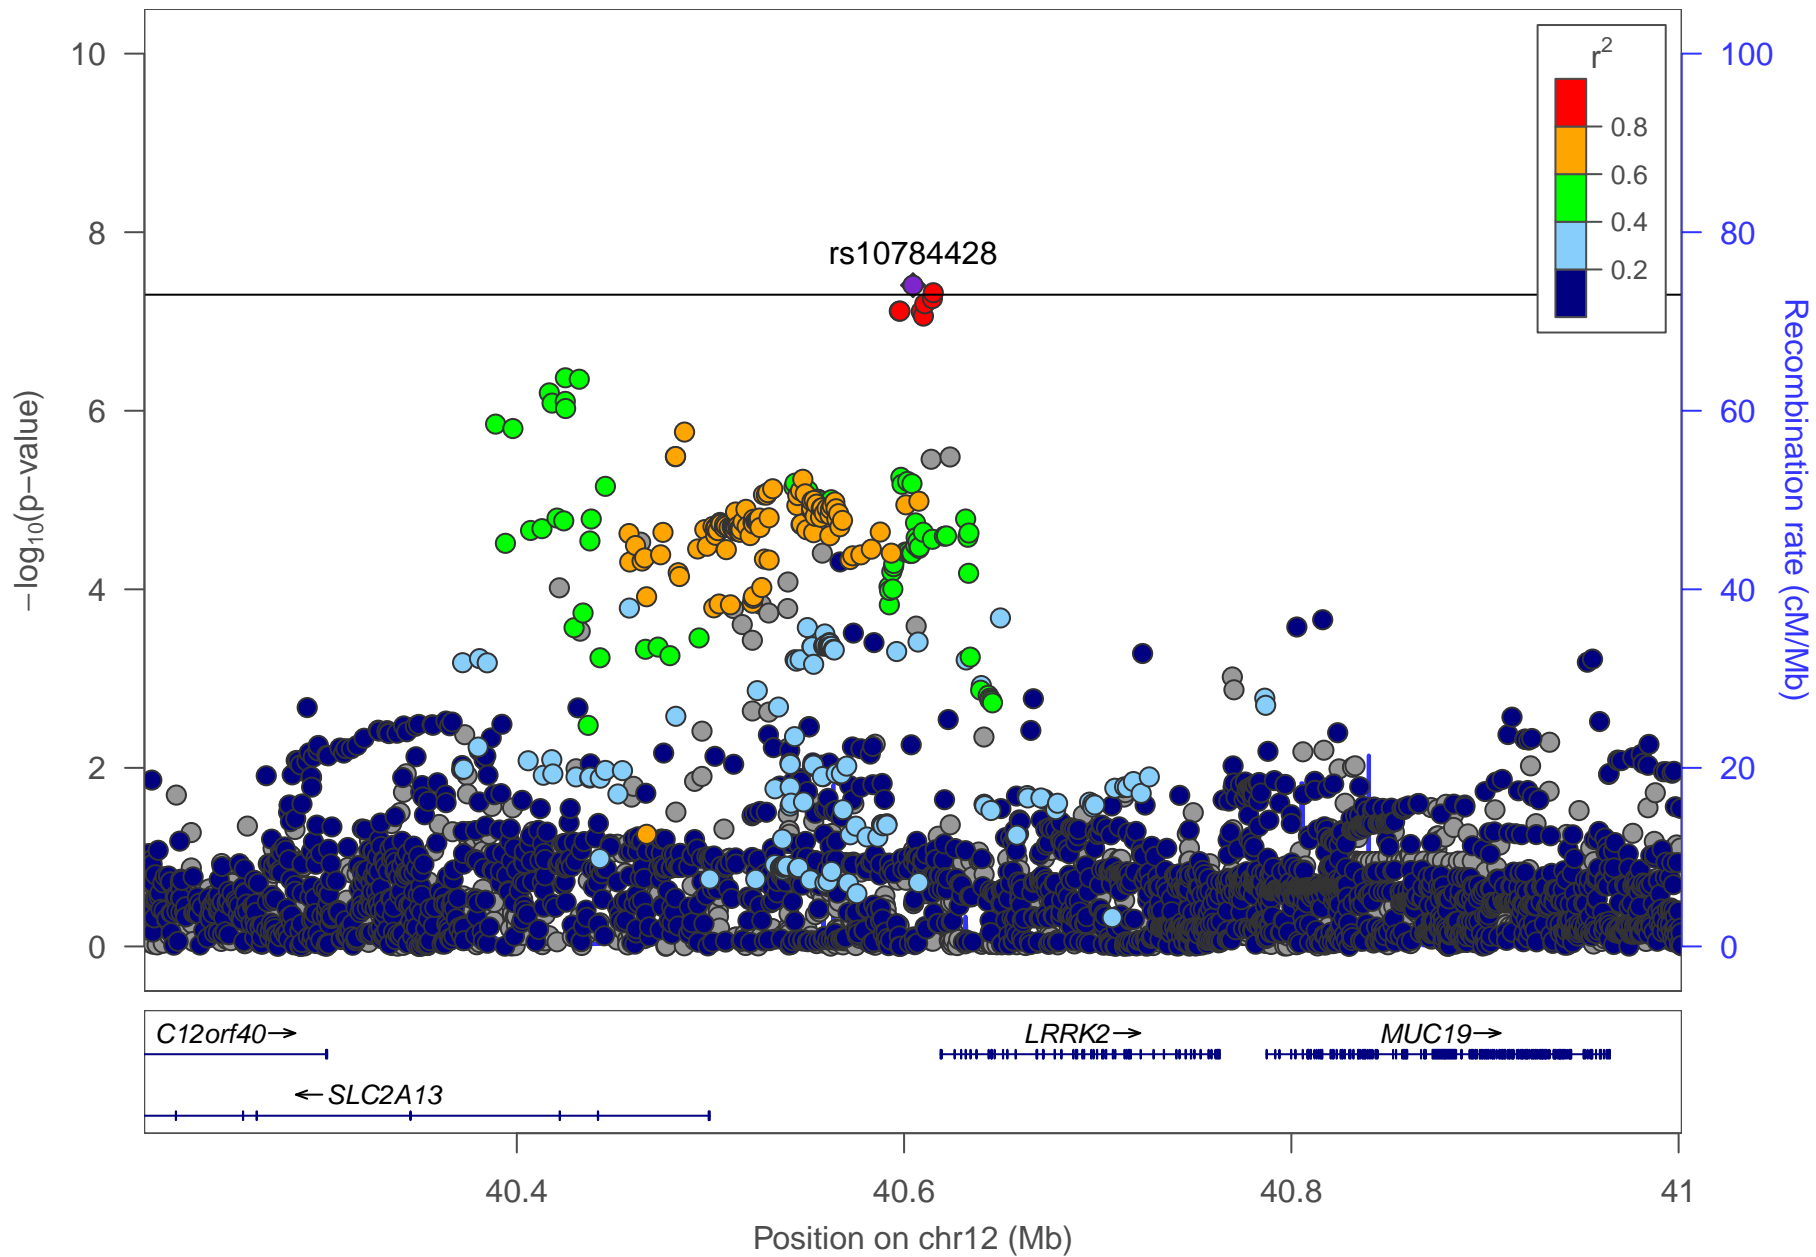

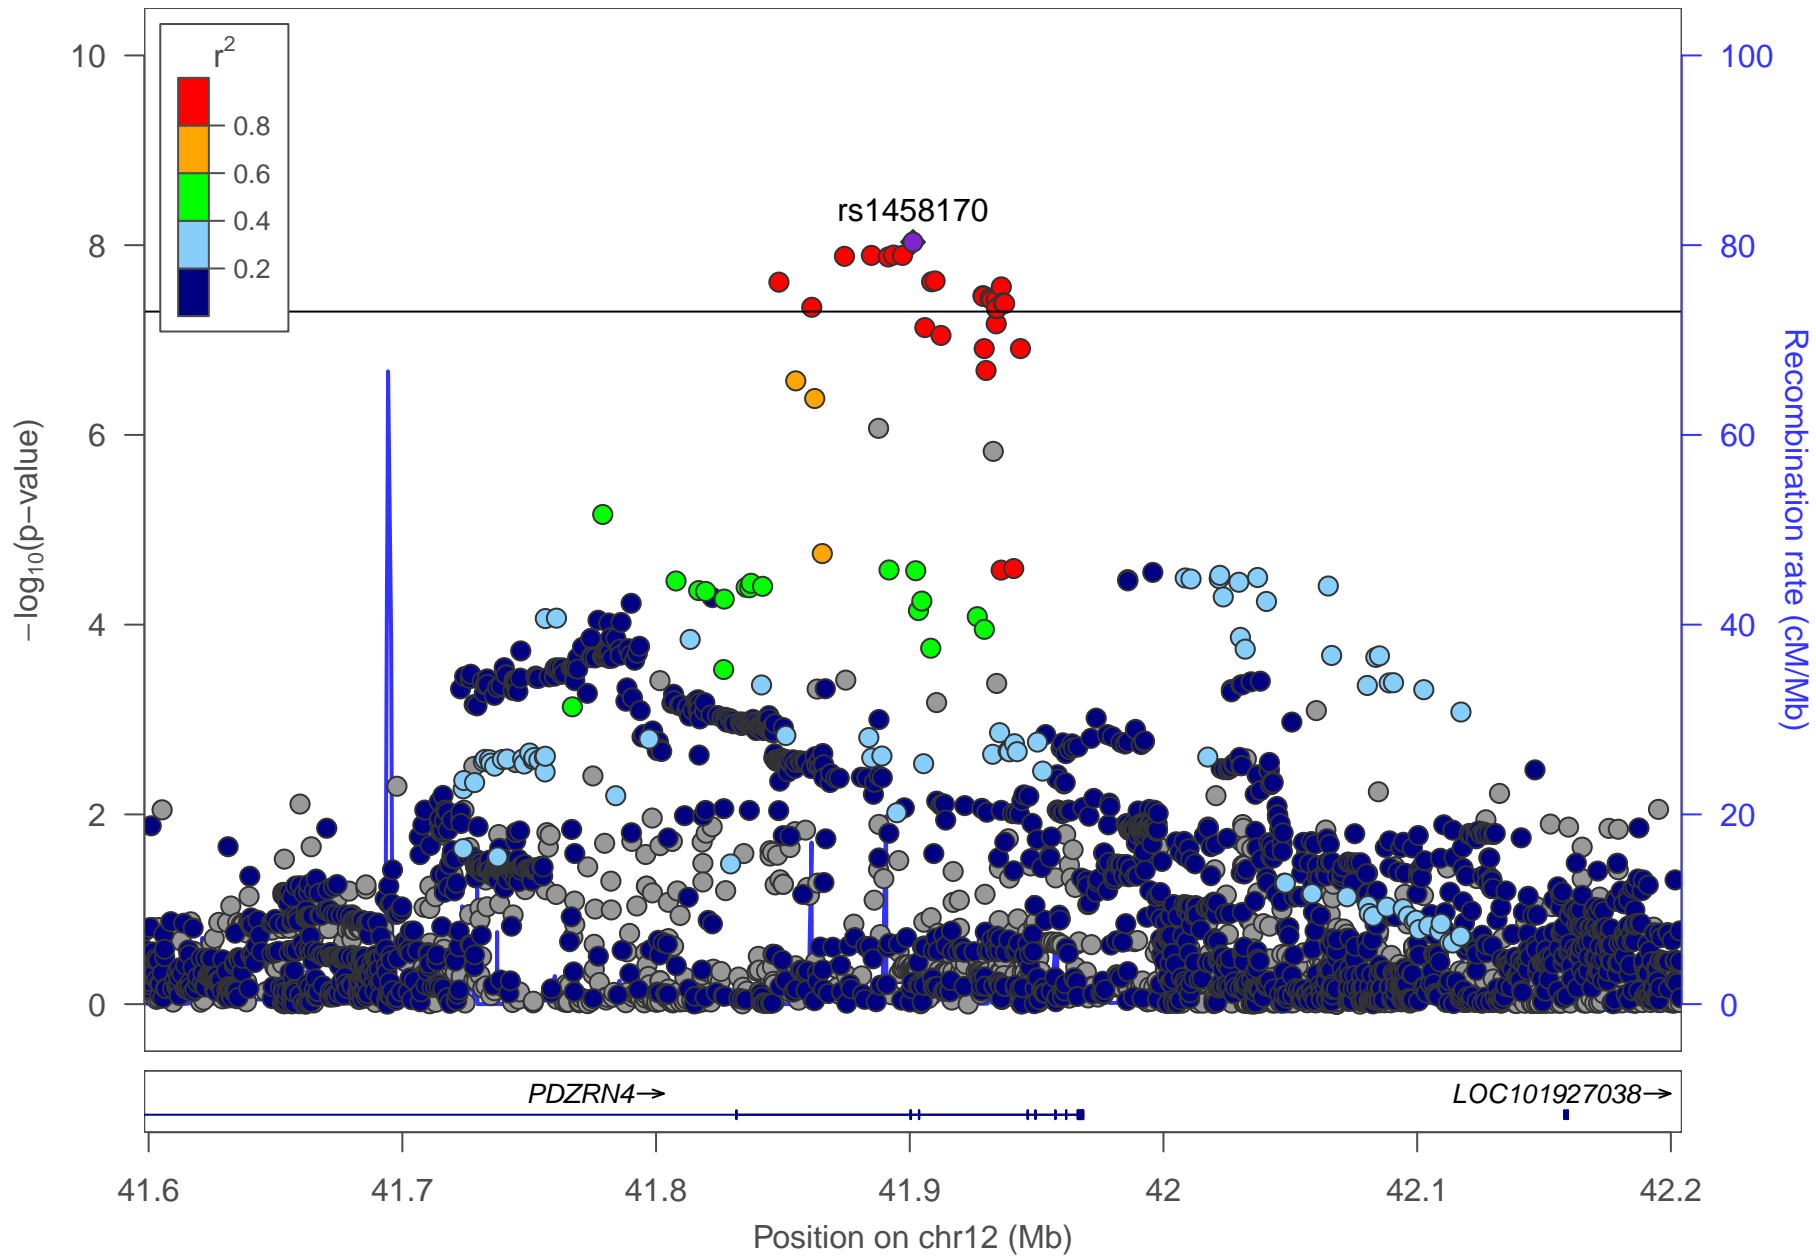

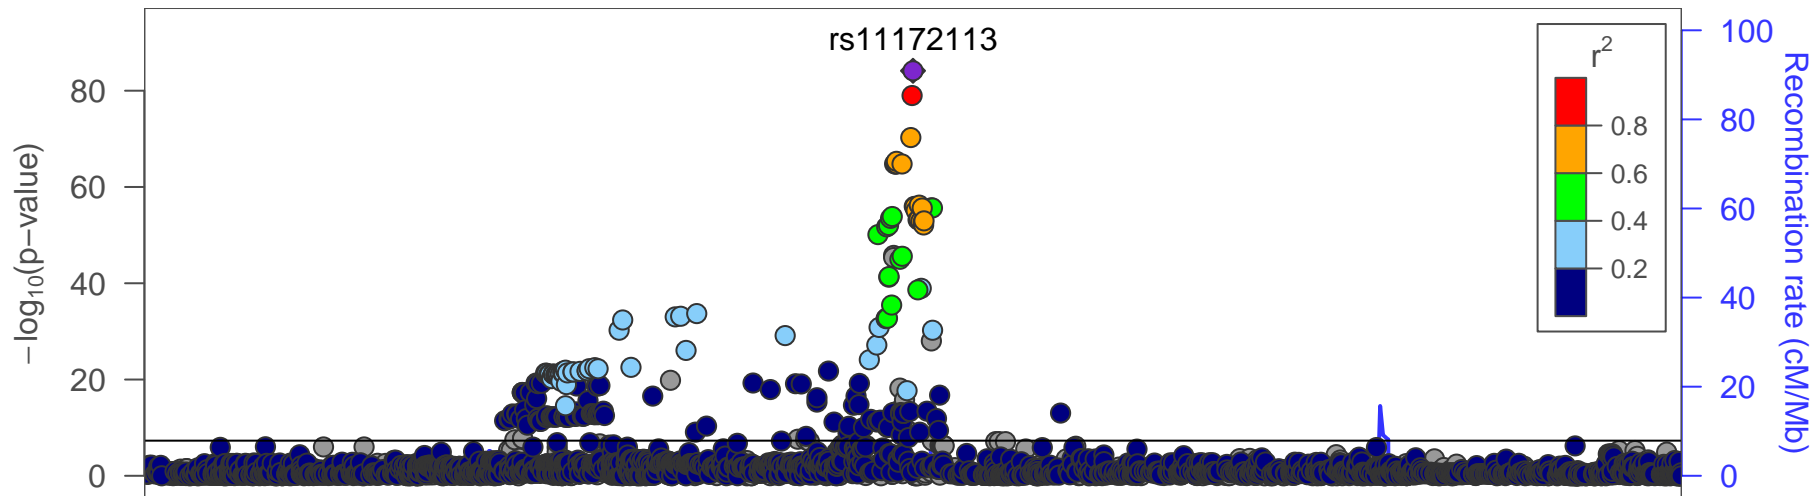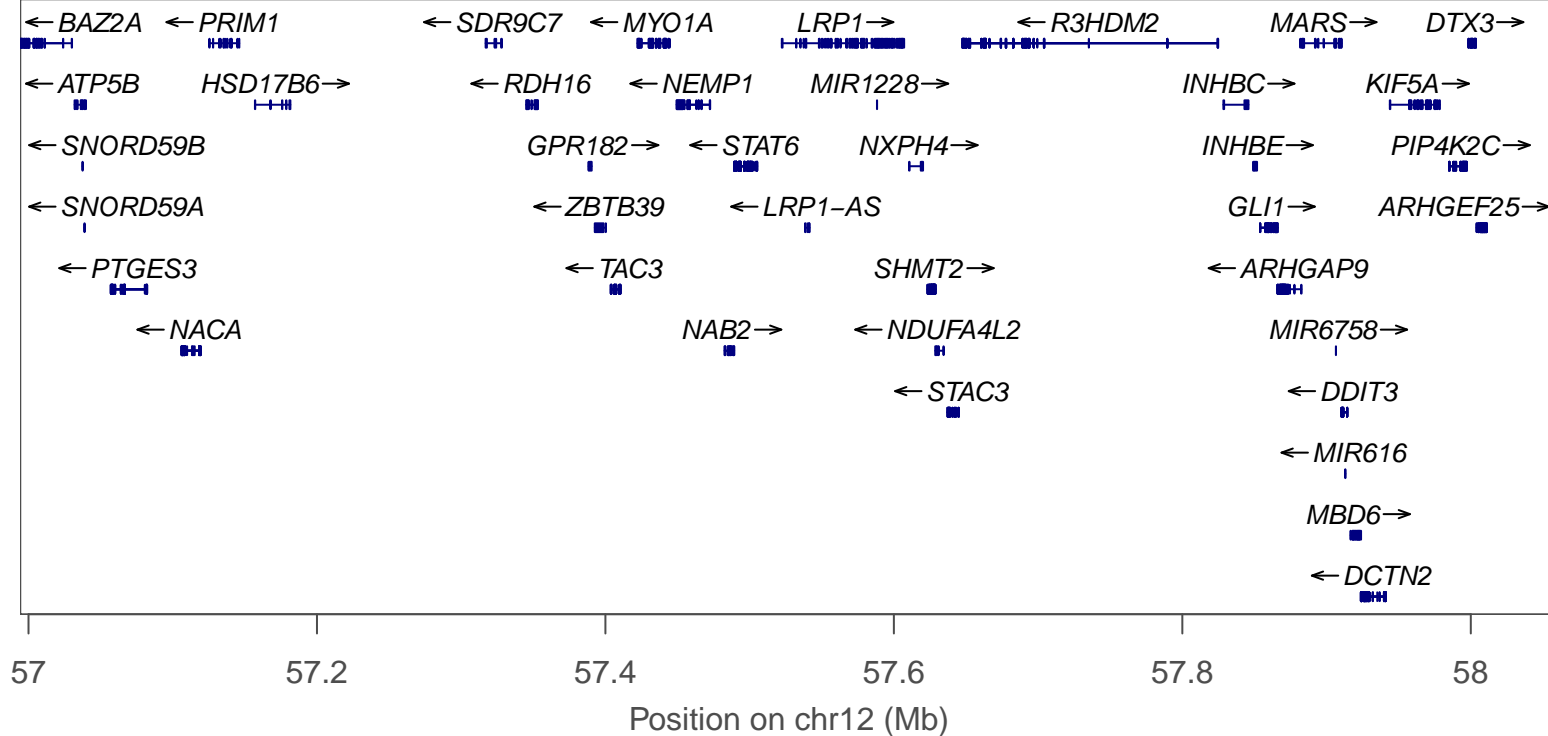

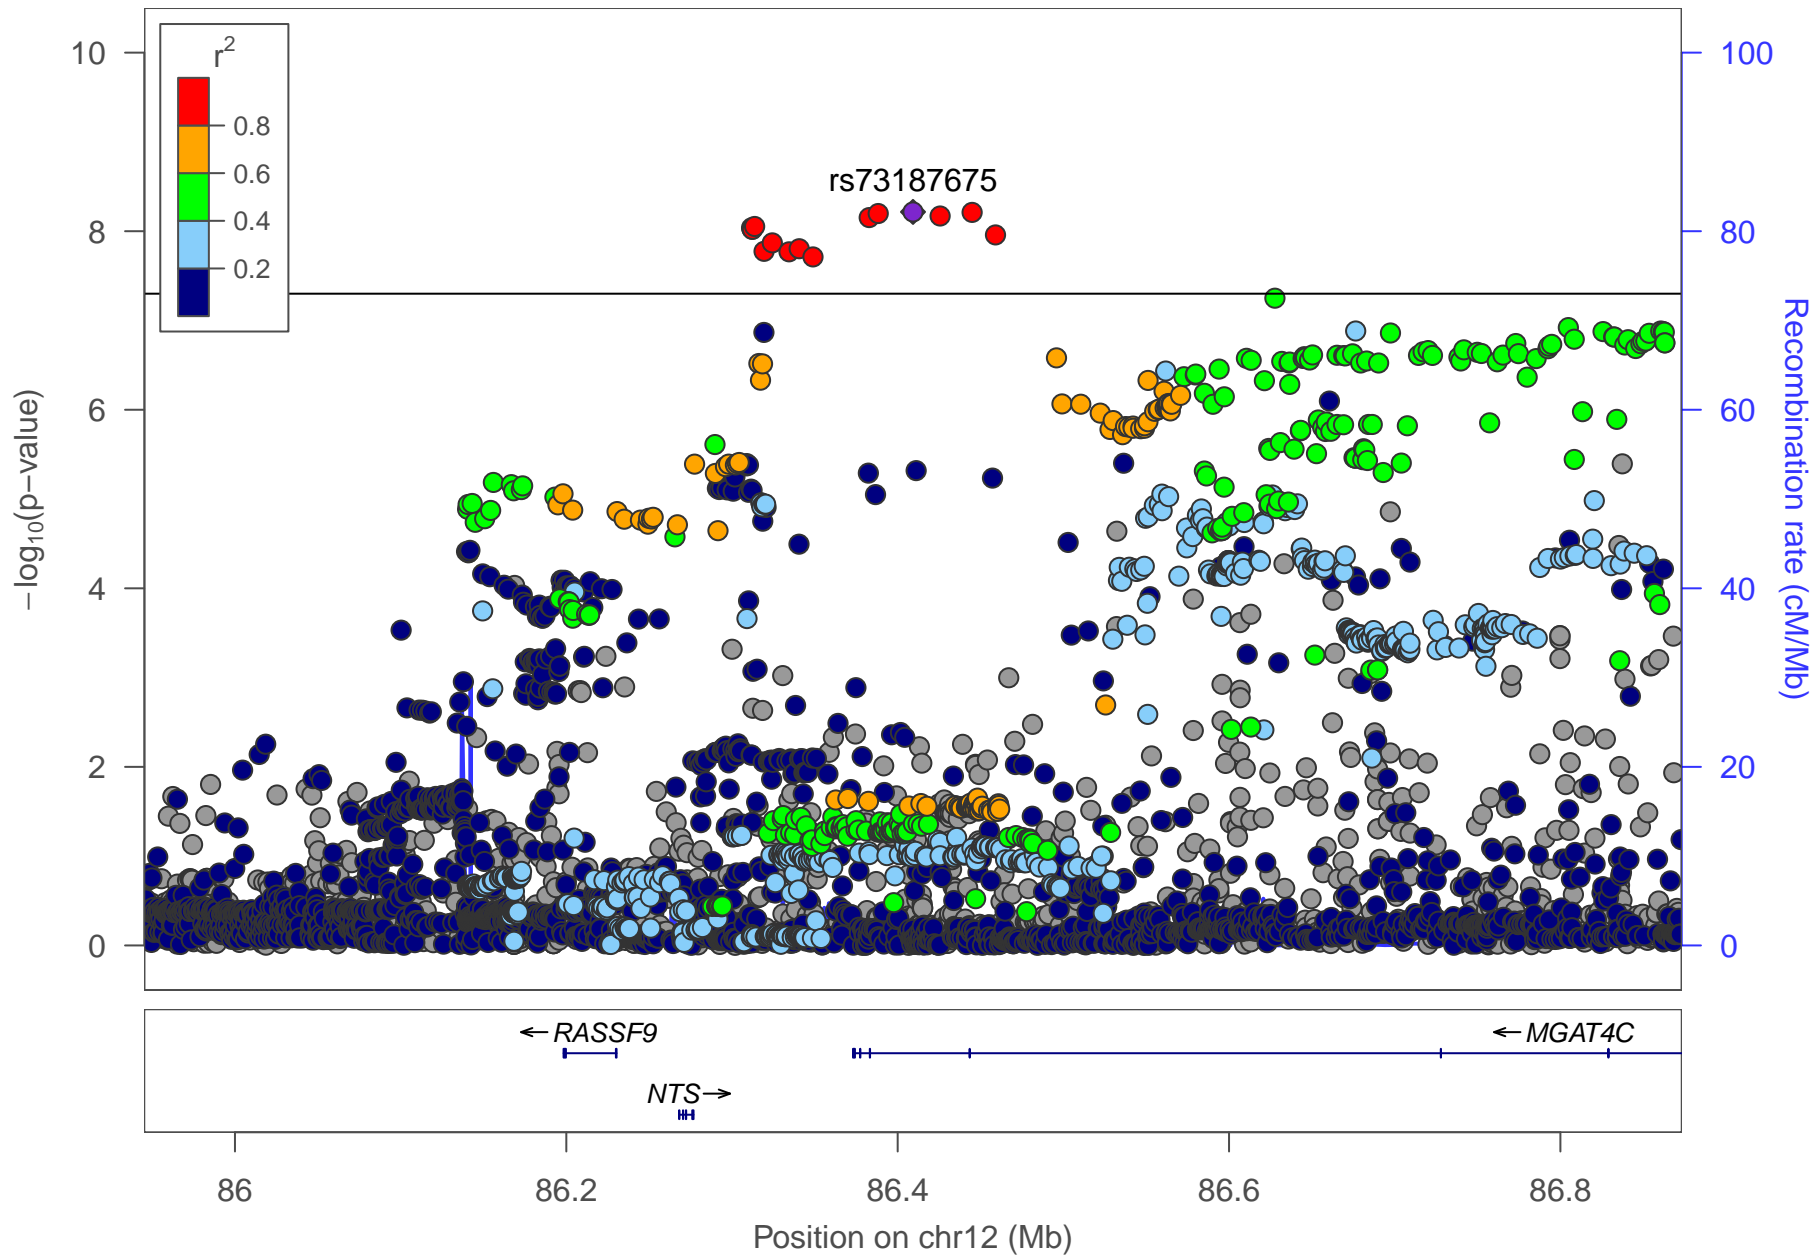

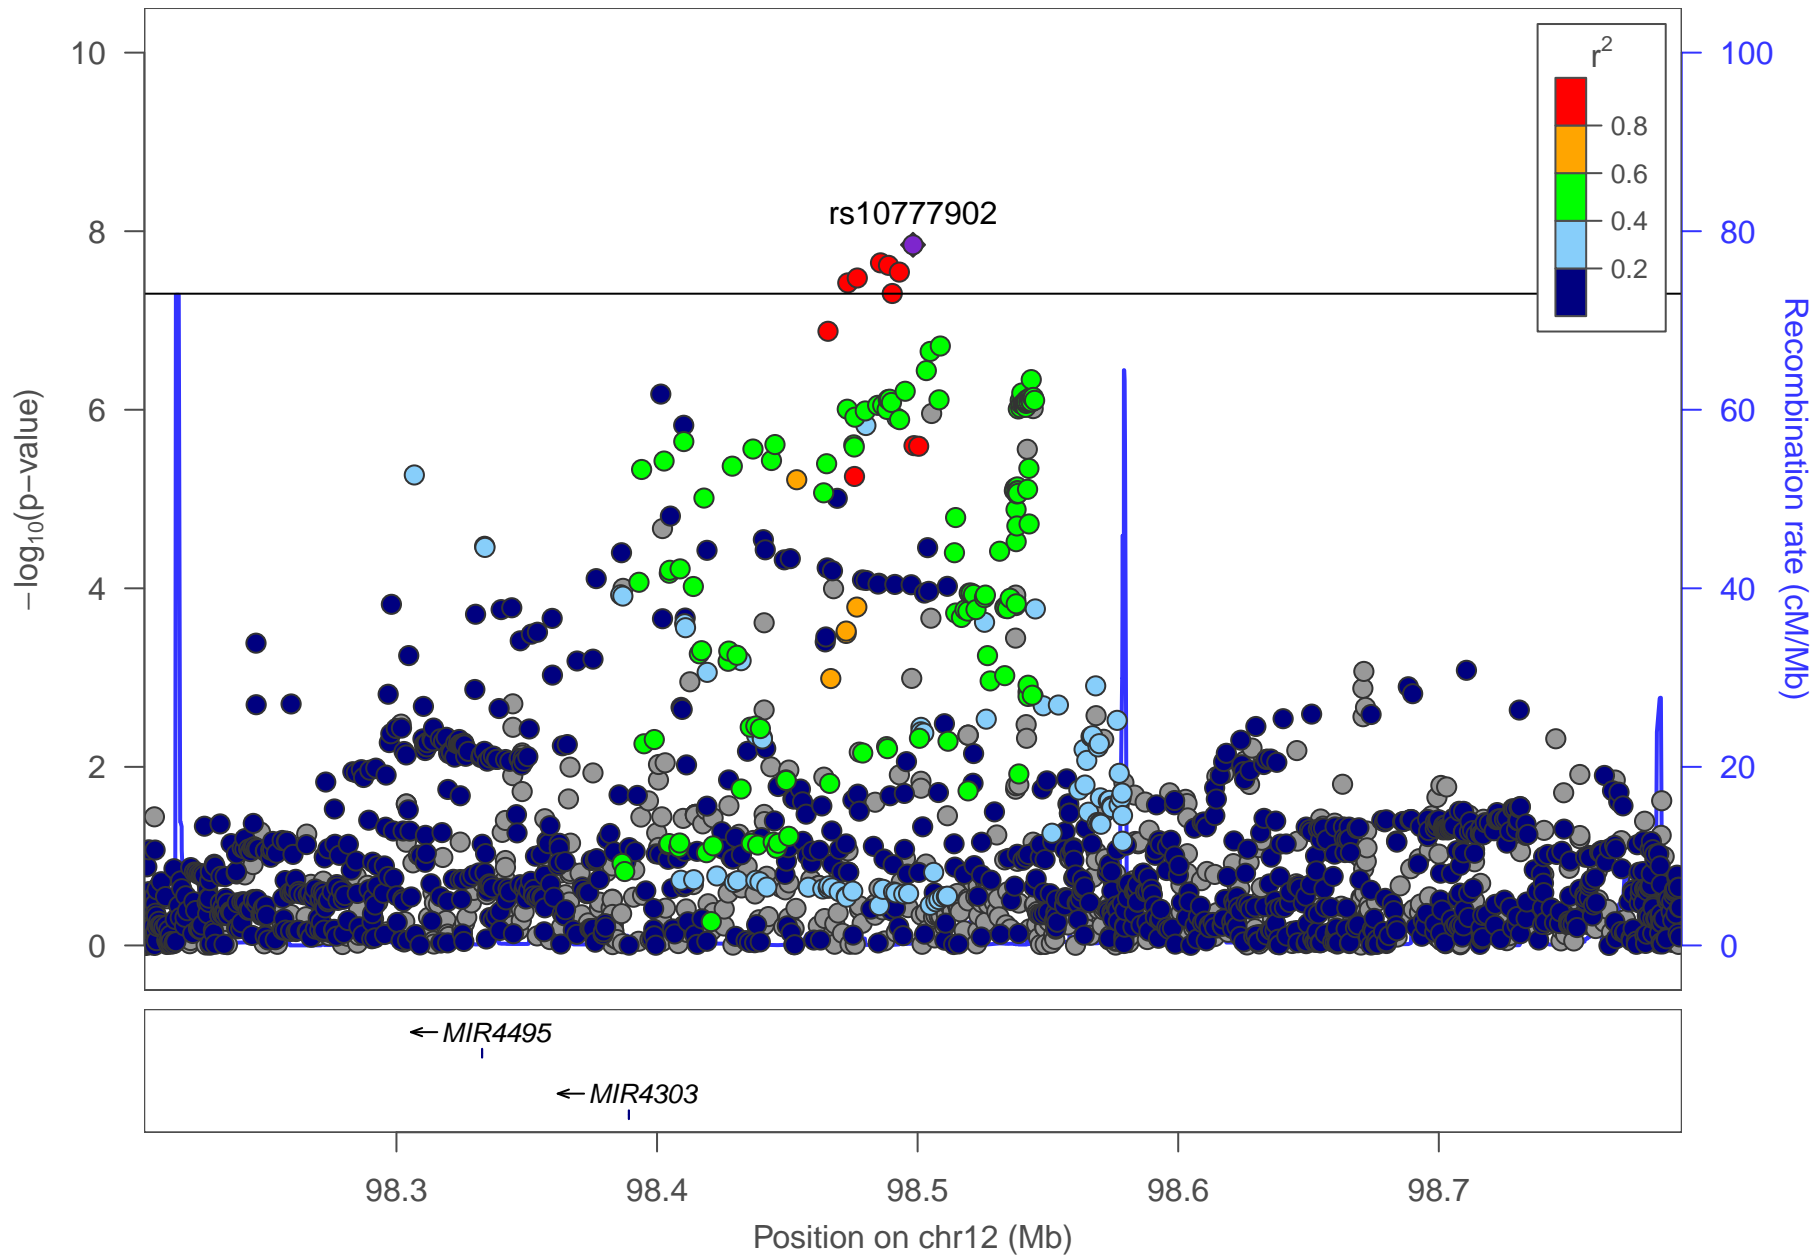

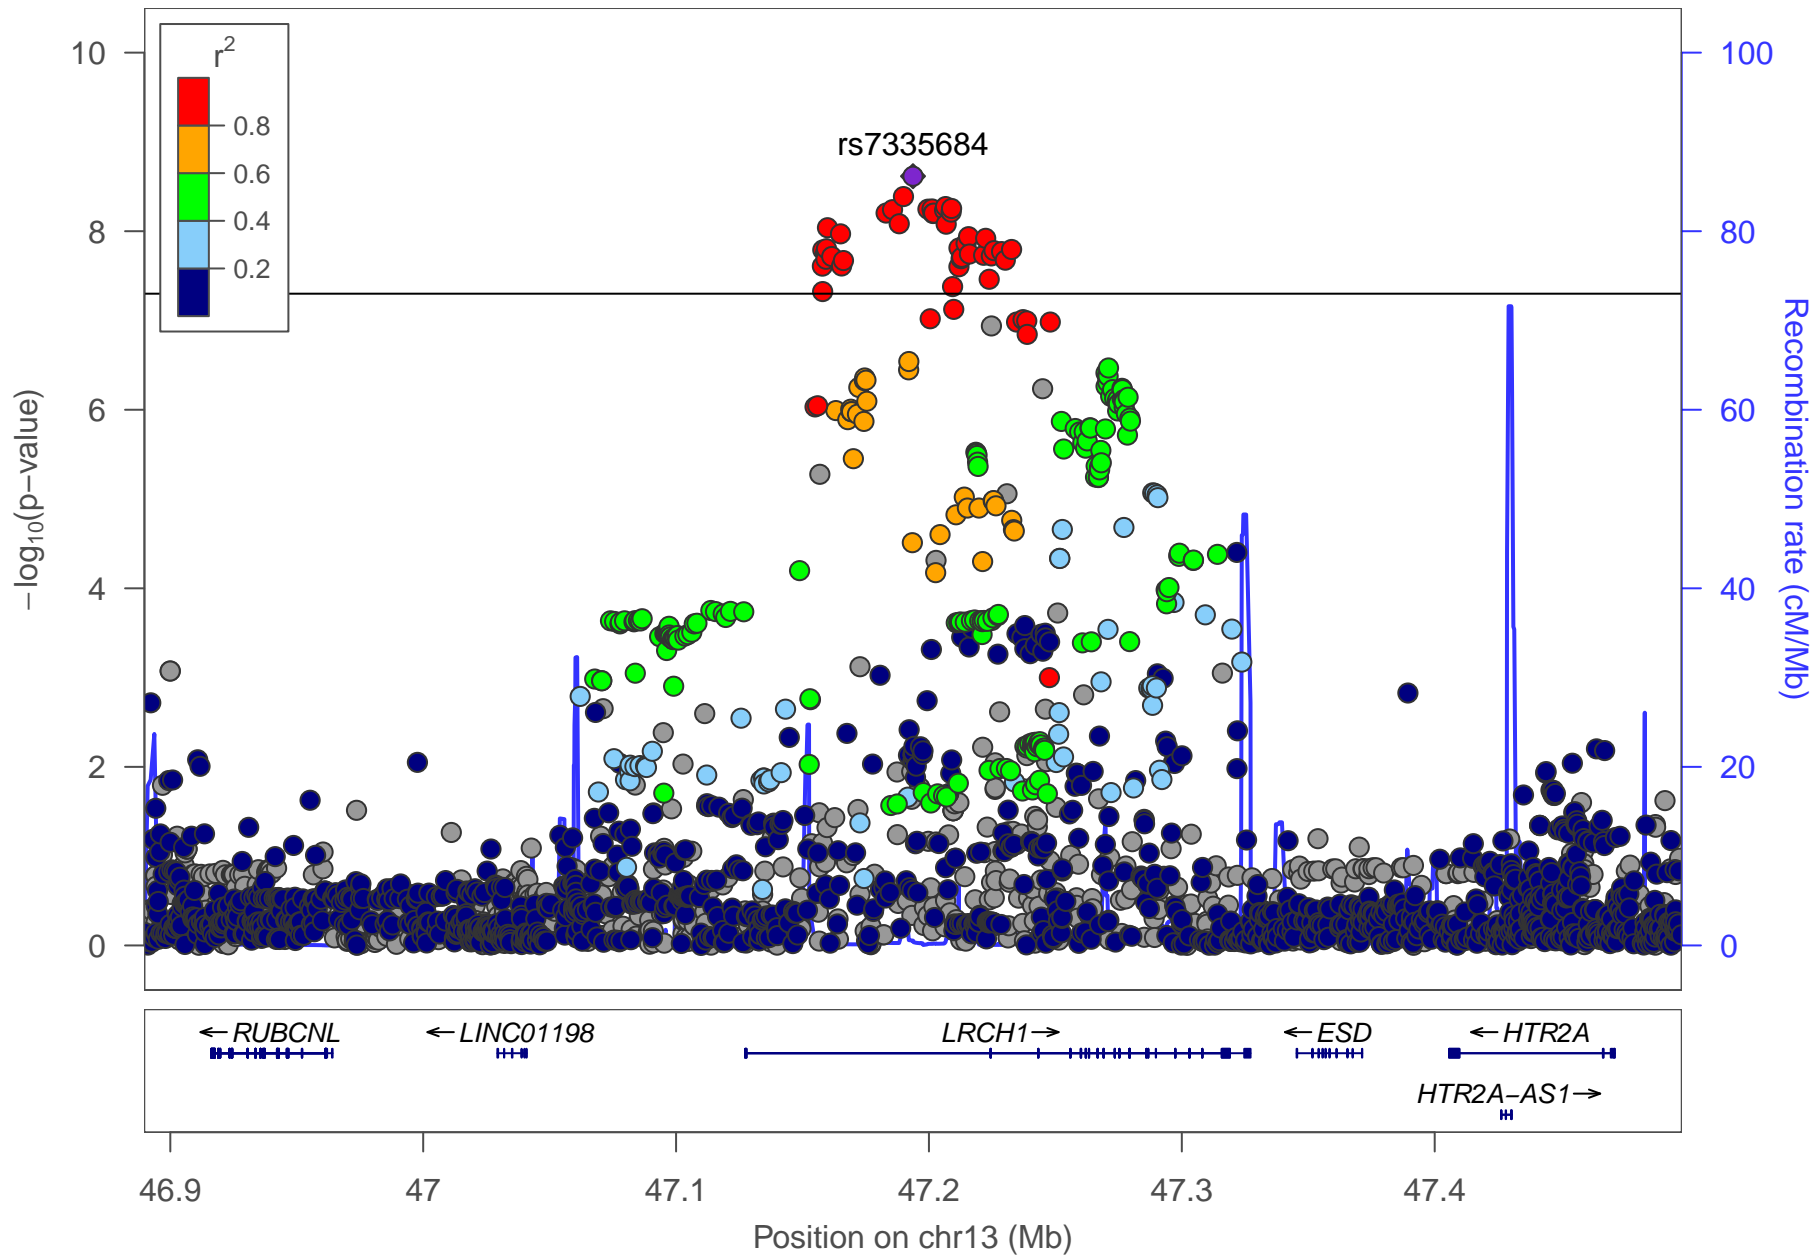



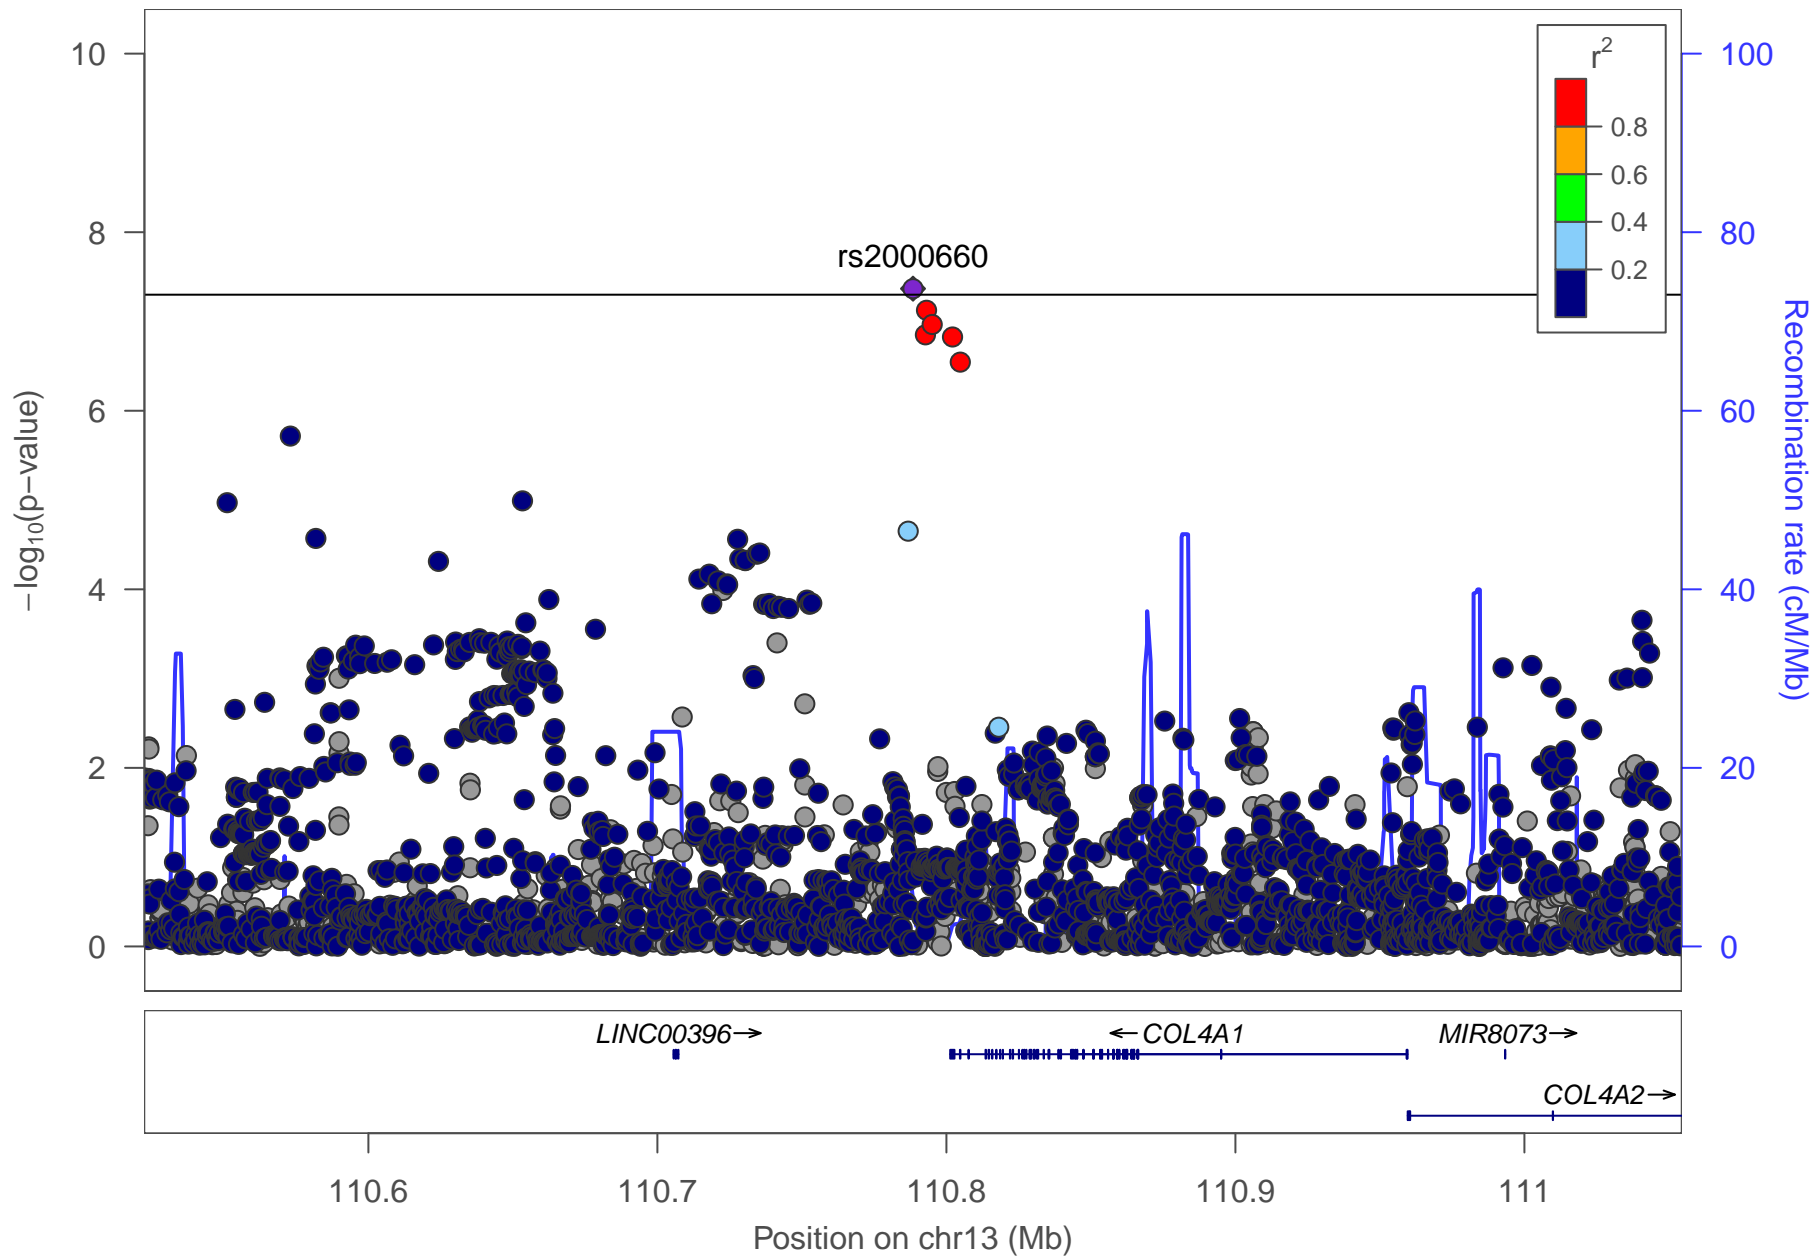



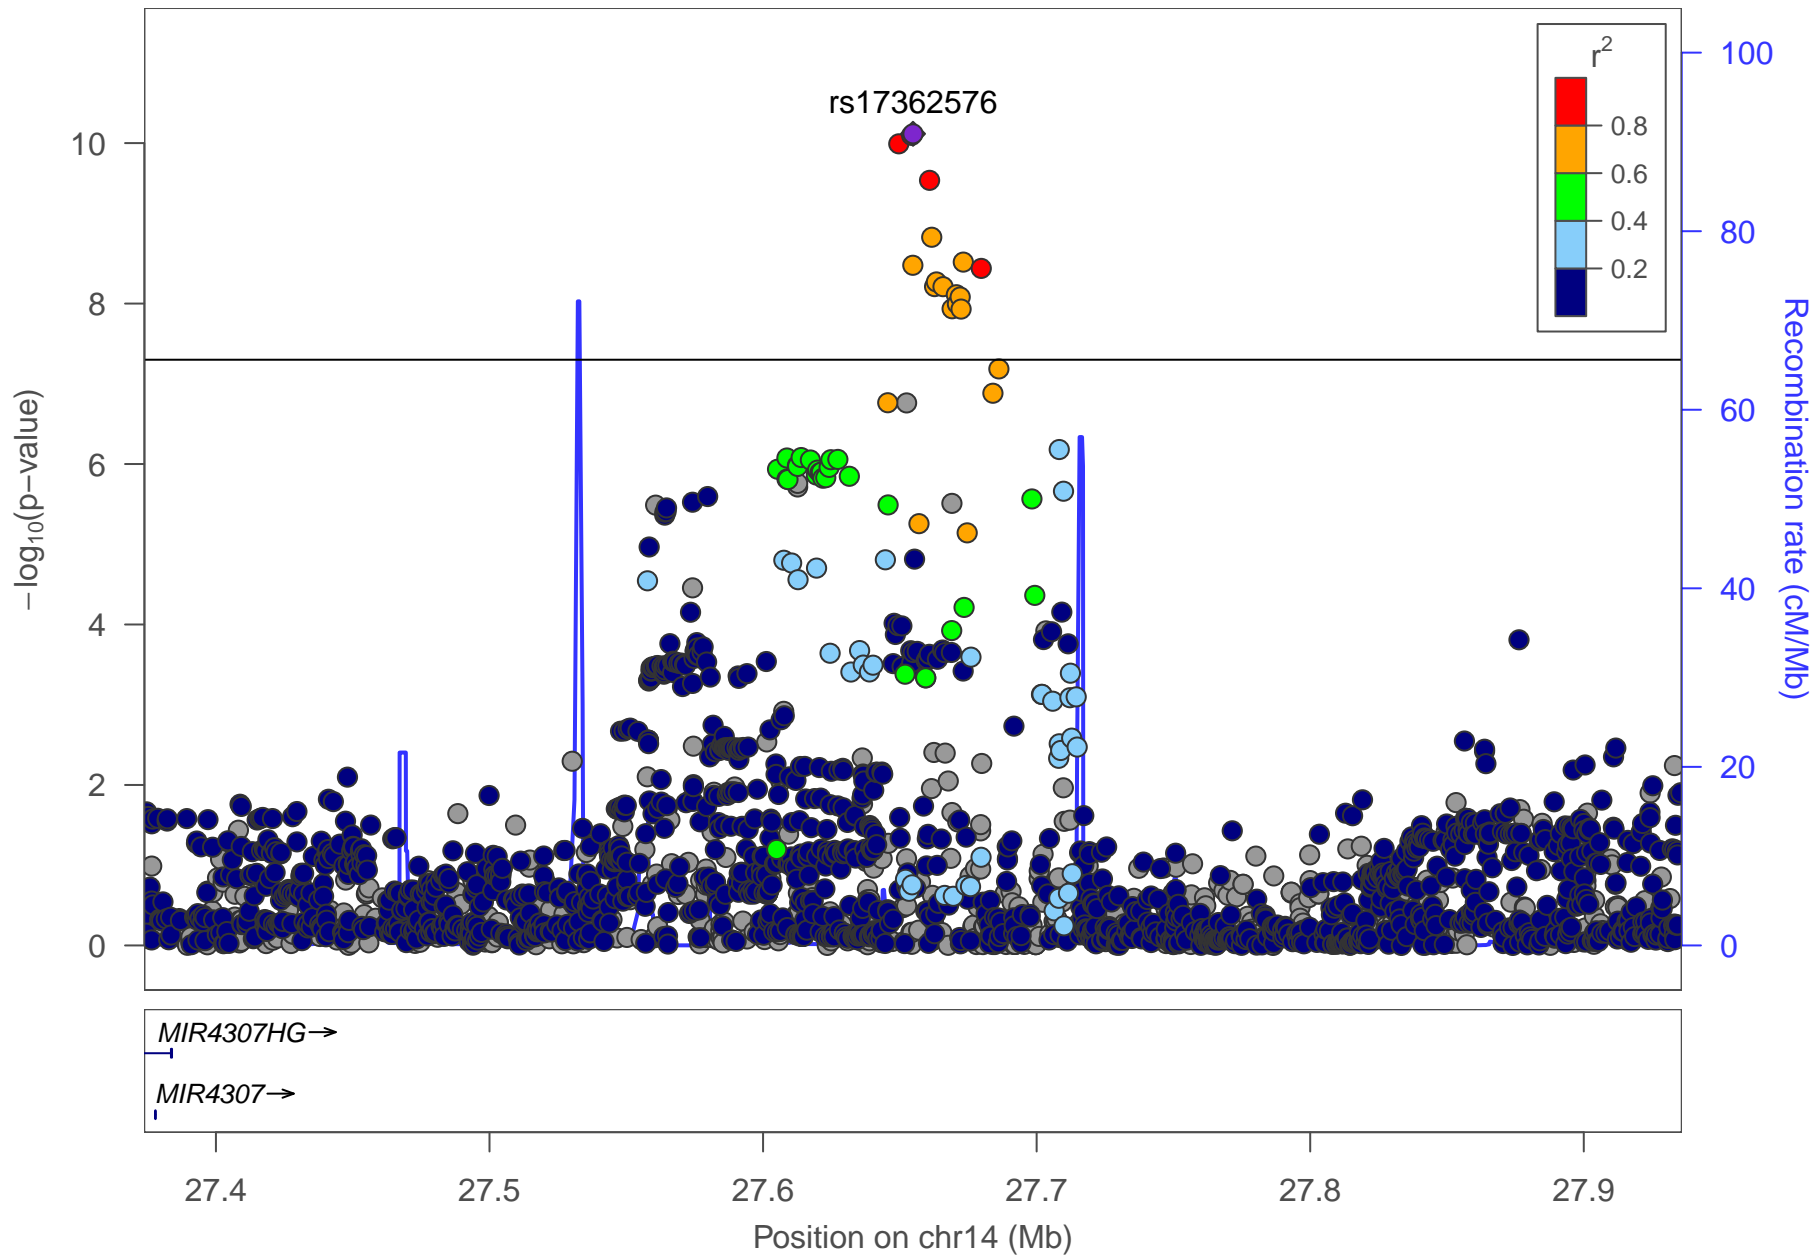

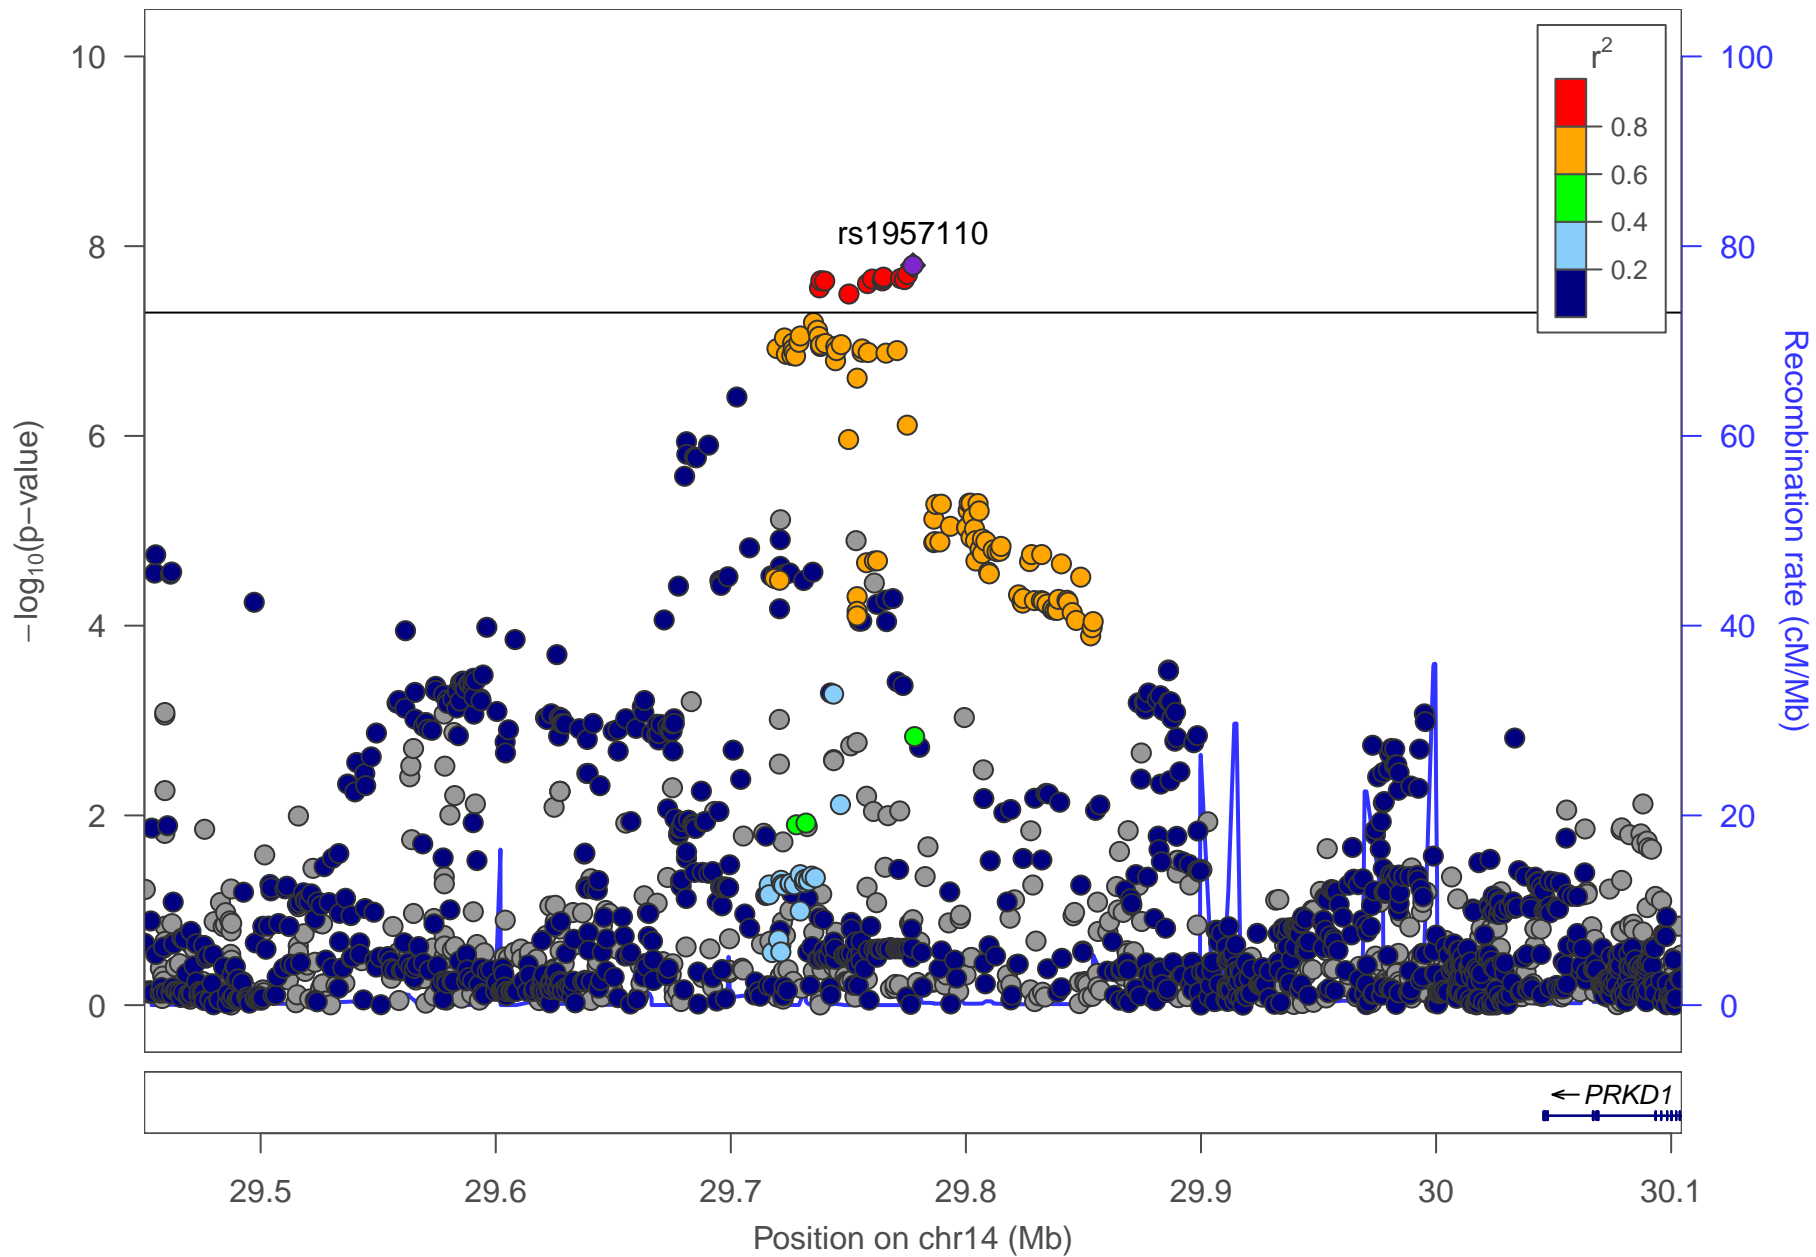

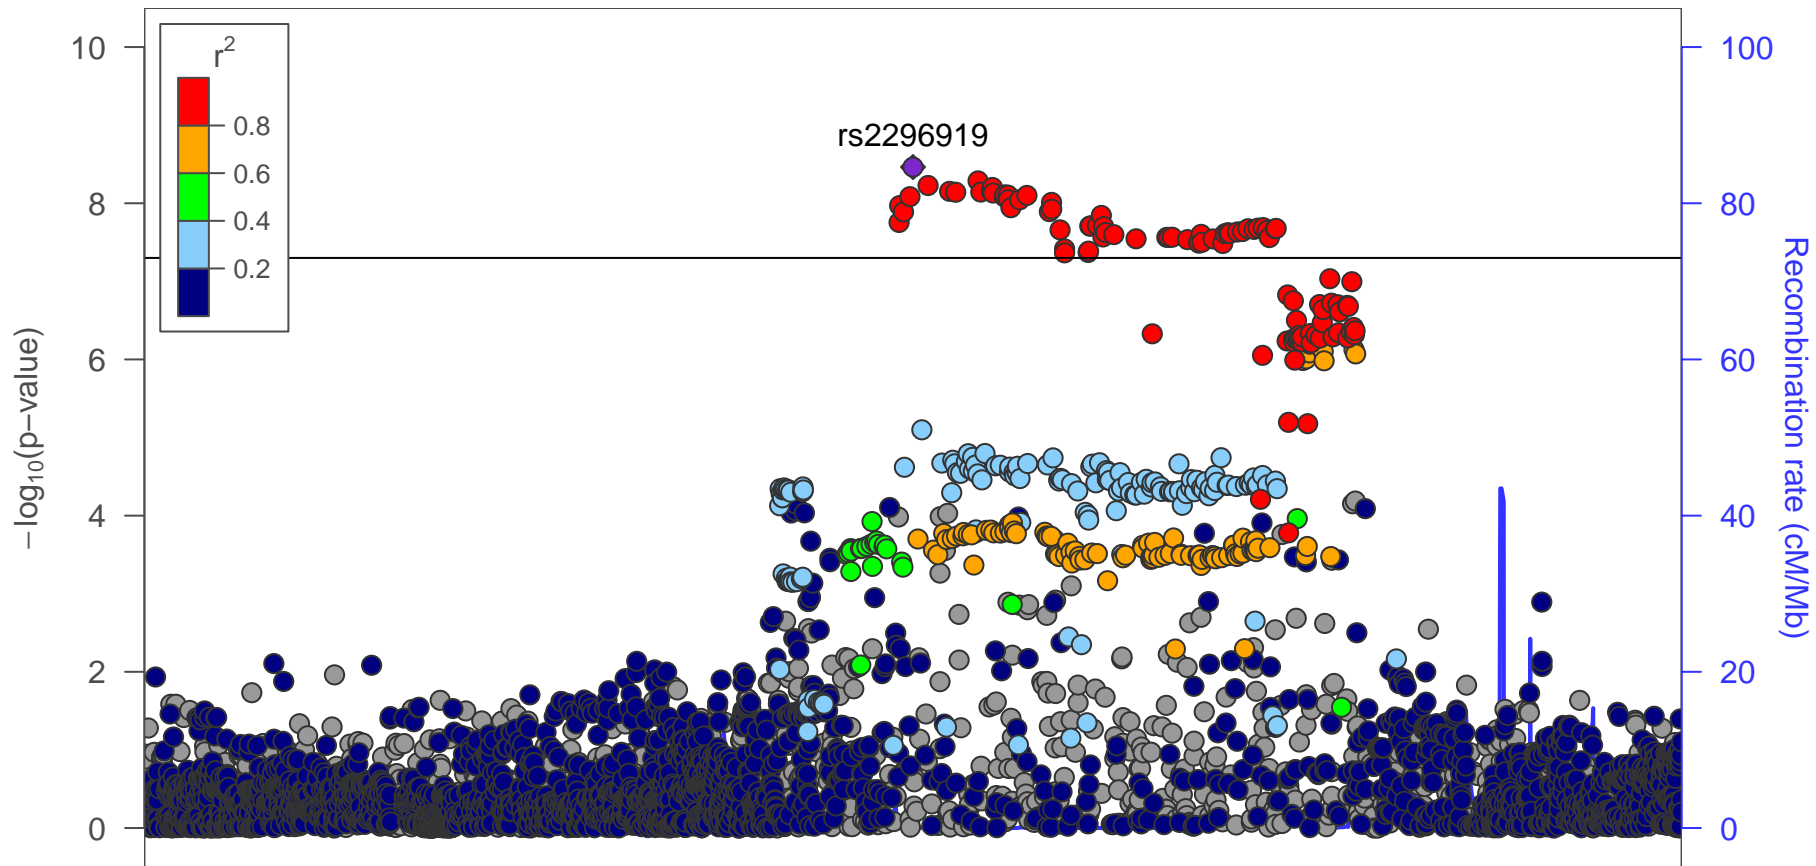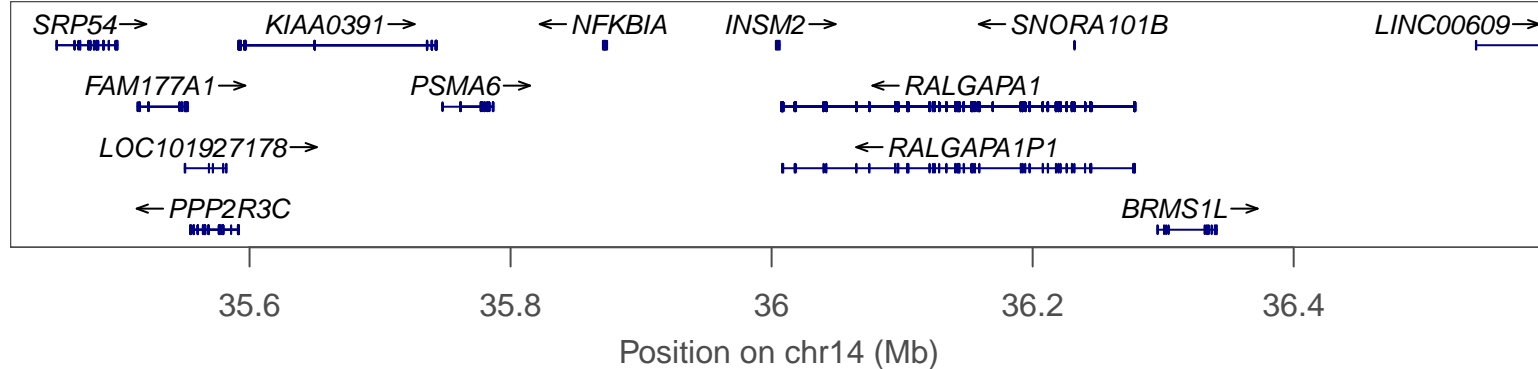

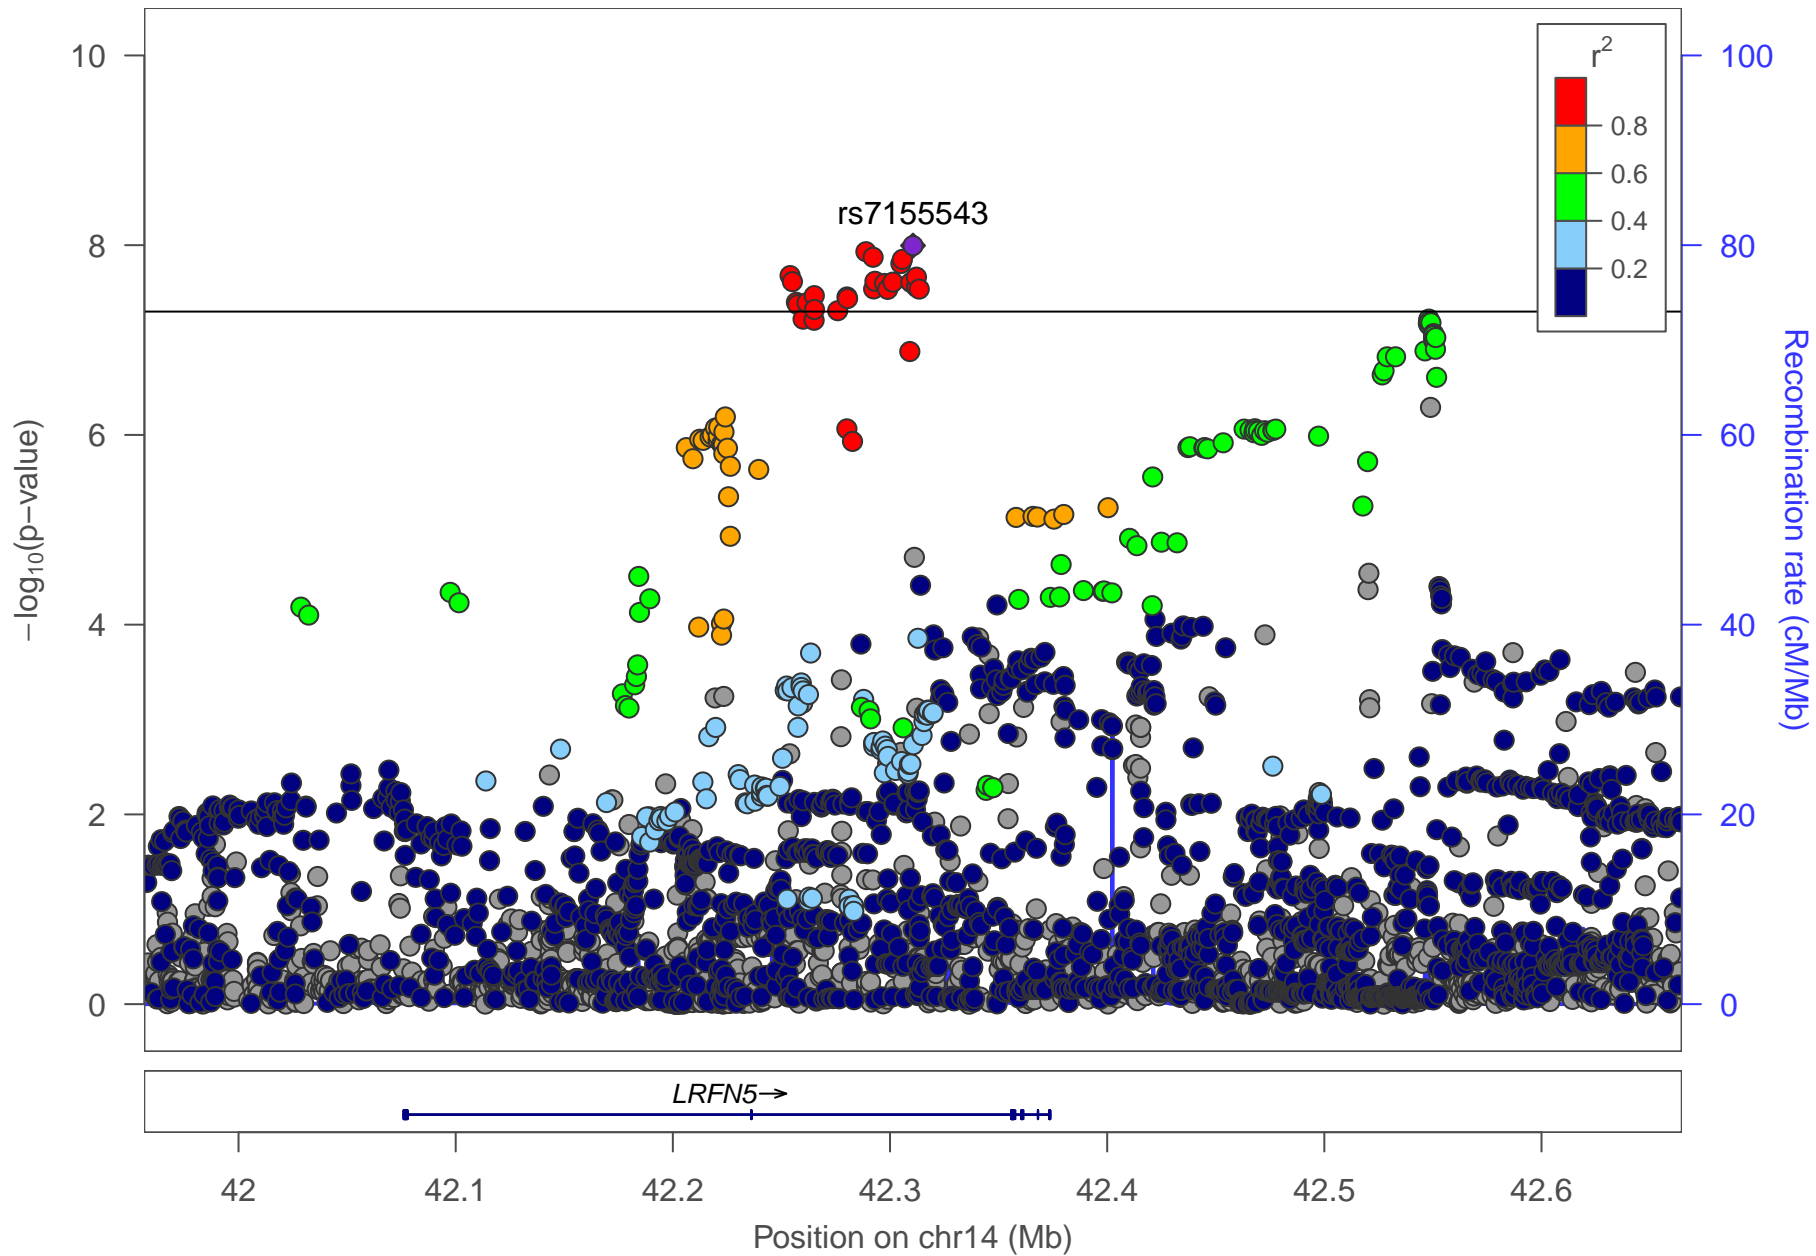

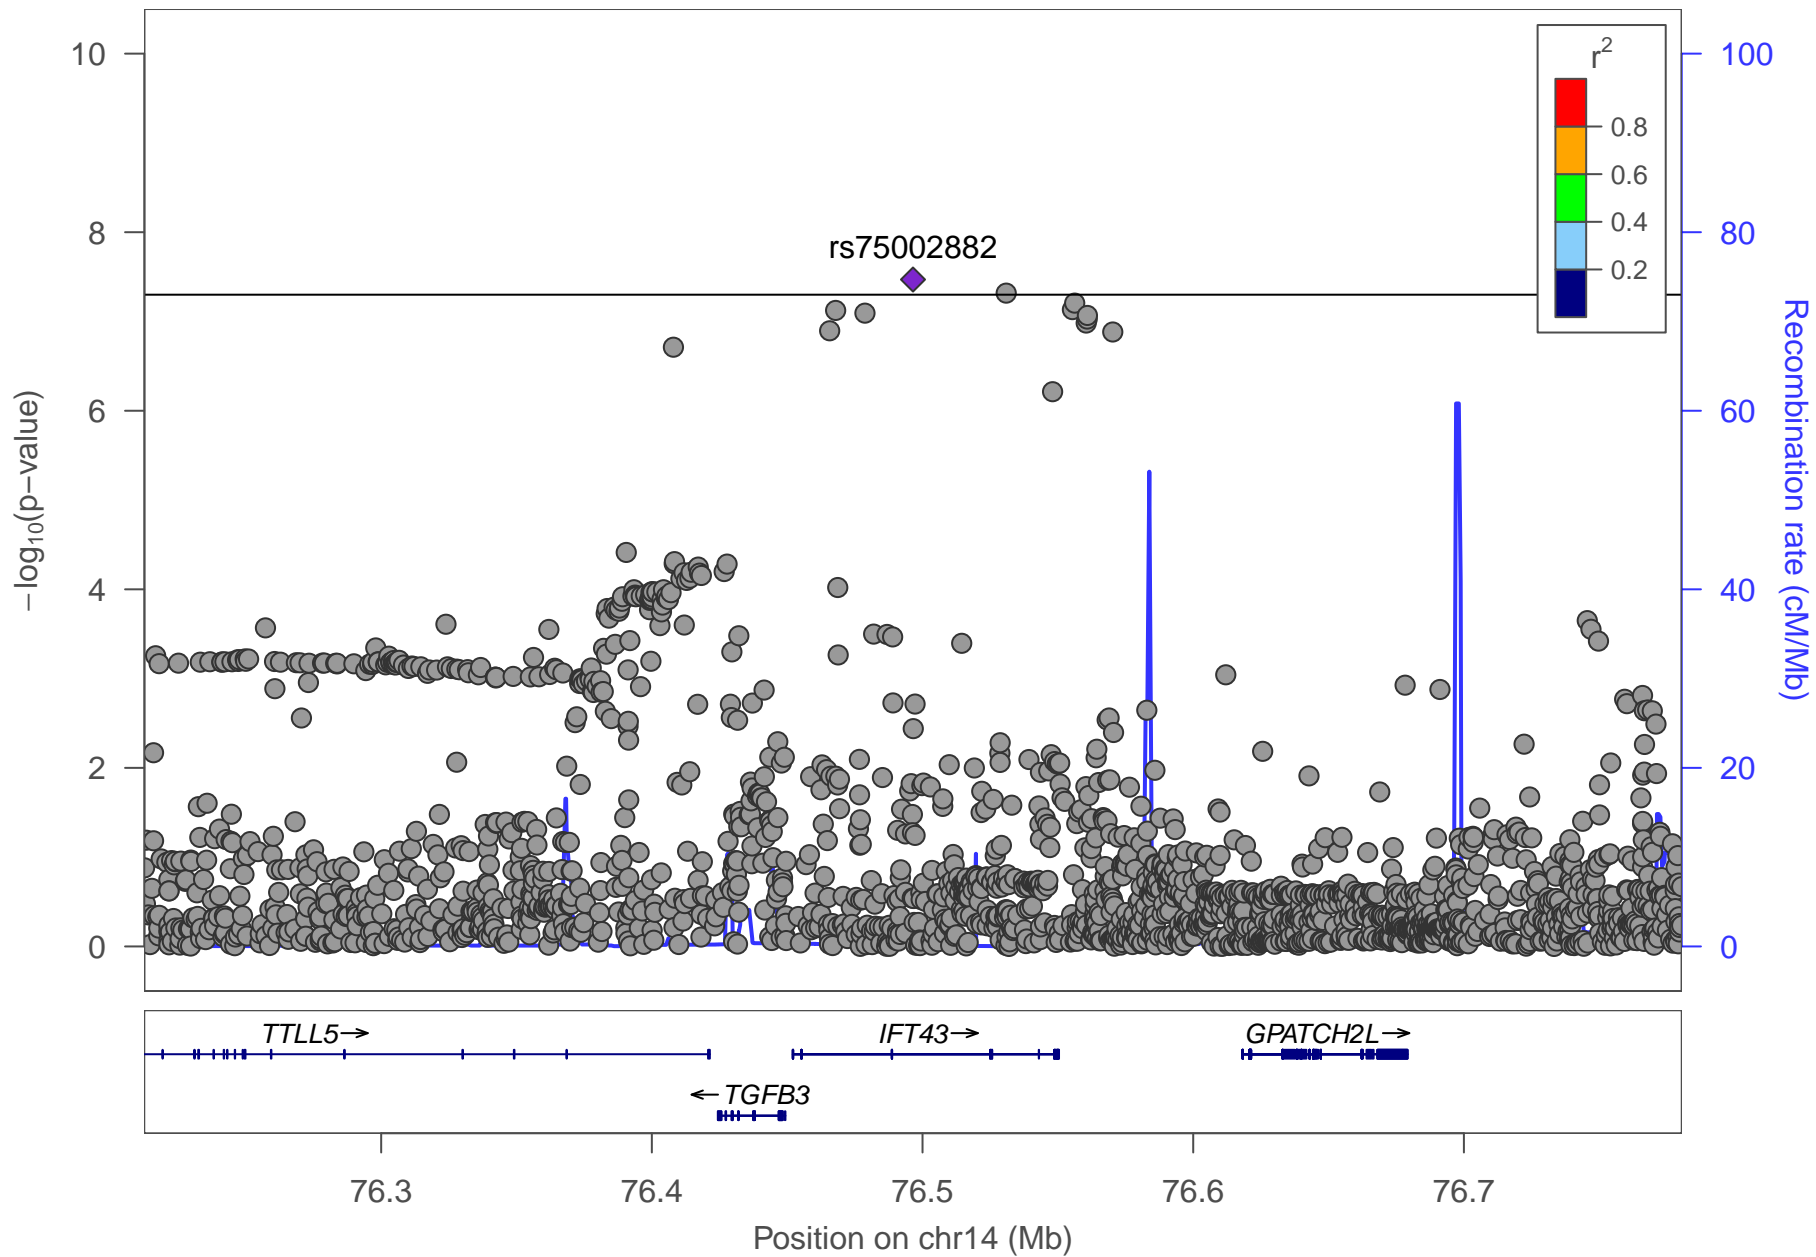

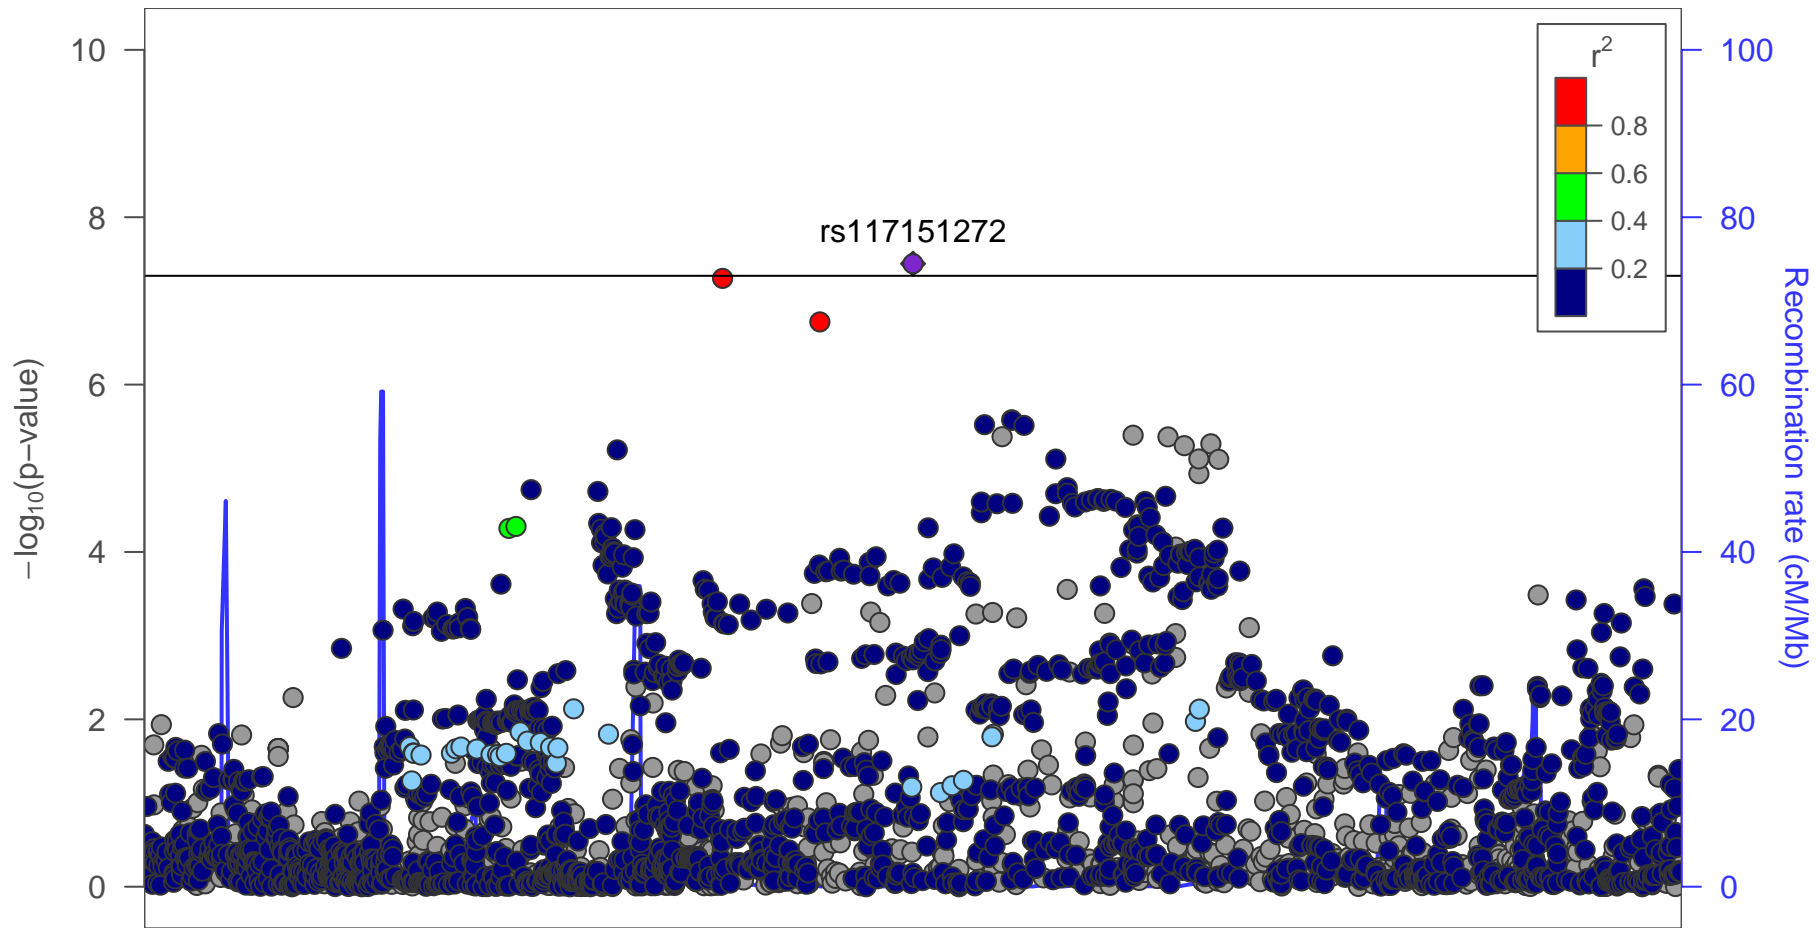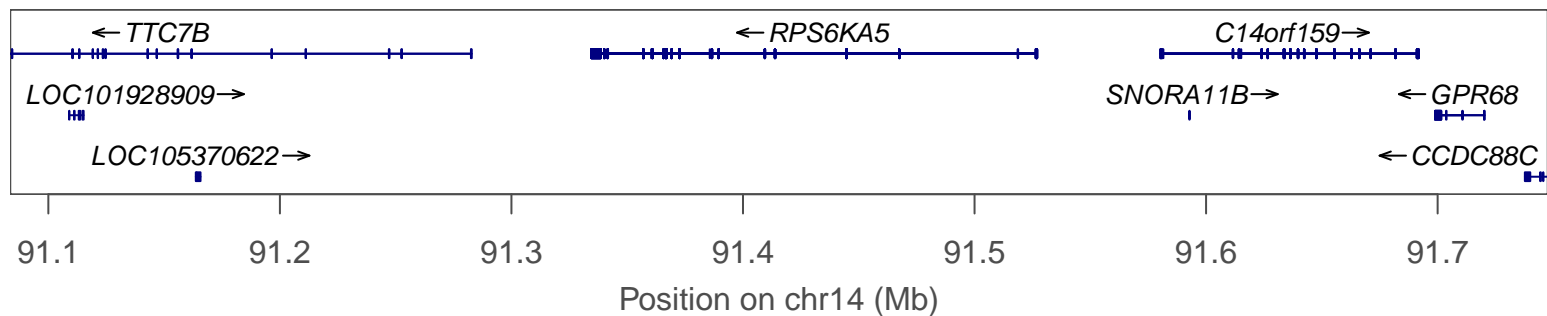

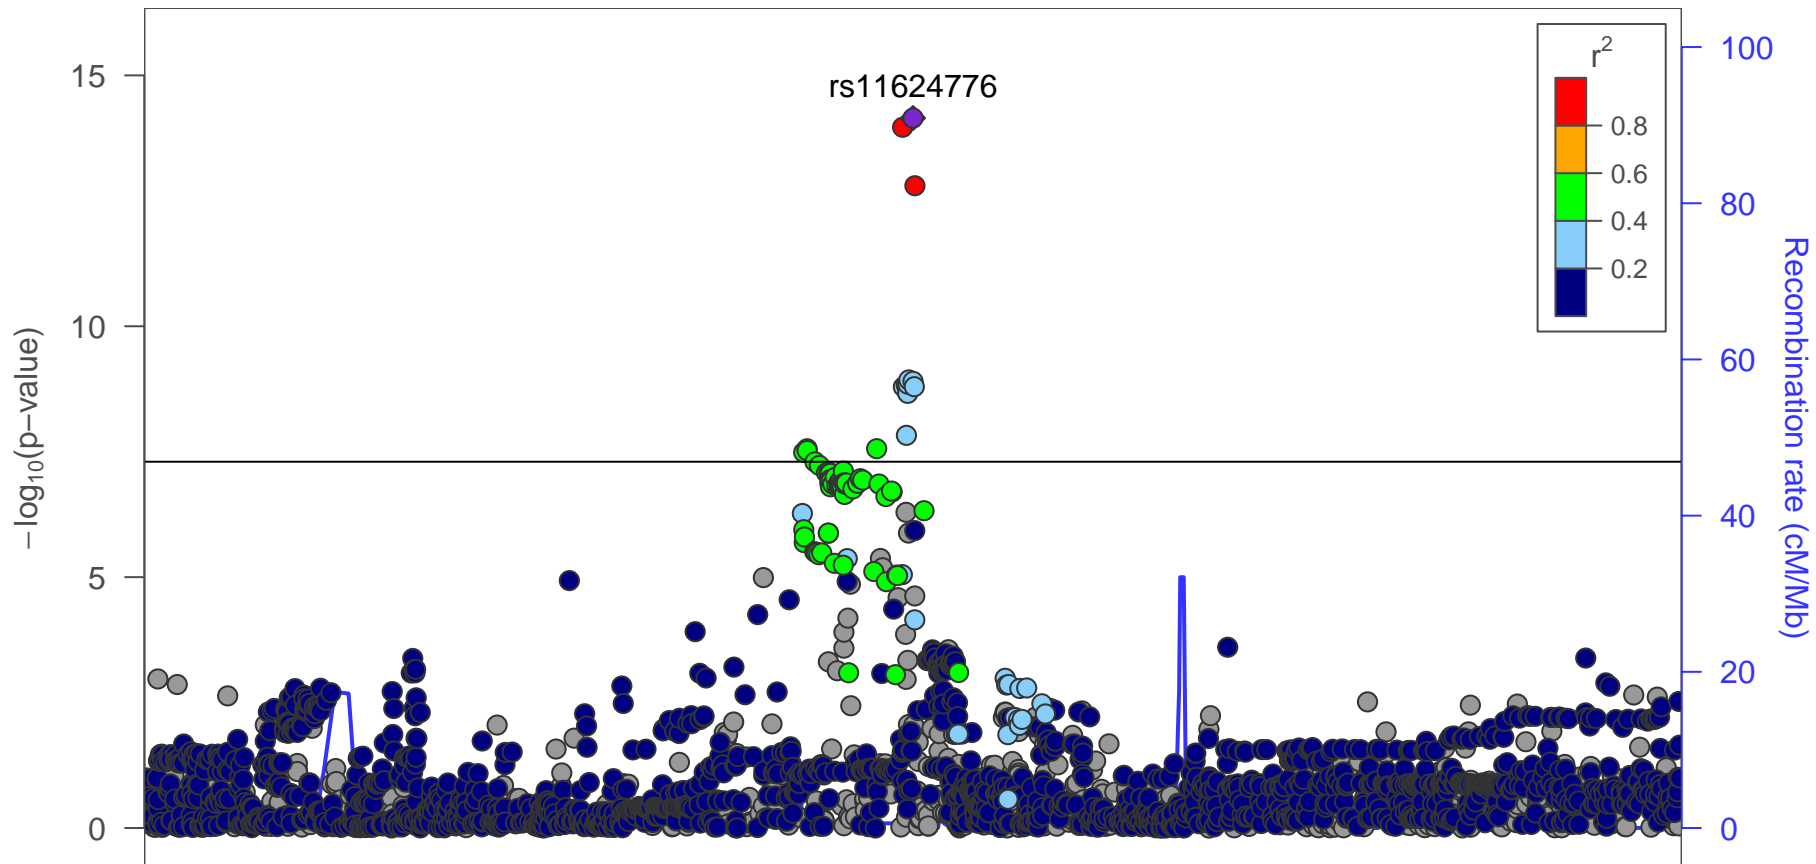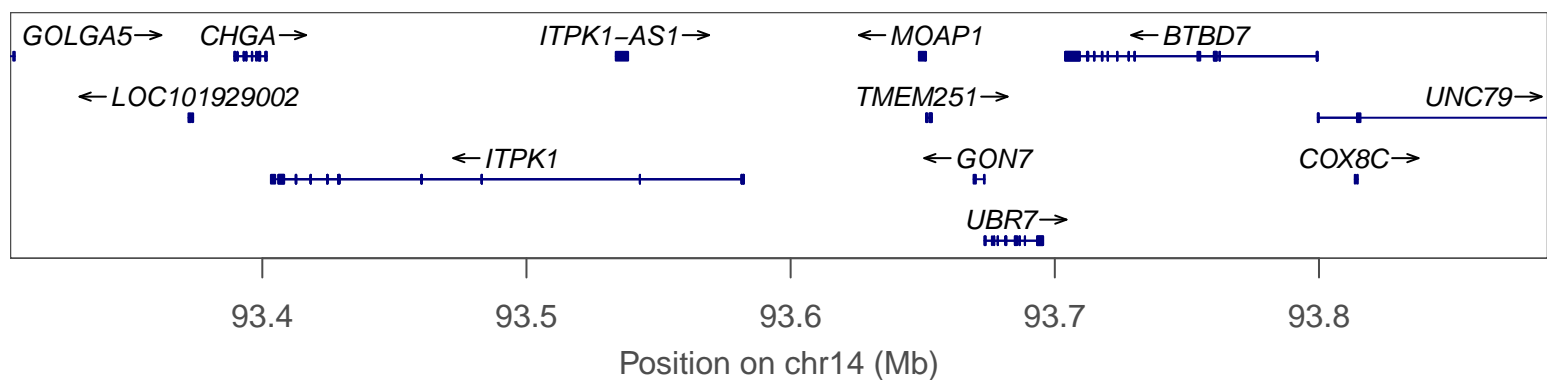

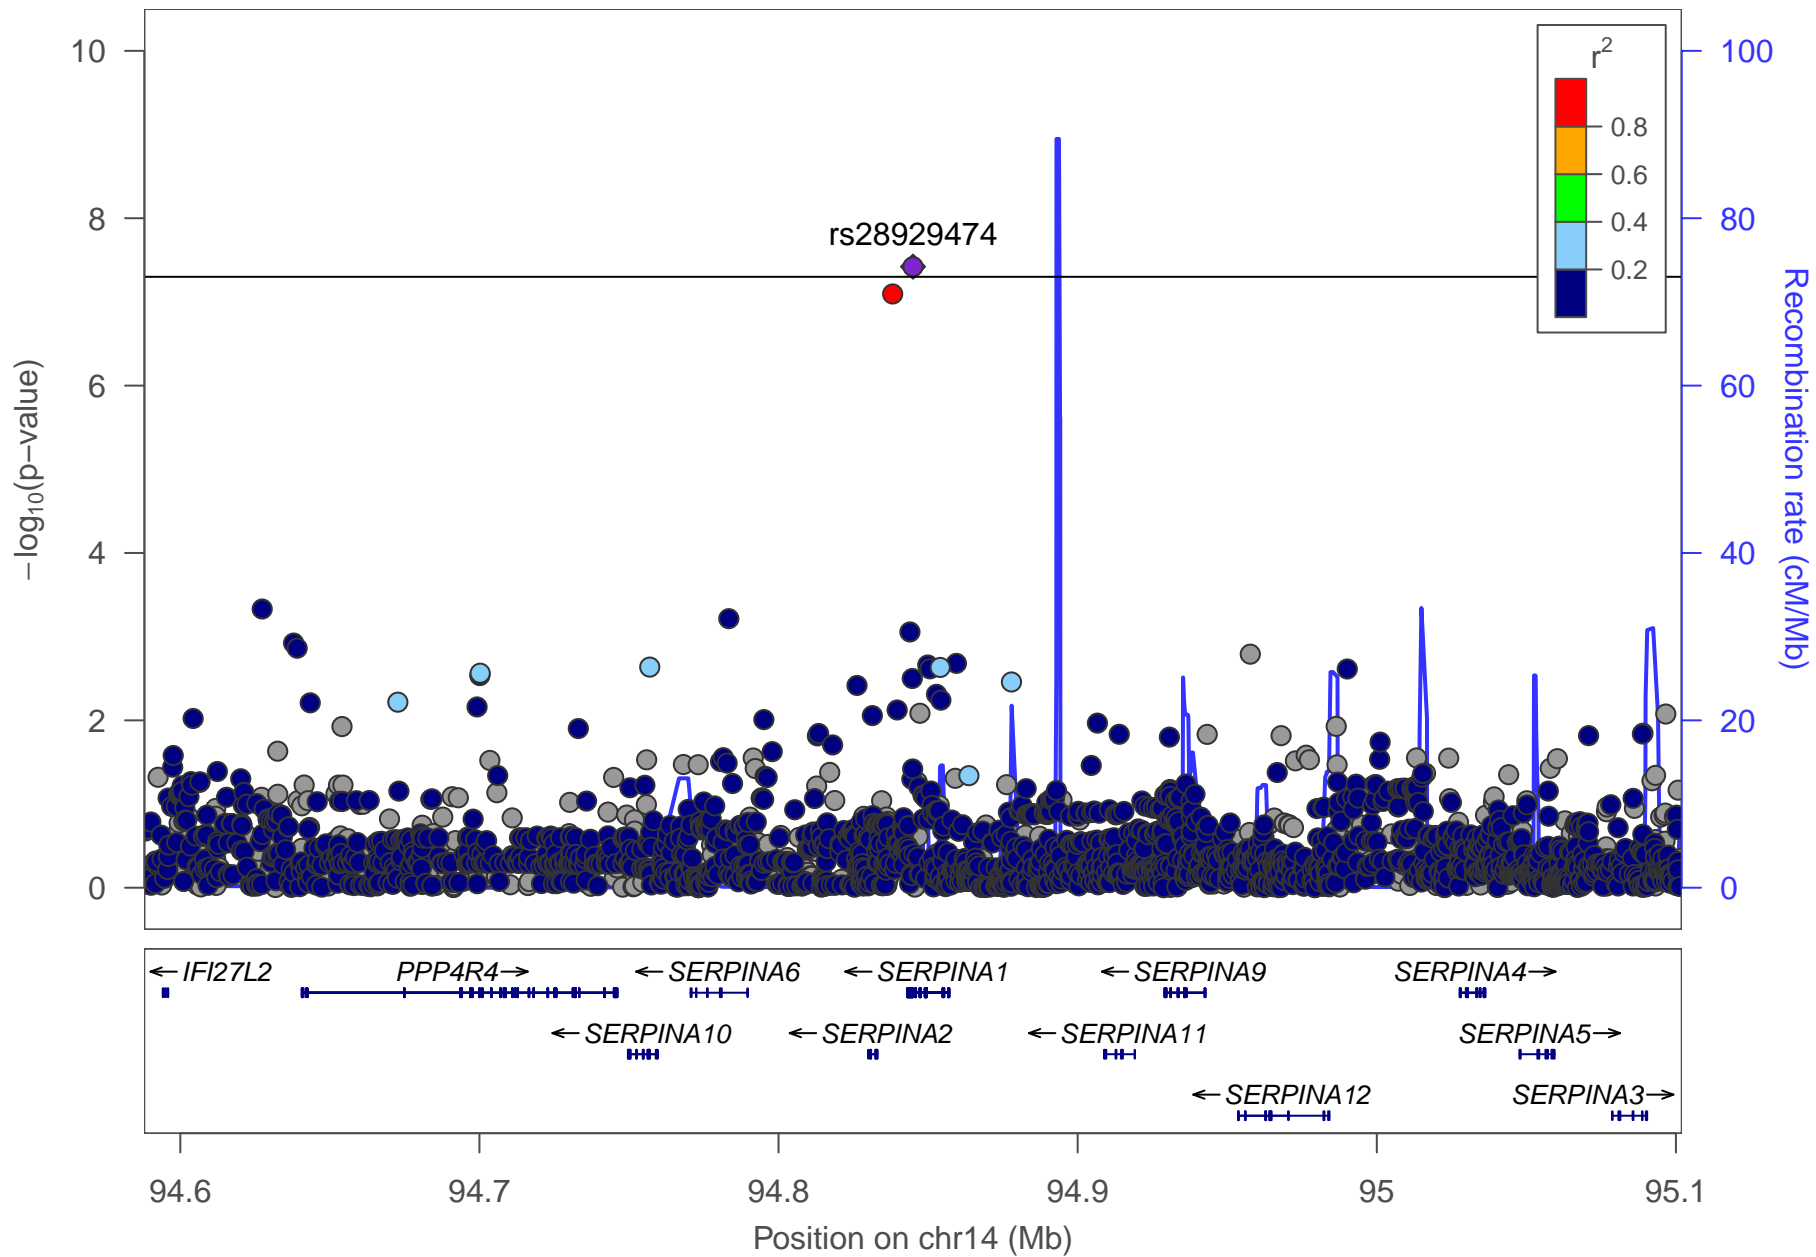



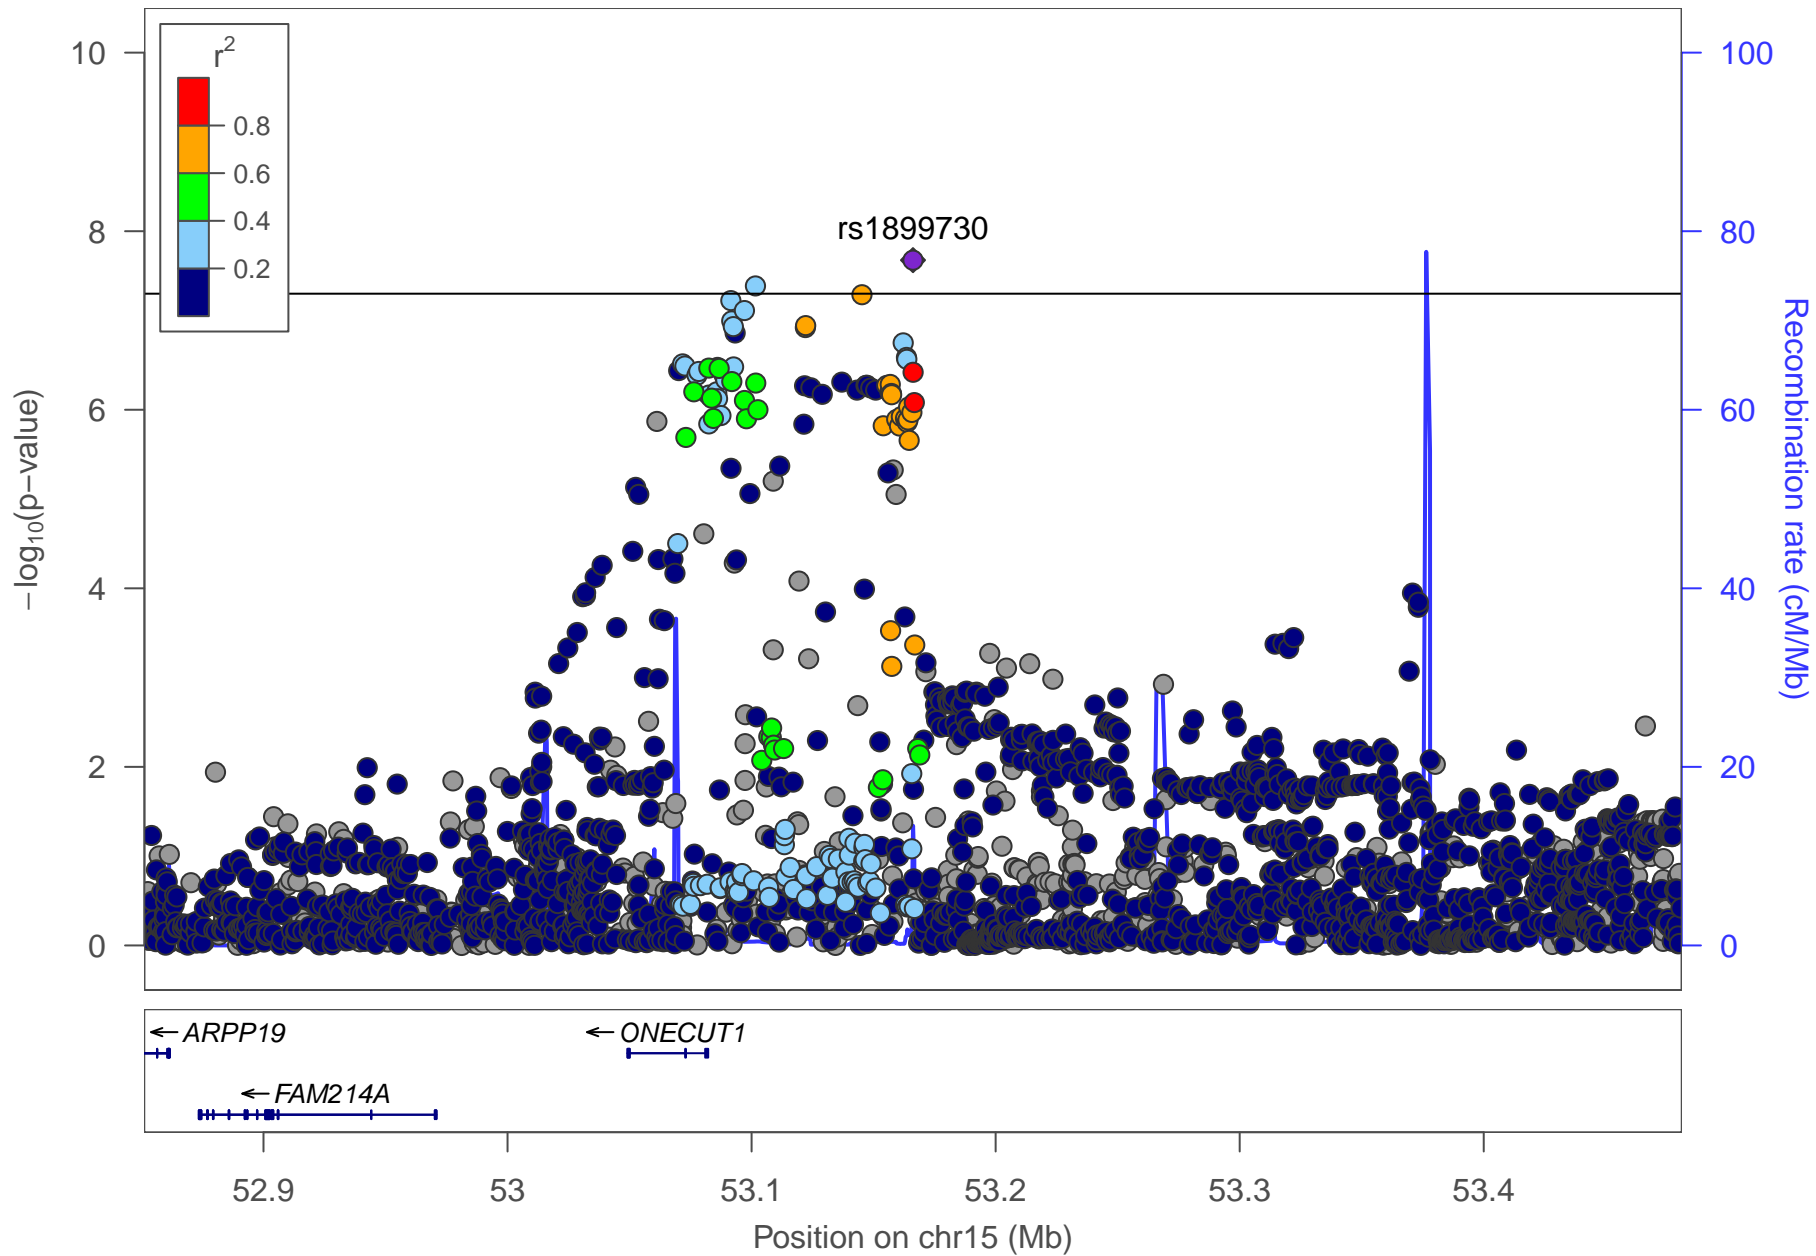

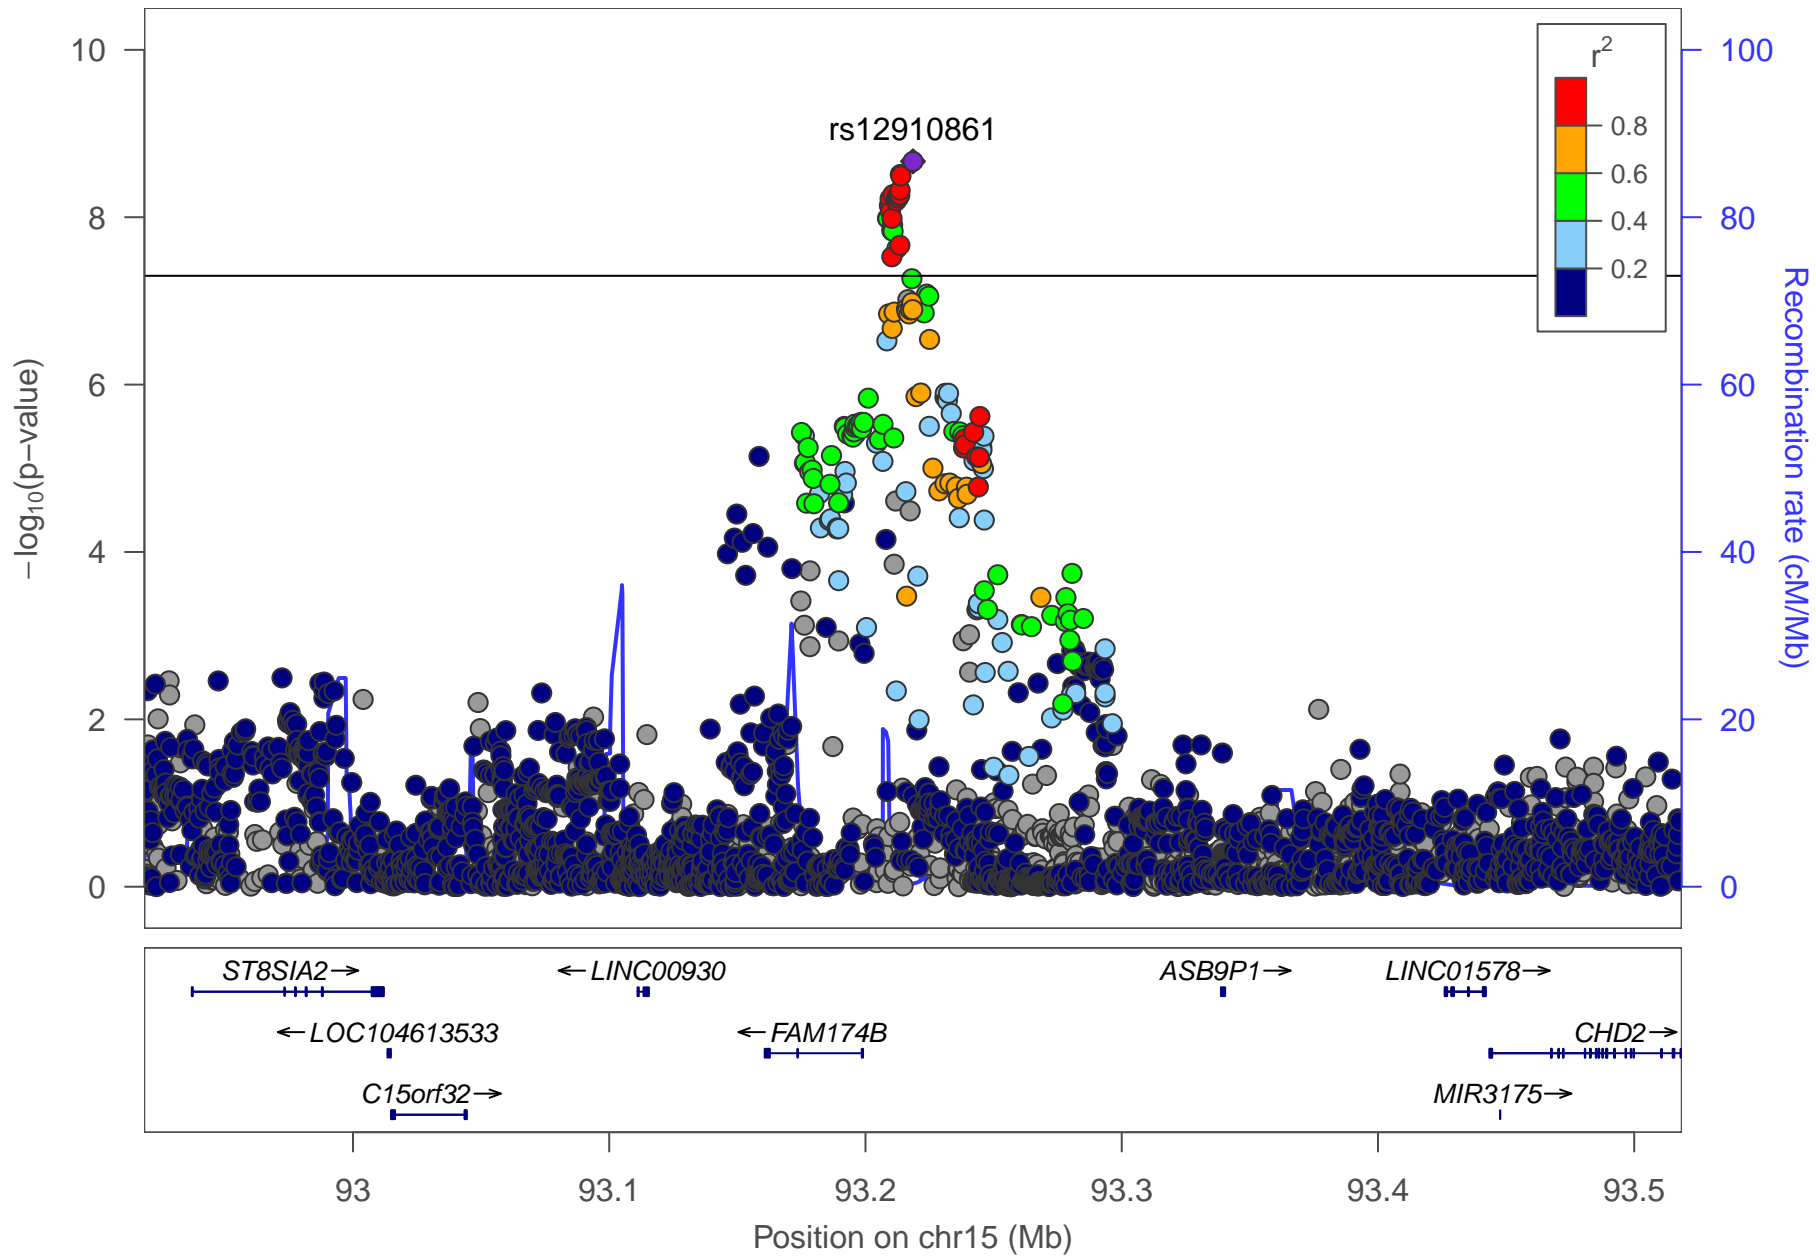

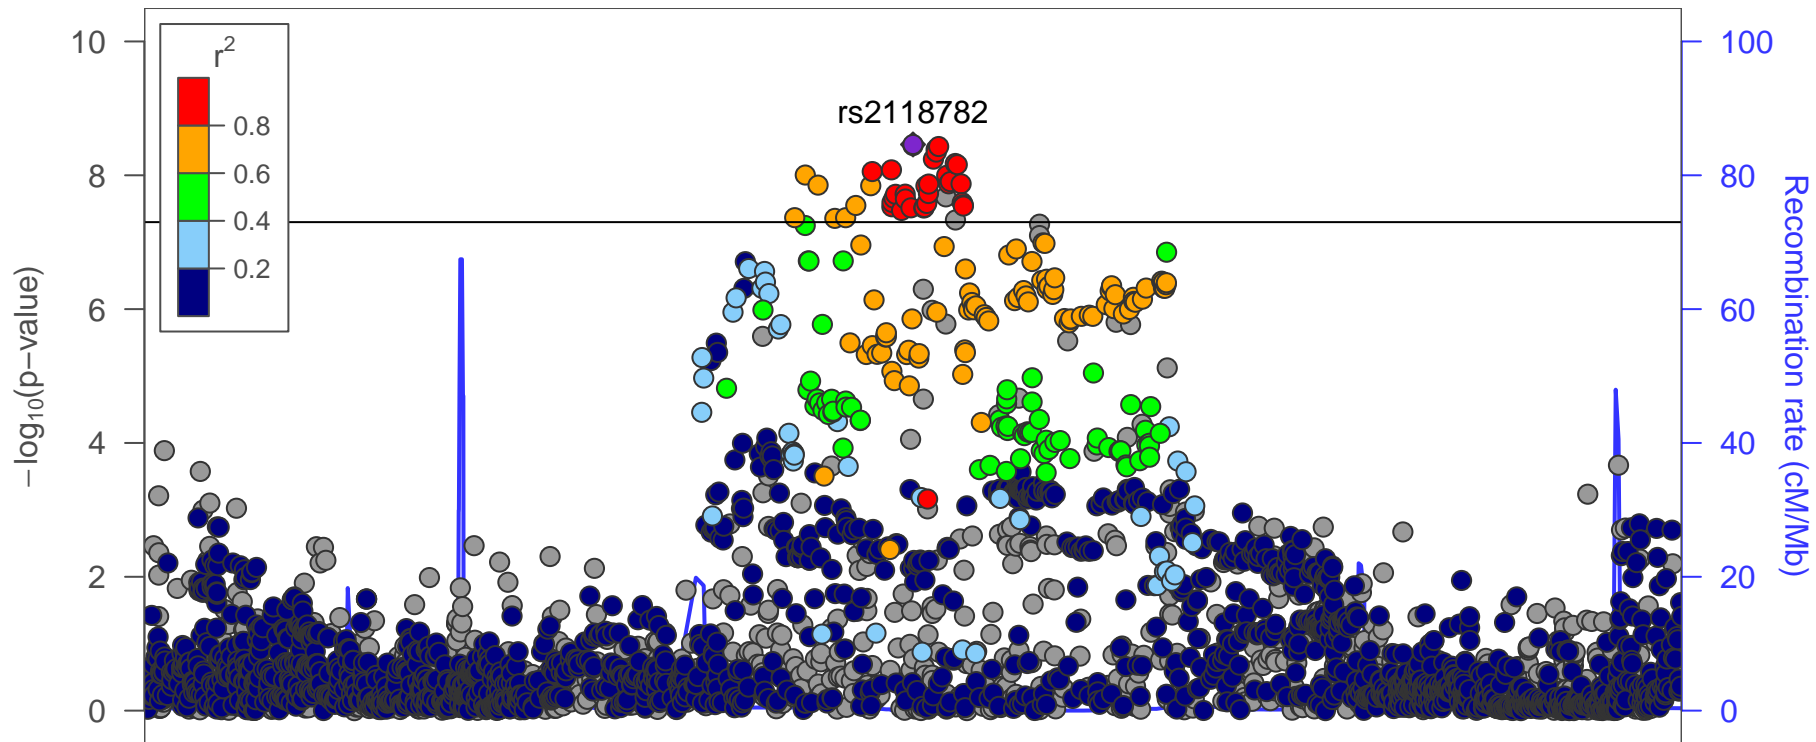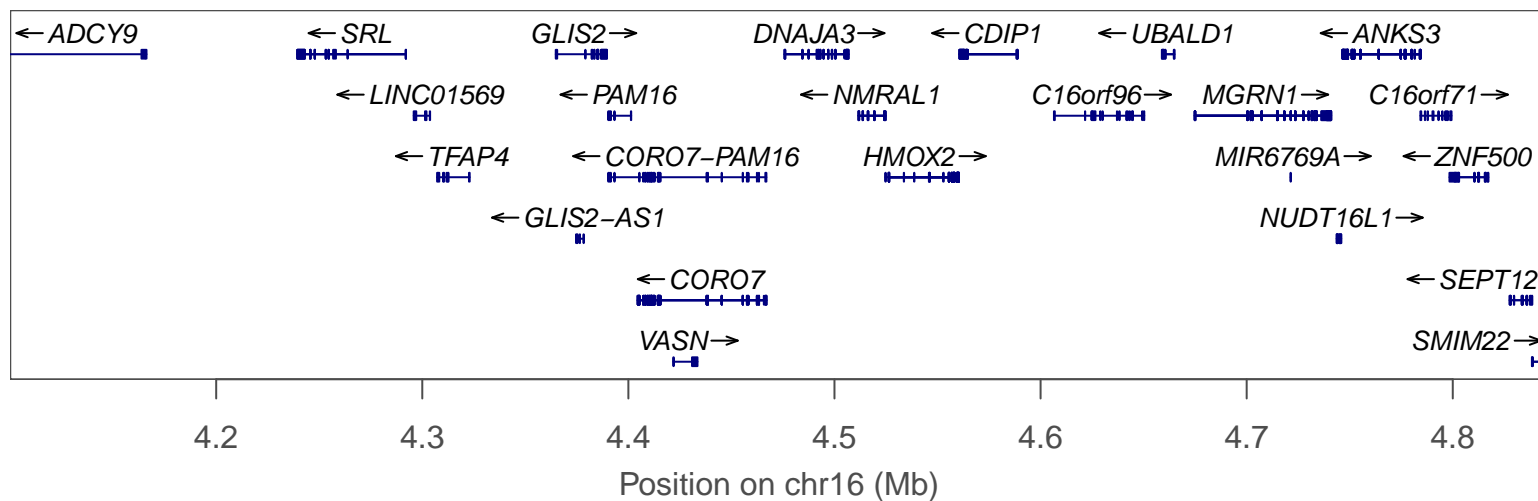

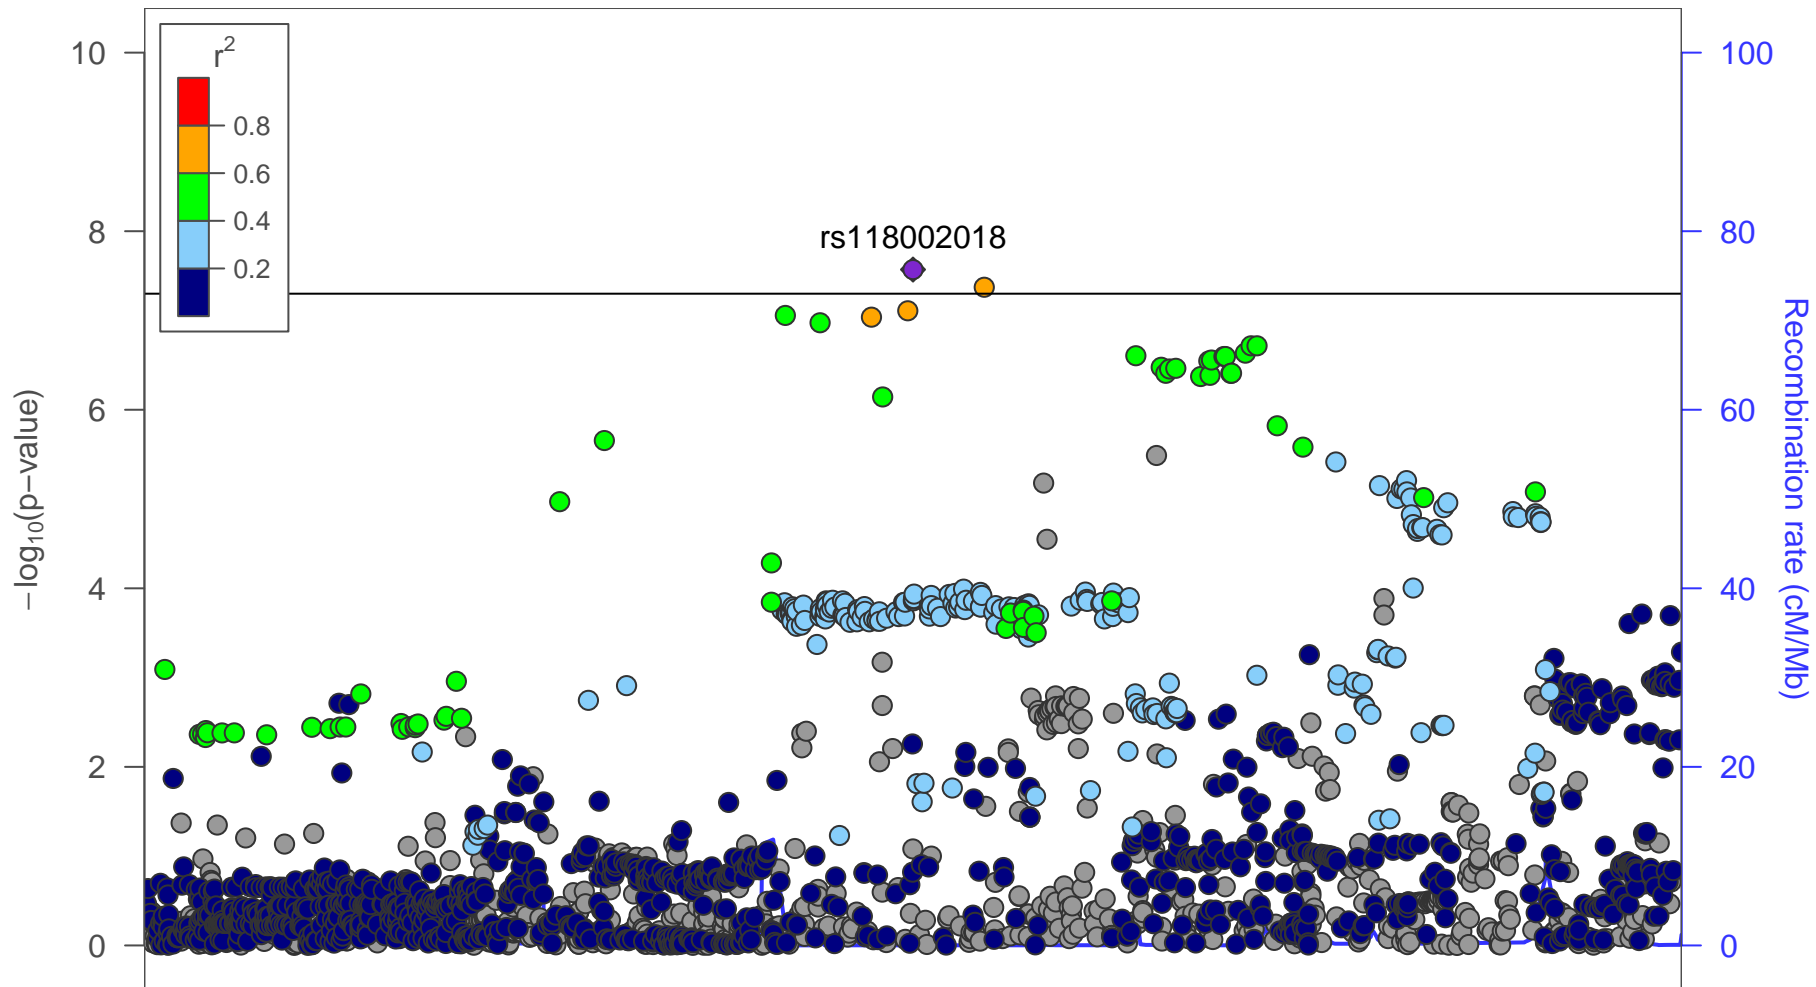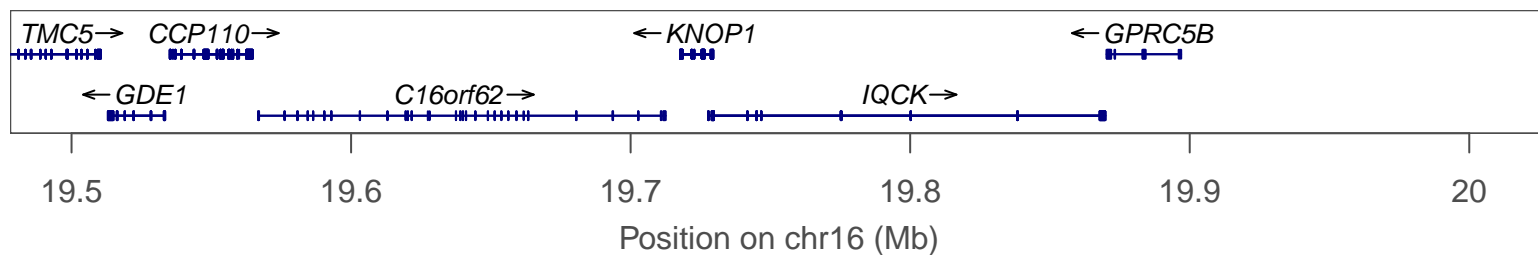

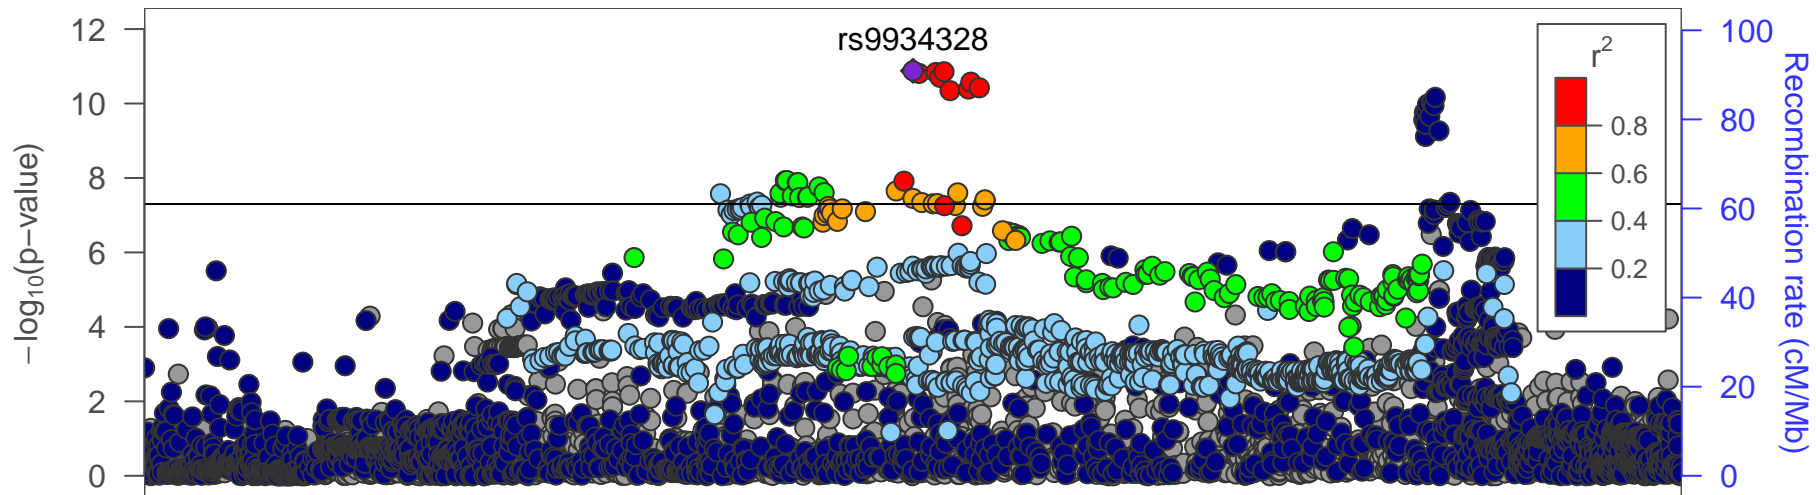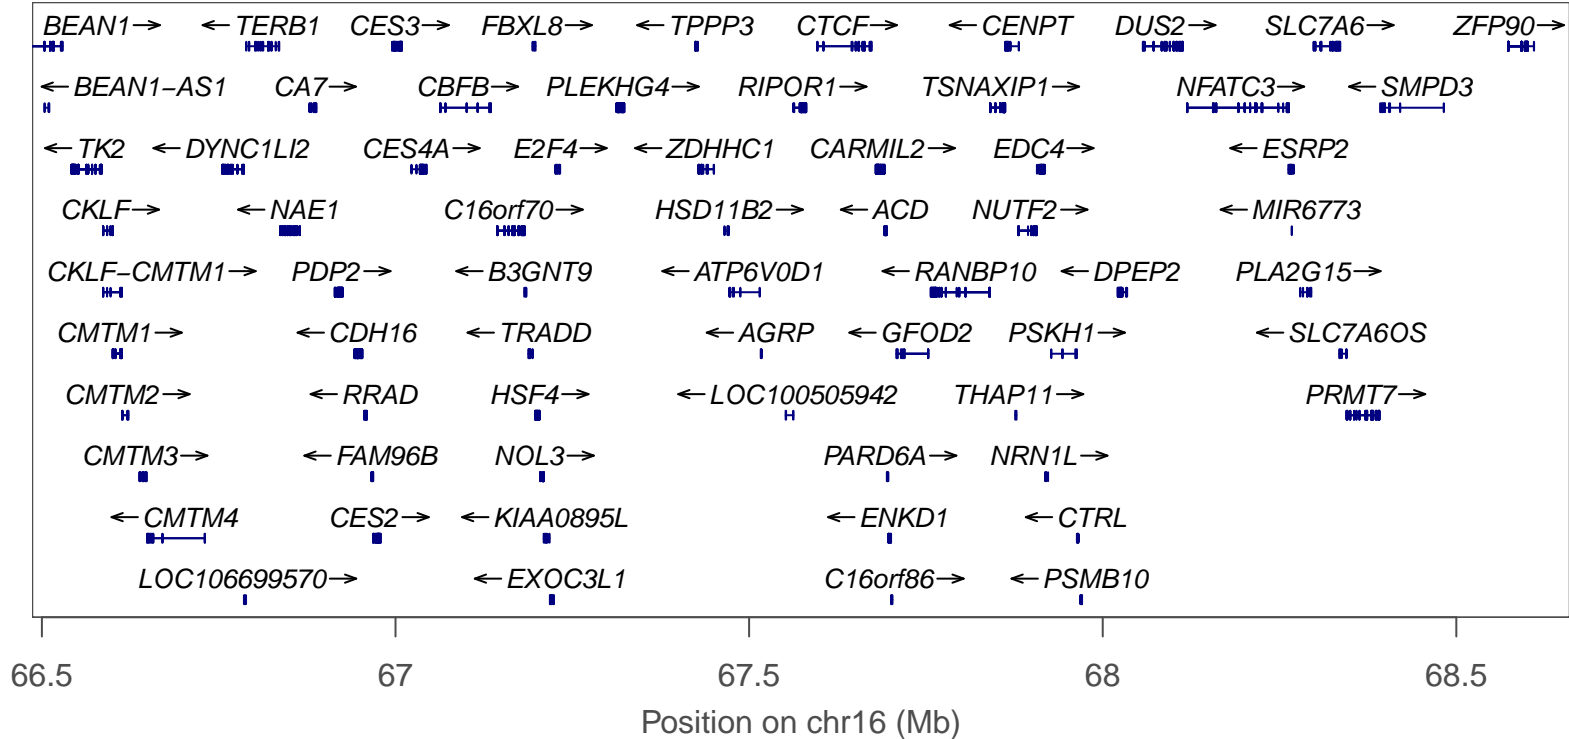

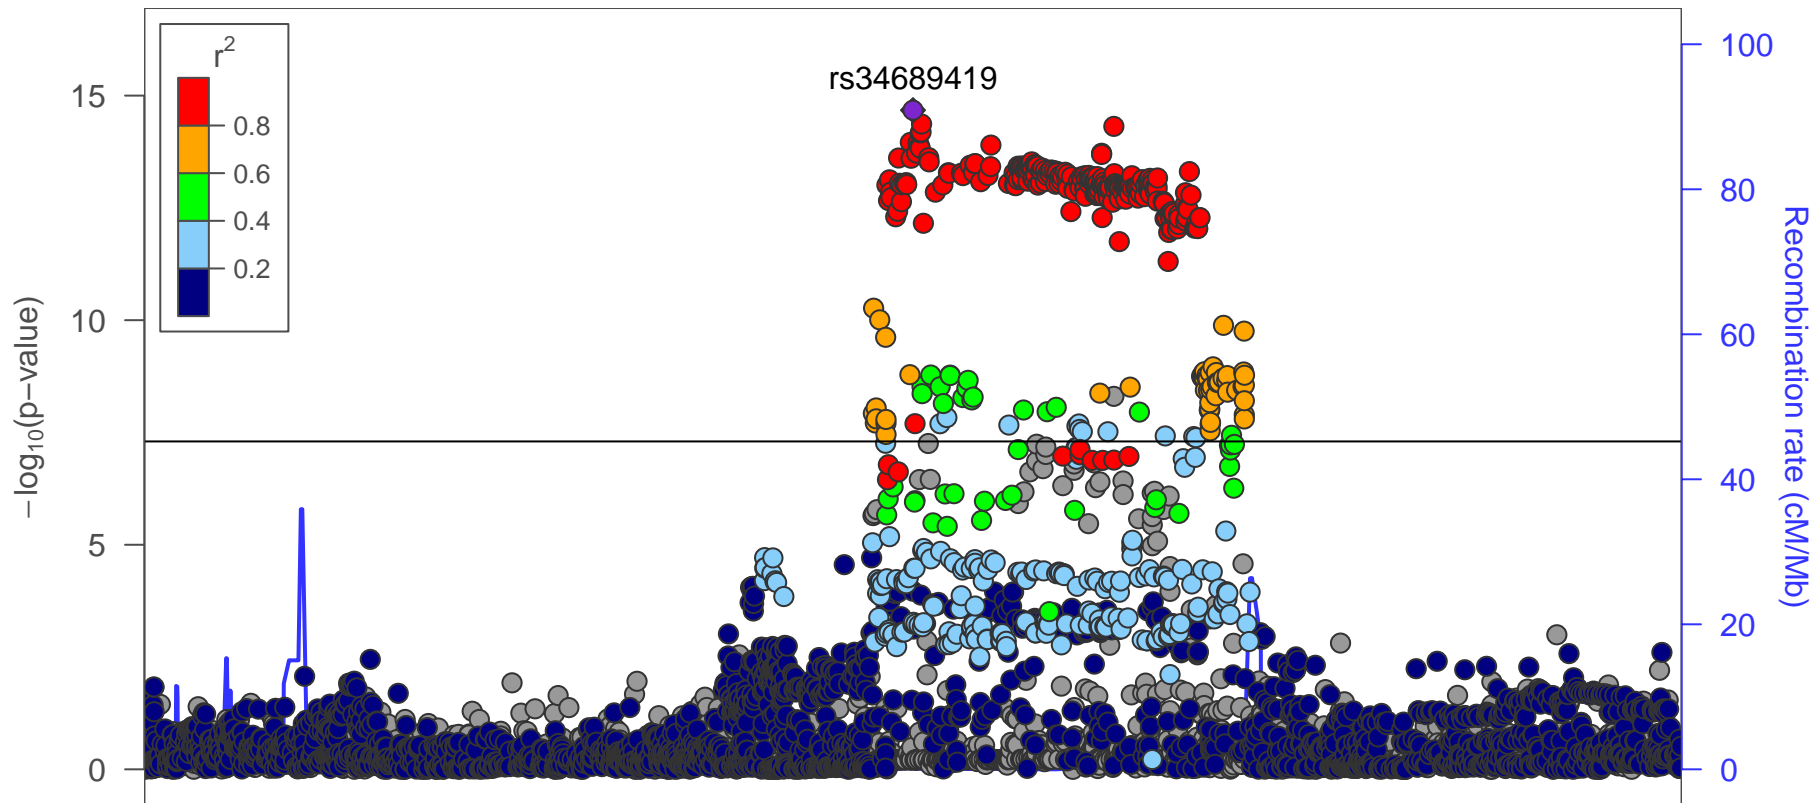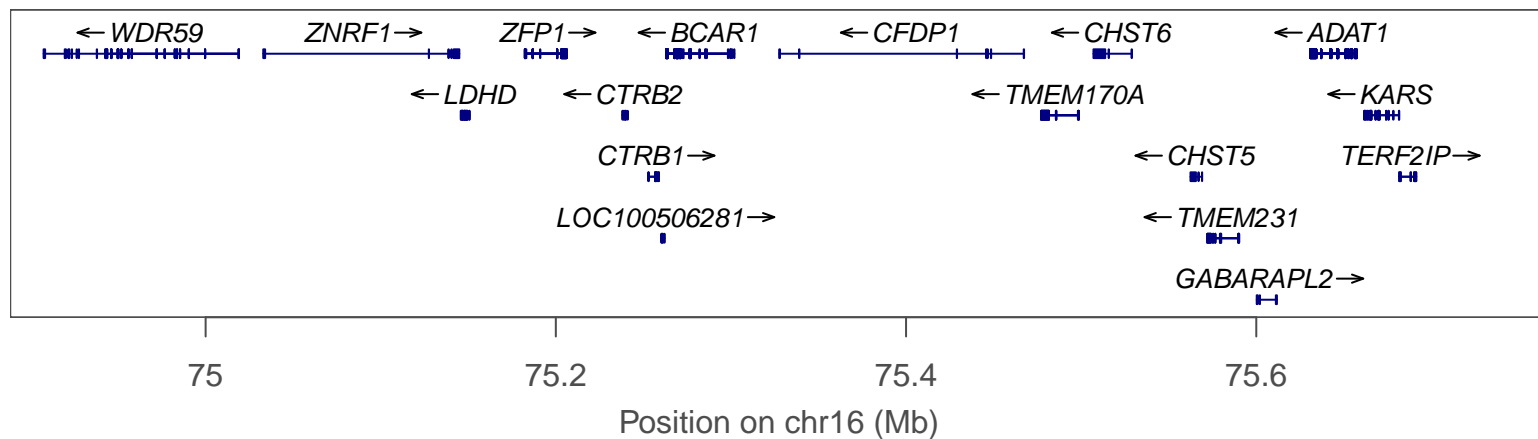

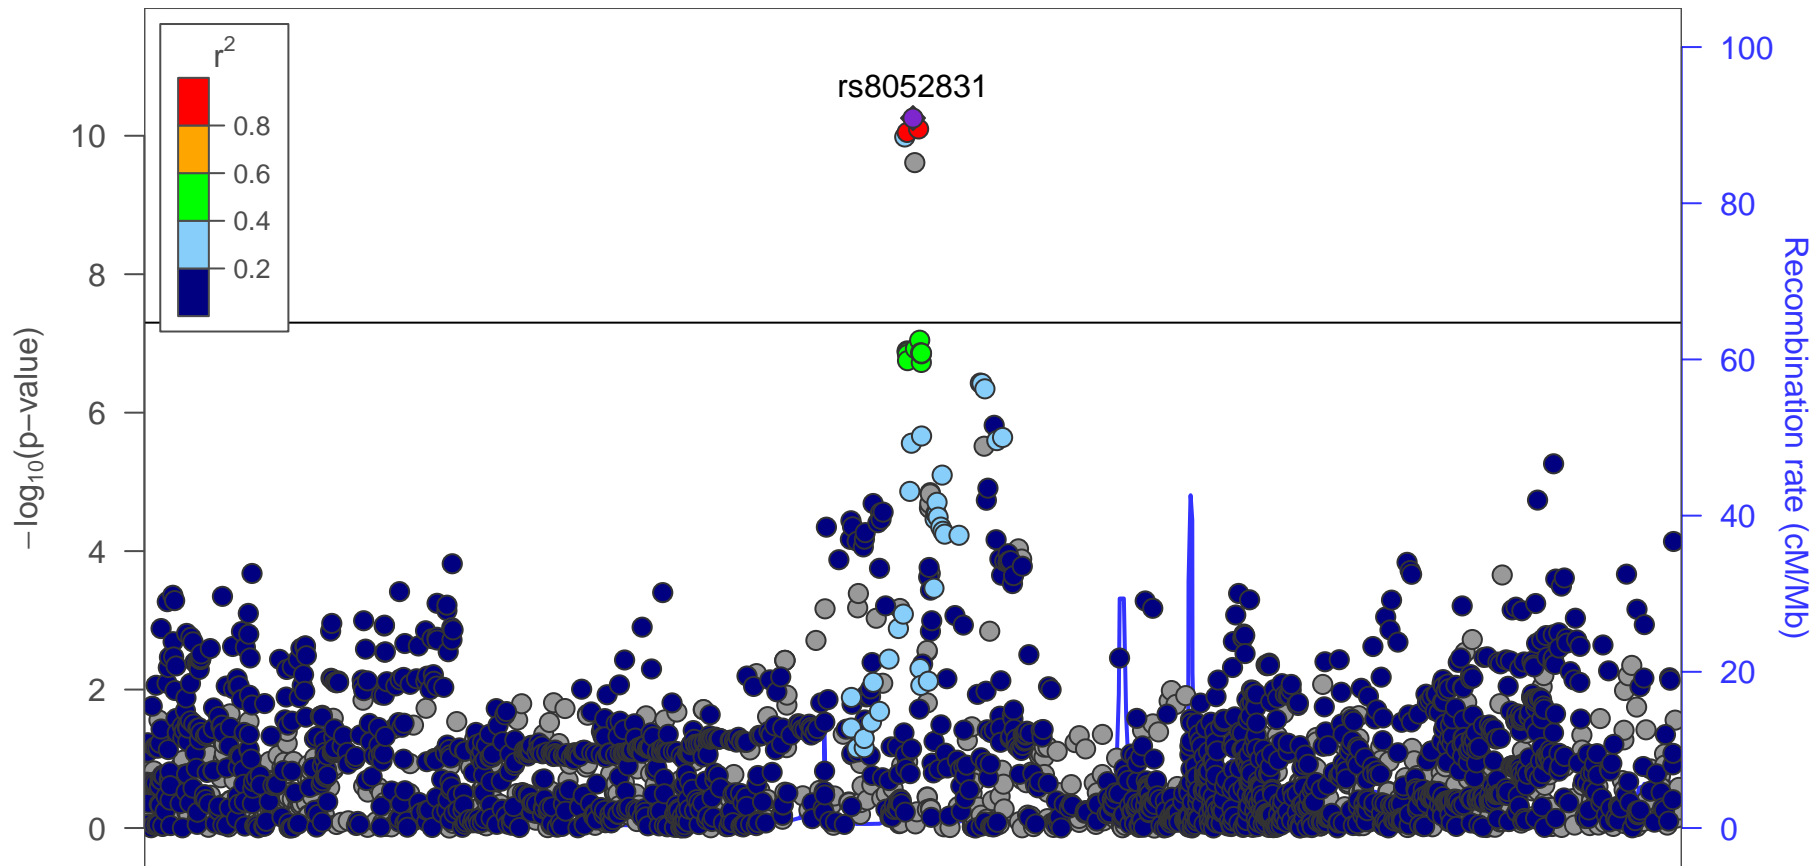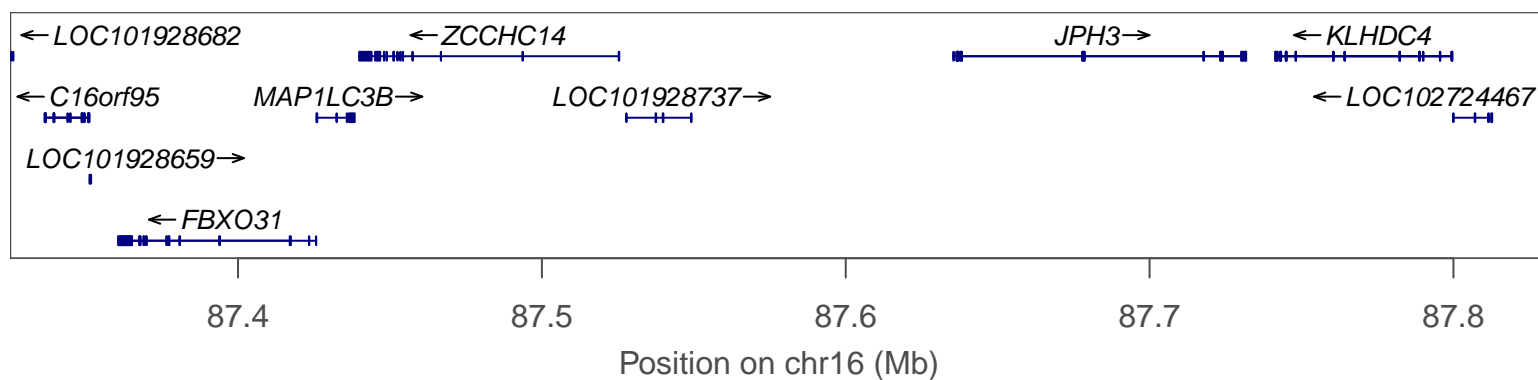



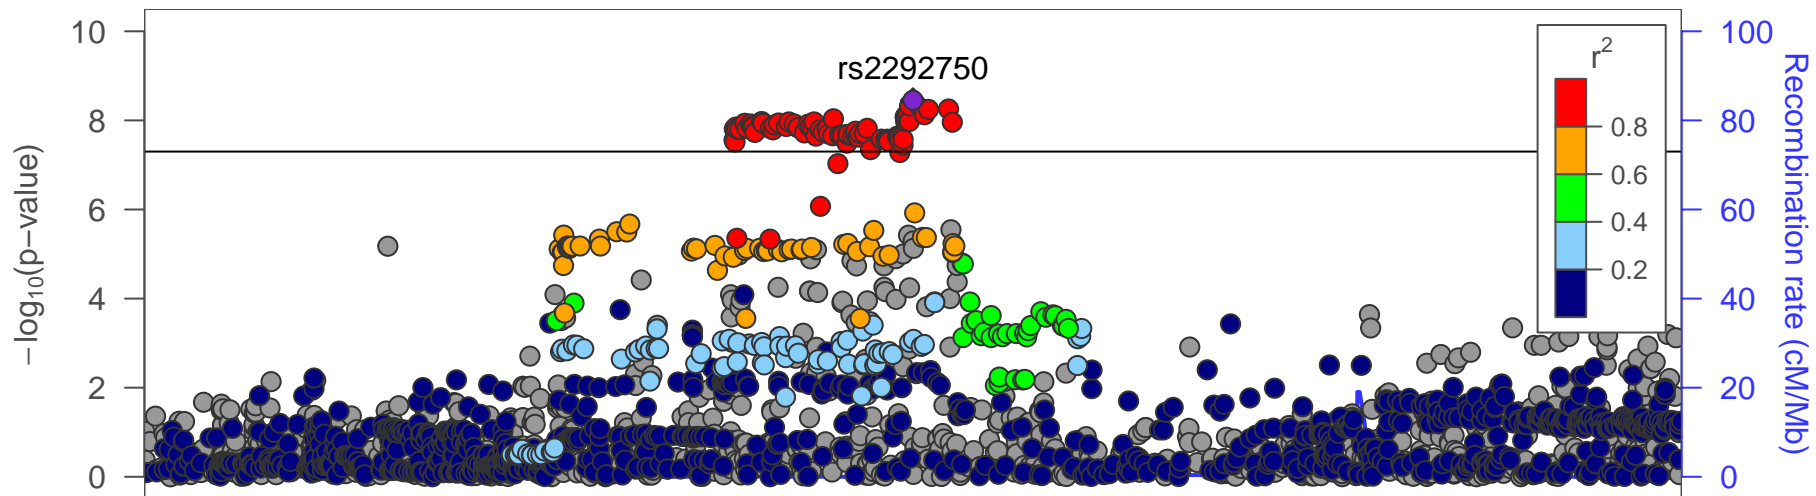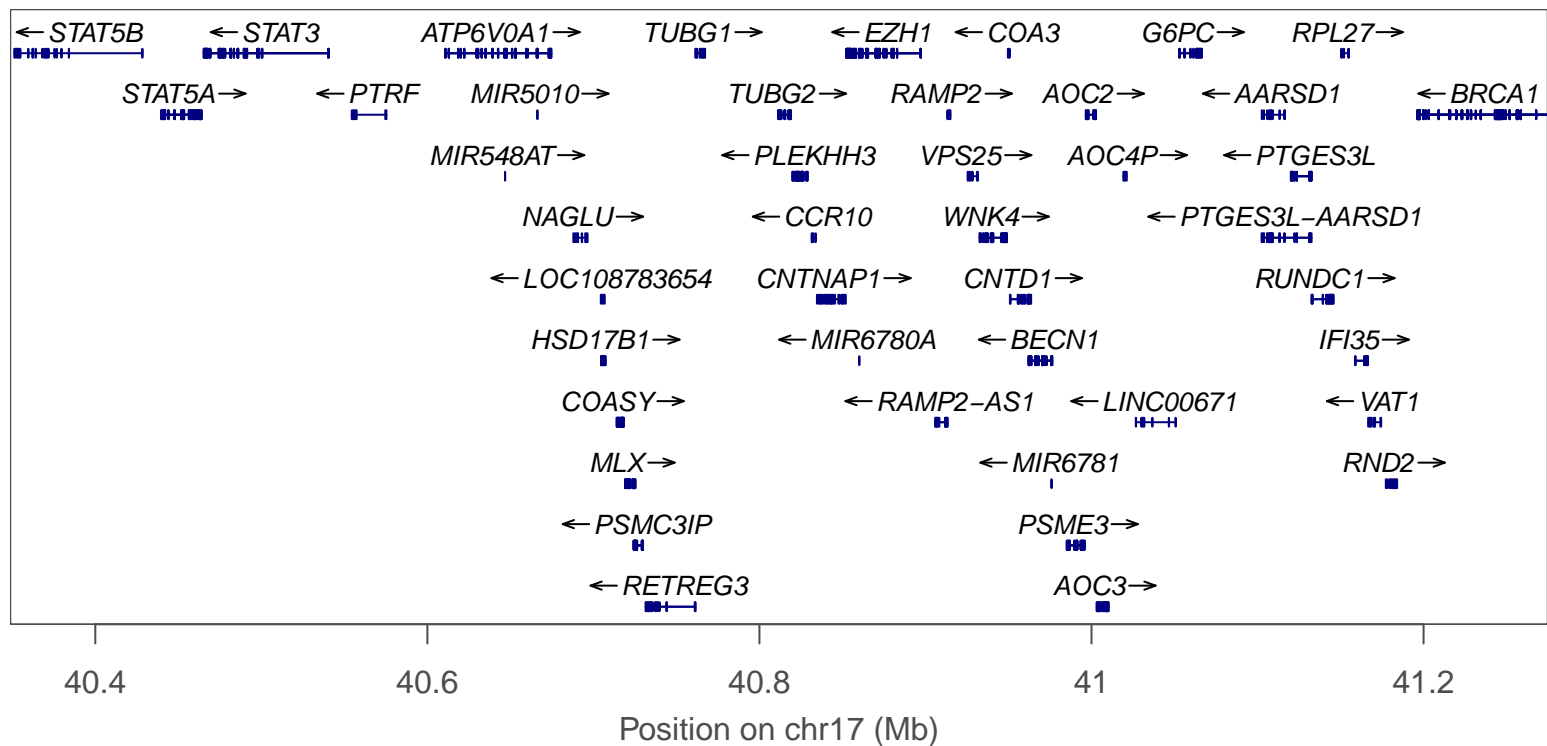



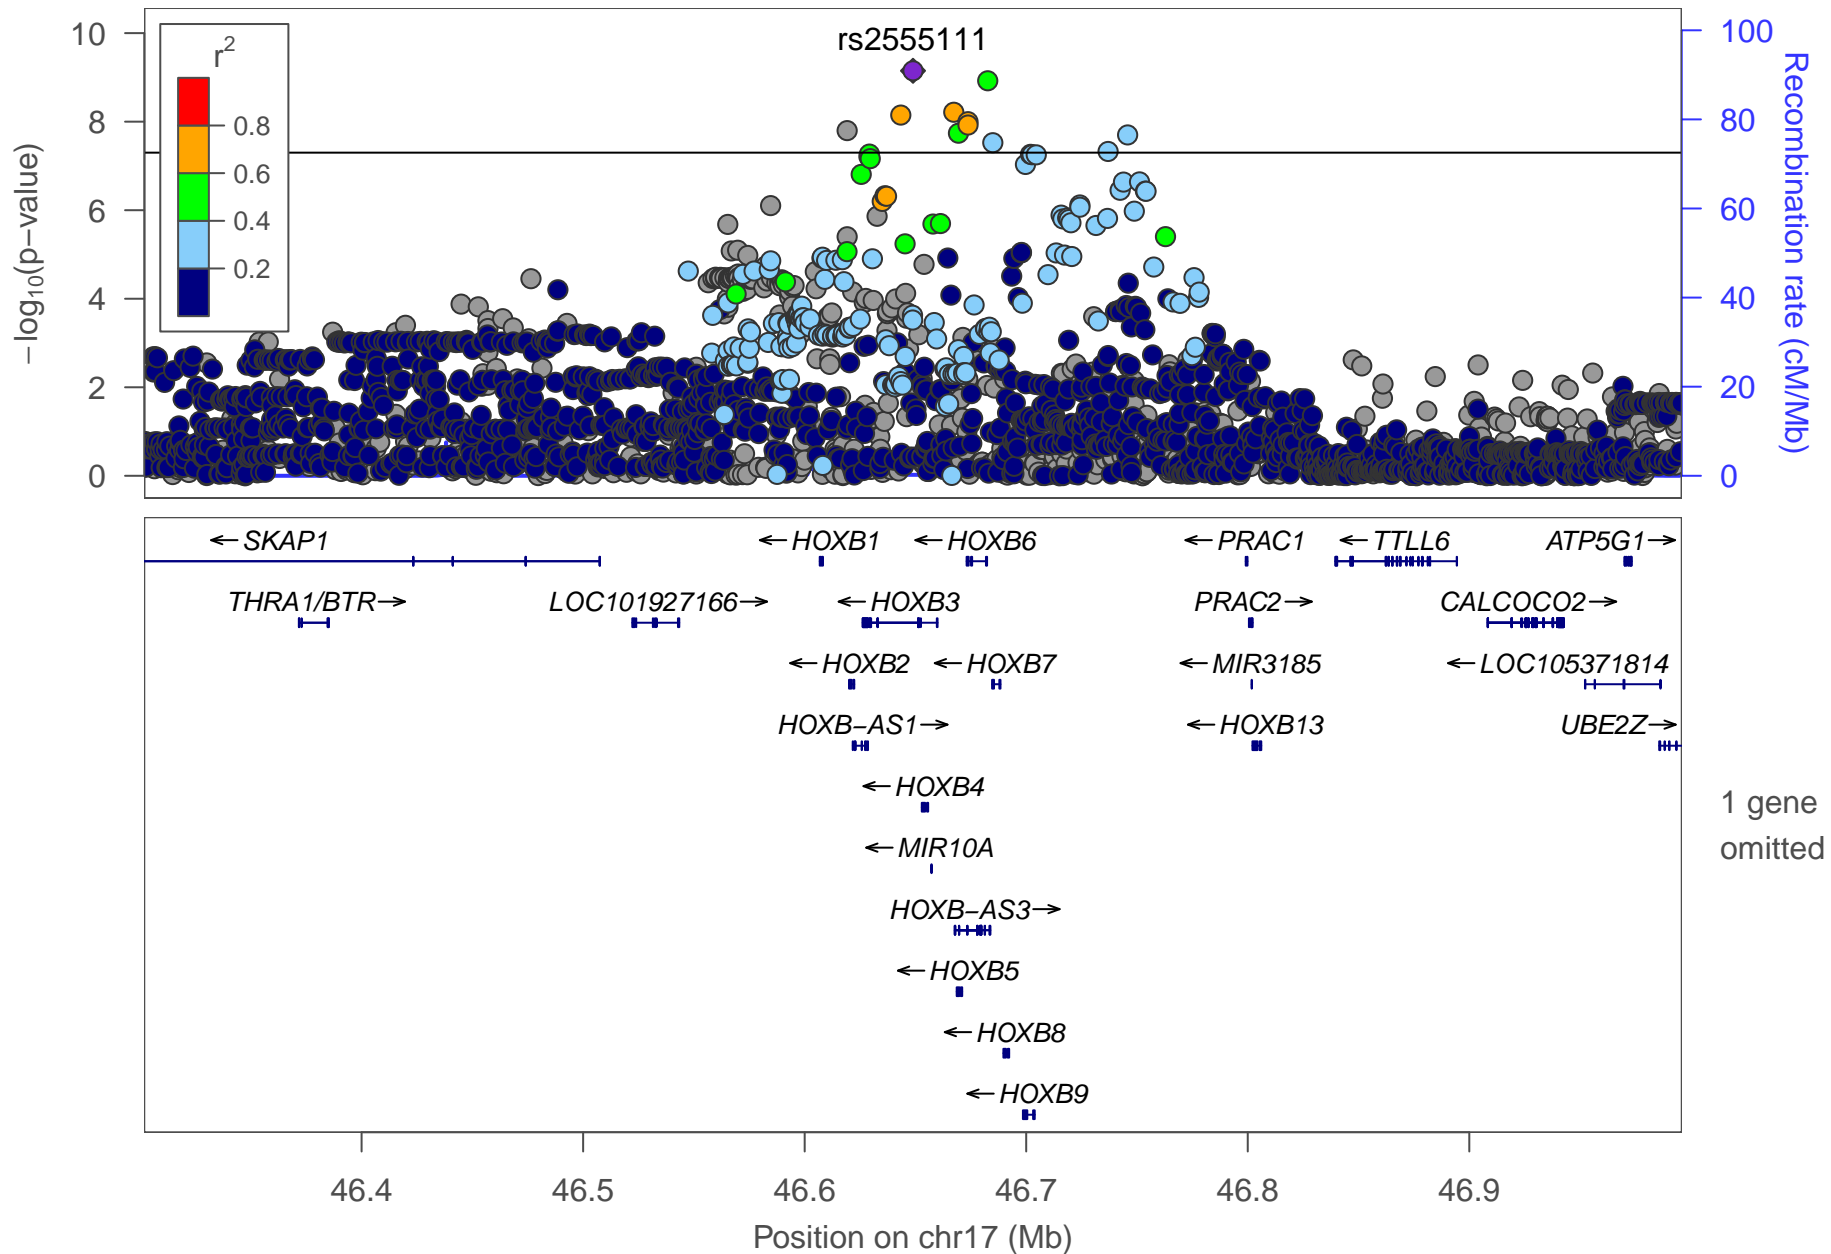

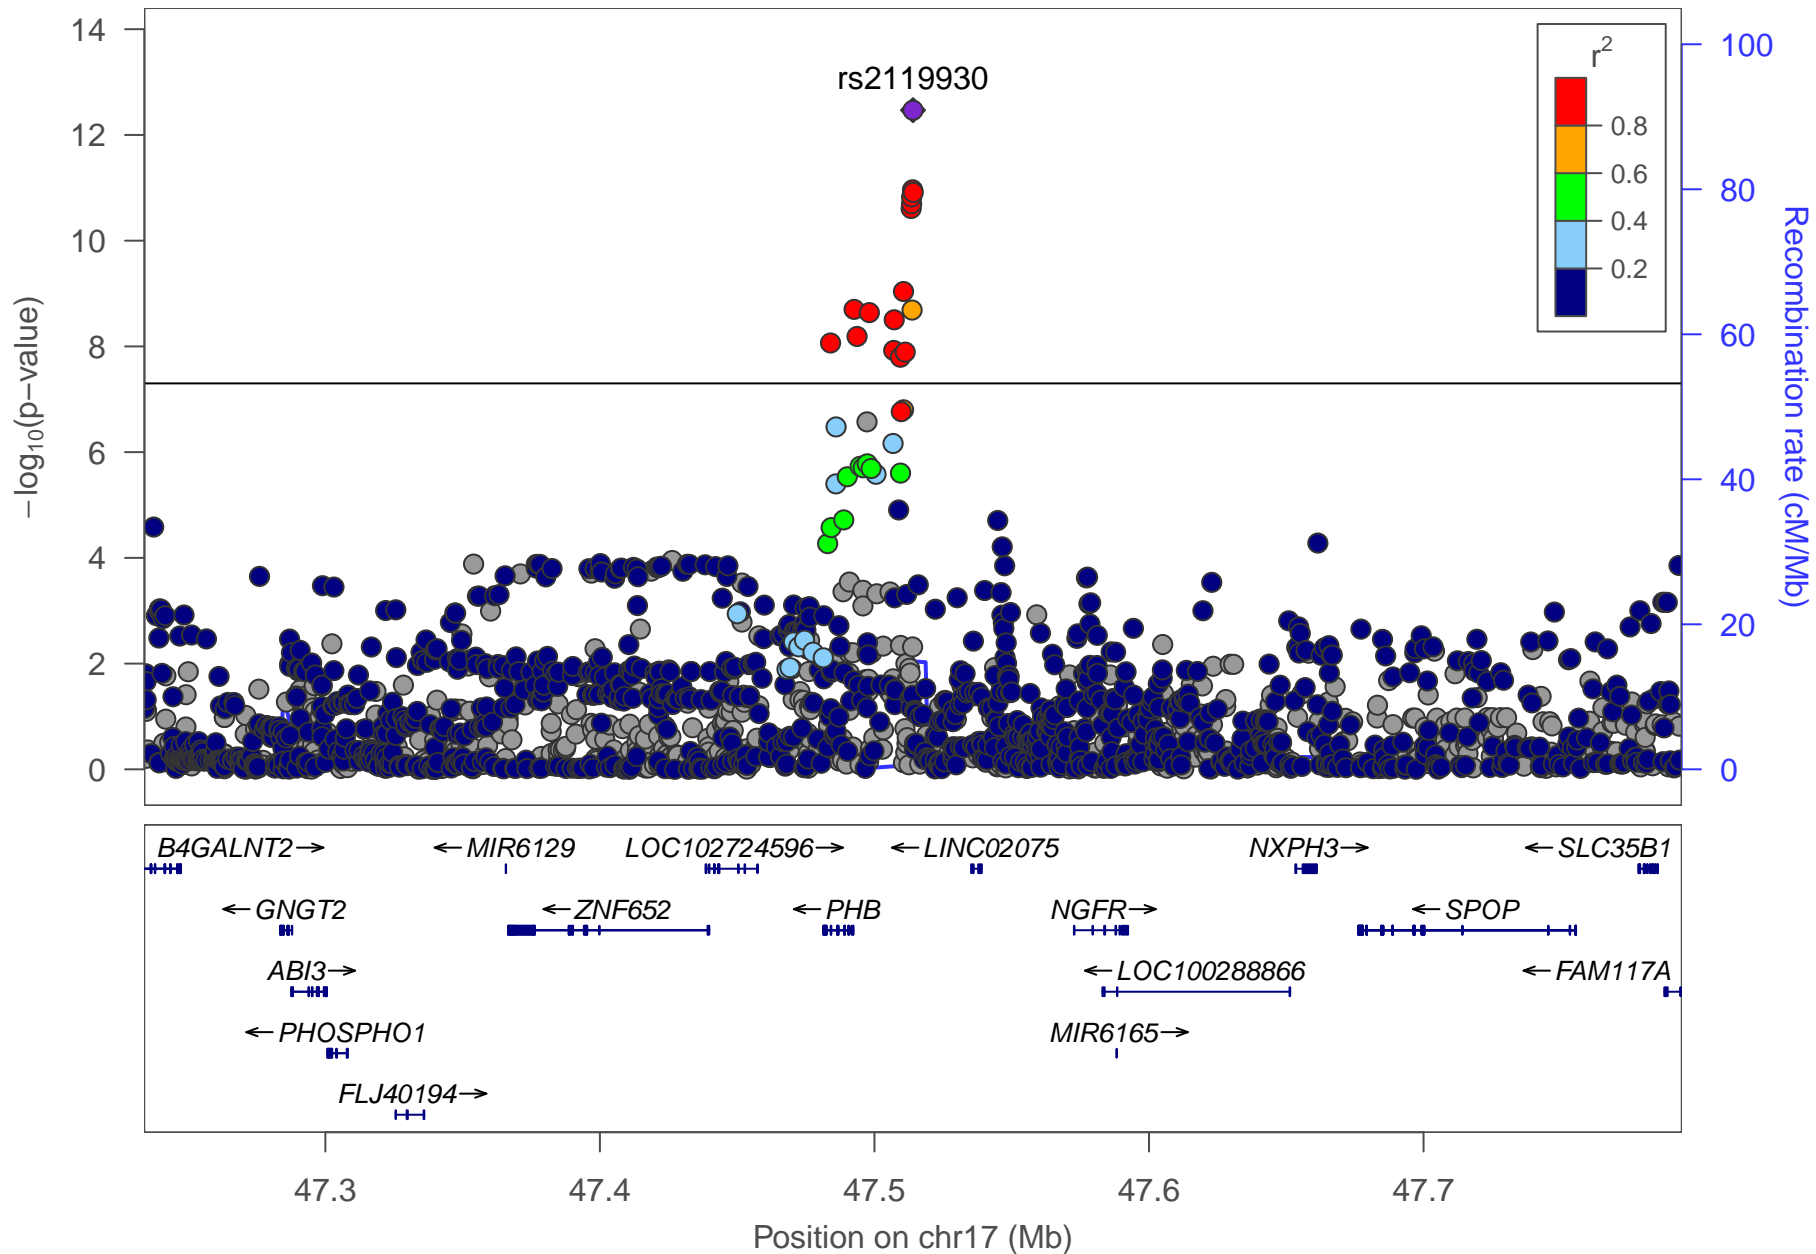

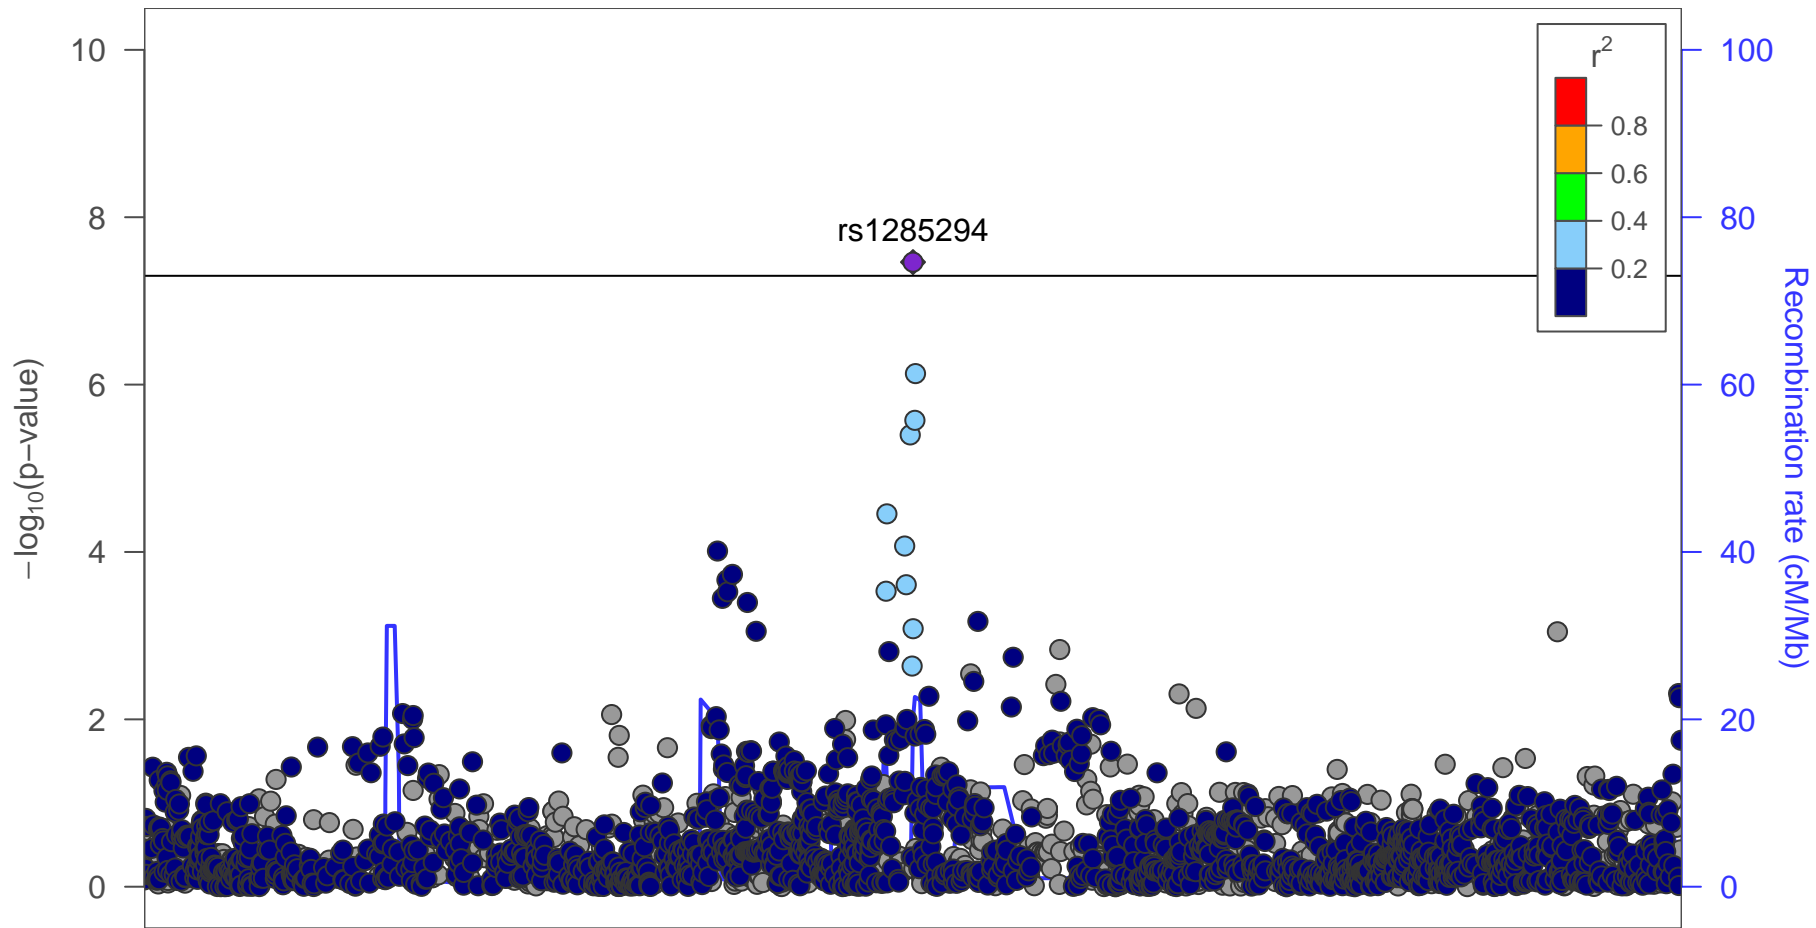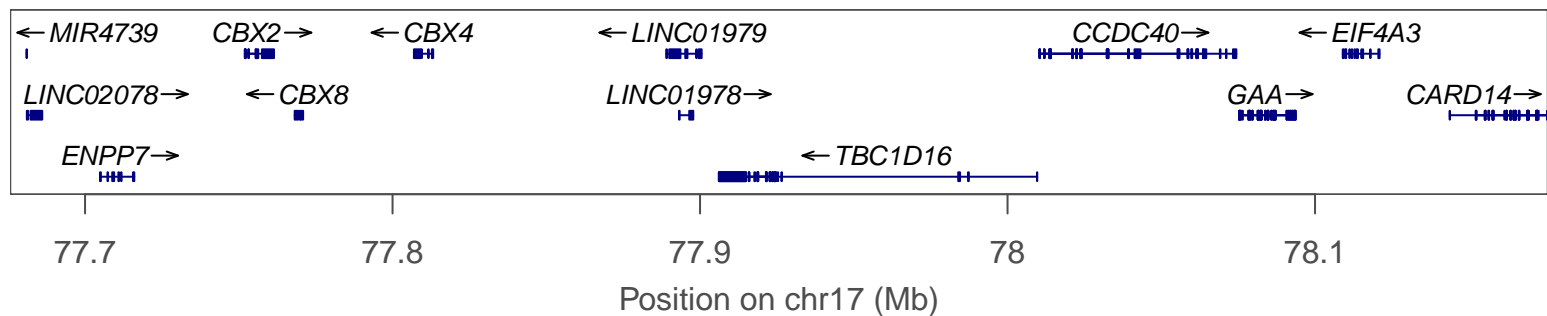

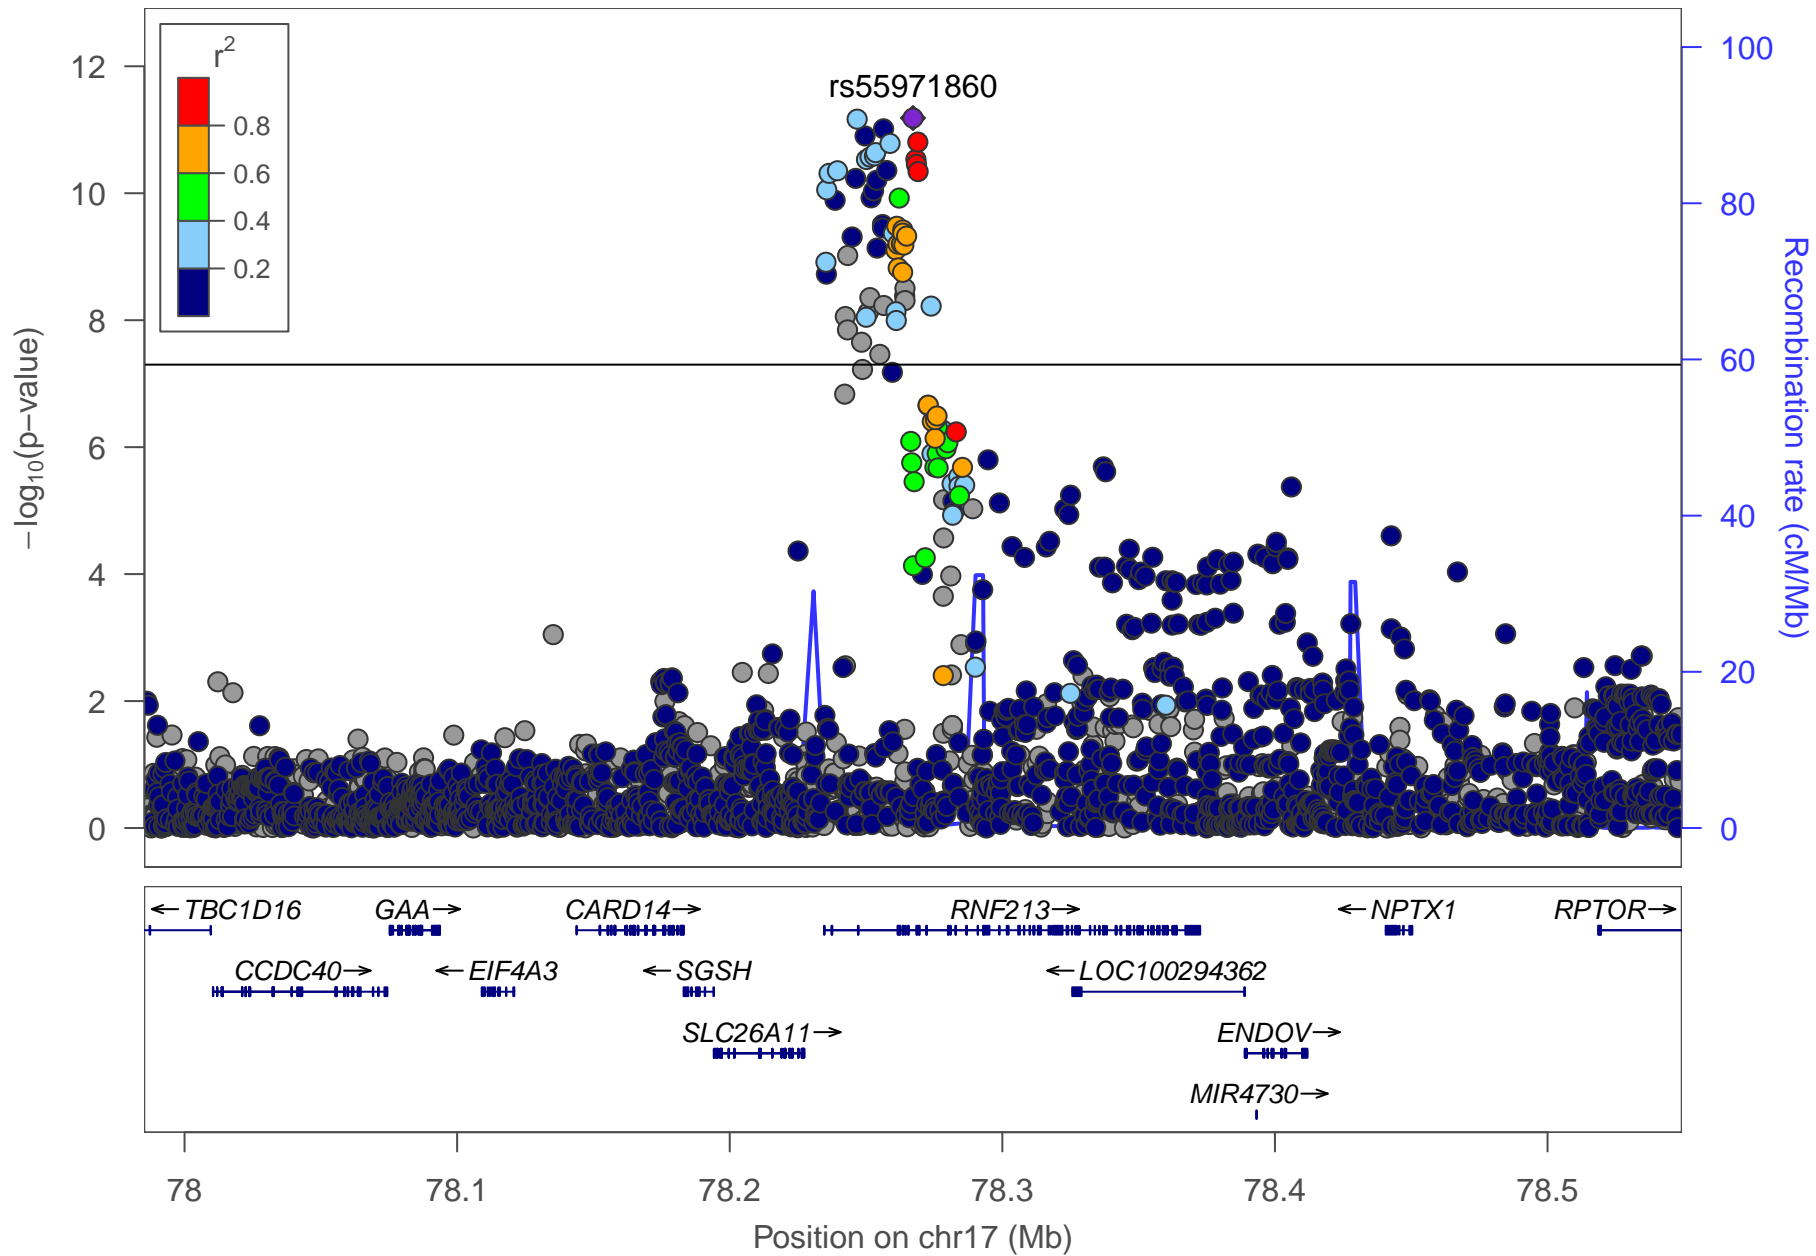

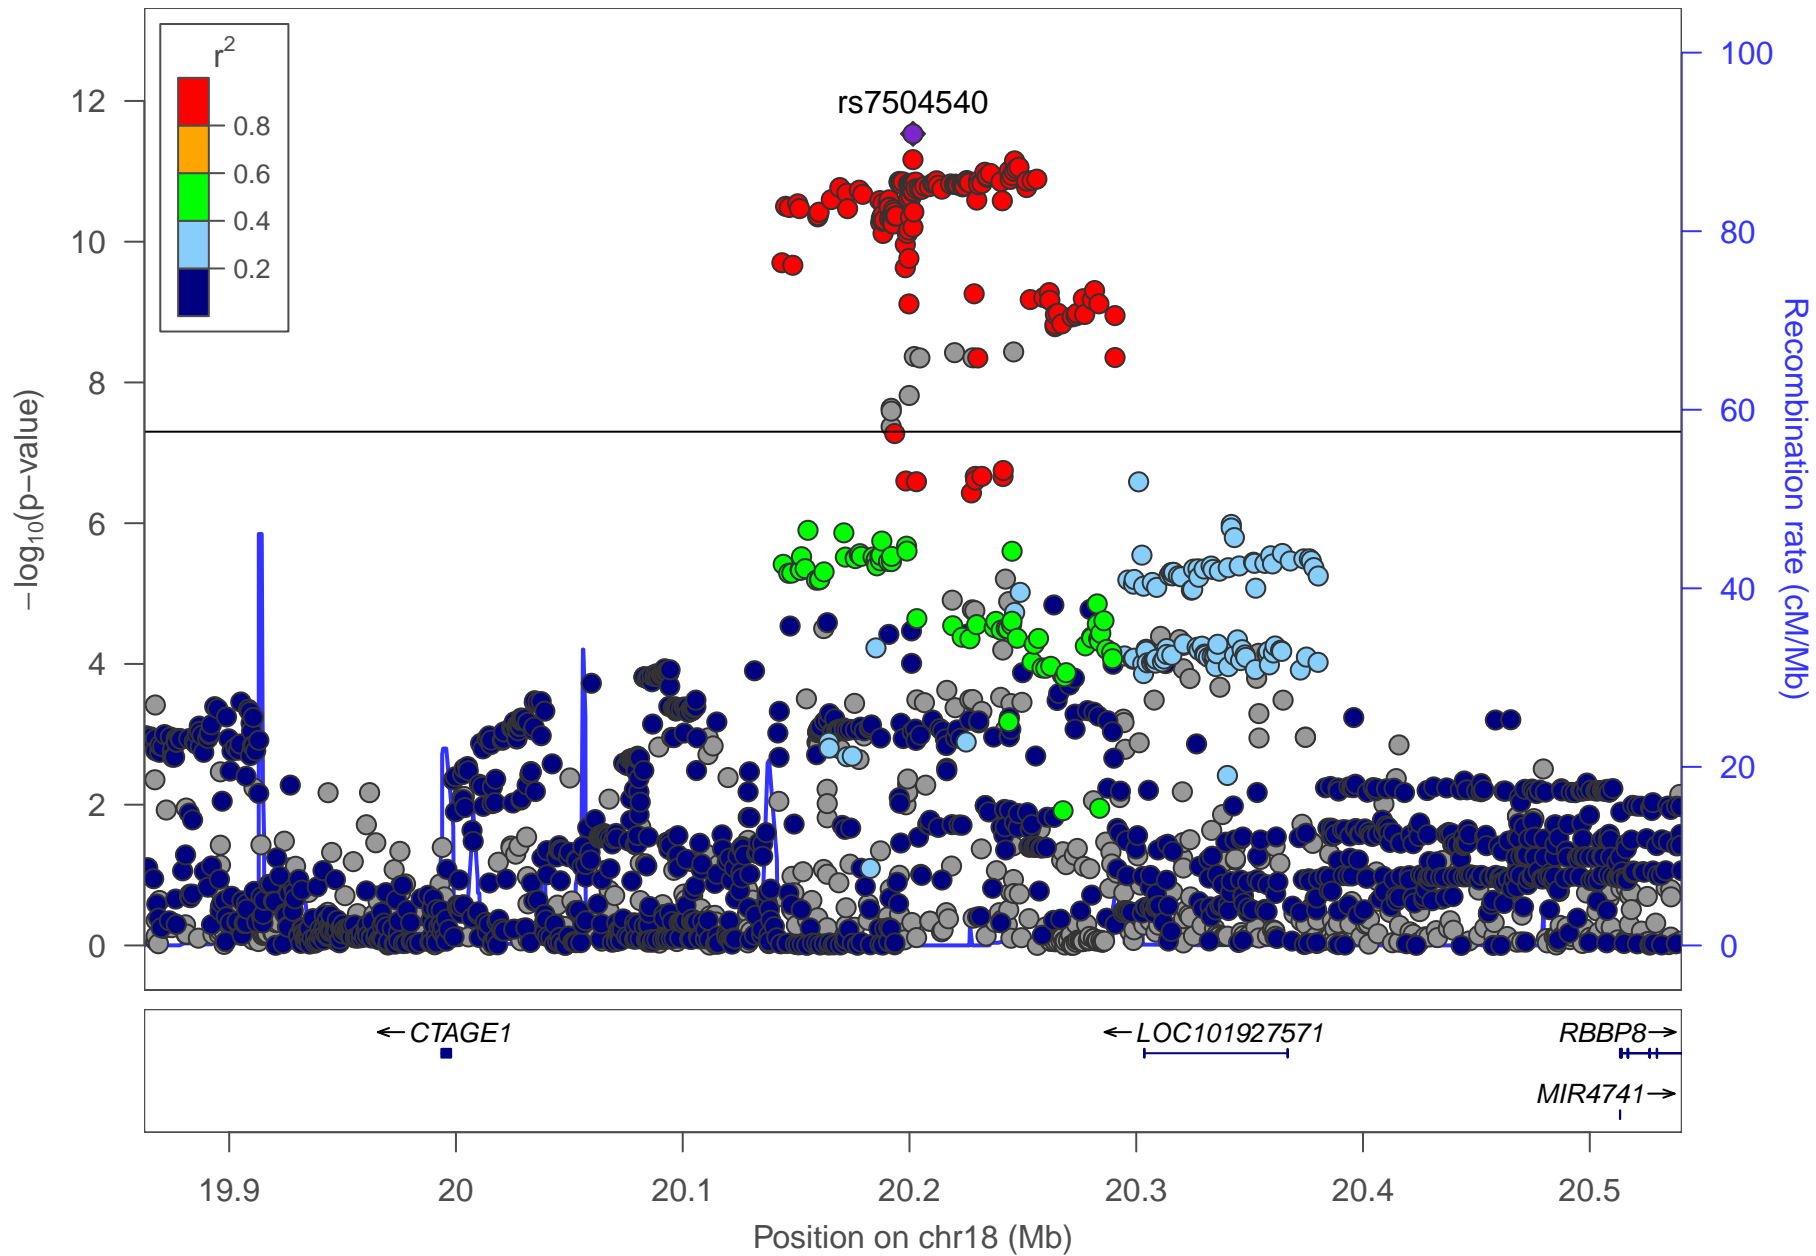

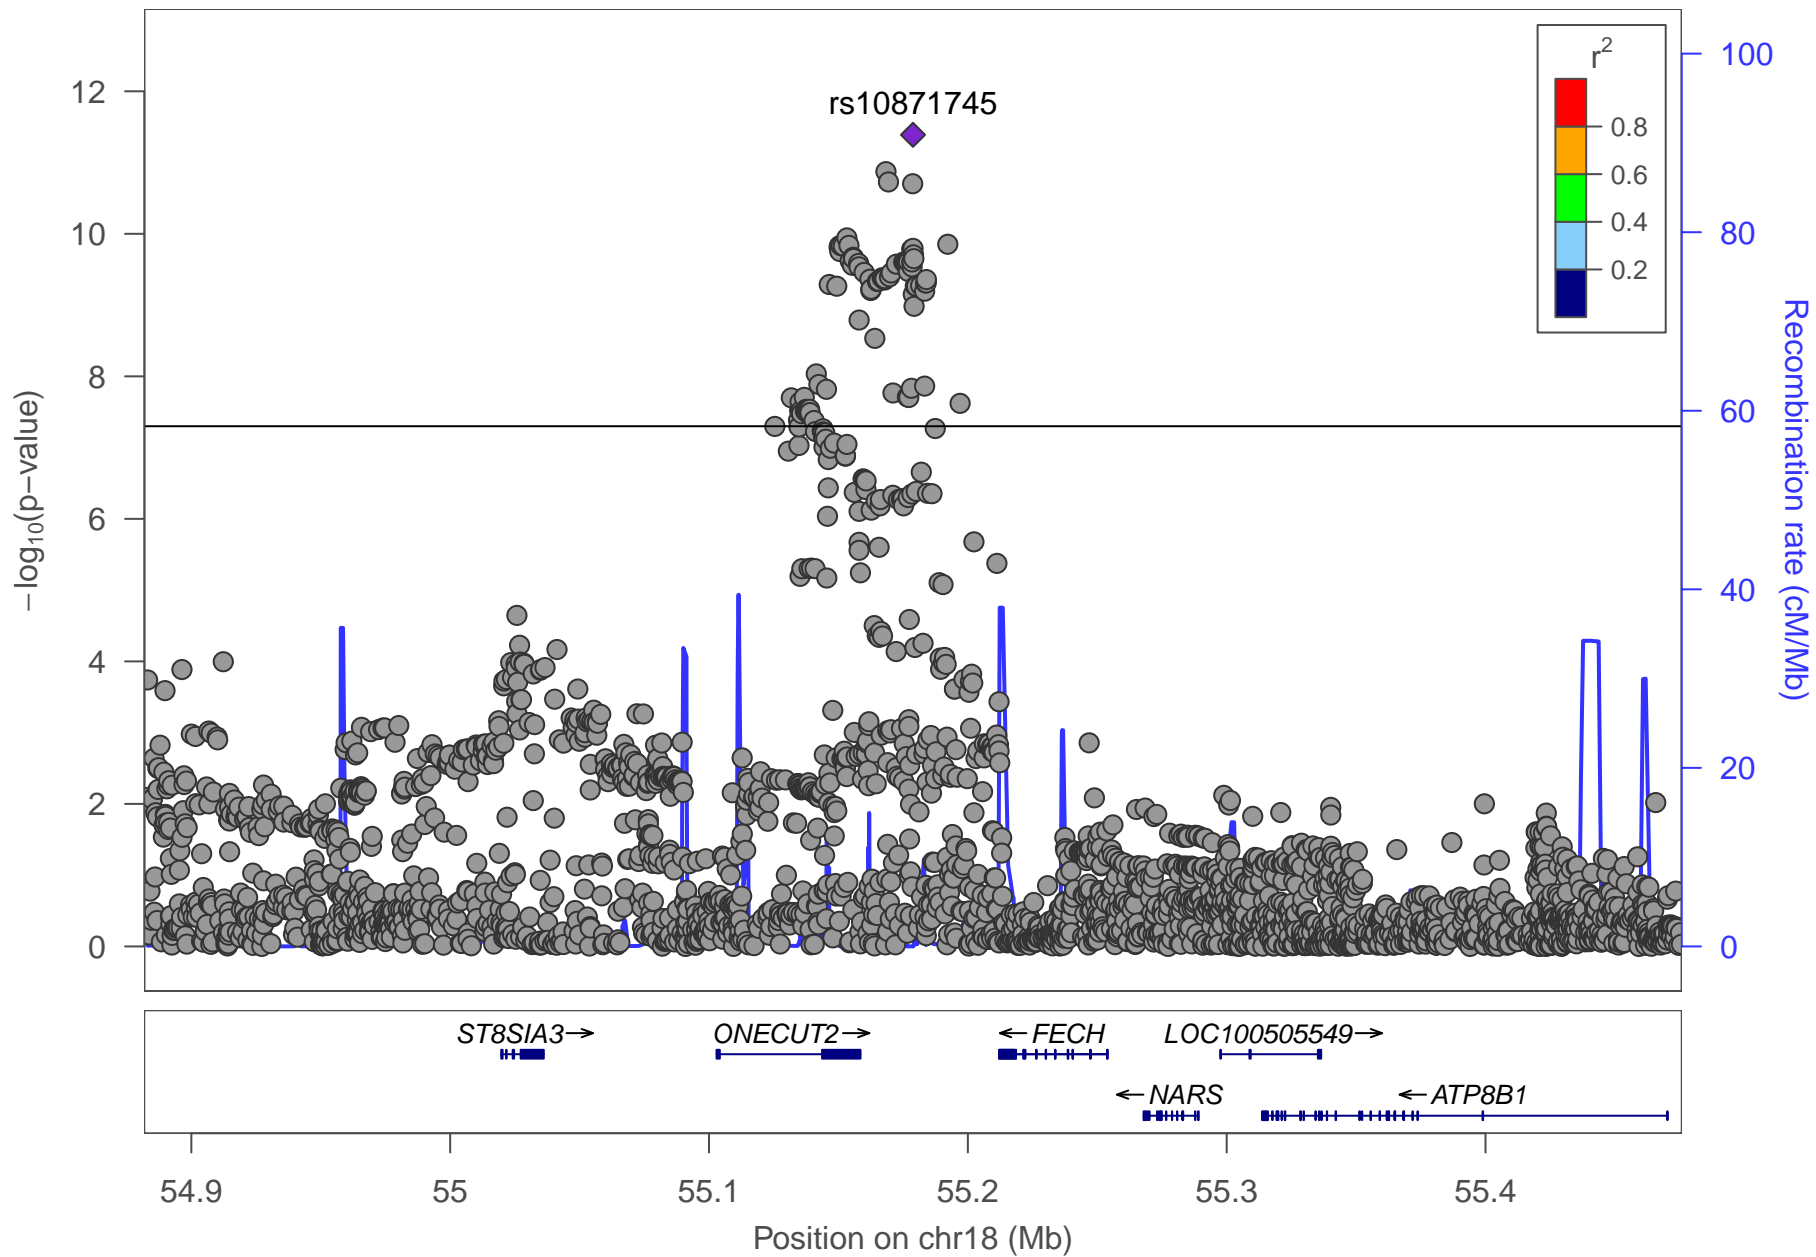

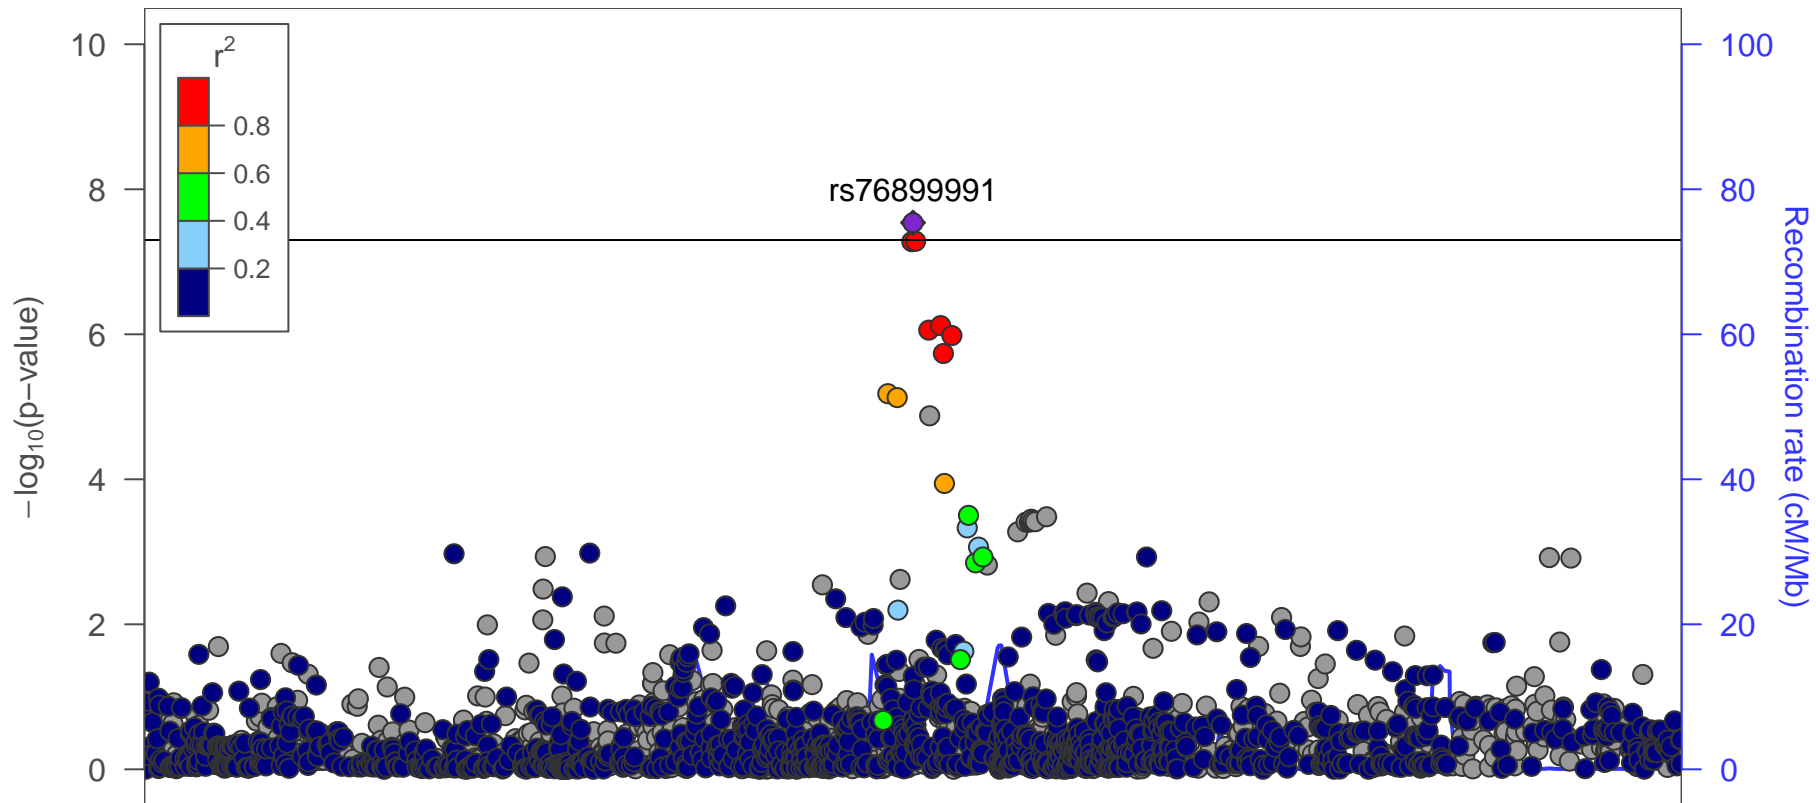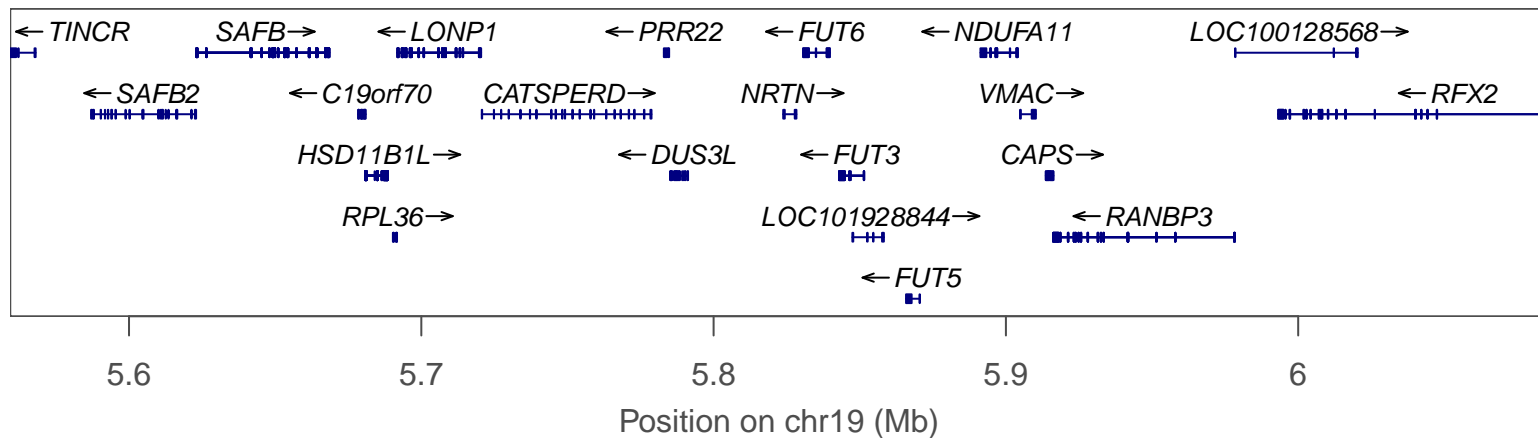

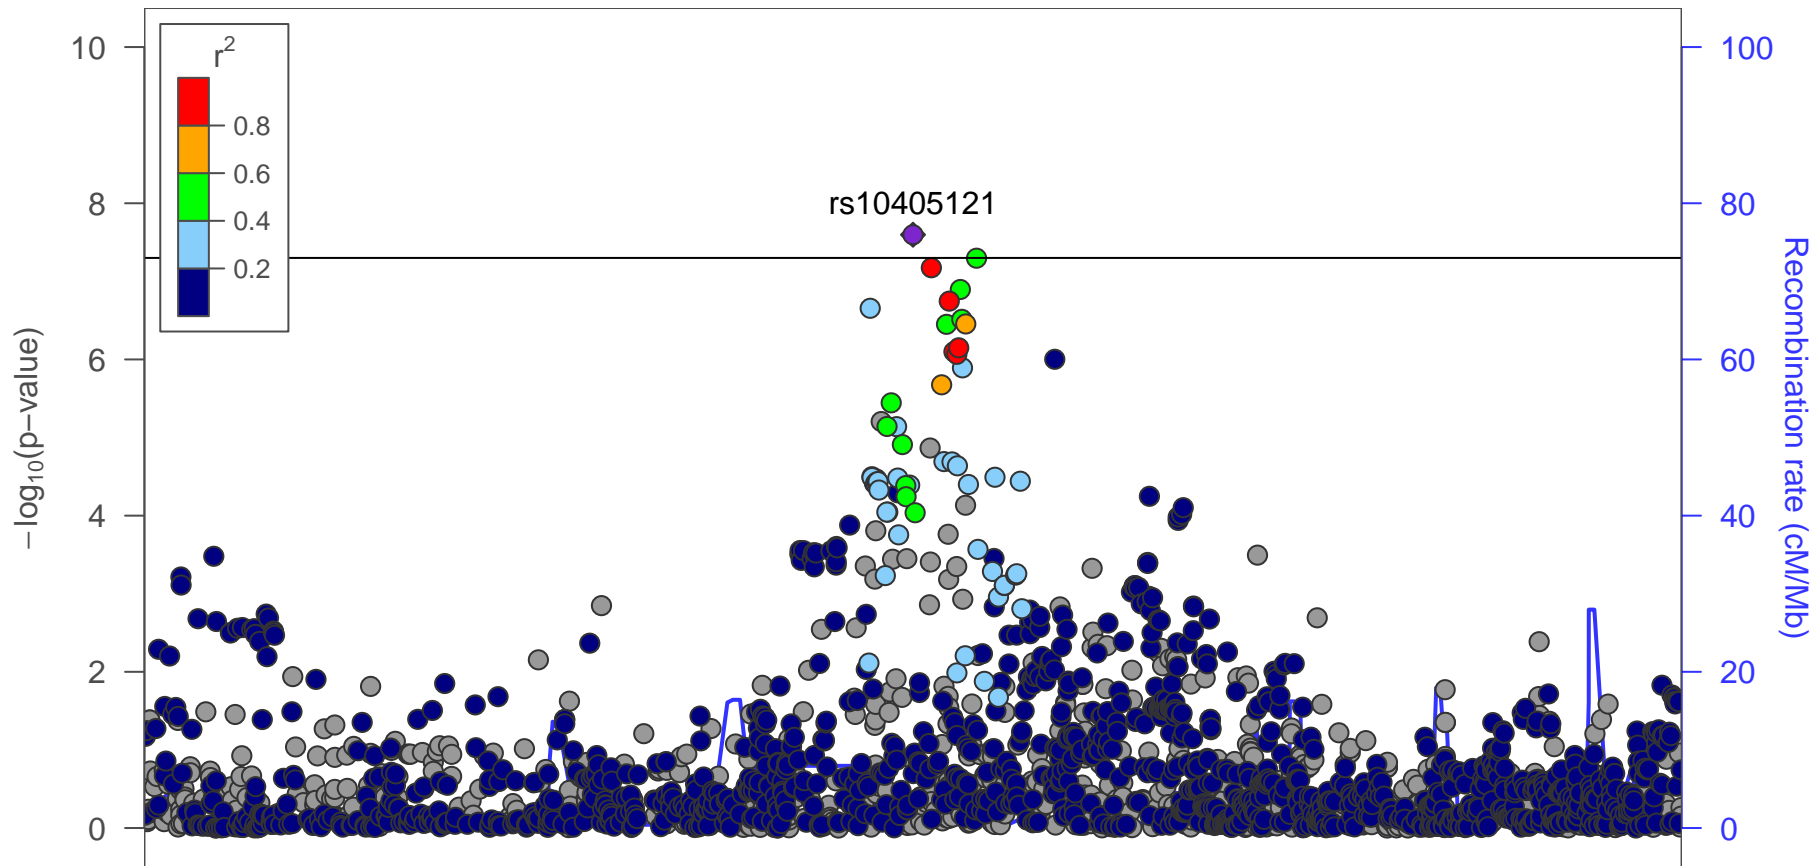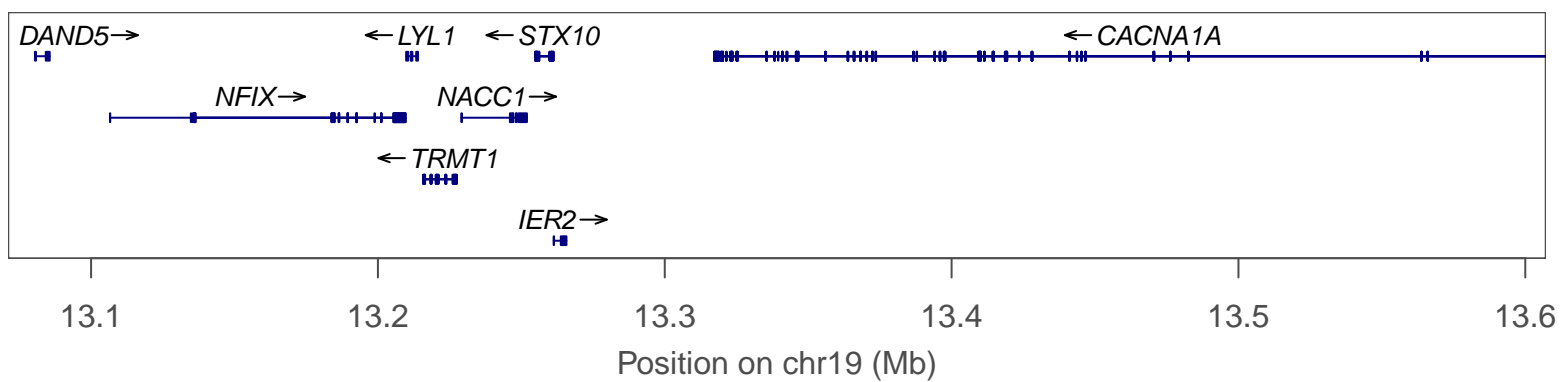



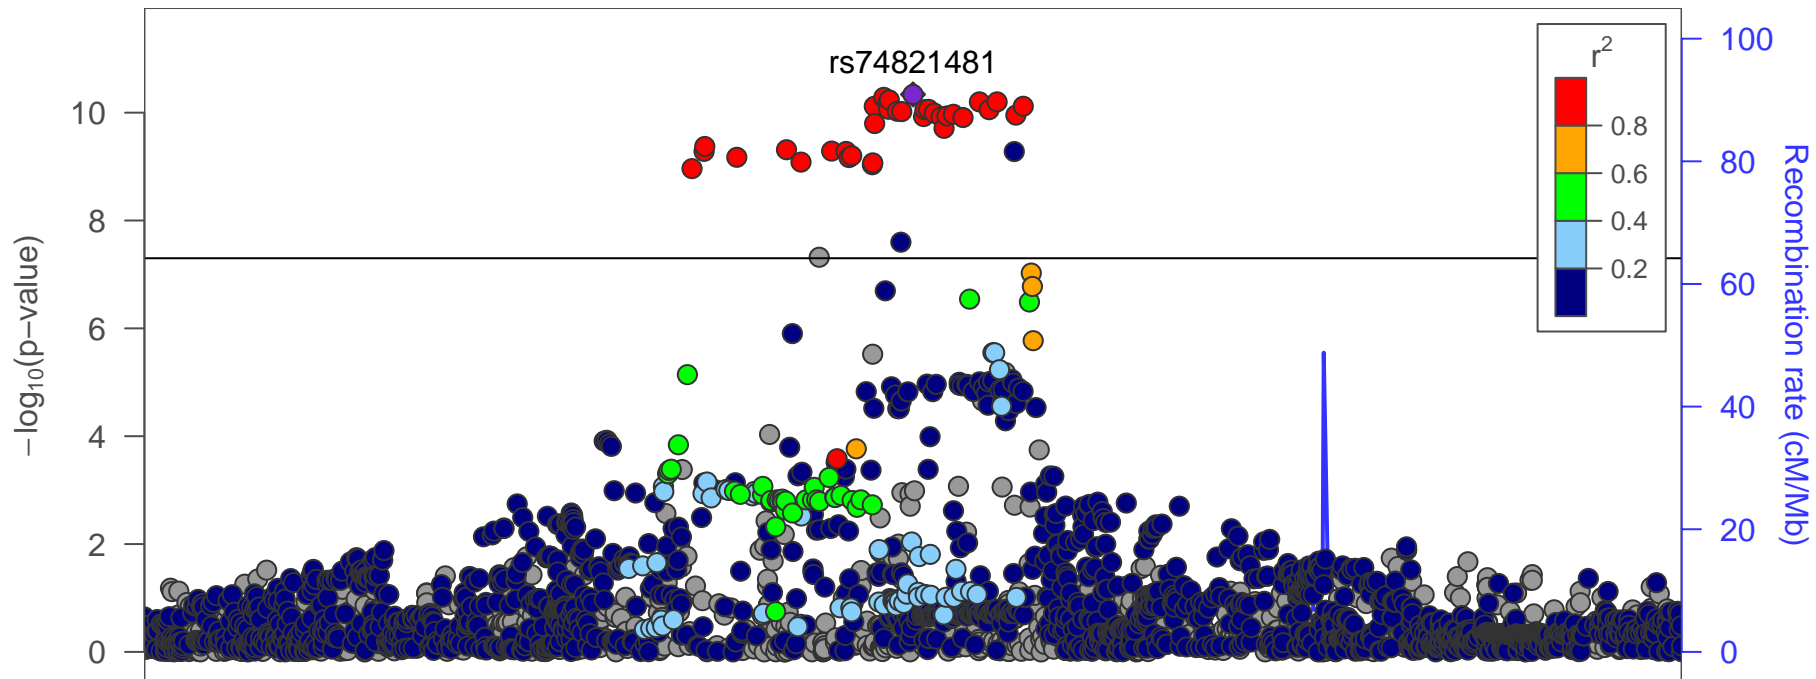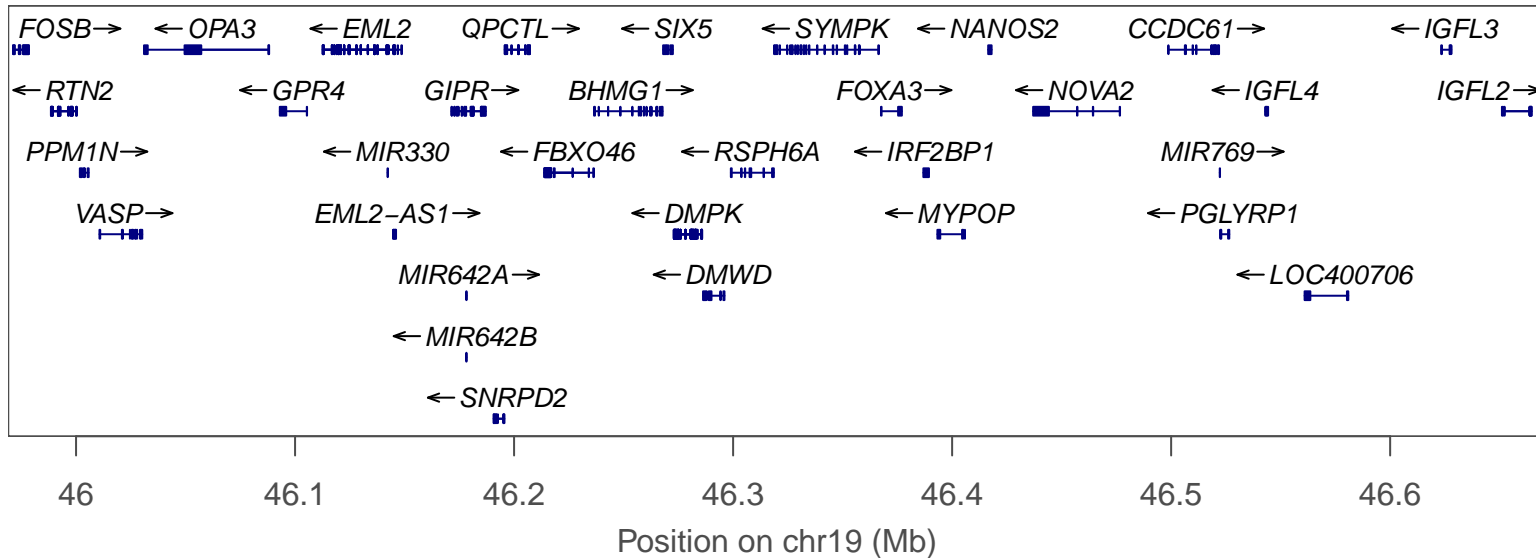

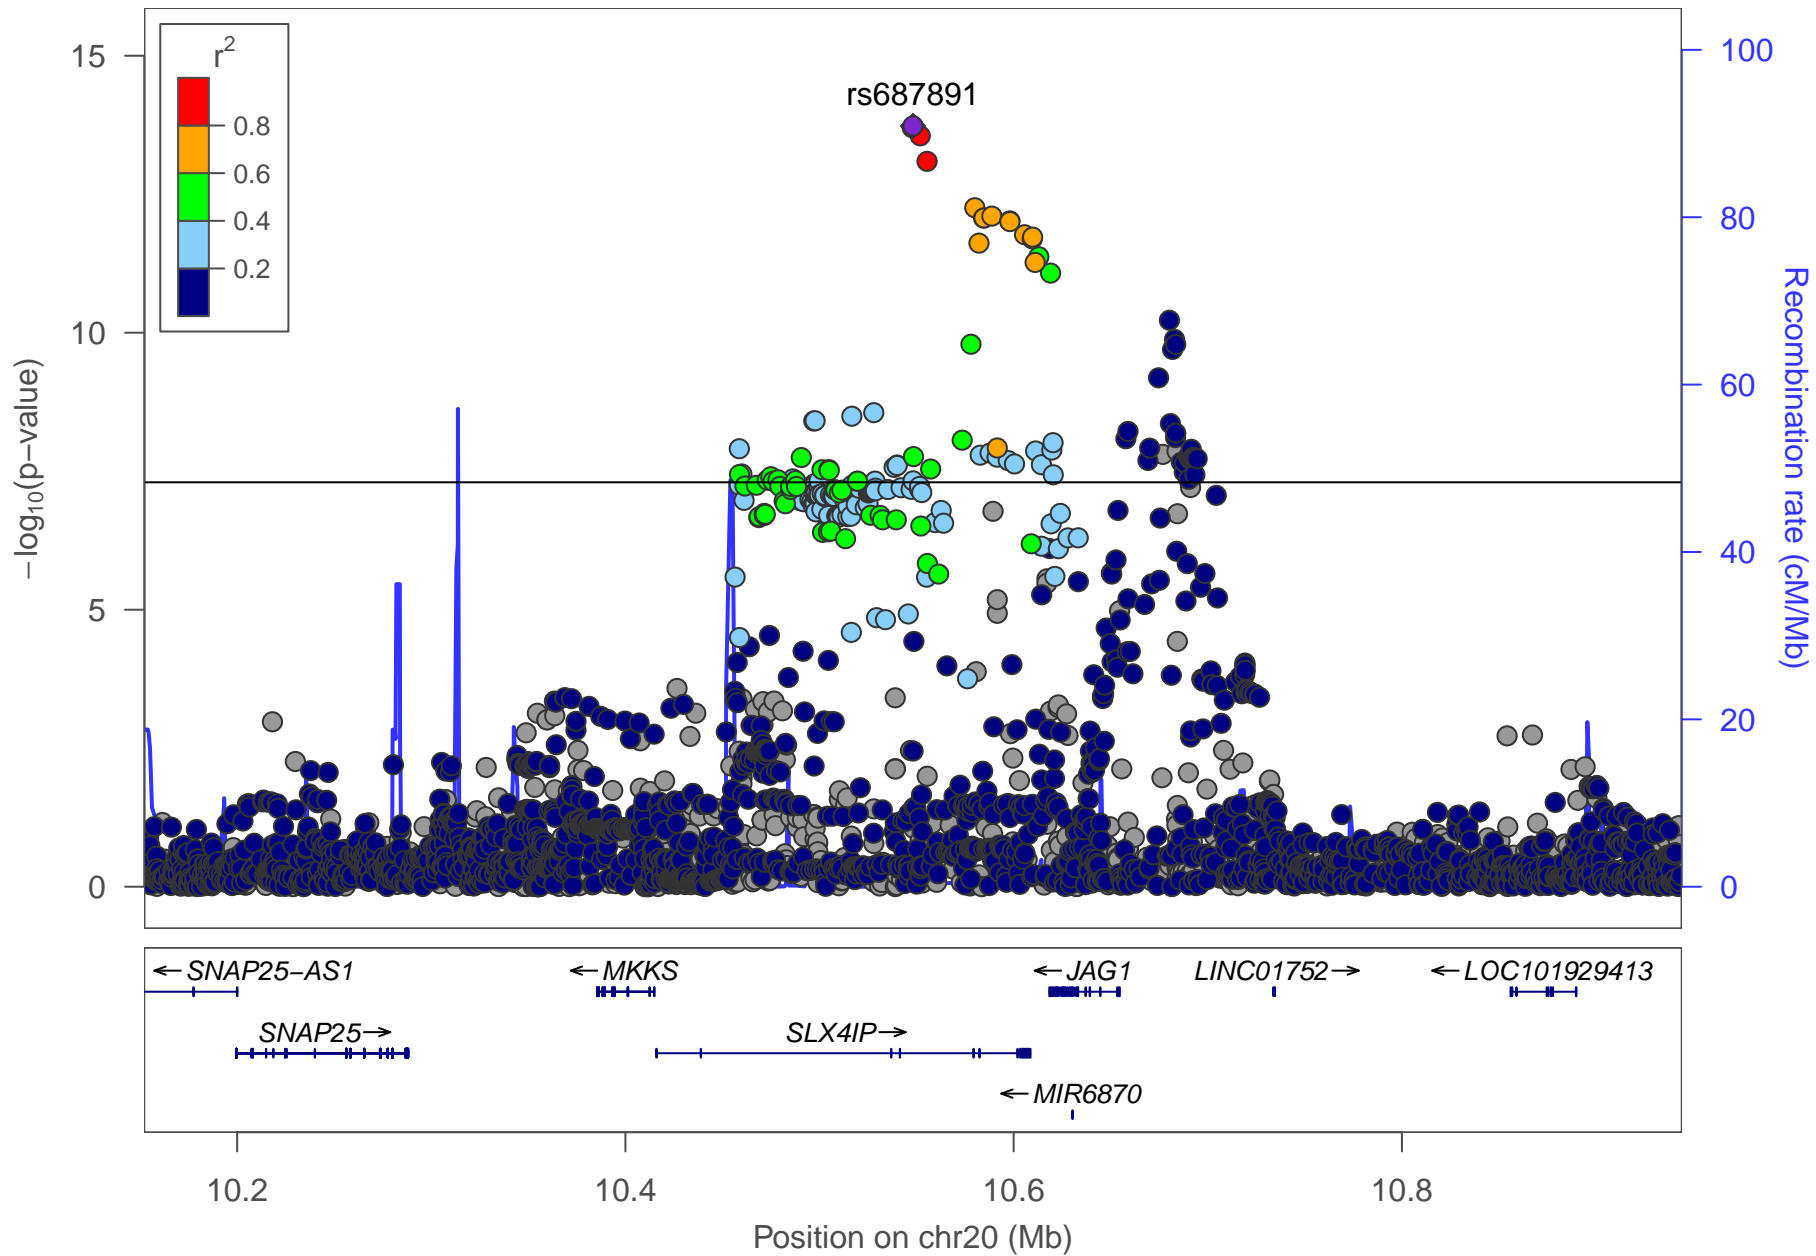

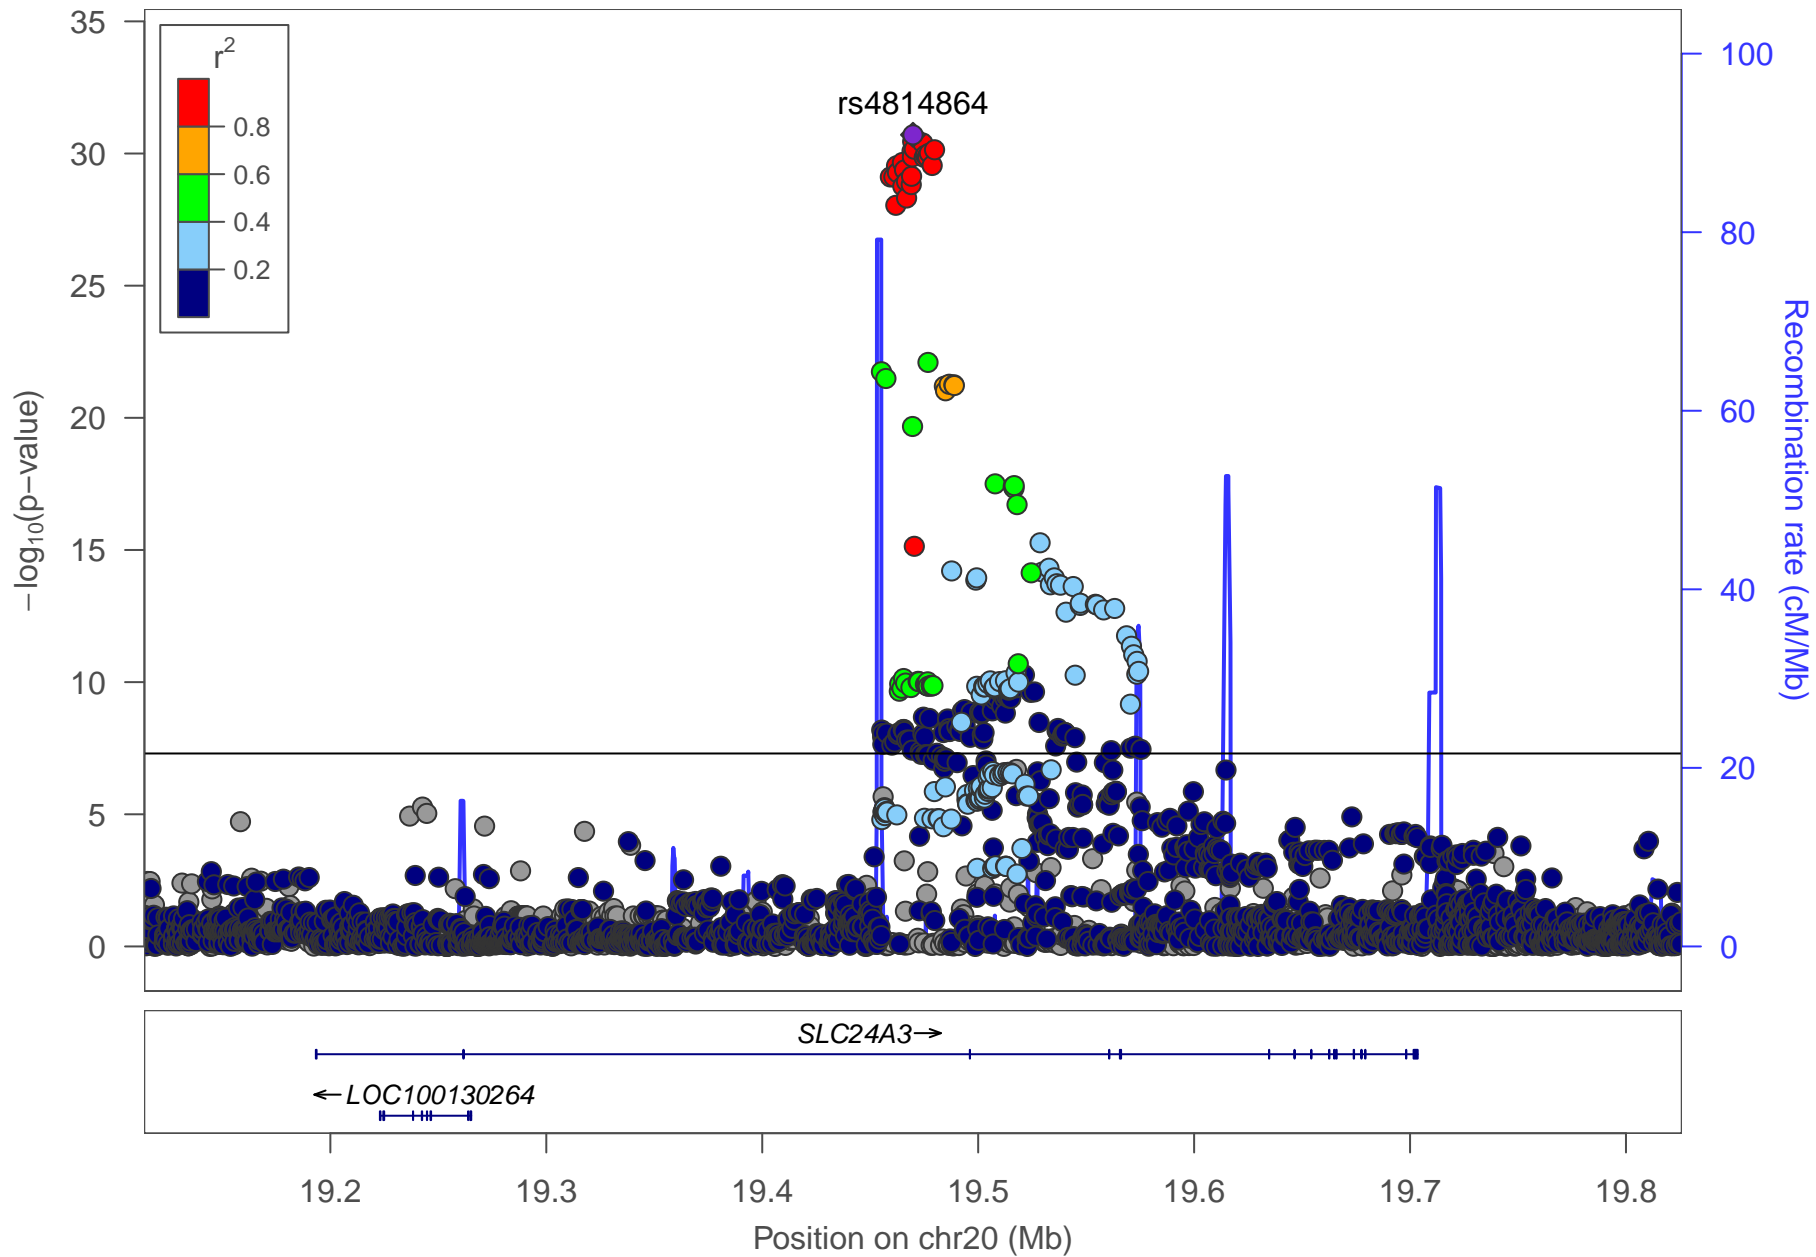

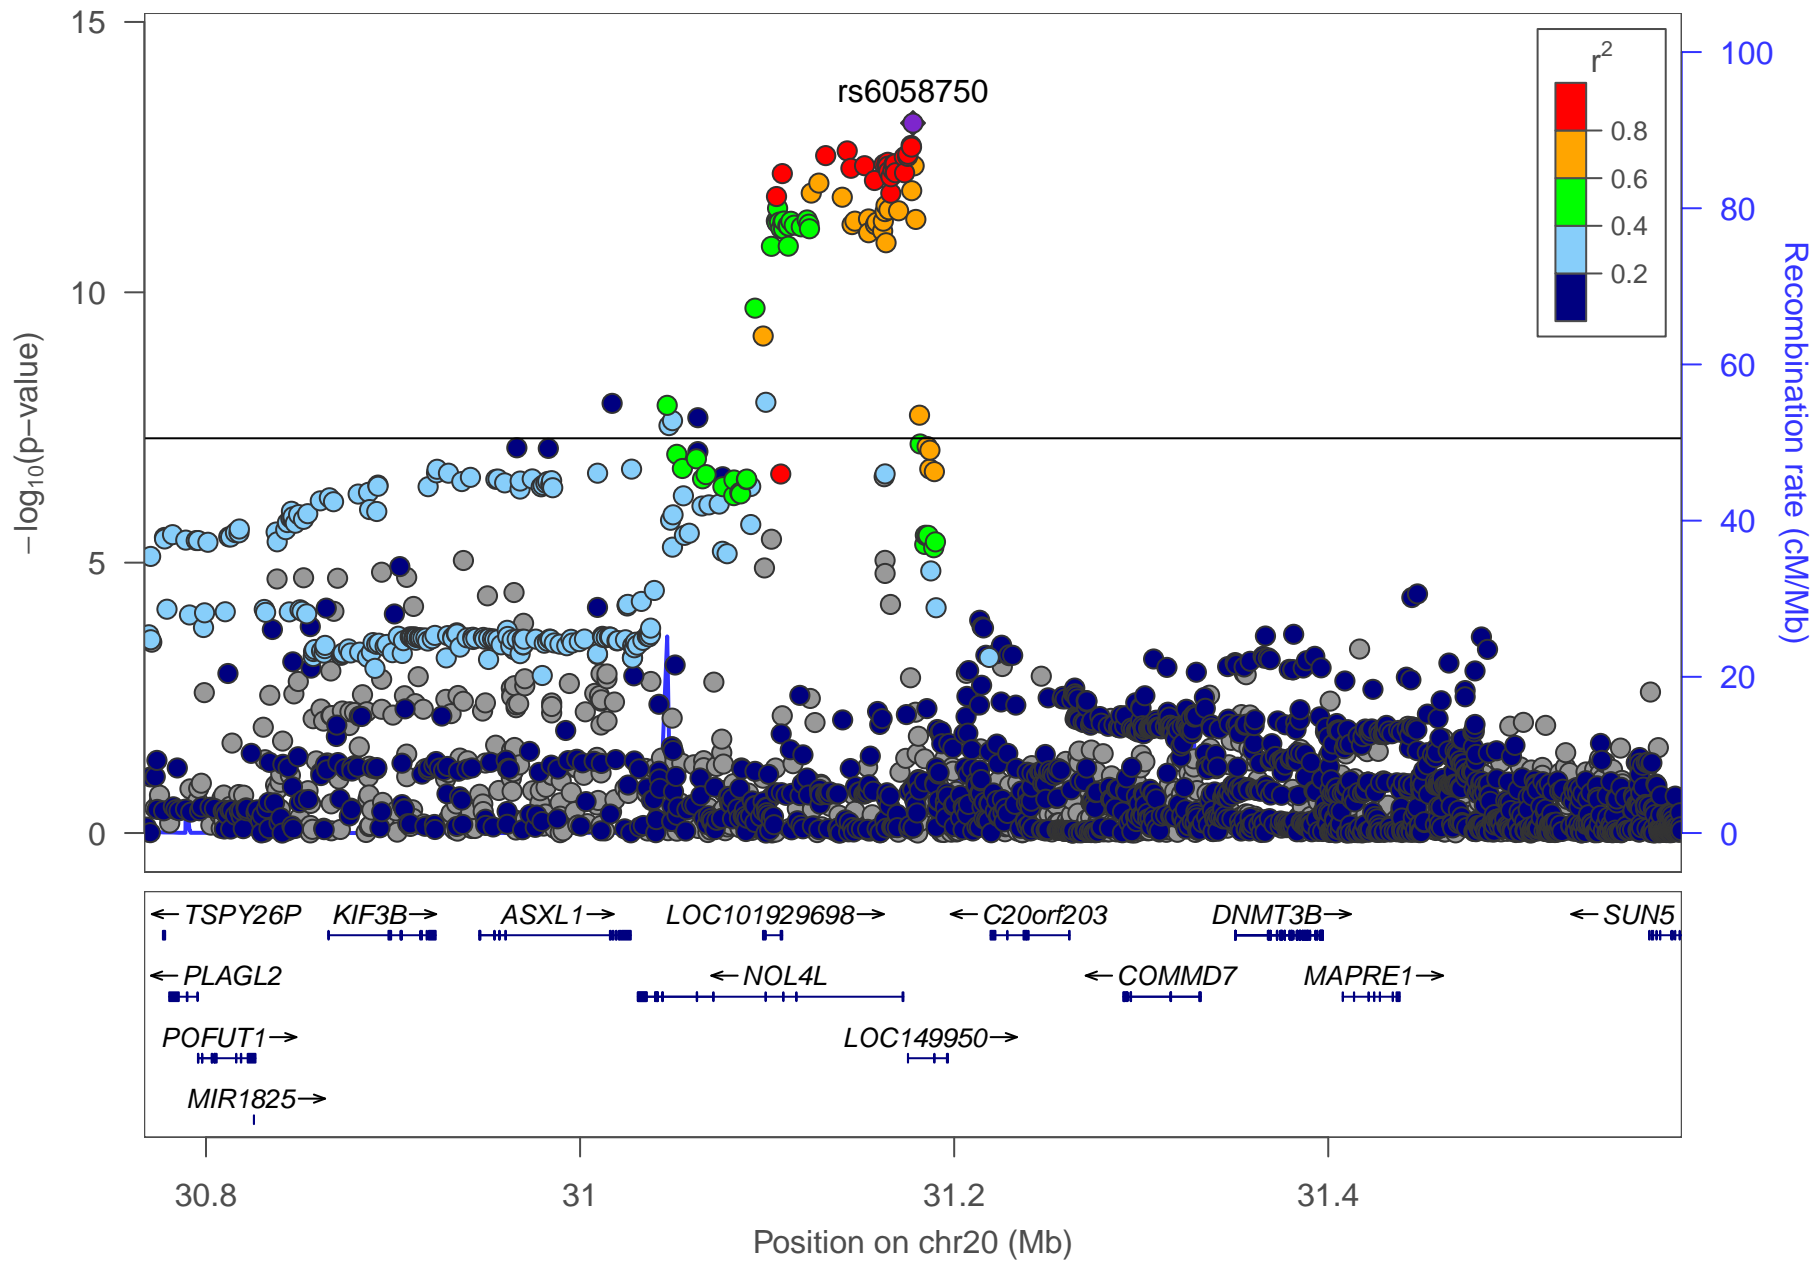

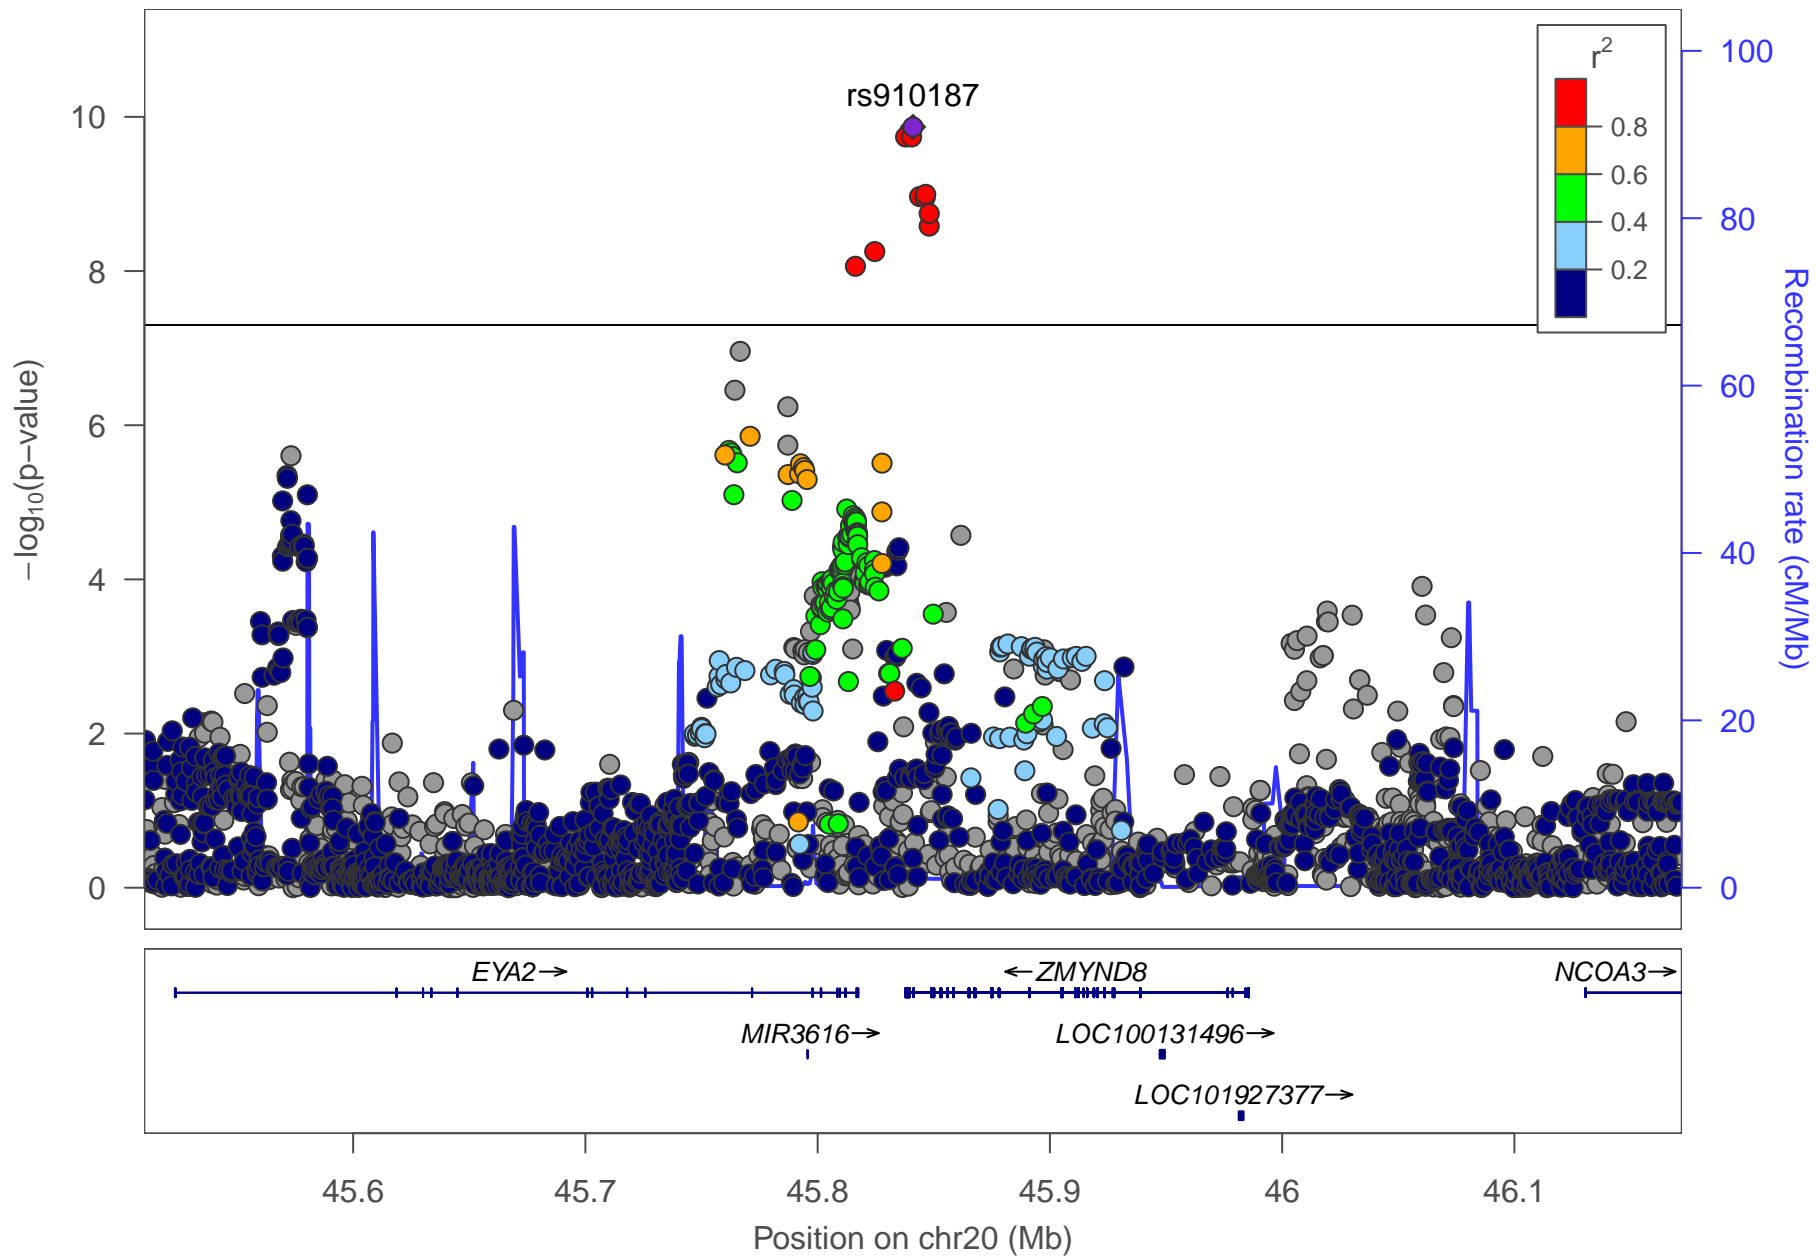

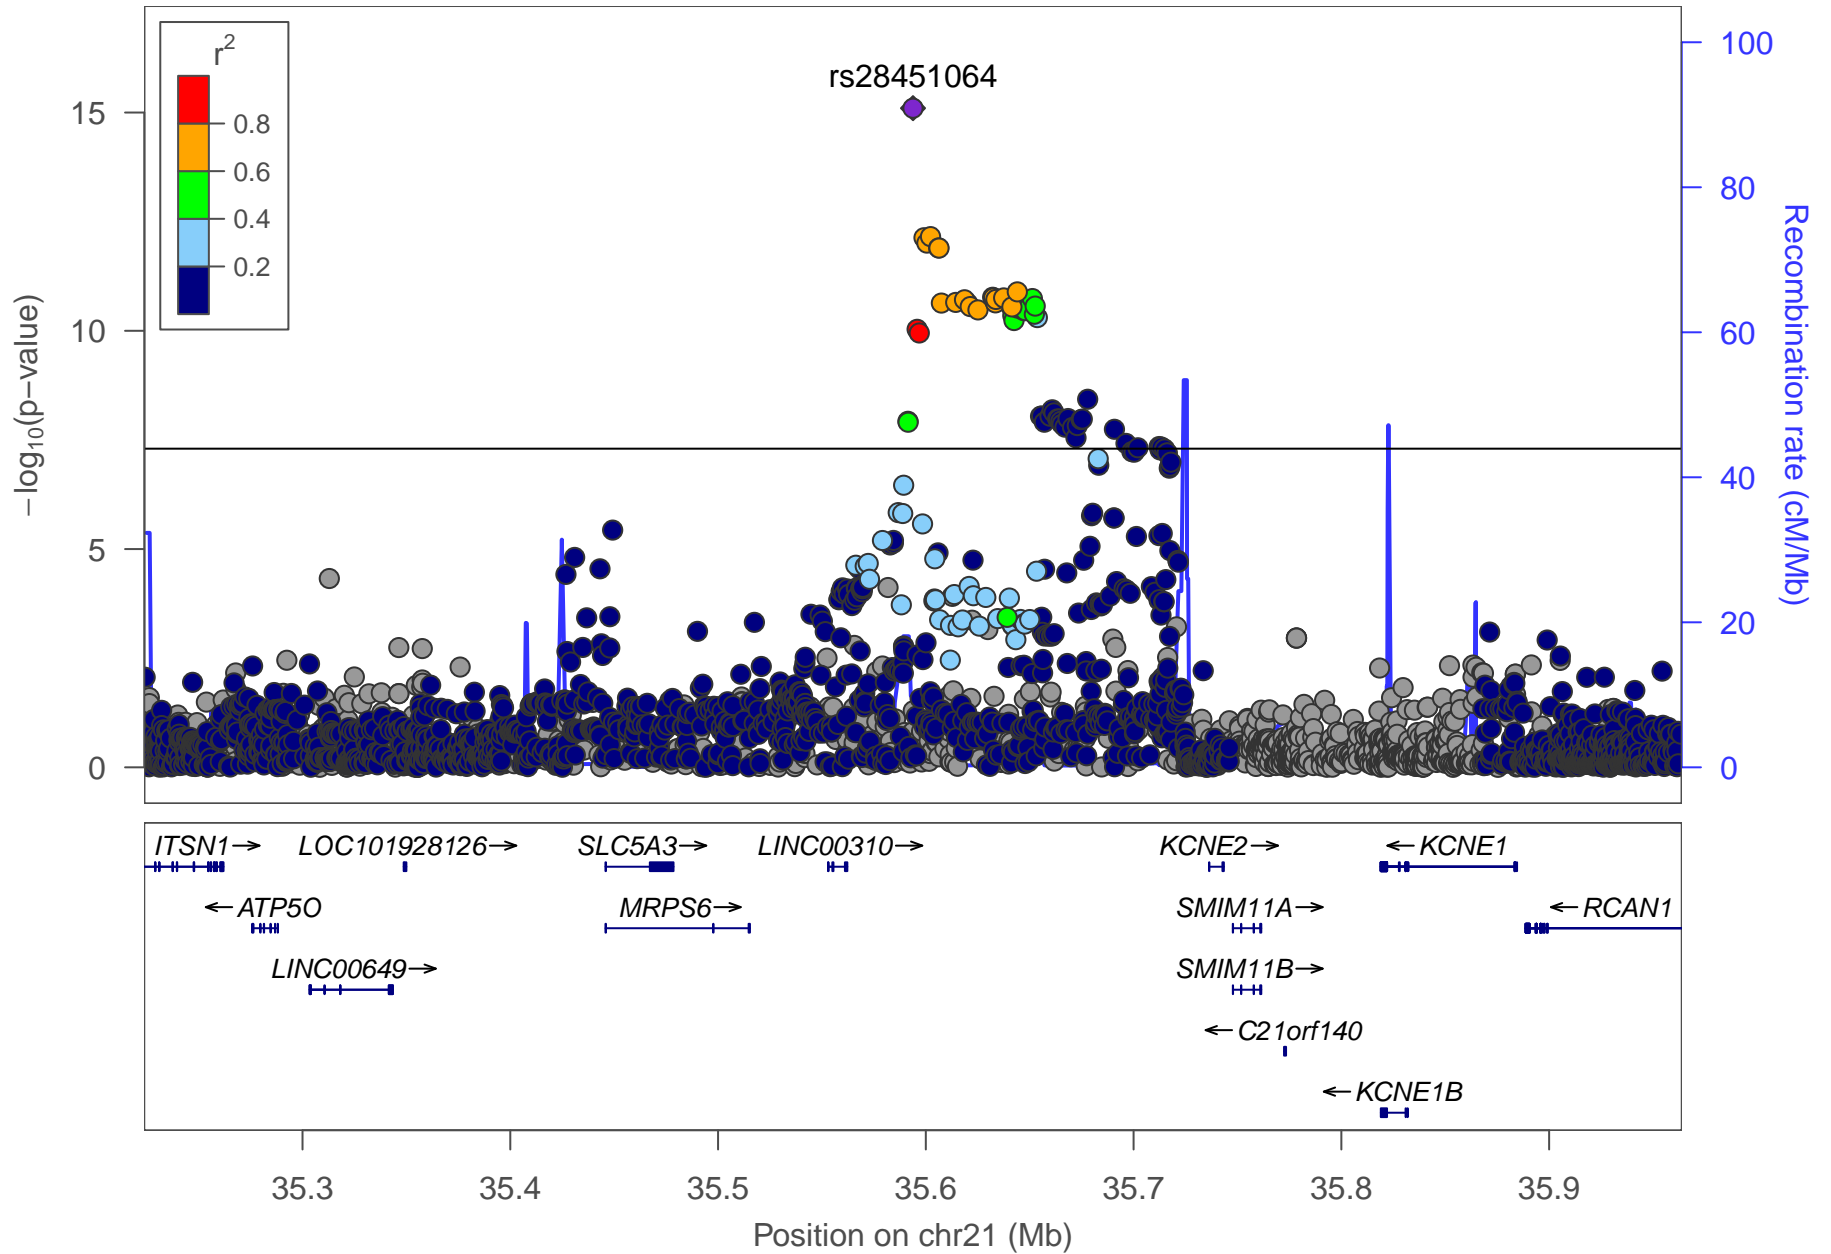

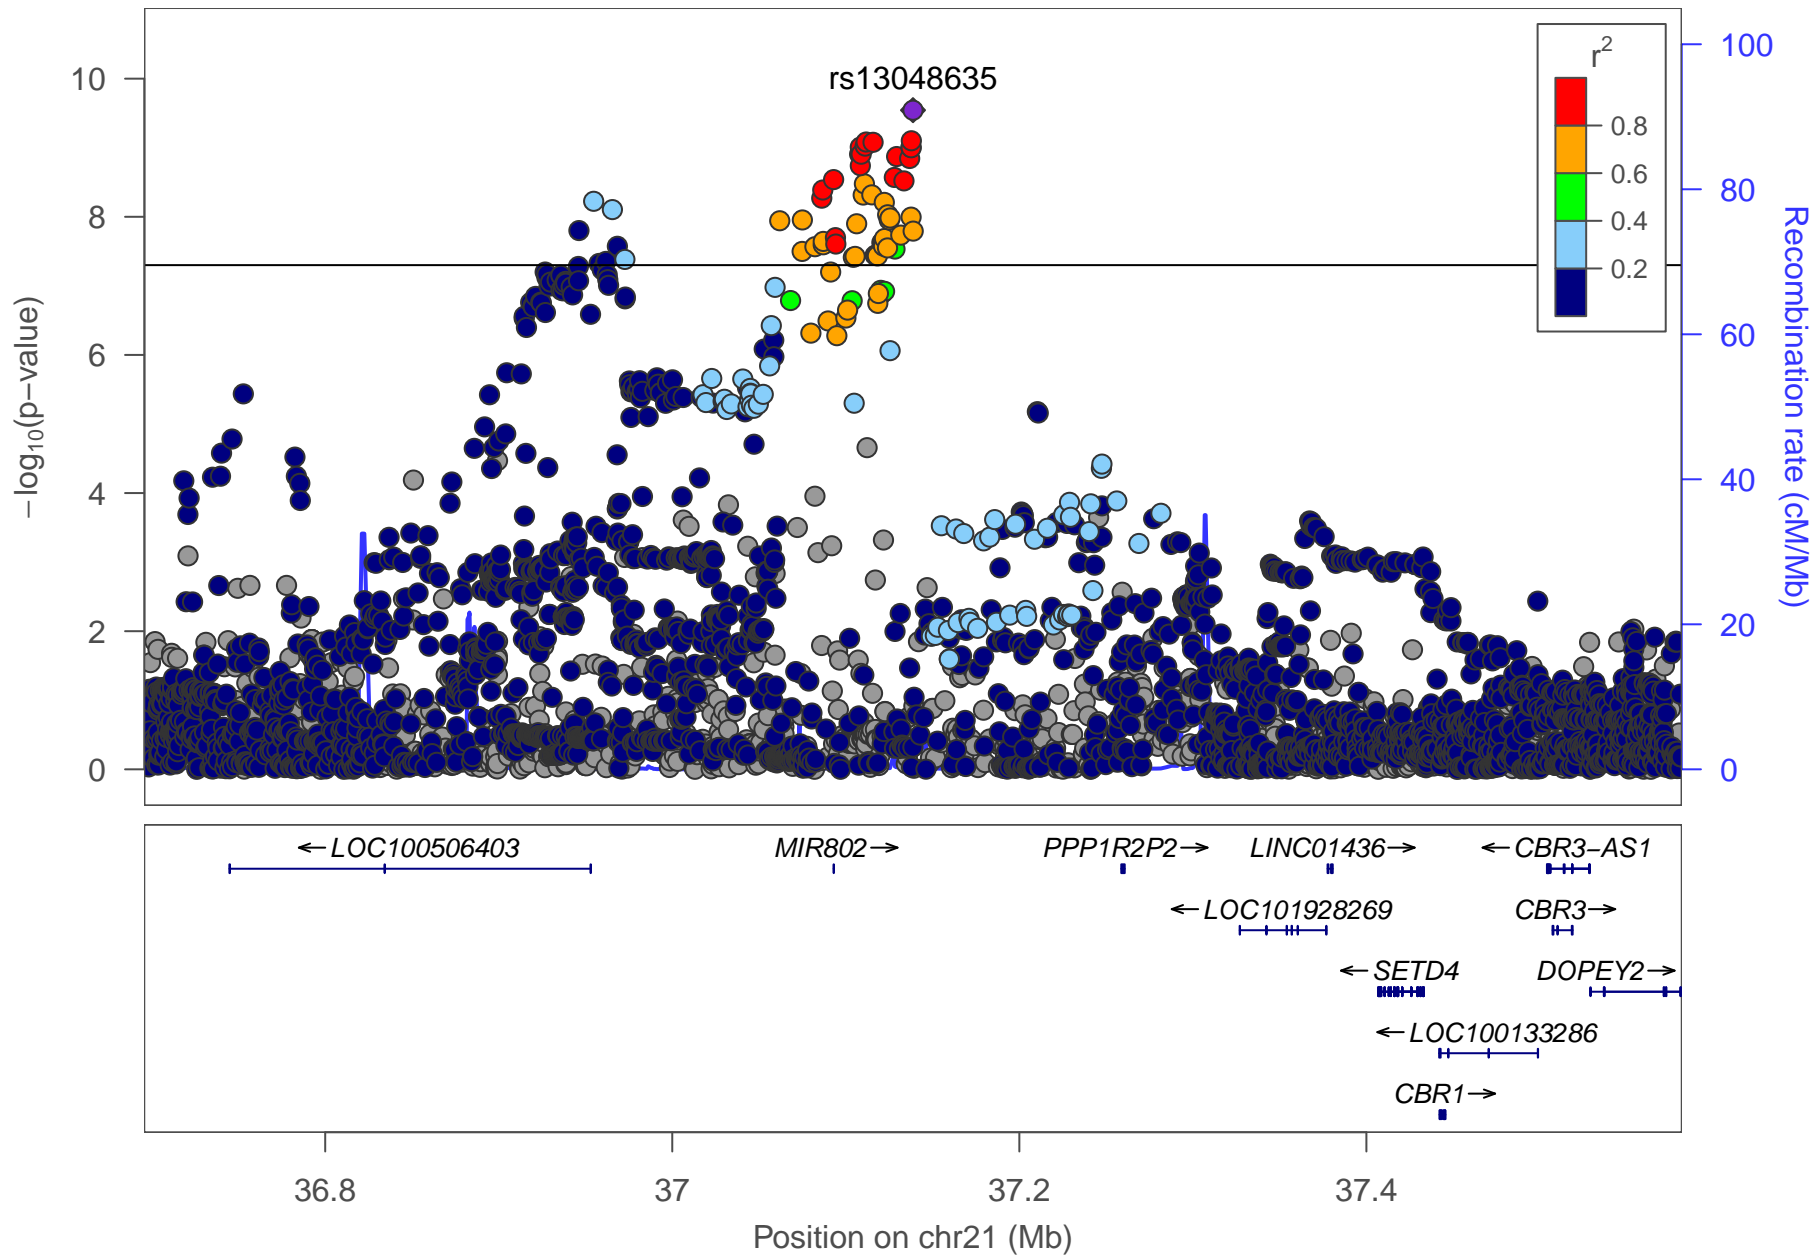

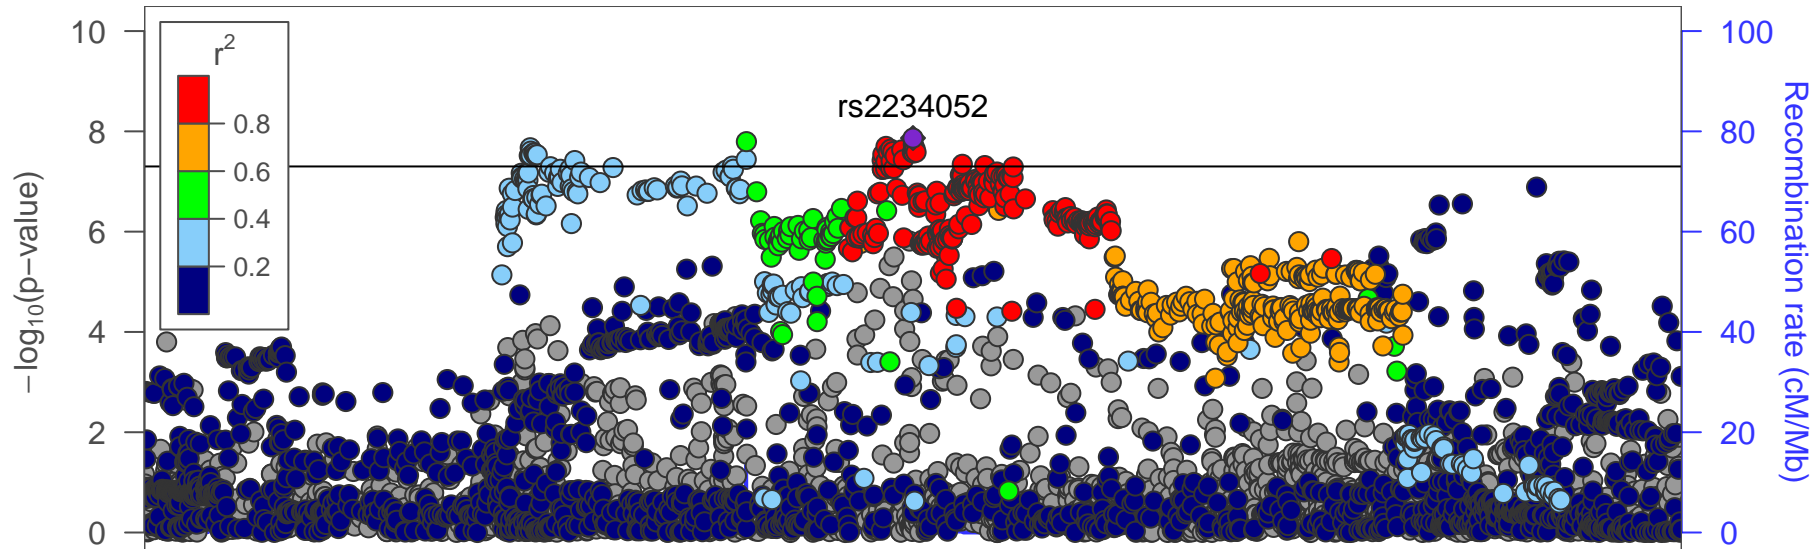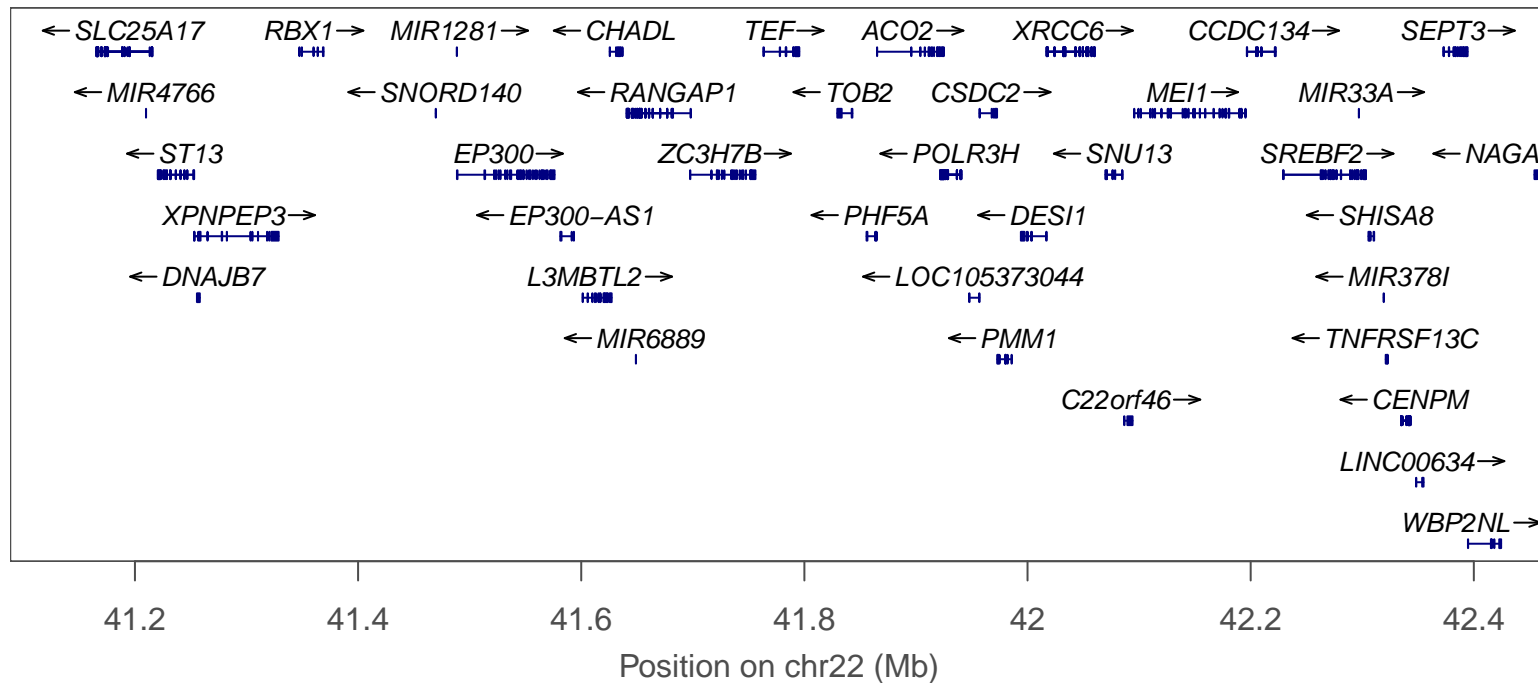



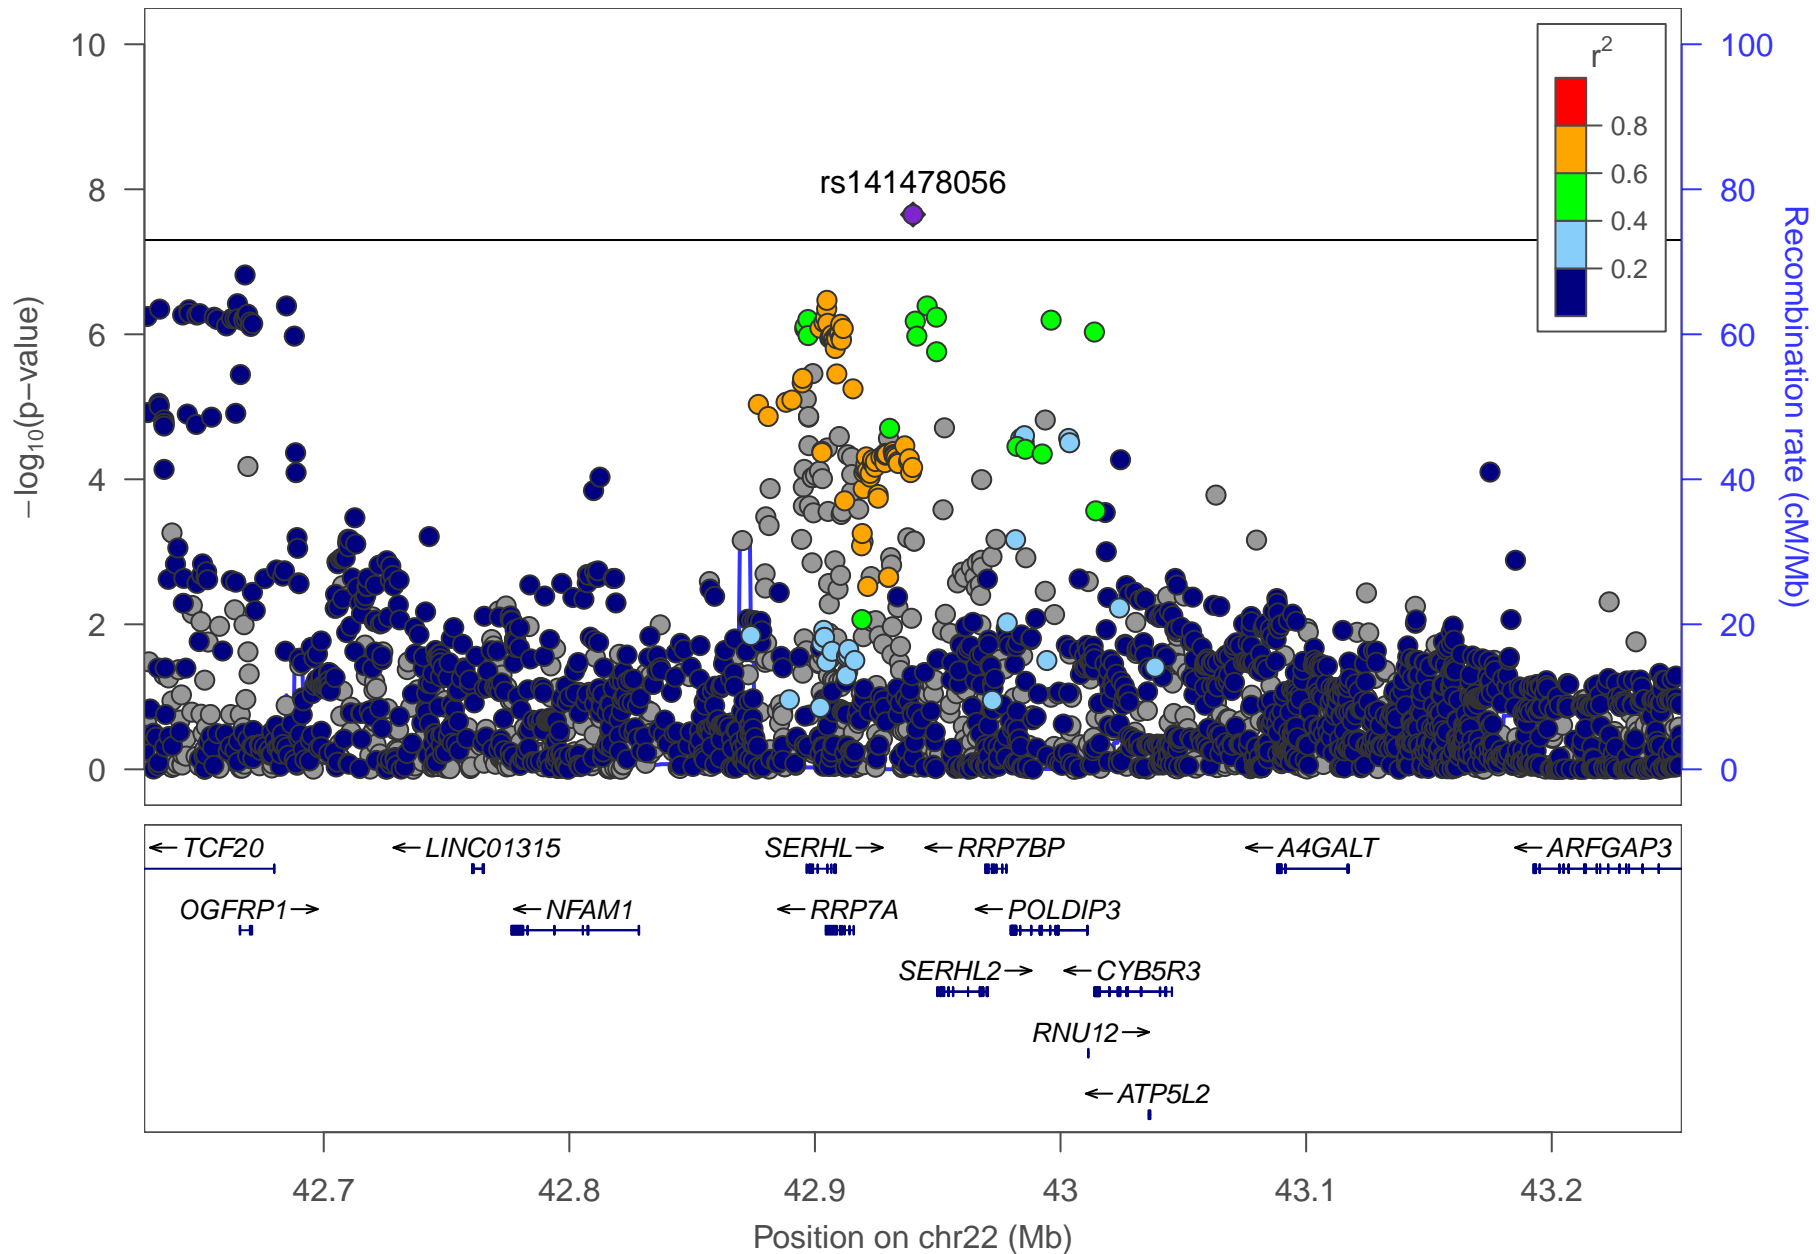

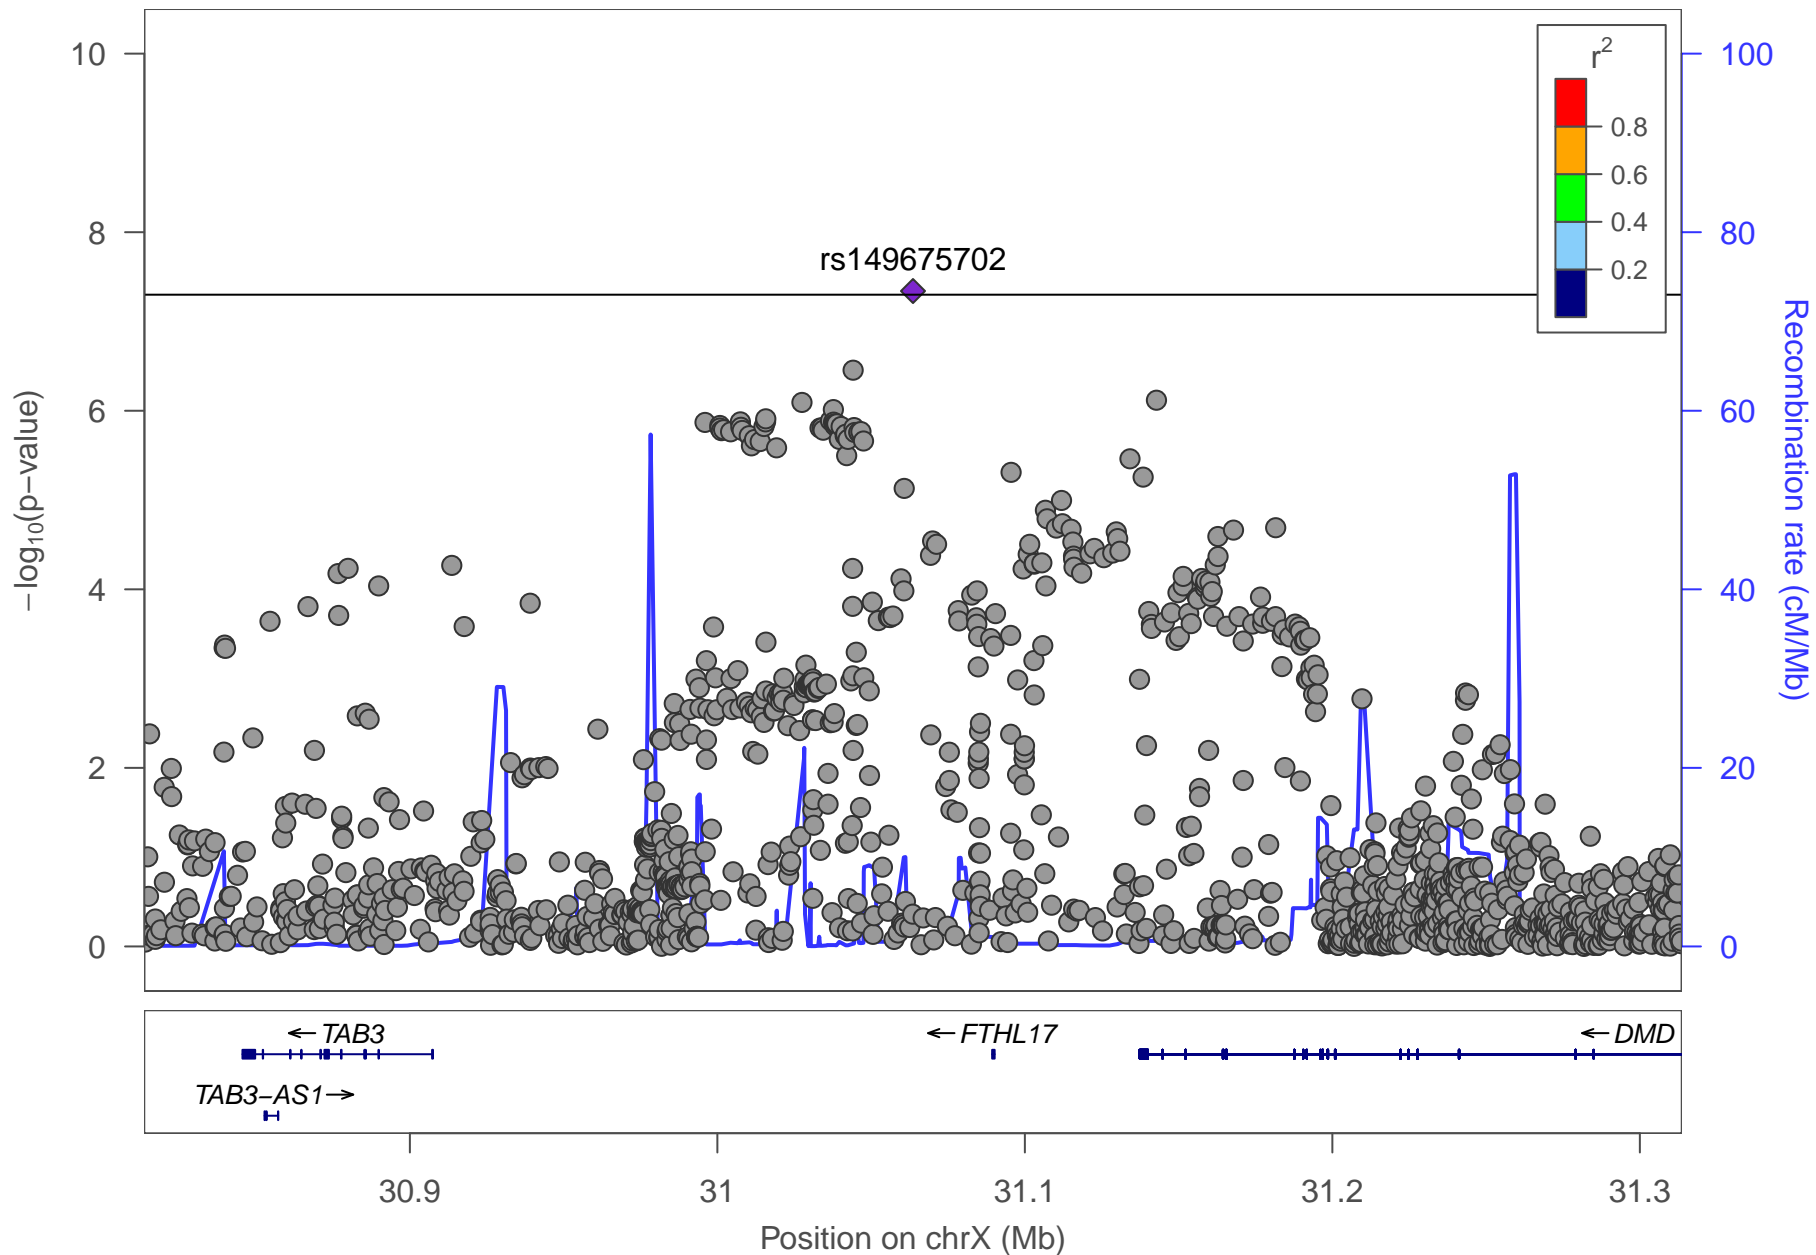

Supplement: media-2.pdf [file media-2.pdf]
