# Supplementary material for: Fine-mapping a genome-wide meta-analysis of 98,374 migraine cases identifies 181 sets of candidate causal variants
Source: PubMed Central journal article supplement (PMC11451805; doi:10.1101/2024.05.20.24307608), 2024-05-20
Supplement: media-1.pdf [file media-1.pdf]

rs10218452 (G)

BETA

BETA

95%-CI

P-value

**Discovery**

UKBB

FinnGen

23andMe

**Fixed effects model**

$I^2 = 89\%$

**Replication**

IHGC16noFIno23

HUNT

**Fixed effects model**

$I^2 = 0\%$

**Fixed effects model**

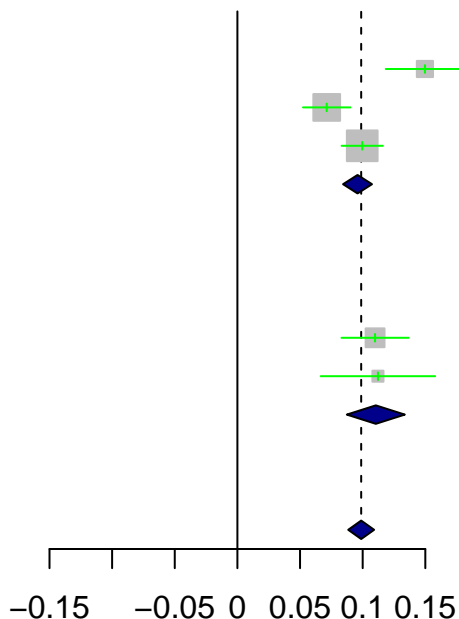

0.15 [0.12; 0.18]

0.07 [0.05; 0.09]

0.10 [0.08; 0.12]

**0.10 [0.08; 0.11] 1.96e-59**

0.11 [0.08; 0.14]

0.11 [0.07; 0.16]

**0.11 [0.09; 0.13] 8.17e-21**

**0.10 [0.09; 0.11] 2.70e-78**

rs779314964 (D)

BETA

BETA

95%-CI

P-value

**Discovery**

UKBB

FinnGen

23andMe

**Fixed effects model**

$I^2 = 72\%$

**Replication**

IHGC16noFIno23

HUNT

**Fixed effects model**

$I^2 = 0\%$

**Fixed effects model**

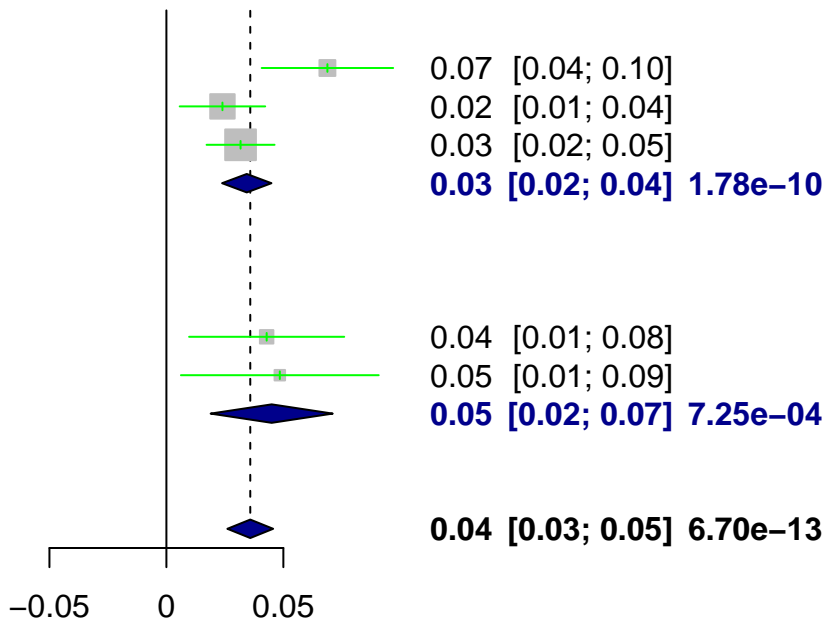

rs71014329 (I)

BETA

BETA

95%-CI

P-value

**Discovery**

UKBB

FinnGen

23andMe

**Fixed effects model**

$r^2 = 17\%$

**Replication**

IHGC16noFIno23

HUNT

**Fixed effects model**

not applicable

**Fixed effects model**

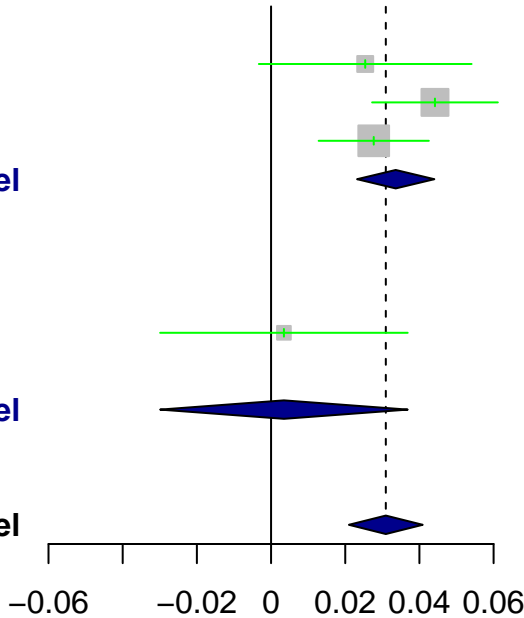

rs28739509 (C)

BETA

BETA

95%-CI

P-value

**Discovery**

UKBB

FinnGen

23andMe

**Fixed effects model**

$I^2 = 0\%$

**Replication**

IHGC16noFIno23

HUNT

**Fixed effects model**

$I^2 = 0\%$

**Fixed effects model**

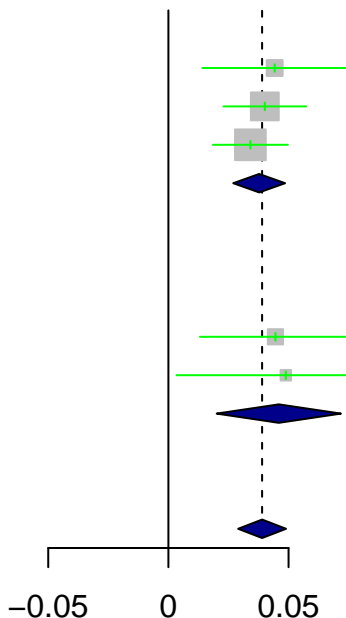

rs783302 (G)

BETA

BETA

95%-CI

P-value

**Discovery**

UKBB

FinnGen

23andMe

**Fixed effects model**

$I^2 = 0\%$

**Replication**

IHGC16noFIno23

HUNT

**Fixed effects model**

$I^2 = 42\%$

**Fixed effects model**

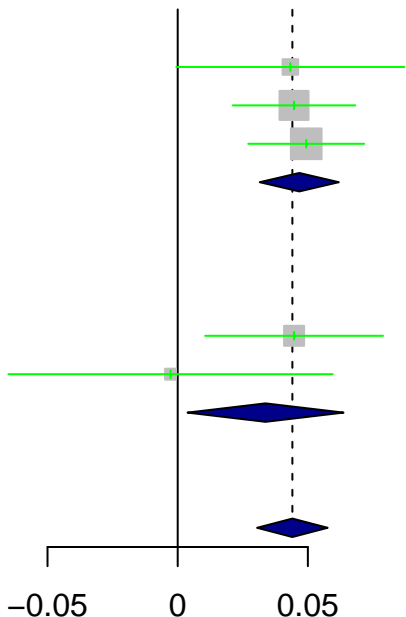

rs1388638853 (D)

BETA

BETA

95%-CI

P-value

**Discovery**

UKBB

FinnGen

23andMe

**Fixed effects model**

$I^2 = 0\%$

**Replication**

IHGC16noFIno23

HUNT

**Fixed effects model**

$I^2 = 0\%$

**Fixed effects model**

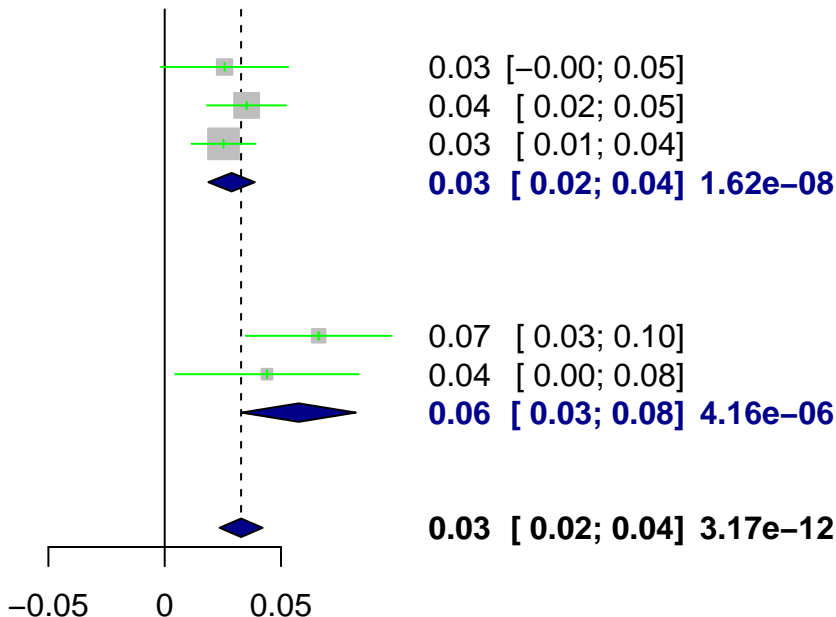

rs1923243 (C)

BETA

BETA

95%-CI

P-value

**Discovery**

UKBB

FinnGen

23andMe

**Fixed effects model**

$I^2 = 56\%$

**Replication**

IHGC16noFIno23

HUNT

**Fixed effects model**

$I^2 = 44\%$

**Fixed effects model**

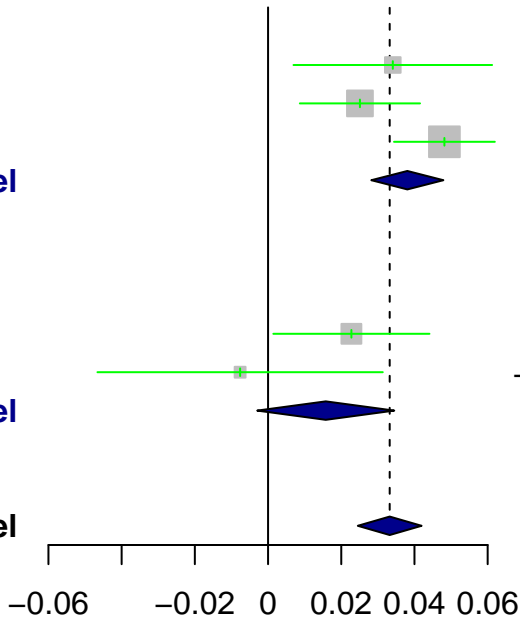

rs11165300 (G)

BETA

BETA

95%-CI

P-value

**Discovery**

UKBB

FinnGen

23andMe

**Fixed effects model**

$I^2 = 48\%$

**Replication**

IHGC16noFIno23

HUNT

**Fixed effects model**

$I^2 = 0\%$

**Fixed effects model**

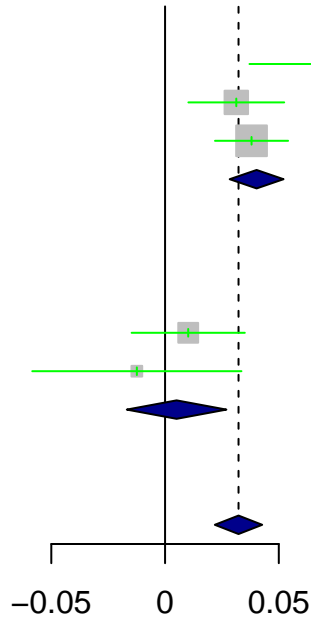

0.07 [0.04; 0.10]

0.03 [0.01; 0.05]

0.04 [0.02; 0.05]

**0.04 [0.03; 0.05] 2.68e-11**

0.01 [-0.01; 0.04]

-0.01 [-0.06; 0.03]

**0.01 [-0.02; 0.03] 6.50e-01**

**0.03 [0.02; 0.04] 1.19e-09**



rs12134493 (A)

BETA

BETA

95%-CI

P-value

**Discovery**

UKBB

FinnGen

23andMe

**Fixed effects model**

$I^2 = 66\%$

**Replication**

IHGC16noFIno23

HUNT

**Fixed effects model**

$I^2 = 0\%$

**Fixed effects model**

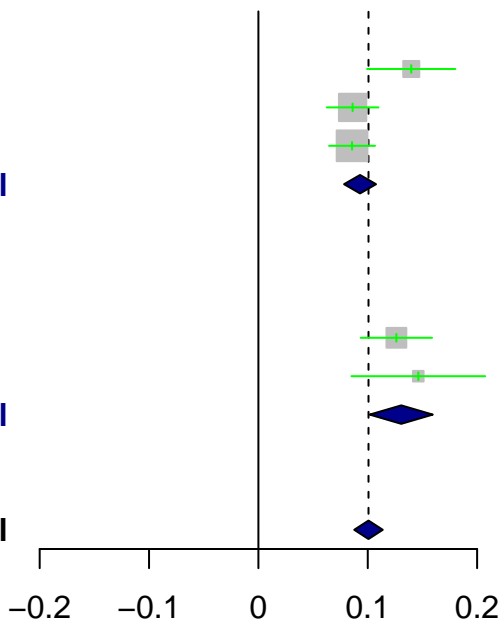

0.14 [0.10; 0.18]

0.09 [0.06; 0.11]

0.09 [0.06; 0.11]

**0.09 [0.08; 0.11] 1.56e-35**

0.13 [0.09; 0.16]

0.15 [0.09; 0.21]

**0.13 [0.10; 0.16] 6.20e-19**

**0.10 [0.09; 0.11] 1.12e-51**

rs7544531 (T)

BETA

BETA

95%-CI

P-value

**Discovery**

UKBB

FinnGen

23andMe

**Fixed effects model**

not applicable

**Replication**

IHGC16noFIno23

HUNT

**Fixed effects model**

$I^2 = 13\%$

**Fixed effects model**

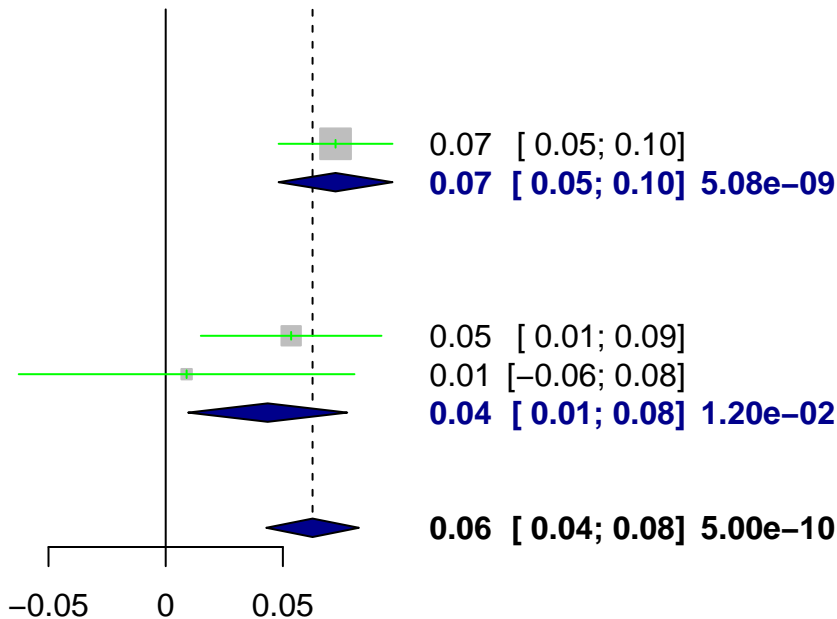

rs6693567 (C)

BETA

BETA

95%-CI

P-value

**Discovery**

UKBB

FinnGen

23andMe

**Fixed effects model**

$I^2 = 0\%$

**Replication**

IHGC16noFIno23

HUNT

**Fixed effects model**

$I^2 = 0\%$

**Fixed effects model**

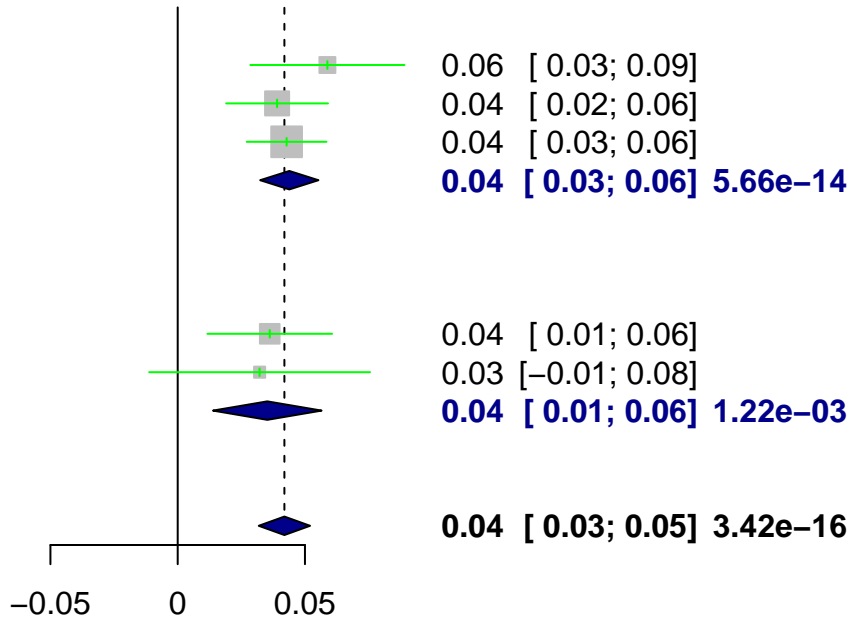

rs2282286 (G)

BETA

BETA

95%-CI

P-value

**Discovery**

UKBB

FinnGen

23andMe

**Fixed effects model**

$I^2 = 64\%$

**Replication**

IHGC16noFIno23

HUNT

**Fixed effects model**

$I^2 = 0\%$

**Fixed effects model**

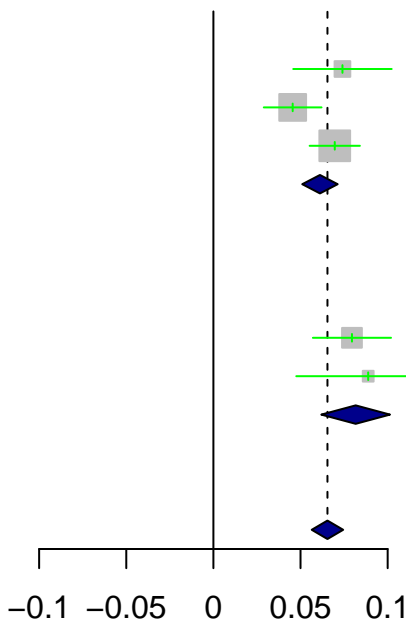

0.07 [0.05; 0.10]

0.05 [0.03; 0.06]

0.07 [0.06; 0.08]

**0.06 [0.05; 0.07] 4.32e-32**

0.08 [0.06; 0.10]

0.09 [0.05; 0.13]

**0.08 [0.06; 0.10] 4.75e-16**

**0.07 [0.06; 0.07] 8.37e-46**

rs141508023 (D)

BETA

BETA

95%-CI

P-value

**Discovery**

UKBB

FinnGen

23andMe

**Fixed effects model**

$r^2 = 24\%$

**Replication**

IHGC16noFIno23

HUNT

**Fixed effects model**

not applicable

**Fixed effects model**

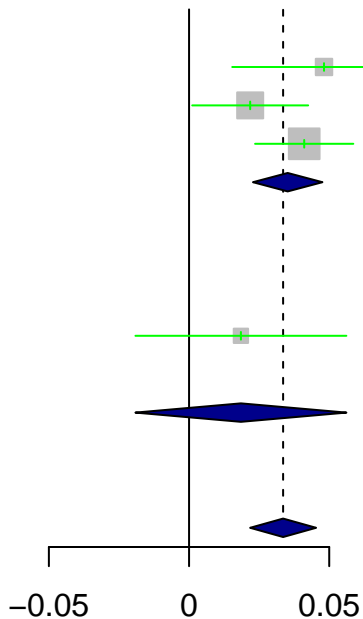

rs61830764 (A)

BETA

BETA

95%-CI

P-value

**Discovery**

UKBB

FinnGen

23andMe

**Fixed effects model**

$I^2 = 0\%$

**Replication**

IHGC16noFIno23

HUNT

**Fixed effects model**

$I^2 = 0\%$

**Fixed effects model**

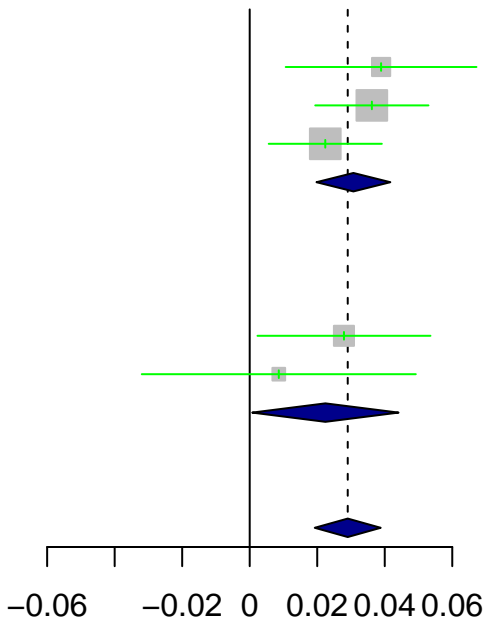

rs112706954 (G)

BETA

BETA

95%-CI

P-value

**Discovery**

UKBB

FinnGen

23andMe

**Fixed effects model**

$I^2 = 4\%$

**Replication**

IHGC16noFIno23

HUNT

**Fixed effects model**

$I^2 = 0\%$

**Fixed effects model**

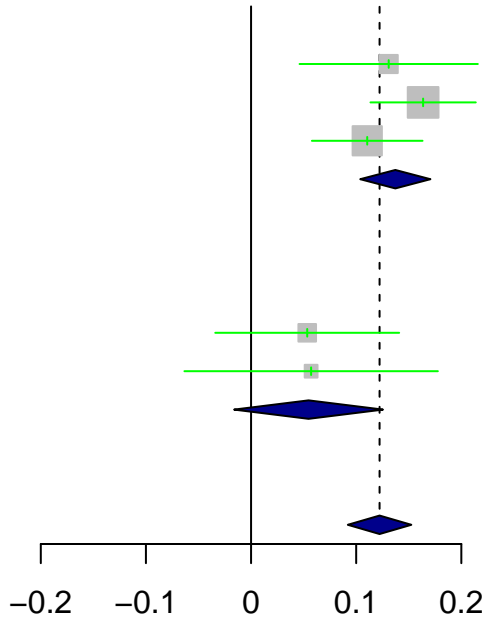

rs2312954 (T)

BETA

BETA

95%-CI

P-value

**Discovery**

UKBB

FinnGen

23andMe

**Fixed effects model**

$I^2 = 0\%$

**Replication**

IHGC16noFIno23

HUNT

**Fixed effects model**

$I^2 = 56\%$

**Fixed effects model**

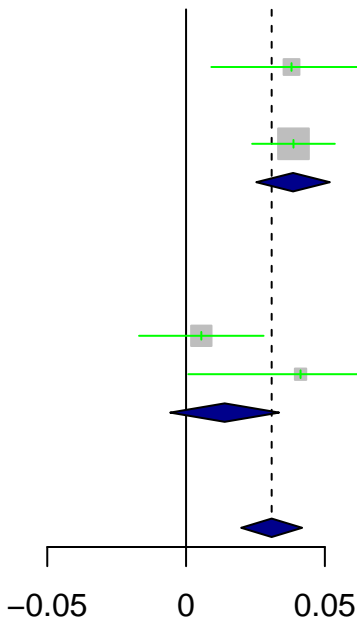

0.04 [0.01; 0.07]

0.04 [0.02; 0.05]

**0.04 [0.03; 0.05] 1.17e-08**

0.01 [-0.02; 0.03]

0.04 [0.00; 0.08]

**0.01 [-0.01; 0.03] 1.65e-01**

**0.03 [0.02; 0.04] 3.61e-08**



rs2305142 (G)

BETA

BETA

95%-CI

P-value

**Discovery**

UKBB

FinnGen

23andMe

**Fixed effects model**

$I^2 = 0\%$

**Replication**

IHGC16noFIno23

HUNT

**Fixed effects model**

$I^2 = 0\%$

**Fixed effects model**

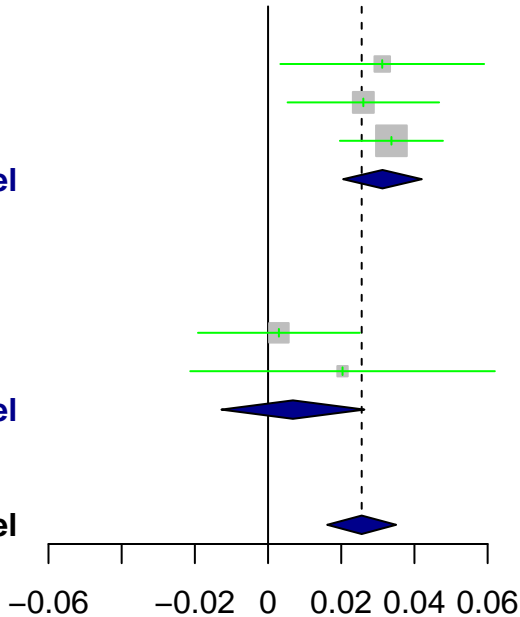

rs4556923 (T)

BETA

BETA

95%-CI

P-value

**Discovery**

UKBB

FinnGen

23andMe

**Fixed effects model**

$I^2 = 77\%$

**Replication**

IHGC16noFlno23

HUNT

**Fixed effects model**

$I^2 = 0\%$

**Fixed effects model**

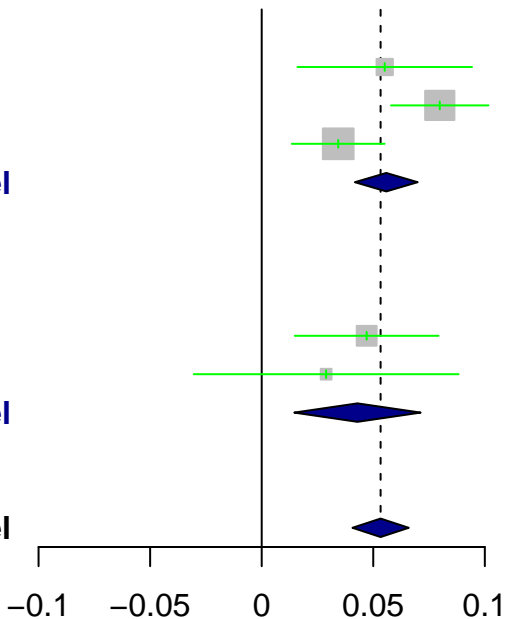

0.06 [ 0.02; 0.09]

0.08 [ 0.06; 0.10]

0.03 [ 0.01; 0.06]

**0.06 [ 0.04; 0.07] 7.08e-15**

0.05 [ 0.01; 0.08]

0.03 [-0.03; 0.09]

**0.04 [ 0.01; 0.07] 2.96e-03**

**0.05 [ 0.04; 0.07] 1.06e-16**

rs13400519 (A)

BETA

BETA

95%-CI

P-value

**Discovery**

UKBB

FinnGen

23andMe

**Fixed effects model**

$I^2 = 50\%$

**Replication**

IHGC16noFIno23

HUNT

**Fixed effects model**

$I^2 = 0\%$

**Fixed effects model**

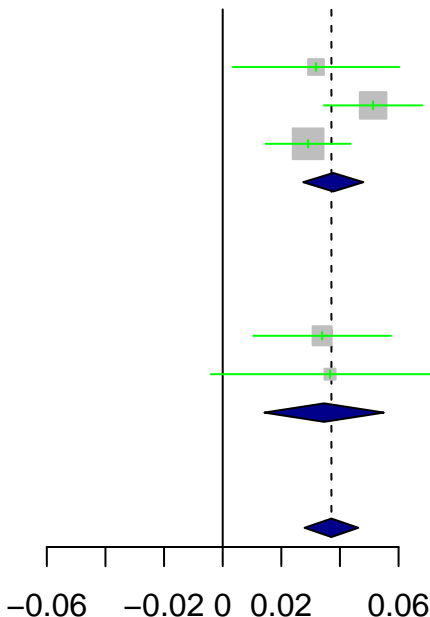

rs74482068 (D)

BETA

BETA

95%-CI

P-value

**Discovery**

UKBB

FinnGen

23andMe

**Fixed effects model**

$I^2 = 0\%$

**Replication**

IHGC16noFIno23

HUNT

**Fixed effects model**

$I^2 = 0\%$

**Fixed effects model**

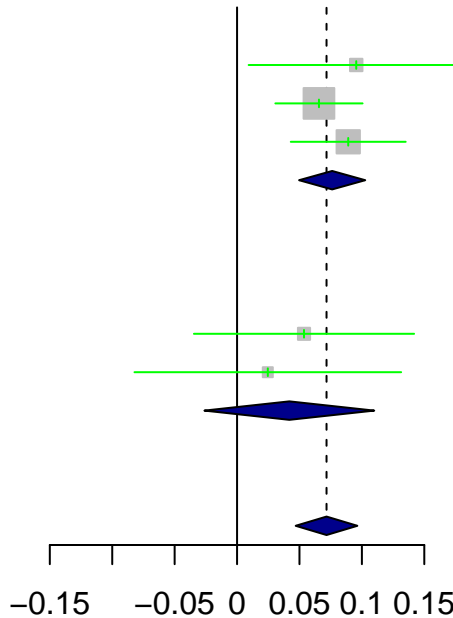

0.10 [ 0.01; 0.18]

0.07 [ 0.03; 0.10]

0.09 [ 0.04; 0.14]

**0.08 [ 0.05; 0.10] 1.76e-08**

0.05 [-0.03; 0.14]

0.02 [-0.08; 0.13]

**0.04 [-0.03; 0.11] 2.27e-01**

**0.07 [ 0.05; 0.10] 1.26e-08**

rs4668251 (G)

BETA

BETA

95%-CI

P-value

**Discovery**

UKBB

FinnGen

23andMe

**Fixed effects model**

$I^2 = 67\%$

**Replication**

IHGC16noFIno23

HUNT

**Fixed effects model**

$I^2 = 0\%$

**Fixed effects model**

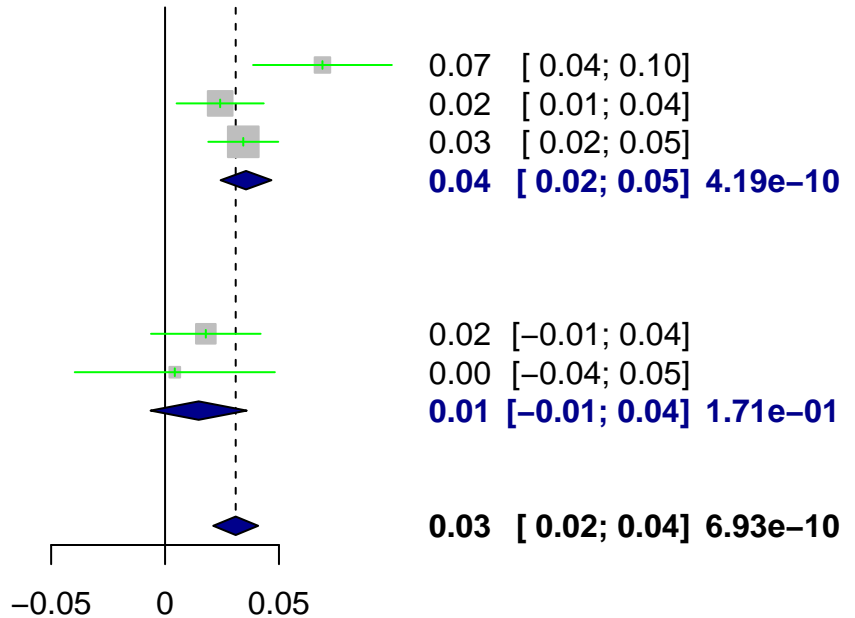

rs149163995 (C)

BETA

BETA

95%-CI

P-value

**Discovery**

UKBB

FinnGen

23andMe

**Fixed effects model**

$r^2 = 64\%$

**Replication**

IHGC16noFIno23

HUNT

**Fixed effects model**

not applicable

**Fixed effects model**

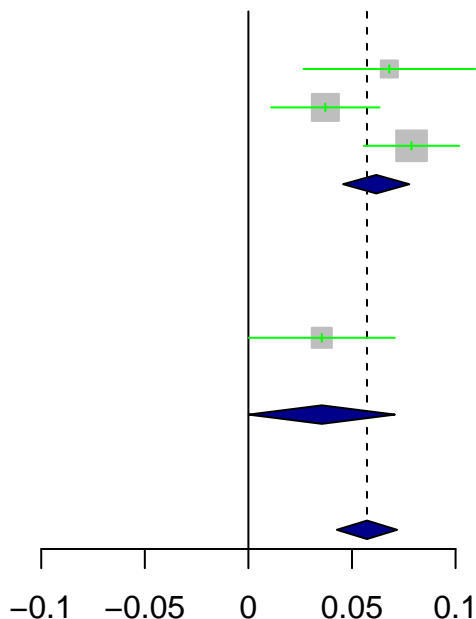

rs10187654 (C)

BETA

BETA

95%-CI

P-value

**Discovery**

UKBB

0.12 [0.08; 0.16]

FinnGen

0.09 [0.07; 0.12]

23andMe

0.09 [0.07; 0.10]

**Fixed effects model**

$I^2 = 28\%$

**0.09 [0.08; 0.11] 2.71e-44**

**Replication**

IHGC16noFIno23

0.11 [0.08; 0.13]

HUNT

0.12 [0.07; 0.17]

**Fixed effects model**

$I^2 = 0\%$

**0.11 [0.09; 0.13] 2.04e-19**

**Fixed effects model**

**0.10 [0.09; 0.11] 9.84e-62**

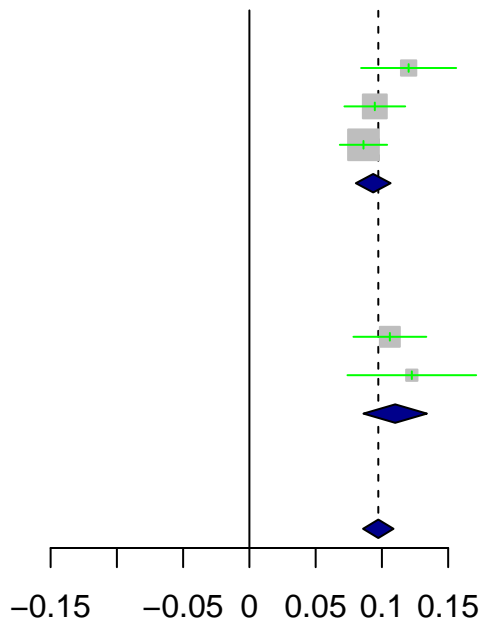

rs11386839 (D)

BETA

BETA

95%-CI

P-value

**Discovery**

UKBB

FinnGen

23andMe

**Fixed effects model**

$I^2 = 0\%$

**Replication**

IHGC16noFIno23

HUNT

**Fixed effects model**

$I^2 = 0\%$

**Fixed effects model**

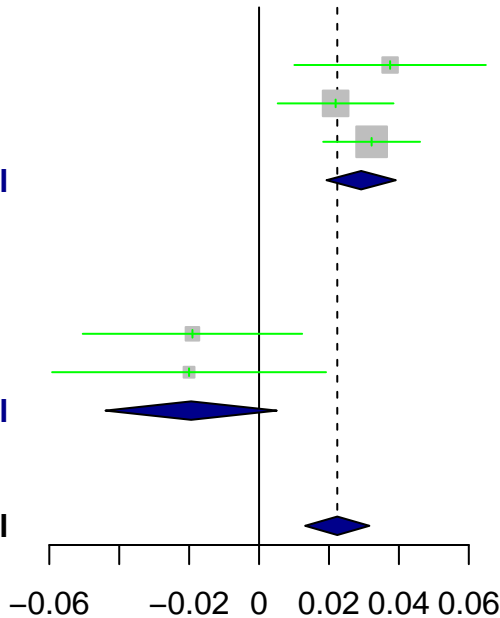



rs4075749 (G)

BETA

BETA

95%-CI

P-value

**Discovery**

UKBB

FinnGen

23andMe

**Fixed effects model**

$I^2 = 0\%$

**Replication**

IHGC16noFIno23

HUNT

**Fixed effects model**

$I^2 = 0\%$

**Fixed effects model**

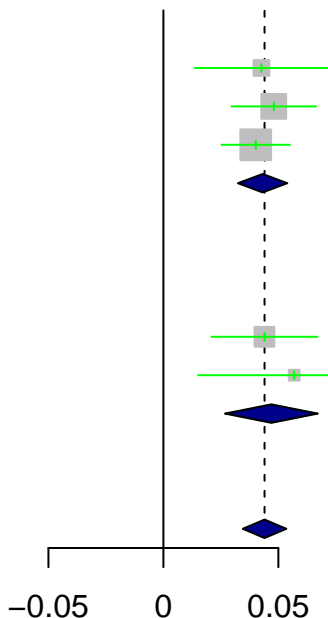

0.04 [0.01; 0.07]

0.05 [0.03; 0.07]

0.04 [0.03; 0.05]

**0.04 [0.03; 0.05] 3.29e-15**

0.04 [0.02; 0.07]

0.06 [0.02; 0.10]

**0.05 [0.03; 0.07] 5.01e-06**

**0.04 [0.03; 0.05] 8.60e-20**

rs6805804 (G)

BETA

BETA

95%-CI

P-value

**Discovery**

UKBB

FinnGen

23andMe

**Fixed effects model**

$I^2 = 0\%$

**Replication**

IHGC16noFIno23

HUNT

**Fixed effects model**

$I^2 = 0\%$

**Fixed effects model**

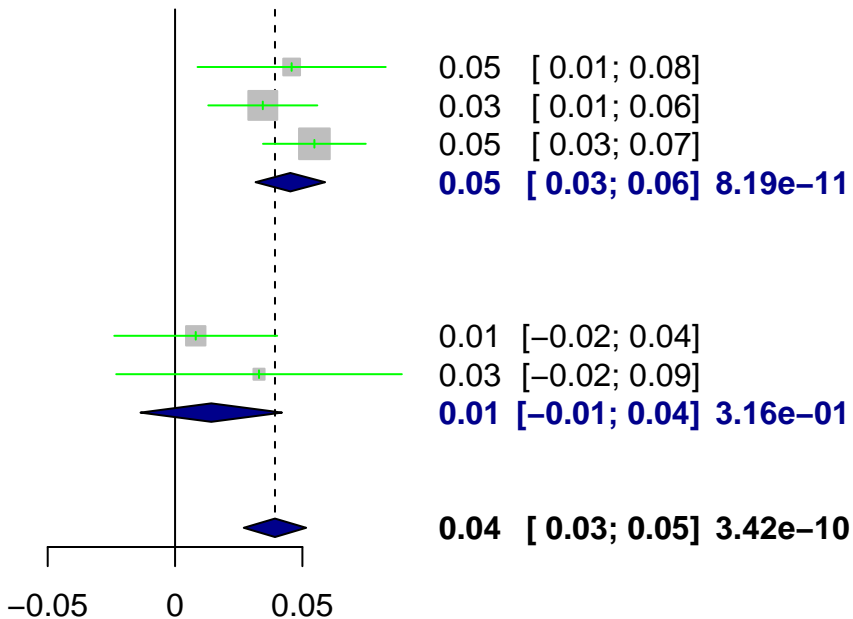

rs9861248 (G)

BETA

BETA

95%-CI

P-value

**Discovery**

UKBB

FinnGen

23andMe

**Fixed effects model**

$I^2 = 16\%$

**Replication**

IHGC16noFlno23

HUNT

**Fixed effects model**

$I^2 = 0\%$

**Fixed effects model**

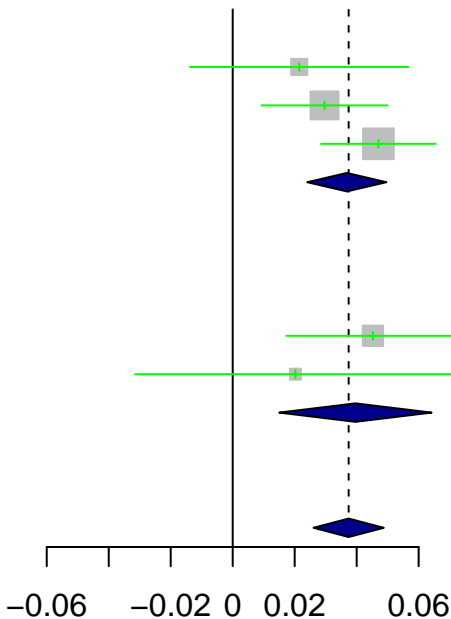

rs13078967 (A)

BETA

BETA

95%-CI

P-value

**Discovery**

UKBB

FinnGen

23andMe

**Fixed effects model**

$I^2 = 56\%$

**Replication**

IHGC16noFIno23

HUNT

**Fixed effects model**

$I^2 = 0\%$

**Fixed effects model**

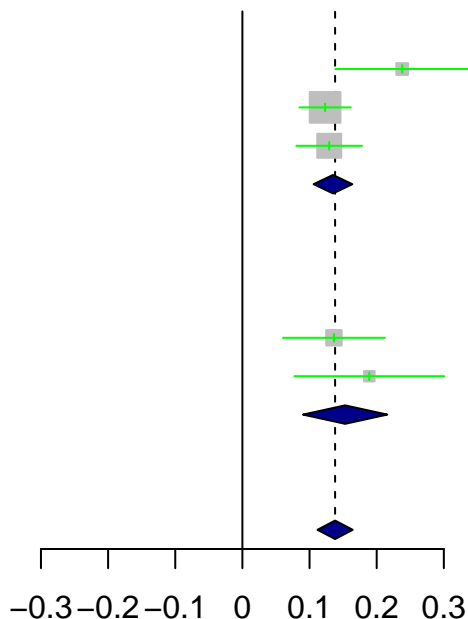

rs10026792 (G)

BETA

BETA

95%-CI

P-value

**Discovery**

UKBB

FinnGen

23andMe

**Fixed effects model**

$I^2 = 32\%$

**Replication**

IHGC16noFIno23

HUNT

**Fixed effects model**

$I^2 = 51\%$

**Fixed effects model**

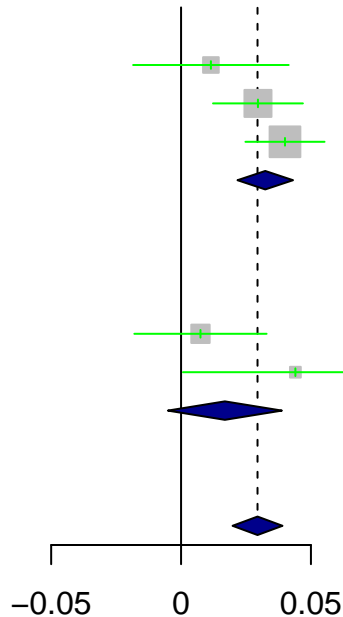

0.01 [-0.02; 0.04]

0.03 [ 0.01; 0.05]

0.04 [ 0.02; 0.06]

**0.03 [ 0.02; 0.04] 2.79e-09**

0.01 [-0.02; 0.03]

0.04 [ 0.00; 0.09]

**0.02 [-0.01; 0.04] 1.32e-01**

**0.03 [ 0.02; 0.04] 1.88e-09**

rs6817235 (G)

BETA

BETA

95%-CI

P-value

**Discovery**

UKBB

FinnGen

23andMe

**Fixed effects model**

$I^2 = 0\%$

**Replication**

IHGC16noFIno23

HUNT

**Fixed effects model**

$I^2 = 0\%$

**Fixed effects model**

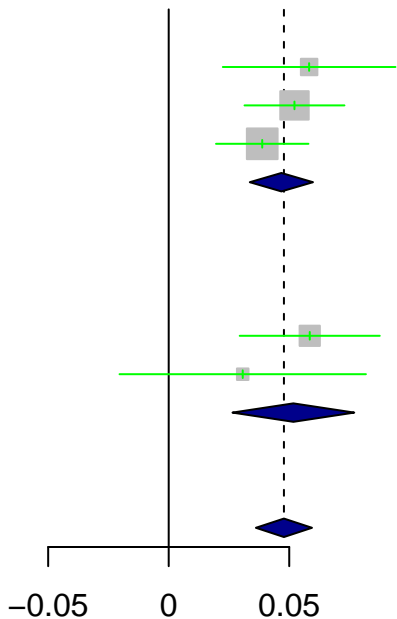

0.06 [ 0.02; 0.09]

0.05 [ 0.03; 0.07]

0.04 [ 0.02; 0.06]

**0.05 [ 0.03; 0.06] 2.81e-12**

0.06 [ 0.03; 0.09]

0.03 [-0.02; 0.08]

**0.05 [ 0.03; 0.08] 5.99e-05**

**0.05 [ 0.04; 0.06] 7.96e-16**

-0.05 0 0.05

rs802920 (T)

BETA

BETA

95%-CI

P-value

**Discovery**

UKBB

0.05 [0.01; 0.10]

FinnGen

0.06 [0.03; 0.09]

23andMe

0.05 [0.03; 0.08]

**Fixed effects model**

$I^2 = 0\%$

**0.06 [0.04; 0.07] 1.69e-10**

**Replication**

IHGC16noFIno23

0.04 [0.00; 0.08]

HUNT

0.09 [0.02; 0.15]

**Fixed effects model**

$I^2 = 22\%$

**0.05 [0.02; 0.08] 1.96e-03**

**Fixed effects model**

**0.06 [0.04; 0.07] 1.27e-12**

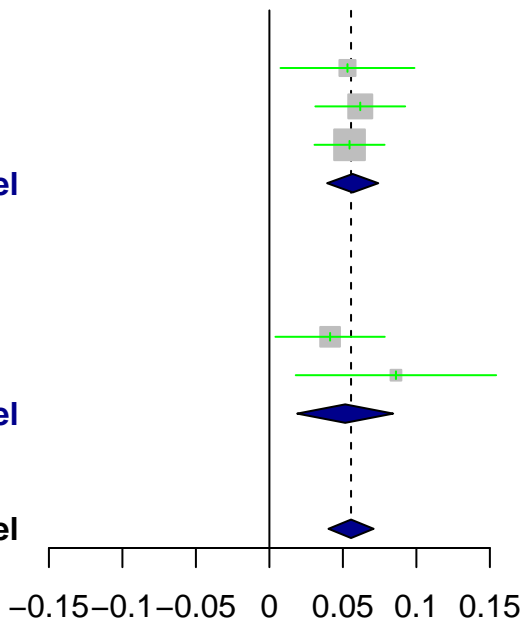

rs147908403 (C)

BETA

BETA

95%-CI

P-value

**Discovery**

UKBB

FinnGen

23andMe

**Fixed effects model**

$I^2 = 41\%$

**Replication**

IHGC16noFIno23

HUNT

**Fixed effects model**

$I^2 = 0\%$

**Fixed effects model**

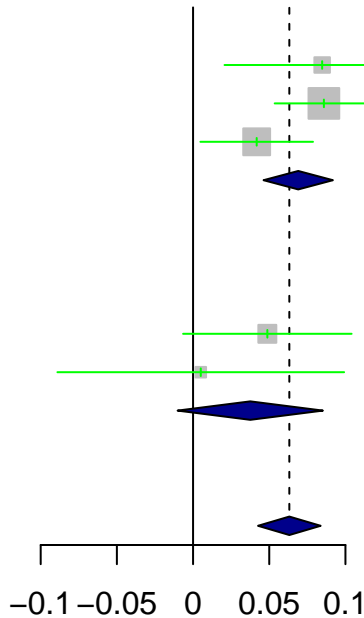

0.08 [0.02; 0.15]

0.09 [0.05; 0.12]

0.04 [0.00; 0.08]

**0.07 [0.05; 0.09] 2.80e-09**

0.05 [-0.01; 0.10]

0.01 [-0.09; 0.10]

**0.04 [-0.01; 0.09] 1.23e-01**

**0.06 [0.04; 0.08] 1.62e-09**



rs4865540 (C)

BETA

BETA

95%-CI

P-value

**Discovery**

UKBB

FinnGen

23andMe

**Fixed effects model**

$I^2 = 25\%$

**Replication**

IHGC16noFIno23

HUNT

**Fixed effects model**

$I^2 = 0\%$

**Fixed effects model**

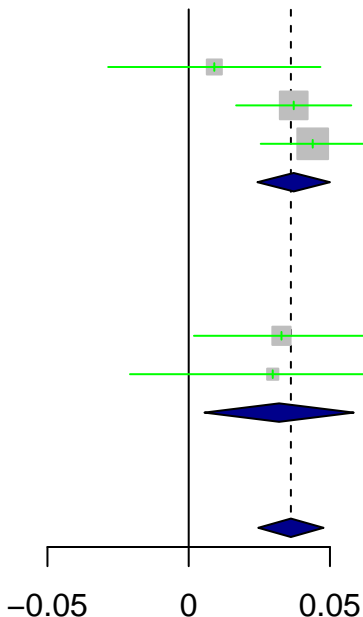

0.01 [-0.03; 0.05]

0.04 [0.02; 0.06]

0.04 [0.03; 0.06]

**0.04 [0.02; 0.05] 1.41e-08**

0.03 [0.00; 0.06]

0.03 [-0.02; 0.08]

**0.03 [0.01; 0.06] 1.76e-02**

**0.04 [0.02; 0.05] 8.06e-10**

rs1433195406 (D)

BETA

BETA

95%-CI

P-value

**Discovery**

UKBB

FinnGen

23andMe

**Fixed effects model**

$I^2 = 0\%$

**Replication**

IHGC16noFIno23

HUNT

**Fixed effects model**

$I^2 = 0\%$

**Fixed effects model**

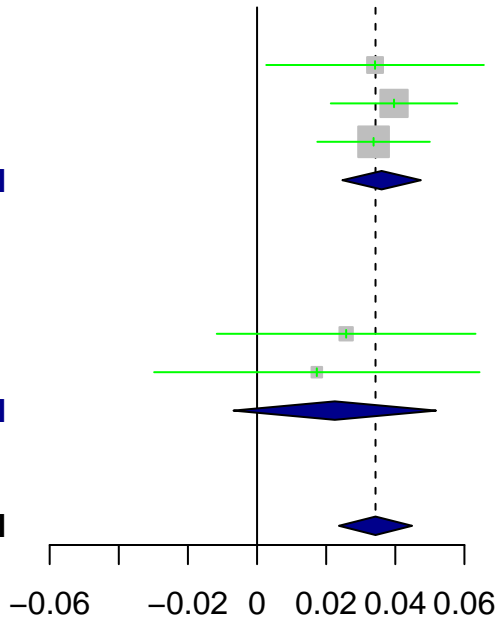

0.03 [ 0.00; 0.07]

0.04 [ 0.02; 0.06]

0.03 [ 0.02; 0.05]

**0.04 [ 0.02; 0.05] 4.86e-10**

0.03 [ -0.01; 0.06]

0.02 [ -0.03; 0.06]

**0.02 [ -0.01; 0.05] 1.32e-01**

**0.03 [ 0.02; 0.04] 2.13e-10**

rs10076315 (T)

BETA

BETA

95%-CI

P-value

**Discovery**

UKBB

FinnGen

23andMe

**Fixed effects model**

$I^2 = 0\%$

**Replication**

IHGC16noFIno23

HUNT

**Fixed effects model**

$I^2 = 0\%$

**Fixed effects model**

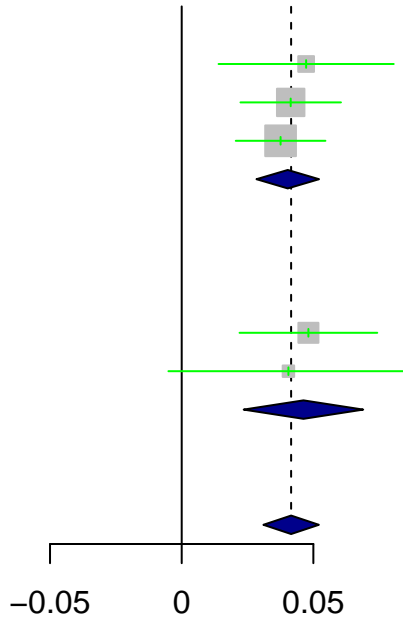

rs3733672 (A)

BETA

BETA

95%-CI

P-value

**Discovery**

UKBB

FinnGen

23andMe

**Fixed effects model**

$I^2 = 79\%$

**Replication**

IHGC16noFIno23

HUNT

**Fixed effects model**

$I^2 = 0\%$

**Fixed effects model**

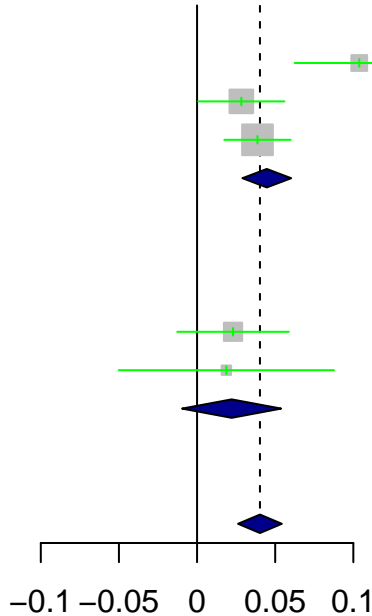

0.10 [0.06; 0.15]

0.03 [0.00; 0.06]

0.04 [0.02; 0.06]

**0.04 [0.03; 0.06] 2.06e-08**

0.02 [-0.01; 0.06]

0.02 [-0.05; 0.09]

**0.02 [-0.01; 0.05] 1.72e-01**

**0.04 [0.03; 0.05] 1.71e-08**

rs372257780 (I)

BETA

BETA

95%-CI

P-value

**Discovery**

UKBB

FinnGen

23andMe

**Fixed effects model**

$I^2 = 0\%$

**Replication**

IHGC16noFIno23

HUNT

**Fixed effects model**

not applicable

**Fixed effects model**

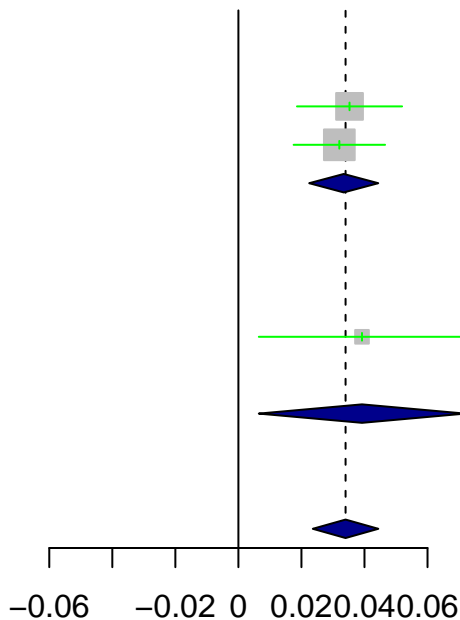

rs78151838 (A)

BETA

BETA

95%-CI

P-value

**Discovery**

UKBB

FinnGen

23andMe

**Fixed effects model**

$I^2 = 0\%$

**Replication**

IHGC16noFIno23

HUNT

**Fixed effects model**

$I^2 = 0\%$

**Fixed effects model**

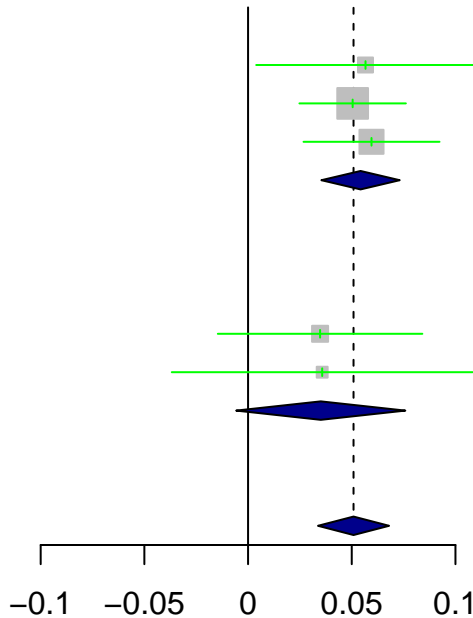

0.06 [0.00; 0.11]

0.05 [0.02; 0.08]

0.06 [0.03; 0.09]

**0.05 [0.04; 0.07] 1.82e-08**

0.03 [-0.01; 0.08]

0.04 [-0.04; 0.11]

**0.04 [-0.01; 0.08] 9.21e-02**

**0.05 [0.03; 0.07] 5.91e-09**

rs11955537 (A)

BETA

BETA

95%-CI

P-value

**Discovery**

UKBB

FinnGen

23andMe

**Fixed effects model**

$I^2 = 0\%$

**Replication**

IHGC16noFIno23

HUNT

**Fixed effects model**

$I^2 = 0\%$

**Fixed effects model**

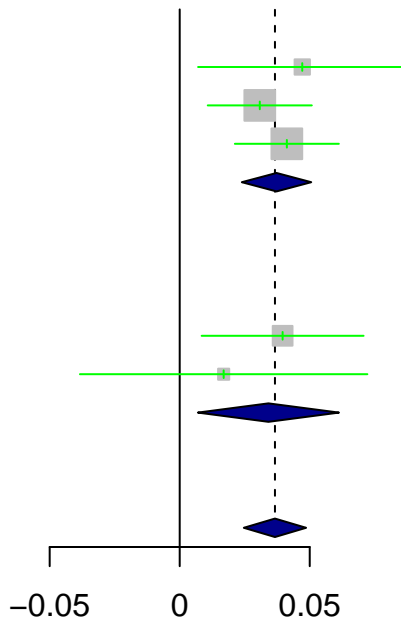

0.05 [ 0.01; 0.09]

0.03 [ 0.01; 0.05]

0.04 [ 0.02; 0.06]

**0.04 [ 0.02; 0.05] 4.55e-08**

0.04 [ 0.01; 0.07]

0.02 [-0.04; 0.07]

**0.03 [ 0.01; 0.06] 1.37e-02**

**0.04 [ 0.02; 0.05] 2.00e-09**

rs10794701 (A)

BETA

BETA

95%-CI

P-value

**Discovery**

UKBB

FinnGen

23andMe

**Fixed effects model**

$I^2 = 0\%$

**Replication**

IHGC16noFIno23

HUNT

**Fixed effects model**

$I^2 = 0\%$

**Fixed effects model**

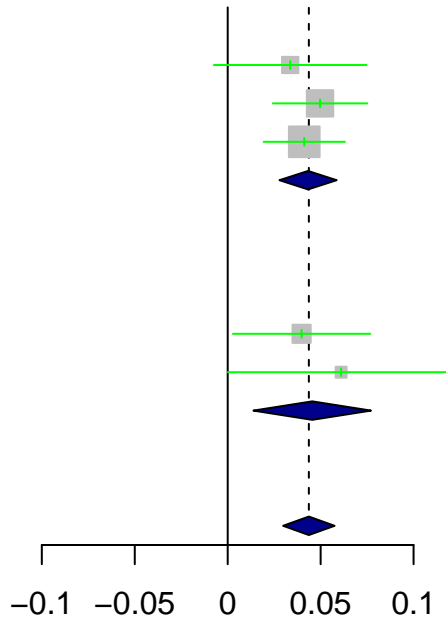

0.03 [-0.01; 0.07]

0.05 [0.02; 0.08]

0.04 [0.02; 0.06]

**0.04 [0.03; 0.06] 3.57e-08**

0.04 [0.00; 0.08]

0.06 [0.00; 0.12]

**0.05 [0.01; 0.08] 4.80e-03**

**0.04 [0.03; 0.06] 5.91e-10**



rs9349379 (A)

BETA

BETA

95%-CI

P-value

**Discovery**

UKBB

FinnGen

23andMe

**Fixed effects model**

$I^2 = 68\%$

**Replication**

IHGC16noFIno23

HUNT

**Fixed effects model**

$I^2 = 0\%$

**Fixed effects model**

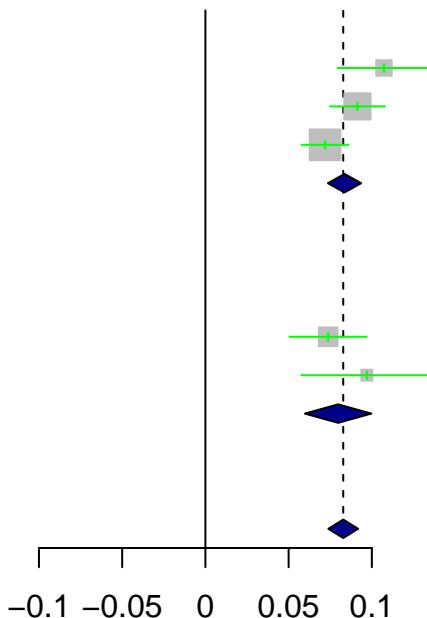

rs9295536 (C)

BETA

BETA

95%-CI

P-value

**Discovery**

UKBB

FinnGen

23andMe

**Fixed effects model**

$I^2 = 68\%$

**Replication**

IHGC16noFIno23

HUNT

**Fixed effects model**

$I^2 = 0\%$

**Fixed effects model**

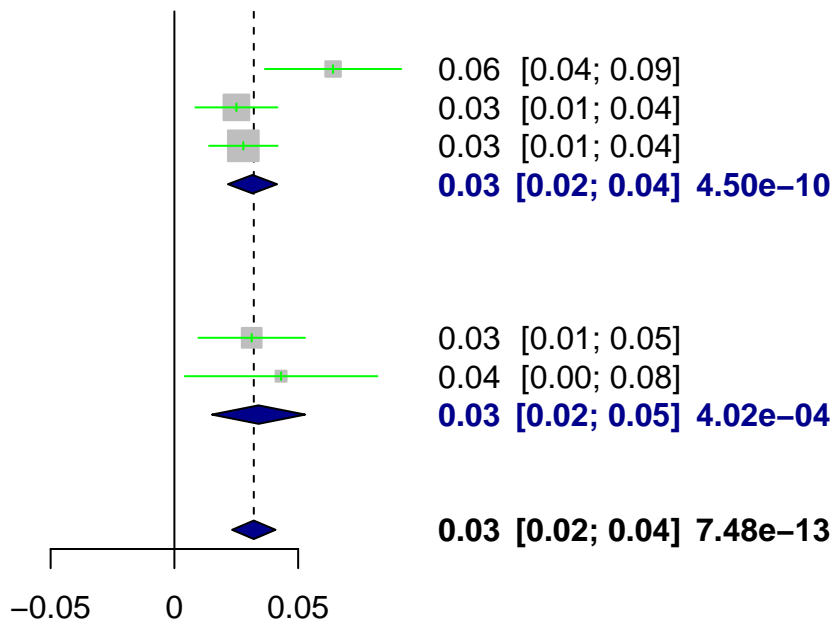

rs13213720 (T)

BETA

BETA

95%-CI

P-value

**Discovery**

UKBB

FinnGen

23andMe

**Fixed effects model**

$r^2 = 31\%$

**Replication**

IHGC16noFIno23

HUNT

**Fixed effects model**

not applicable

**Fixed effects model**

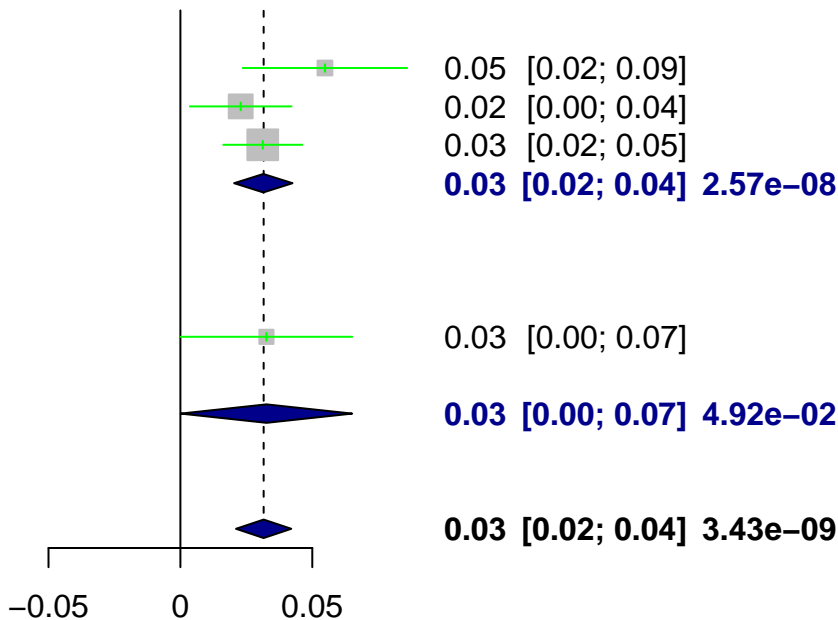

rs41267082 (A)

BETA

BETA

95%-CI

P-value

**Discovery**

UKBB

FinnGen

23andMe

**Fixed effects model**

$I^2 = 42\%$

**Replication**

IHGC16noFIno23

HUNT

**Fixed effects model**

not applicable

**Fixed effects model**

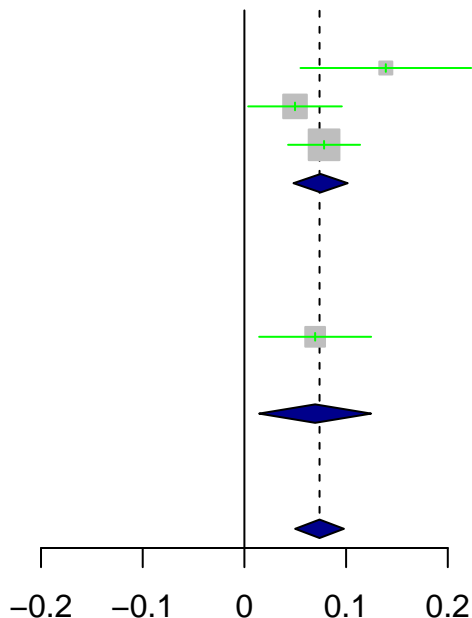

0.14

[0.06; 0.22]

0.05

[0.00; 0.10]

0.08

[0.04; 0.11]

**0.07**

**[0.05; 0.10]**

**3.55e-08**

0.07

[0.01; 0.12]

**0.07**

**[0.01; 0.12]**

**1.33e-02**

**0.07**

**[0.05; 0.10]**

**1.51e-09**

rs10456100 (T)

BETA

BETA

95%-CI

P-value

**Discovery**

UKBB

FinnGen

23andMe

**Fixed effects model**

$I^2 = 0\%$

**Replication**

IHGC16noFIno23

HUNT

**Fixed effects model**

$I^2 = 0\%$

**Fixed effects model**

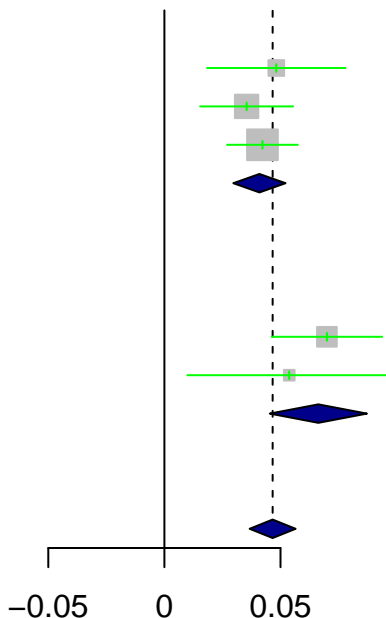

0.05 [0.02; 0.08]

0.04 [0.02; 0.06]

0.04 [0.03; 0.06]

**0.04 [0.03; 0.05] 9.65e-13**

0.07 [0.05; 0.09]

0.05 [0.01; 0.10]

**0.07 [0.05; 0.09] 5.17e-10**

**0.05 [0.04; 0.06] 2.68e-20**

rs829470 (C)

BETA

BETA

95%-CI

P-value

**Discovery**

UKBB

FinnGen

23andMe

**Fixed effects model**

$r^2 = 46\%$

**Replication**

IHGC16noFIno23

HUNT

**Fixed effects model**

$r^2 = 0\%$

**Fixed effects model**

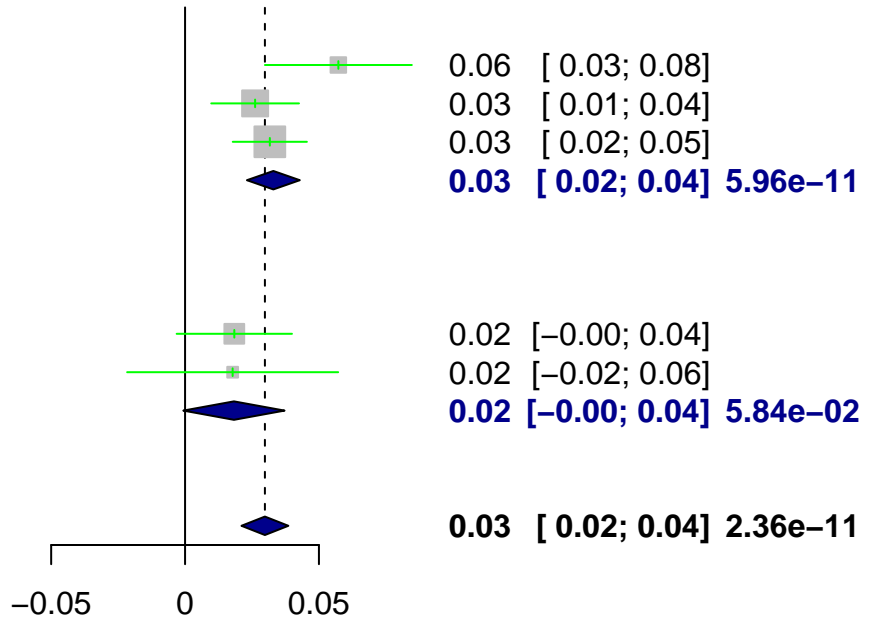

rs9486715 (C)

BETA

BETA

95%-CI

P-value

**Discovery**

UKBB

FinnGen

23andMe

**Fixed effects model**

$I^2 = 77\%$

**Replication**

IHGC16noFIno23

HUNT

**Fixed effects model**

$I^2 = 11\%$

**Fixed effects model**

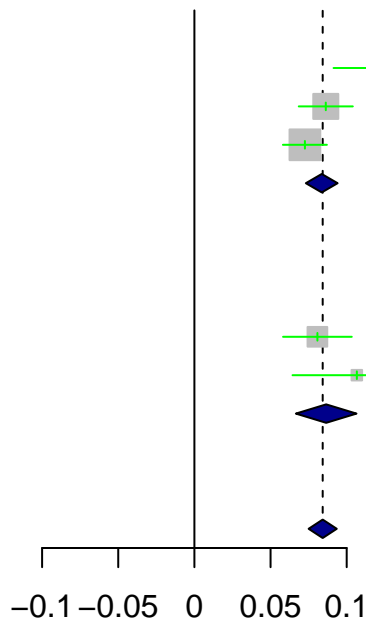

0.12

[0.09; 0.15]

0.09

[0.07; 0.10]

0.07

[0.06; 0.09]

**0.08**

**[0.07; 0.09]**

**1.44e-55**

0.08

[0.06; 0.10]

0.11

[0.06; 0.15]

**0.09**

**[0.07; 0.11]**

**1.58e-17**

**0.08**

**[0.07; 0.09]**

**2.01e-71**

rs6915476 (T)

BETA

BETA

95%-CI

P-value

**Discovery**

UKBB

FinnGen

23andMe

**Fixed effects model**

$I^2 = 79\%$

**Replication**

IHGC16noFIno23

HUNT

**Fixed effects model**

$I^2 = 34\%$

**Fixed effects model**

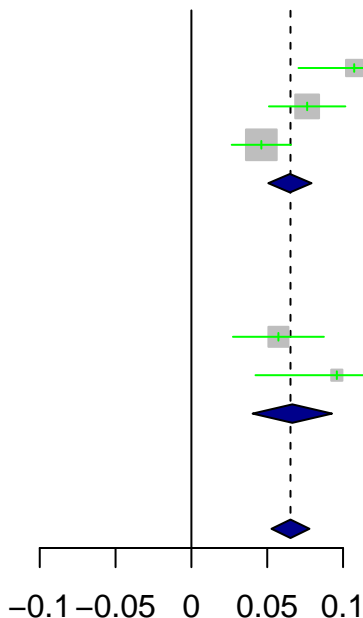

0.11

[0.07; 0.14]

0.08

[0.05; 0.10]

0.05

[0.03; 0.07]

**0.06**

**[0.05; 0.08]**

**4.05e-19**

0.06

[0.03; 0.09]

0.10

[0.04; 0.15]

**0.07**

**[0.04; 0.09]**

**6.26e-07**

**0.07**

**[0.05; 0.08]**

**1.36e-24**



rs58189451 (G)

BETA

BETA

95%-CI

P-value

**Discovery**

UKBB

FinnGen

23andMe

**Fixed effects model**

$I^2 = 0\%$

**Replication**

IHGC16noFIno23

HUNT

**Fixed effects model**

$I^2 = 0\%$

**Fixed effects model**

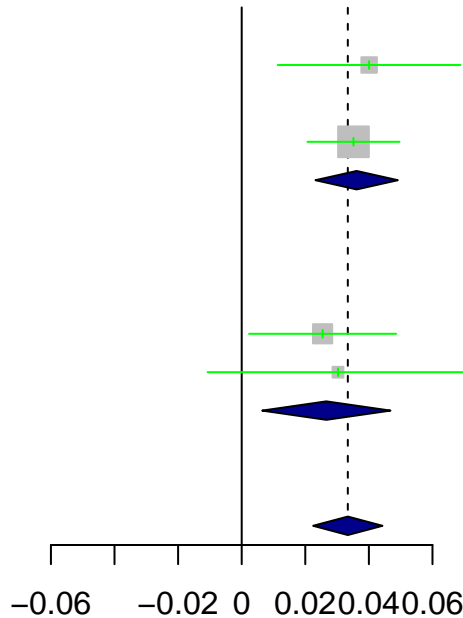

rs117303395 (A)

BETA

BETA

95%-CI

P-value

**Discovery**

UKBB

FinnGen

23andMe

**Fixed effects model**

$r^2 = 0\%$

**Replication**

IHGC16noFIno23

HUNT

**Fixed effects model**

$r^2 = 0\%$

**Fixed effects model**

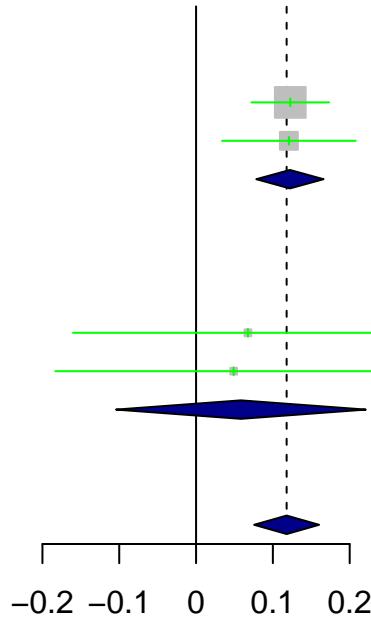

0.12 [0.07; 0.17]

0.12 [0.03; 0.21]

**0.12 [0.08; 0.17] 4.40e-08**

0.07 [-0.16; 0.30]

0.05 [-0.18; 0.28]

**0.06 [-0.10; 0.22] 4.81e-01**

**0.12 [0.08; 0.16] 4.42e-08**

rs10479762 (T)

BETA

BETA

95%-CI

P-value

**Discovery**

UKBB

FinnGen

23andMe

**Fixed effects model**

$I^2 = 84\%$

**Replication**

IHGC16noFIno23

HUNT

**Fixed effects model**

$I^2 = 0\%$

**Fixed effects model**

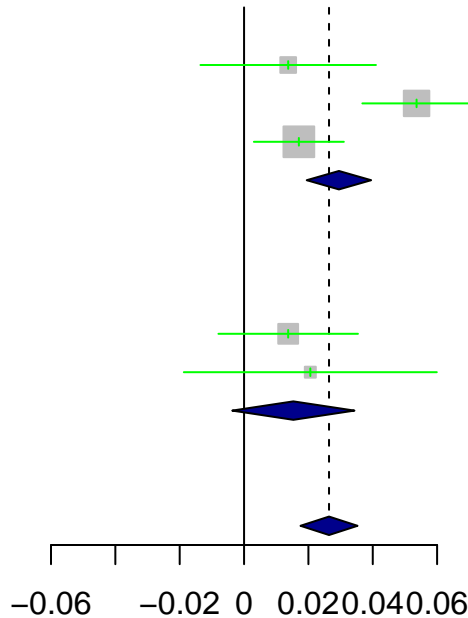

rs10234636 (T)

BETA

BETA

95%-CI

P-value

**Discovery**

UKBB

FinnGen

23andMe

**Fixed effects model**

$I^2 = 82\%$

**Replication**

IHGC16noFIno23

HUNT

**Fixed effects model**

$I^2 = 0\%$

**Fixed effects model**

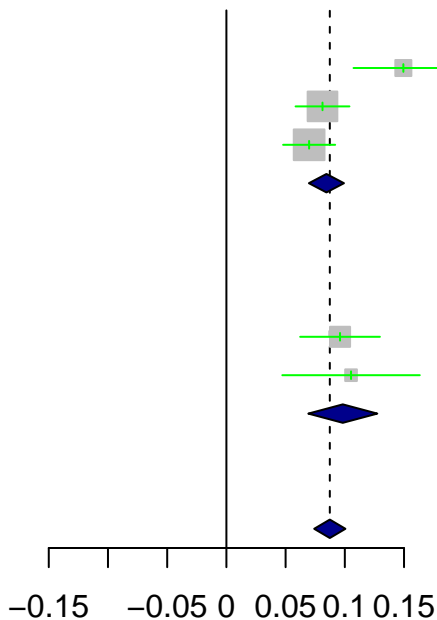

0.15 [0.11; 0.19]

0.08 [0.06; 0.10]

0.07 [0.05; 0.09]

**0.08 [0.07; 0.10] 5.14e-29**

0.10 [0.06; 0.13]

0.11 [0.05; 0.16]

**0.10 [0.07; 0.13] 3.73e-11**

**0.09 [0.07; 0.10] 1.83e-38**

rs67243124 (I)

BETA

BETA

95%-CI

P-value

**Discovery**

UKBB

FinnGen

23andMe

**Fixed effects model**

$I^2 = 43\%$

**Replication**

IHGC16noFIno23

HUNT

**Fixed effects model**

$I^2 = 77\%$

**Fixed effects model**

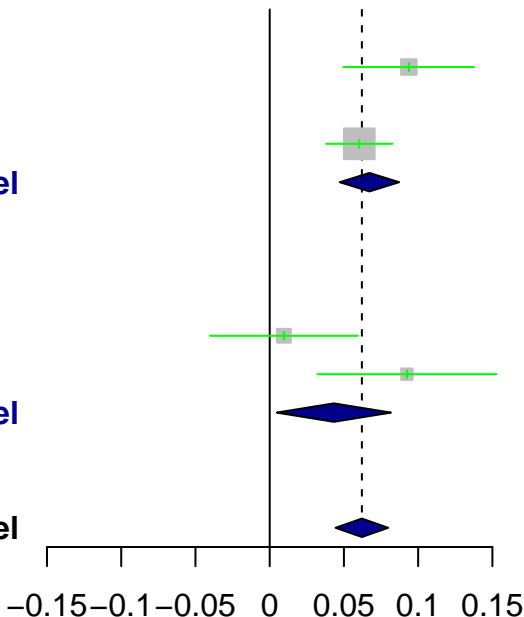

rs10966033 (G)

BETA

BETA

95%-CI

P-value

**Discovery**

UKBB

FinnGen

23andMe

**Fixed effects model**

$I^2 = 82\%$

**Replication**

IHGC16noFIno23

HUNT

**Fixed effects model**

$I^2 = 0\%$

**Fixed effects model**

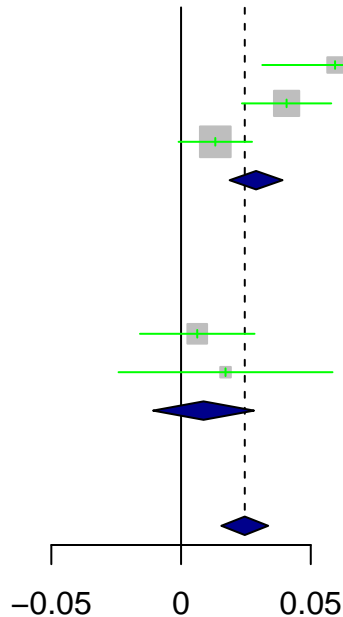

0.06 [ 0.03; 0.09]

0.04 [ 0.02; 0.06]

0.01 [-0.00; 0.03]

**0.03 [ 0.02; 0.04] 2.70e-08**

0.01 [-0.02; 0.03]

0.02 [-0.02; 0.06]

**0.01 [-0.01; 0.03] 3.83e-01**

**0.02 [ 0.02; 0.03] 9.57e-08**

rs1953010 (T)

BETA

BETA

95%-CI

P-value

**Discovery**

UKBB

FinnGen

23andMe

**Fixed effects model**

$I^2 = 0\%$

**Replication**

IHGC16noFIno23

HUNT

**Fixed effects model**

$I^2 = 0\%$

**Fixed effects model**

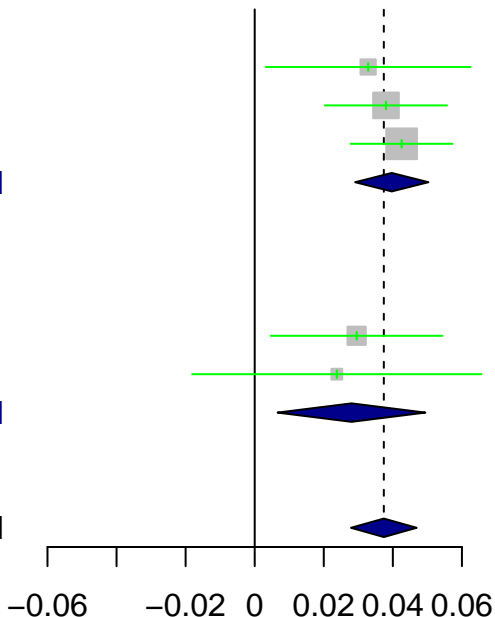

rs10973207 (T)

BETA

BETA

95%-CI

P-value

**Discovery**

UKBB

FinnGen

23andMe

**Fixed effects model**

$I^2 = 57\%$

**Replication**

IHGC16noFIno23

HUNT

**Fixed effects model**

$I^2 = 0\%$

**Fixed effects model**

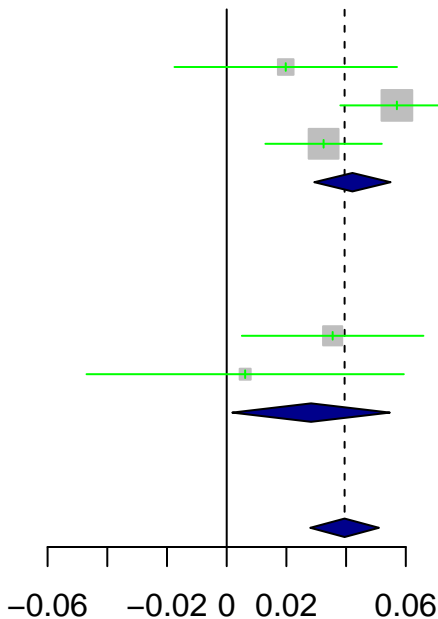

0.02 [-0.02; 0.06]

0.06 [0.04; 0.08]

0.03 [0.01; 0.05]

**0.04 [0.03; 0.05] 1.04e-10**

0.04 [0.01; 0.07]

0.01 [-0.05; 0.06]

**0.03 [0.00; 0.05] 3.58e-02**

**0.04 [0.03; 0.05] 1.65e-11**



rs7034179 (T)

BETA

BETA

95%-CI

P-value

**Discovery**

UKBB

FinnGen

23andMe

**Fixed effects model**

$I^2 = 40\%$

**Replication**

IHGC16noFIno23

HUNT

**Fixed effects model**

$I^2 = 80\%$

**Fixed effects model**

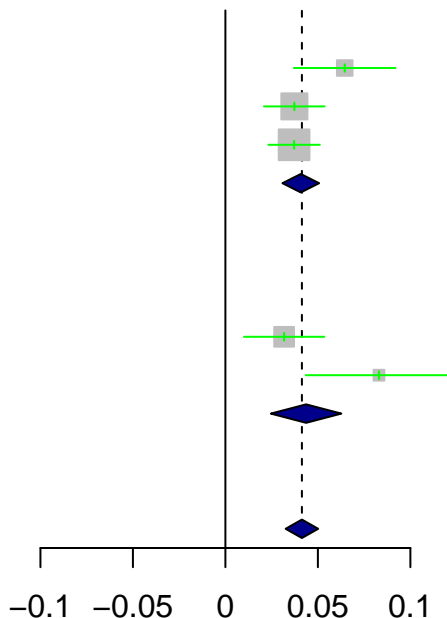

0.06 [0.04; 0.09]

0.04 [0.02; 0.05]

0.04 [0.02; 0.05]

**0.04 [0.03; 0.05] 7.86e-16**

0.03 [0.01; 0.05]

0.08 [0.04; 0.12]

**0.04 [0.02; 0.06] 7.23e-06**

**0.04 [0.03; 0.05] 2.89e-20**

rs56184018 (A)

BETA

BETA

95%-CI

P-value

**Discovery**

UKBB

FinnGen

23andMe

**Fixed effects model**

$I^2 = 0\%$

**Replication**

IHGC16noFIno23

HUNT

**Fixed effects model**

$I^2 = 0\%$

**Fixed effects model**

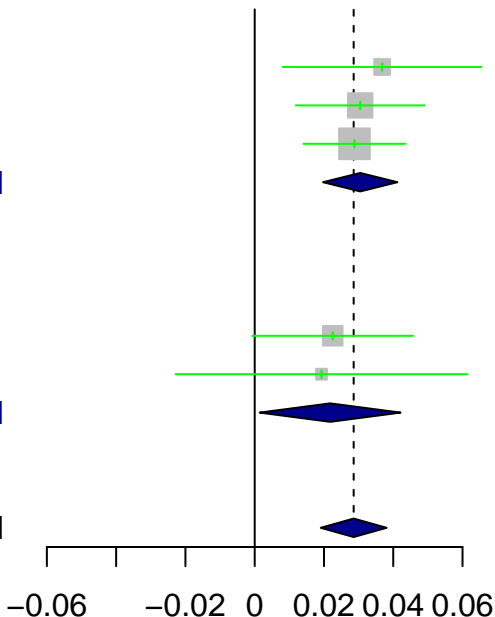

0.04 [ 0.01; 0.07]

0.03 [ 0.01; 0.05]

0.03 [ 0.01; 0.04]

**0.03 [ 0.02; 0.04] 2.64e-08**

0.02 [-0.00; 0.05]

0.02 [-0.02; 0.06]

**0.02 [ 0.00; 0.04] 3.58e-02**

**0.03 [ 0.02; 0.04] 3.54e-09**

rs10978672 (G)

BETA

BETA

95%-CI

P-value

**Discovery**

UKBB

FinnGen

23andMe

**Fixed effects model**

$I^2 = 0\%$

**Replication**

IHGC16noFIno23

HUNT

**Fixed effects model**

$I^2 = 5\%$

**Fixed effects model**

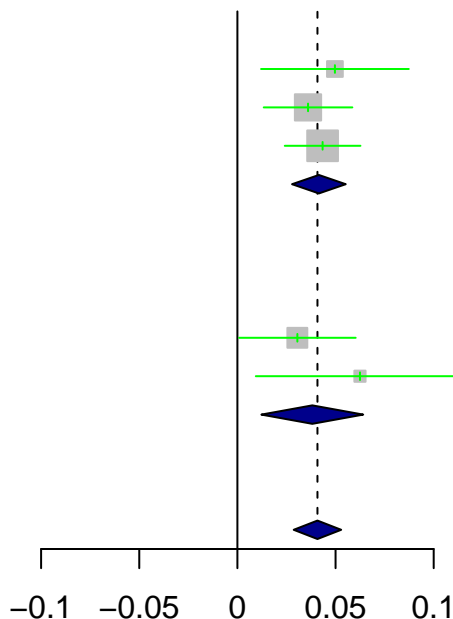

0.05 [0.01; 0.09]

0.04 [0.01; 0.06]

0.04 [0.02; 0.06]

**0.04 [0.03; 0.06] 2.68e-09**

0.03 [0.00; 0.06]

0.06 [0.01; 0.12]

**0.04 [0.01; 0.06] 3.92e-03**

**0.04 [0.03; 0.05] 3.77e-11**

rs7030607 (G)

BETA

BETA

95%-CI

P-value

**Discovery**

UKBB

FinnGen

23andMe

**Fixed effects model**

$I^2 = 39\%$

**Replication**

IHGC16noFlno23

HUNT

**Fixed effects model**

$I^2 = 0\%$

**Fixed effects model**

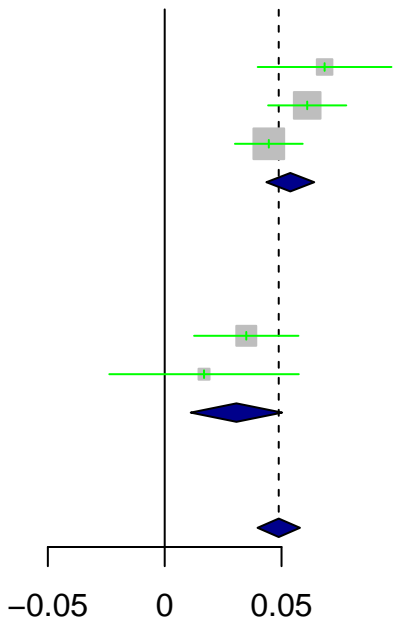

0.07 [0.04; 0.10]

0.06 [0.04; 0.08]

0.04 [0.03; 0.06]

**0.05 [0.04; 0.06] 7.75e-25**

0.03 [0.01; 0.06]

0.02 [-0.02; 0.06]

**0.03 [0.01; 0.05] 2.10e-03**

**0.05 [0.04; 0.06] 5.05e-26**

rs4358894 (C)

BETA

BETA

95%-CI

P-value

**Discovery**

UKBB

FinnGen

23andMe

**Fixed effects model**

$I^2 = 0\%$

**Replication**

IHGC16noFIno23

HUNT

**Fixed effects model**

$I^2 = 0\%$

**Fixed effects model**

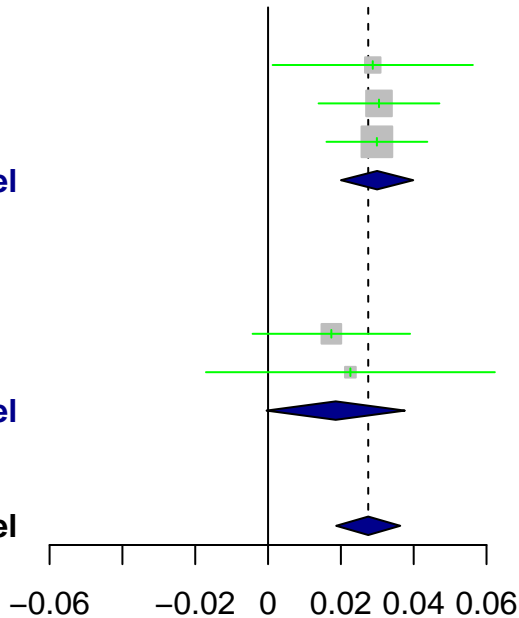

rs7916911 (T)

BETA

BETA

95%-CI

P-value

**Discovery**

UKBB

FinnGen

23andMe

**Fixed effects model**

$I^2 = 0\%$

**Replication**

IHGC16noFIno23

HUNT

**Fixed effects model**

$I^2 = 18\%$

**Fixed effects model**

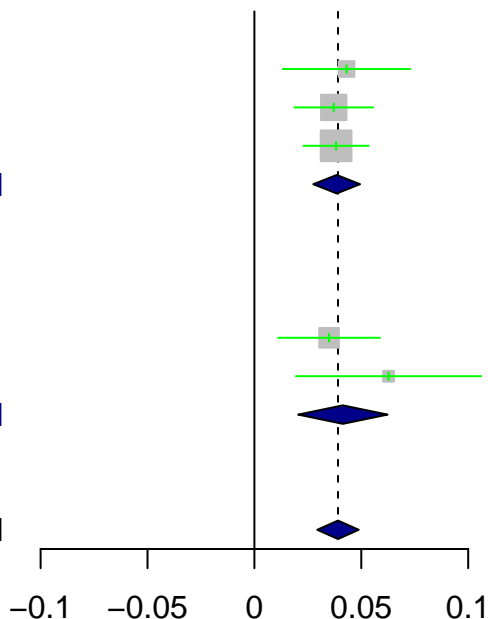

0.04

[0.01; 0.07]

0.04

[0.02; 0.06]

0.04

[0.02; 0.05]

**0.04**

**[0.03; 0.05]**

**5.34e-12**

0.03

[0.01; 0.06]

0.06

[0.02; 0.11]

**0.04**

**[0.02; 0.06]**

**1.02e-04**

**0.04**

**[0.03; 0.05]**

**2.45e-15**

rs12251016 (T)

BETA

BETA

95%-CI

P-value

**Discovery**

UKBB

FinnGen

23andMe

**Fixed effects model**

$I^2 = 0\%$

**Replication**

IHGC16noFIno23

HUNT

**Fixed effects model**

$I^2 = 48\%$

**Fixed effects model**

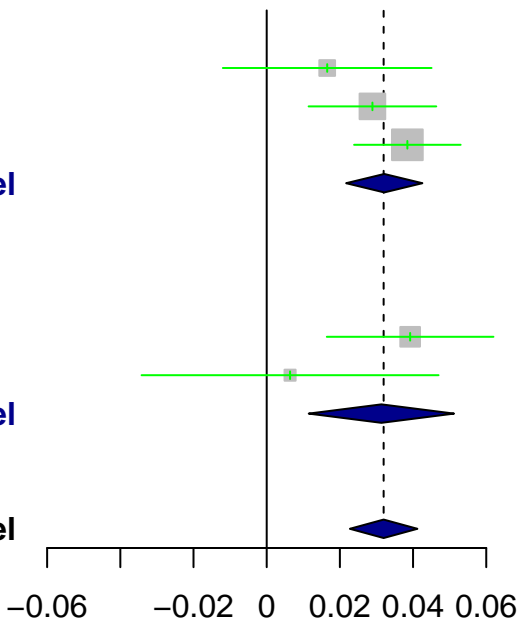

rs10826719 (G)

BETA

BETA

95%-CI

P-value

**Discovery**

UKBB

FinnGen

23andMe

**Fixed effects model**

$I^2 = 59\%$

**Replication**

IHGC16noFIno23

HUNT

**Fixed effects model**

$I^2 = 0\%$

**Fixed effects model**

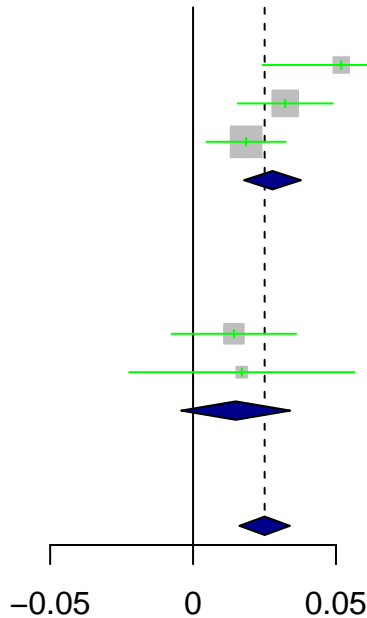

0.05 [0.02; 0.08]

0.03 [0.02; 0.05]

0.02 [0.00; 0.03]

**0.03 [0.02; 0.04] 4.40e-08**

0.01 [-0.01; 0.04]

0.02 [-0.02; 0.06]

**0.01 [-0.00; 0.03] 1.25e-01**

**0.03 [0.02; 0.03] 2.59e-08**



rs11187838 (G)

BETA

BETA

95%-CI

P-value

**Discovery**

UKBB

FinnGen

23andMe

**Fixed effects model**

$I^2 = 0\%$

**Replication**

IHGC16noFIno23

HUNT

**Fixed effects model**

$I^2 = 58\%$

**Fixed effects model**

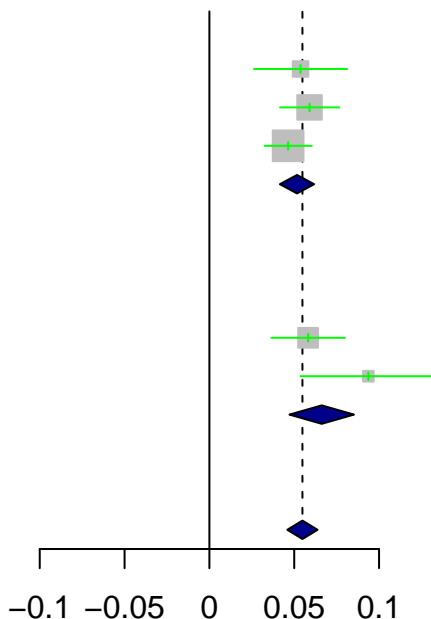

0.05 [0.03; 0.08]

0.06 [0.04; 0.08]

0.05 [0.03; 0.06]

**0.05 [0.04; 0.06] 1.26e-23**

0.06 [0.04; 0.08]

0.09 [0.05; 0.13]

**0.07 [0.05; 0.09] 8.51e-12**

**0.05 [0.05; 0.06] 1.76e-33**

rs7082605 (C)

BETA

BETA

95%-CI

P-value

**Discovery**

UKBB

FinnGen

23andMe

**Fixed effects model**

$I^2 = 0\%$

**Replication**

IHGC16noFIno23

HUNT

**Fixed effects model**

$I^2 = 0\%$

**Fixed effects model**

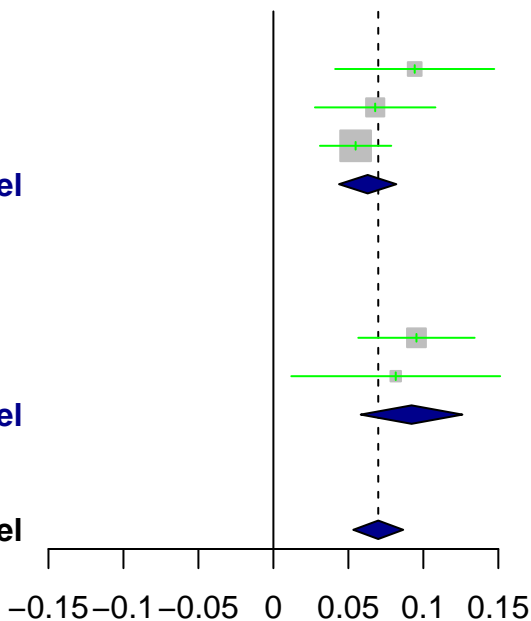

0.09 [0.04; 0.15]

0.07 [0.03; 0.11]

0.05 [0.03; 0.08]

**0.06 [0.04; 0.08] 1.11e-10**

0.10 [0.06; 0.13]

0.08 [0.01; 0.15]

**0.09 [0.06; 0.13] 9.97e-08**

**0.07 [0.05; 0.09] 1.74e-16**

rs869432 (A)

BETA

BETA

95%-CI

P-value

**Discovery**

UKBB

FinnGen

23andMe

**Fixed effects model**

$I^2 = 71\%$

**Replication**

IHGC16noFIno23

HUNT

**Fixed effects model**

$I^2 = 0\%$

**Fixed effects model**

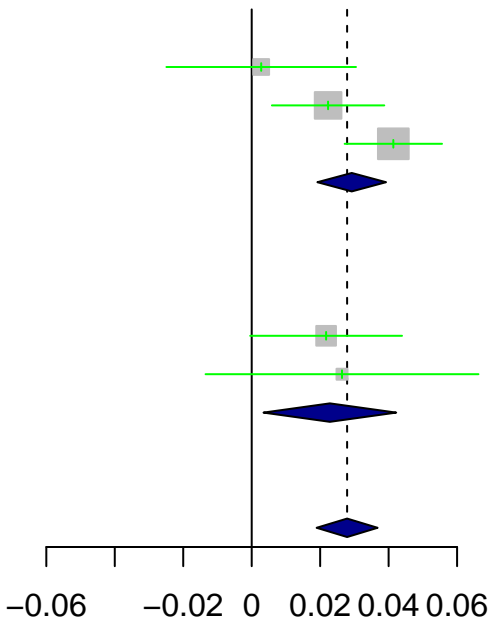

rs2672592 (T)

BETA

BETA

95%-CI

P-value

**Discovery**

UKBB

FinnGen

23andMe

**Fixed effects model**

$I^2 = 0\%$

**Replication**

IHGC16noFIno23

HUNT

**Fixed effects model**

$I^2 = 0\%$

**Fixed effects model**

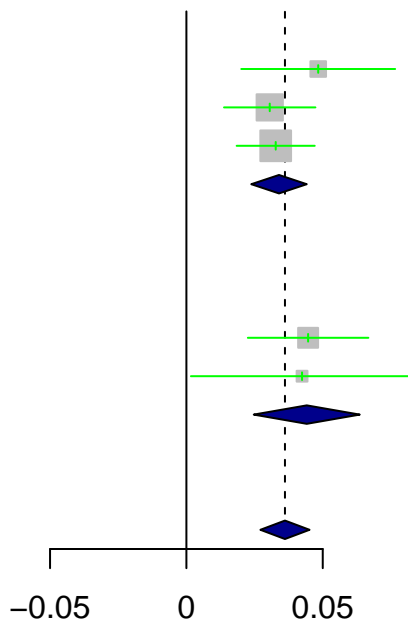

rs1571422 (T)

BETA

BETA

95%-CI

P-value

**Discovery**

UKBB

FinnGen

23andMe

**Fixed effects model**

$I^2 = 0\%$

**Replication**

IHGC16noFIno23

HUNT

**Fixed effects model**

$I^2 = 0\%$

**Fixed effects model**

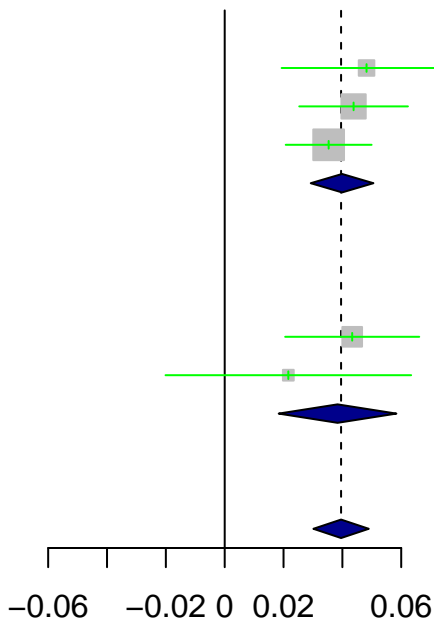

0.05 [ 0.02; 0.08]

0.04 [ 0.03; 0.06]

0.04 [ 0.02; 0.05]

**0.04 [ 0.03; 0.05] 2.13e-13**

0.04 [ 0.02; 0.07]

0.02 [-0.02; 0.06]

**0.04 [ 0.02; 0.06] 1.71e-04**

**0.04 [ 0.03; 0.05] 1.57e-16**

rs200314499 (D)

BETA

BETA

95%-CI

P-value

**Discovery**

UKBB

FinnGen

23andMe

**Fixed effects model**

$I^2 = 48\%$

**Replication**

IHGC16noFIno23

HUNT

**Fixed effects model**

$I^2 = 0\%$

**Fixed effects model**

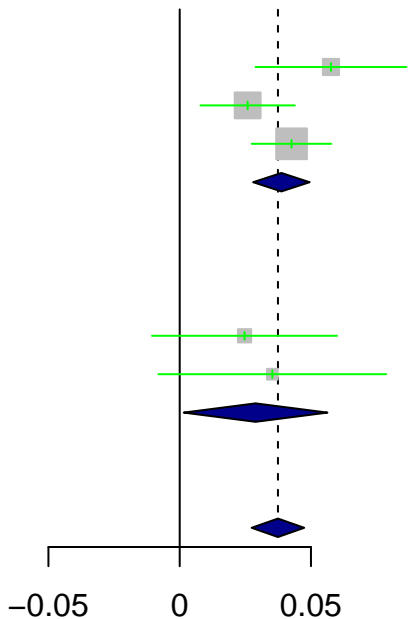

0.06 [0.03; 0.09]

0.03 [0.01; 0.04]

0.04 [0.03; 0.06]

**0.04 [0.03; 0.05] 1.66e-12**

0.02 [-0.01; 0.06]

0.04 [-0.01; 0.08]

**0.03 [0.00; 0.06] 3.84e-02**

**0.04 [0.03; 0.05] 2.23e-13**

rs4391795 (T)

BETA

BETA

95%-CI

P-value

**Discovery**

UKBB

FinnGen

23andMe

**Fixed effects model**

$I^2 = 74\%$

**Replication**

IHGC16noFIno23

HUNT

**Fixed effects model**

$I^2 = 39\%$

**Fixed effects model**

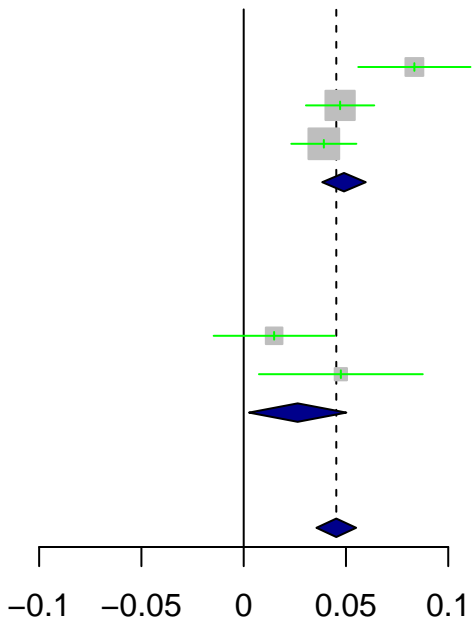

0.08 [0.06; 0.11]

0.05 [0.03; 0.06]

0.04 [0.02; 0.06]

**0.05 [0.04; 0.06] 1.54e-19**

0.01 [-0.01; 0.04]

0.05 [0.01; 0.09]

**0.03 [0.00; 0.05] 2.97e-02**

**0.05 [0.04; 0.05] 5.79e-20**

rs34494849 (C)

BETA

BETA

95%-CI

P-value

**Discovery**

UKBB

FinnGen

23andMe

**Fixed effects model**

$I^2 = 0\%$

**Replication**

IHGC16noFIno23

HUNT

**Fixed effects model**

$I^2 = 0\%$

**Fixed effects model**

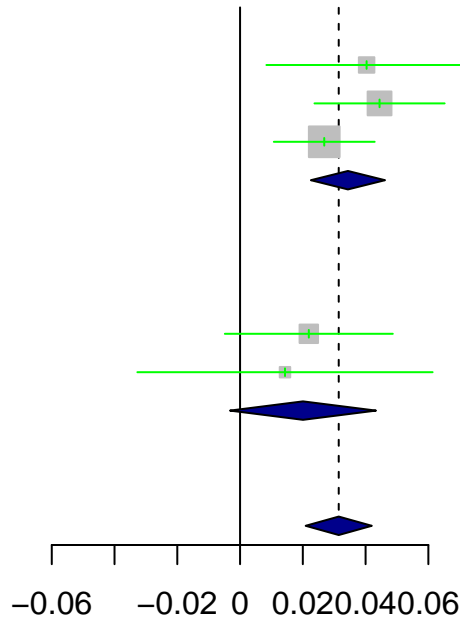



rs4910165 (G)

BETA

BETA

95%-CI

P-value

**Discovery**

UKBB

FinnGen

23andMe

**Fixed effects model**

$I^2 = 52\%$

**Replication**

IHGC16noFIno23

HUNT

**Fixed effects model**

$I^2 = 0\%$

**Fixed effects model**

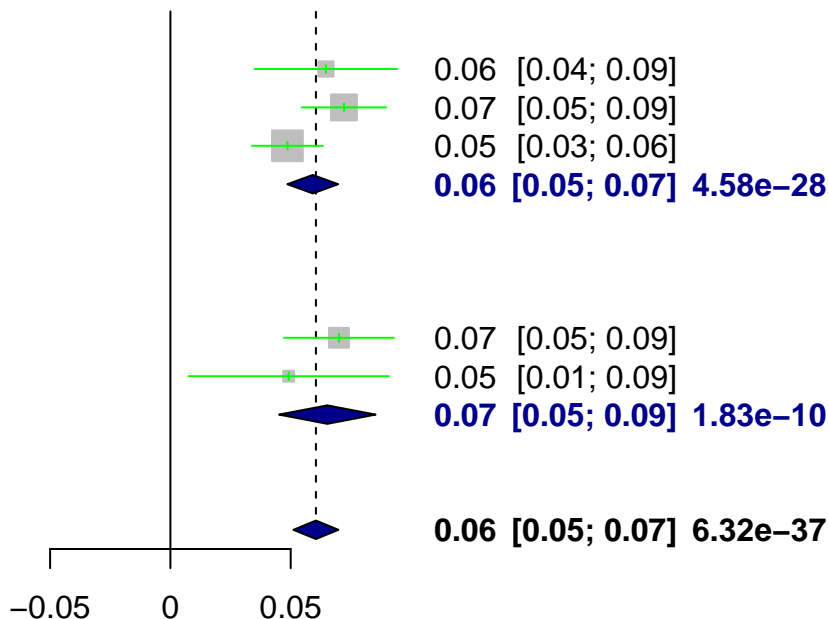

rs10832337 (A)

BETA

BETA

95%-CI

P-value

**Discovery**

UKBB

FinnGen

23andMe

**Fixed effects model**

$I^2 = 77\%$

**Replication**

IHGC16noFIno23

HUNT

**Fixed effects model**

$I^2 = 0\%$

**Fixed effects model**

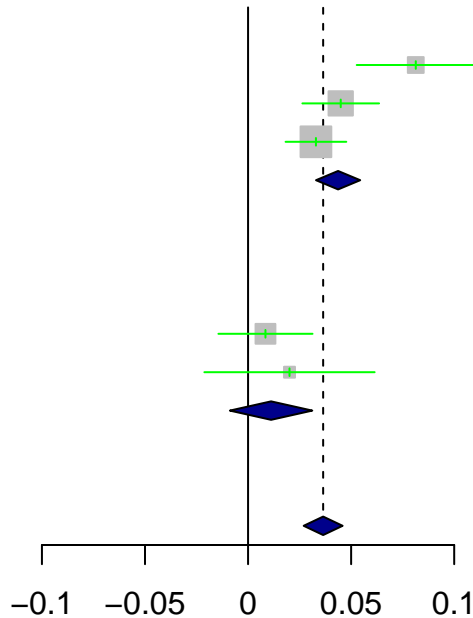

rs11606309 (T)

BETA

BETA

95%-CI

P-value

**Discovery**

UKBB

FinnGen

23andMe

**Fixed effects model**

$I^2 = 0\%$

**Replication**

IHGC16noFIno23

HUNT

**Fixed effects model**

$I^2 = 0\%$

**Fixed effects model**

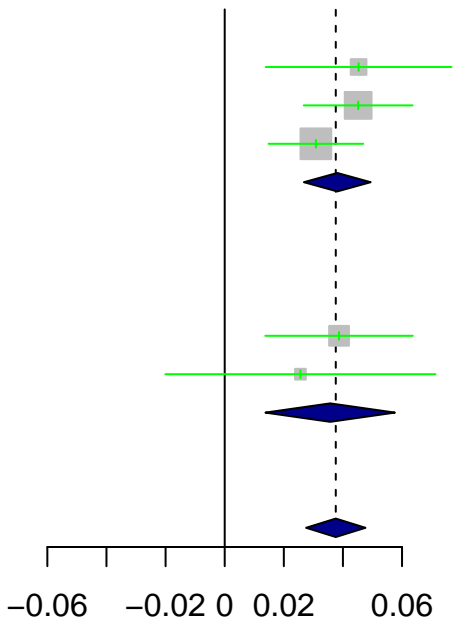

rs12577142 (T)

BETA

BETA

95%-CI

P-value

**Discovery**

UKBB

FinnGen

23andMe

**Fixed effects model**

$I^2 = 0\%$

**Replication**

IHGC16noFIno23

HUNT

**Fixed effects model**

$I^2 = 0\%$

**Fixed effects model**

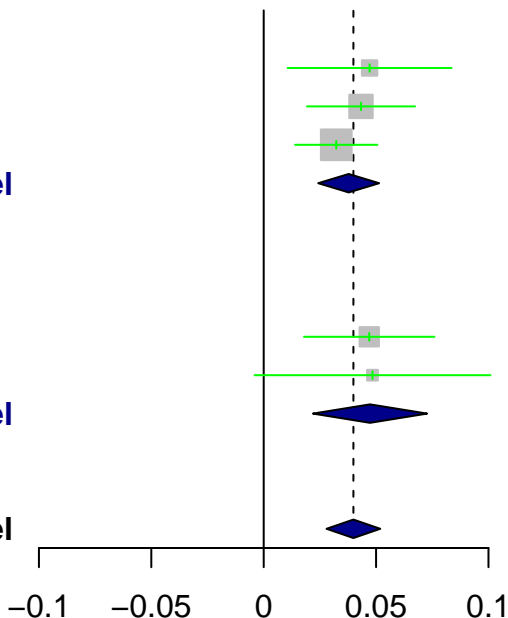

rs11039324 (G)

BETA

BETA

95%-CI

P-value

**Discovery**

UKBB

FinnGen

23andMe

**Fixed effects model**

$I^2 = 13\%$

**Replication**

IHGC16noFIno23

HUNT

**Fixed effects model**

$I^2 = 0\%$

**Fixed effects model**

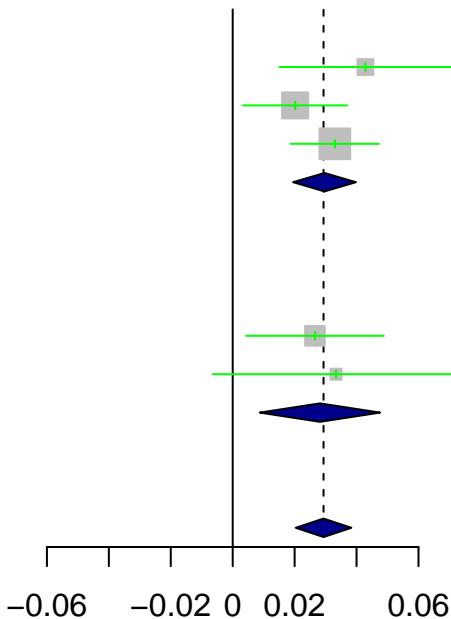

0.04 [0.02; 0.07]

0.02 [0.00; 0.04]

0.03 [0.02; 0.05]

**0.03 [0.02; 0.04] 9.76e-09**

0.03 [0.00; 0.05]

0.03 [-0.01; 0.07]

**0.03 [0.01; 0.05] 4.45e-03**

**0.03 [0.02; 0.04] 1.51e-10**

rs639311 (C)

BETA

BETA

95%-CI

P-value

**Discovery**

UKBB

FinnGen

23andMe

**Fixed effects model**

$I^2 = 61\%$

**Replication**

IHGC16noFIno23

HUNT

**Fixed effects model**

$I^2 = 0\%$

**Fixed effects model**

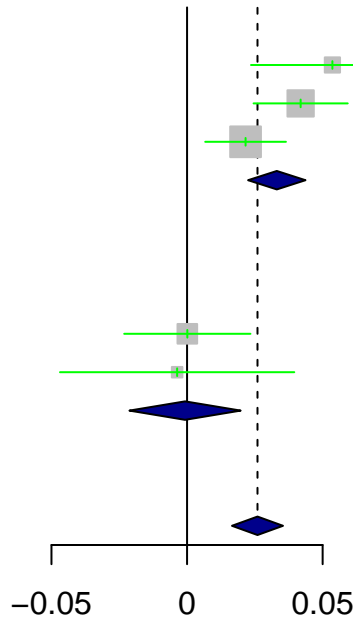

rs12226331 (T)

BETA

BETA

95%-CI

P-value

**Discovery**

UKBB

FinnGen

23andMe

**Fixed effects model**

$I^2 = 0\%$

**Replication**

IHGC16noFIno23

HUNT

**Fixed effects model**

$I^2 = 0\%$

**Fixed effects model**

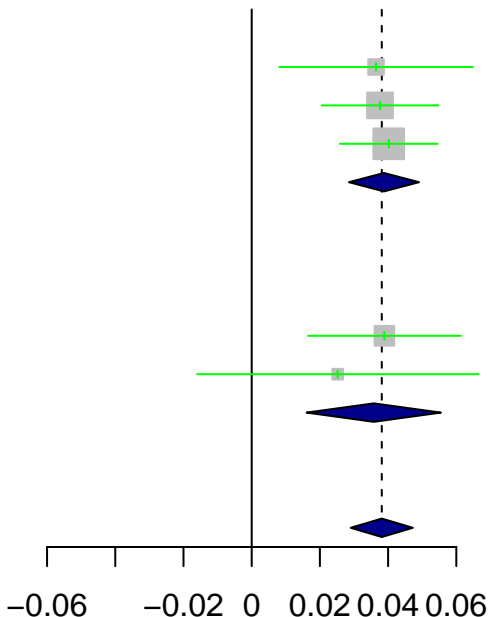

rs140668749 (I)

BETA

BETA

95%-CI

P-value

**Discovery**

UKBB

FinnGen

23andMe

**Fixed effects model**

$I^2 = 0\%$

**Replication**

IHGC16noFIno23

HUNT

**Fixed effects model**

$I^2 = 44\%$

**Fixed effects model**

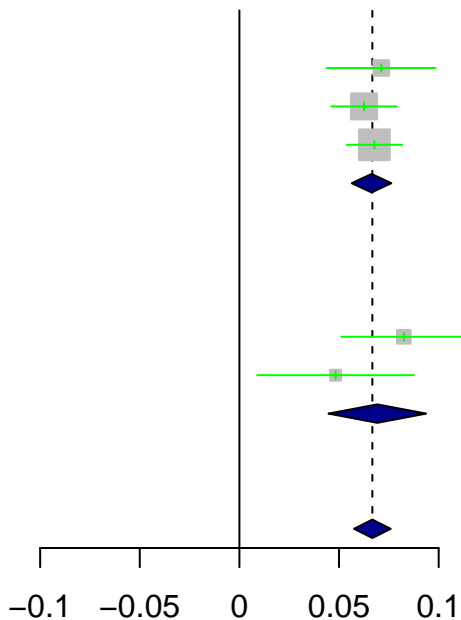

0.07 [0.04; 0.10]

0.06 [0.05; 0.08]

0.07 [0.05; 0.08]

**0.07 [0.06; 0.08] 3.89e-39**

0.08 [0.05; 0.11]

0.05 [0.01; 0.09]

**0.07 [0.04; 0.09] 3.03e-08**

**0.07 [0.06; 0.08] 7.25e-46**



rs12369125 (A)

BETA

BETA

95%-CI

P-value

**Discovery**

UKBB

FinnGen

23andMe

**Fixed effects model**

$I^2 = 42\%$

**Replication**

IHGC16noFIno23

HUNT

**Fixed effects model**

$I^2 = 0\%$

**Fixed effects model**

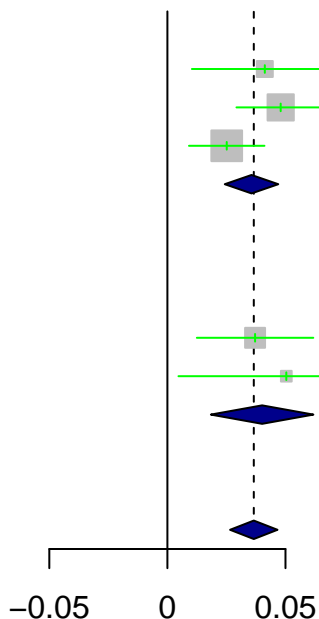

0.04 [0.01; 0.07]

0.05 [0.03; 0.07]

0.03 [0.01; 0.04]

**0.04 [0.02; 0.05] 7.08e-10**

0.04 [0.01; 0.06]

0.05 [0.00; 0.10]

**0.04 [0.02; 0.06] 2.92e-04**

**0.04 [0.03; 0.05] 9.00e-13**

rs10784428 (A)

BETA

BETA

95%-CI

P-value

**Discovery**

UKBB

FinnGen

23andMe

**Fixed effects model**

$I^2 = 0\%$

**Replication**

IHGC16noFIno23

HUNT

**Fixed effects model**

$I^2 = 83\%$

**Fixed effects model**

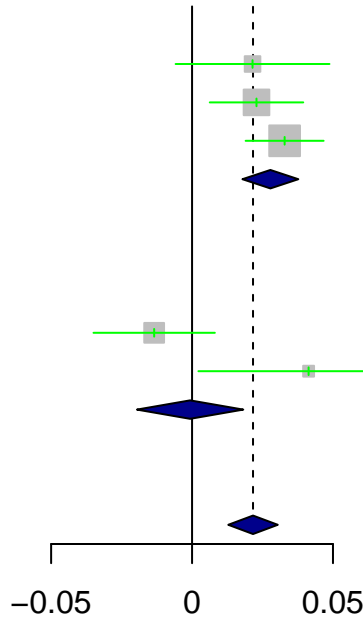

0.02 [-0.01; 0.05]

0.02 [ 0.01; 0.04]

0.03 [ 0.02; 0.05]

**0.03 [ 0.02; 0.04] 3.92e-08**

-0.01 [-0.03; 0.01]

0.04 [ 0.00; 0.08]

**-0.00 [-0.02; 0.02] 9.43e-01**

**0.02 [ 0.01; 0.03] 1.33e-06**

rs1458170 (C)

BETA

BETA

95%-CI

P-value

**Discovery**

UKBB

FinnGen

23andMe

**Fixed effects model**

$I^2 = 37\%$

**Replication**

IHGC16noFIno23

HUNT

**Fixed effects model**

$I^2 = 0\%$

**Fixed effects model**

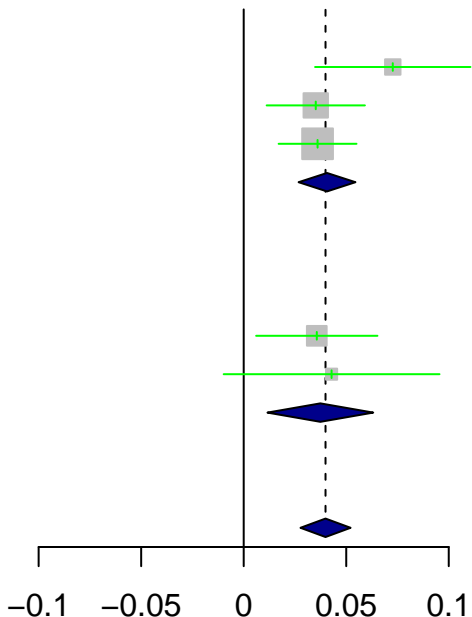

0.07 [ 0.03; 0.11]

0.04 [ 0.01; 0.06]

0.04 [ 0.02; 0.06]

**0.04 [ 0.03; 0.05] 9.27e-09**

0.04 [ 0.01; 0.07]

0.04 [-0.01; 0.10]

**0.04 [ 0.01; 0.06] 4.50e-03**

**0.04 [ 0.03; 0.05] 1.48e-10**

rs11172113 (T)

BETA

BETA

95%-CI

P-value

**Discovery**

UKBB

FinnGen

23andMe

**Fixed effects model**

$I^2 = 74\%$

**Replication**

IHGC16noFIno23

HUNT

**Fixed effects model**

$I^2 = 0\%$

**Fixed effects model**

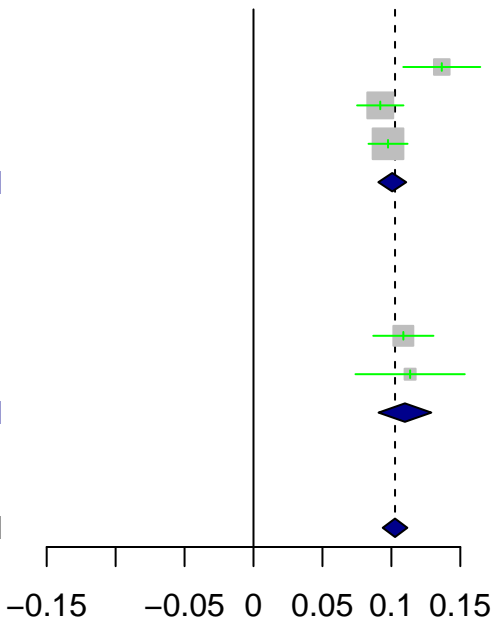

0.14 [0.11; 0.16]

0.09 [0.08; 0.11]

0.10 [0.08; 0.11]

**0.10 [0.09; 0.11] 7.27e-85**

0.11 [0.09; 0.13]

0.11 [0.07; 0.15]

**0.11 [0.09; 0.13] 2.14e-29**

**0.10 [0.09; 0.11] 2.38e-112**

rs73187675 (T)

BETA

BETA

95%-CI

P-value

**Discovery**

UKBB

FinnGen

23andMe

**Fixed effects model**

$I^2 = 0\%$

**Replication**

IHGC16noFIno23

HUNT

**Fixed effects model**

$I^2 = 0\%$

**Fixed effects model**

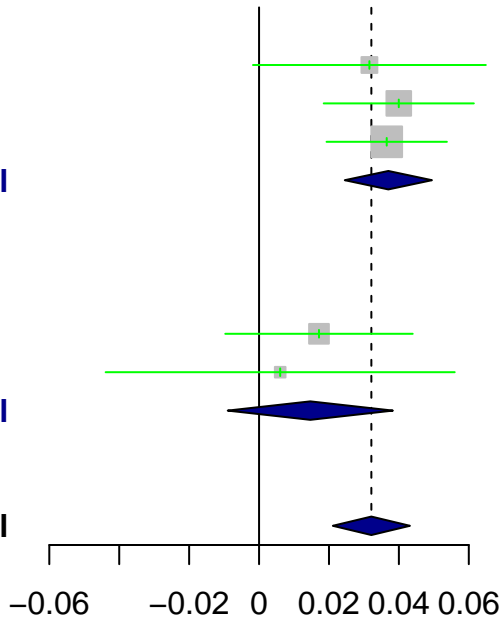

rs10777902 (A)

BETA

BETA

95%-CI

P-value

**Discovery**

UKBB

FinnGen

23andMe

**Fixed effects model**

$I^2 = 61\%$

**Replication**

IHGC16noFIno23

HUNT

**Fixed effects model**

$I^2 = 0\%$

**Fixed effects model**

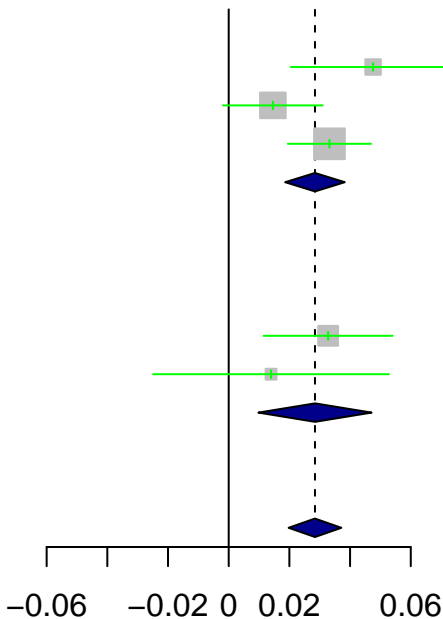

0.05 [0.02; 0.07]

0.01 [-0.00; 0.03]

0.03 [0.02; 0.05]

**0.03 [0.02; 0.04] 1.42e-08**

0.03 [0.01; 0.05]

0.01 [-0.02; 0.05]

**0.03 [0.01; 0.05] 2.80e-03**

**0.03 [0.02; 0.04] 1.41e-10**

rs7335684 (G)

BETA

BETA

95%-CI

P-value

**Discovery**

UKBB

FinnGen

23andMe

**Fixed effects model**

$I^2 = 0\%$

**Replication**

IHGC16noFIno23

HUNT

**Fixed effects model**

$I^2 = 0\%$

**Fixed effects model**

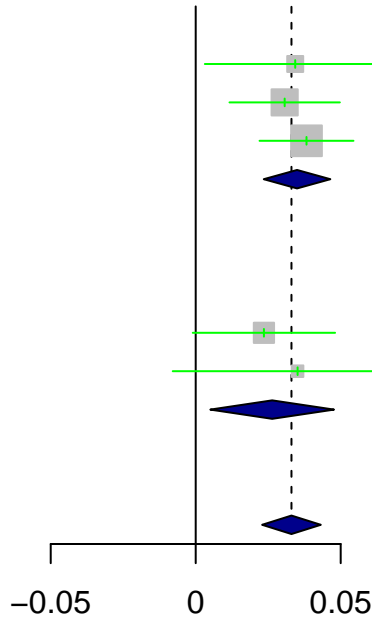

0.03 [ 0.00; 0.07]

0.03 [ 0.01; 0.05]

0.04 [ 0.02; 0.05]

**0.03 [ 0.02; 0.05] 2.42e-09**

0.02 [-0.00; 0.05]

0.04 [-0.01; 0.08]

**0.03 [ 0.01; 0.05] 1.53e-02**

**0.03 [ 0.02; 0.04] 1.48e-10**

rs2000660 (A)

BETA

BETA

95%-CI

P-value

**Discovery**

UKBB

FinnGen

23andMe

**Fixed effects model**

$I^2 = 27\%$

**Replication**

IHGC16noFIno23

HUNT

**Fixed effects model**

$I^2 = 87\%$

**Fixed effects model**

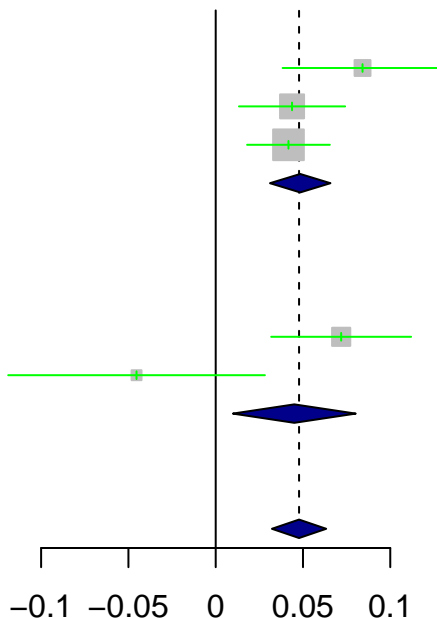



rs17362576 (C)

BETA

BETA

95%-CI

P-value

**Discovery**

UKBB

FinnGen

23andMe

**Fixed effects model**

$I^2 = 78\%$

**Replication**

IHGC16noFIno23

HUNT

**Fixed effects model**

$I^2 = 0\%$

**Fixed effects model**

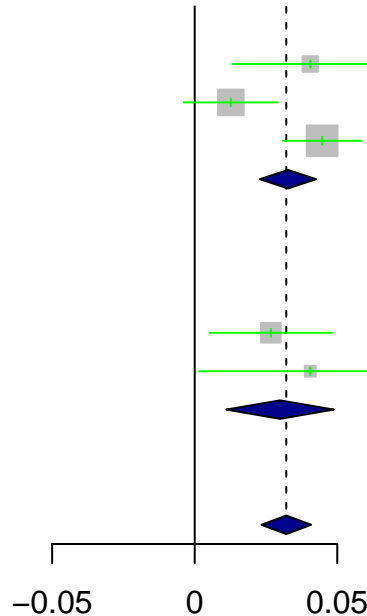

0.04 [0.01; 0.07]

0.01 [-0.00; 0.03]

0.04 [0.03; 0.06]

**0.03 [0.02; 0.04] 7.66e-11**

0.03 [0.01; 0.05]

0.04 [0.00; 0.08]

**0.03 [0.01; 0.05] 1.83e-03**

**0.03 [0.02; 0.04] 5.41e-13**

rs1957110 (T)

BETA

BETA

95%-CI

P-value

**Discovery**

UKBB

FinnGen

23andMe

**Fixed effects model**

$I^2 = 0\%$

**Replication**

IHGC16noFIno23

HUNT

**Fixed effects model**

$I^2 = 71\%$

**Fixed effects model**

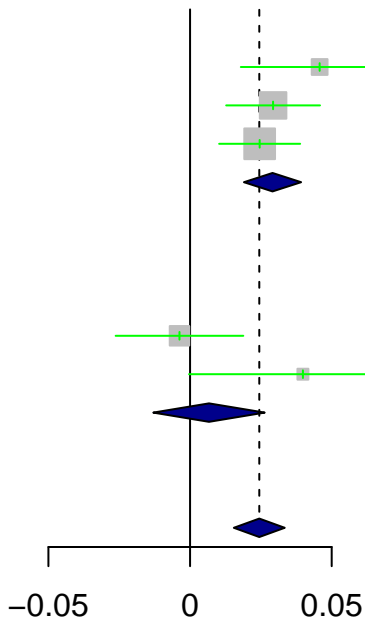

0.05 [0.02; 0.07]

0.03 [0.01; 0.05]

0.02 [0.01; 0.04]

**0.03 [0.02; 0.04] 1.59e-08**

-0.00 [-0.03; 0.02]

0.04 [-0.00; 0.08]

**0.01 [-0.01; 0.03] 5.05e-01**

**0.02 [0.02; 0.03] 9.49e-08**

rs2296919 (T)

BETA

BETA

95%-CI

P-value

**Discovery**

UKBB

FinnGen

23andMe

**Fixed effects model**

$I^2 = 0\%$

**Replication**

IHGC16noFIno23

HUNT

**Fixed effects model**

$I^2 = 58\%$

**Fixed effects model**

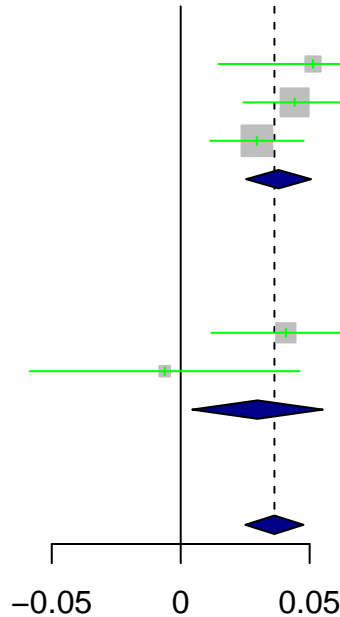

0.05 [0.01; 0.09]

0.04 [0.02; 0.06]

0.03 [0.01; 0.05]

**0.04 [0.03; 0.05] 3.44e-09**

0.04 [0.01; 0.07]

-0.01 [-0.06; 0.05]

**0.03 [0.00; 0.06] 2.11e-02**

**0.04 [0.03; 0.05] 2.58e-10**

rs7155543 (G)

BETA

BETA

95%-CI

P-value

**Discovery**

UKBB

FinnGen

23andMe

**Fixed effects model**

$r^2 = 40\%$

**Replication**

IHGC16noFIno23

HUNT

**Fixed effects model**

$r^2 = 0\%$

**Fixed effects model**

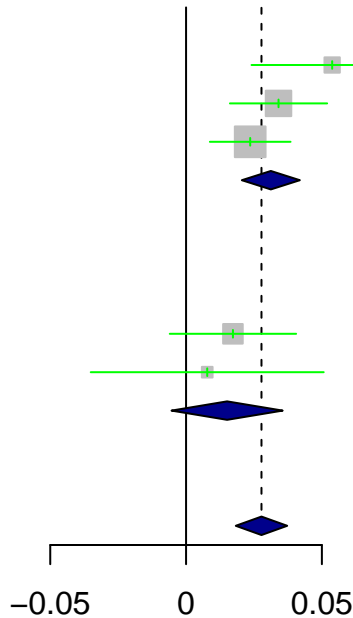

rs75002882 (G)

BETA

BETA

95%-CI

P-value

**Discovery**

UKBB

FinnGen

23andMe

**Fixed effects model**

$r^2 = 0\%$

**Replication**

IHGC16noFIno23

HUNT

**Fixed effects model**

$r^2 = 0\%$

**Fixed effects model**

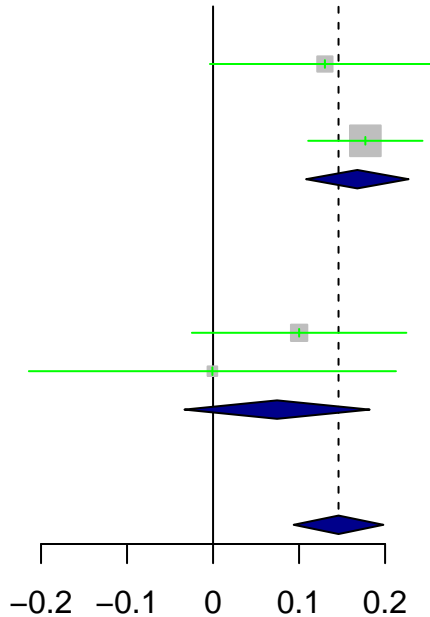

0.13 [-0.00; 0.26]

0.18 [0.11; 0.24]

**0.17 [0.11; 0.23] 3.39e-08**

0.10 [-0.02; 0.22]

-0.00 [-0.21; 0.21]

**0.07 [-0.03; 0.18] 1.75e-01**

**0.15 [0.09; 0.20] 4.02e-08**

rs117151272 (A)

BETA

BETA

95%-CI

P-value

**Discovery**

UKBB

FinnGen

23andMe

**Fixed effects model**

$I^2 = 59\%$

**Replication**

IHGC16noFIno23

HUNT

**Fixed effects model**

$I^2 = 0\%$

**Fixed effects model**

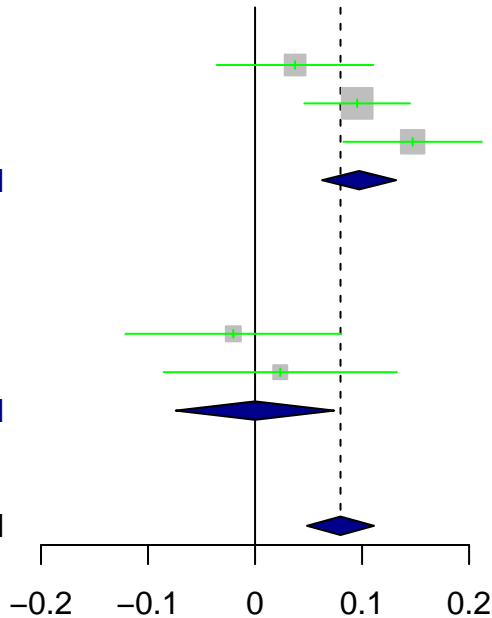

rs11624776 (A)

BETA

BETA

95%-CI

P-value

**Discovery**

UKBB

0.05 [0.02; 0.08]

FinnGen

0.03 [0.01; 0.05]

23andMe

0.05 [0.03; 0.06]

**Fixed effects model**

$I^2 = 19\%$

**0.04 [0.03; 0.05] 7.09e-15**

**Replication**

IHGC16noFIno23

0.04 [0.01; 0.06]

HUNT

0.12 [0.07; 0.16]

**Fixed effects model**

$I^2 = 90\%$

**0.06 [0.04; 0.08] 1.48e-07**

**Fixed effects model**

**0.05 [0.04; 0.05] 1.11e-20**

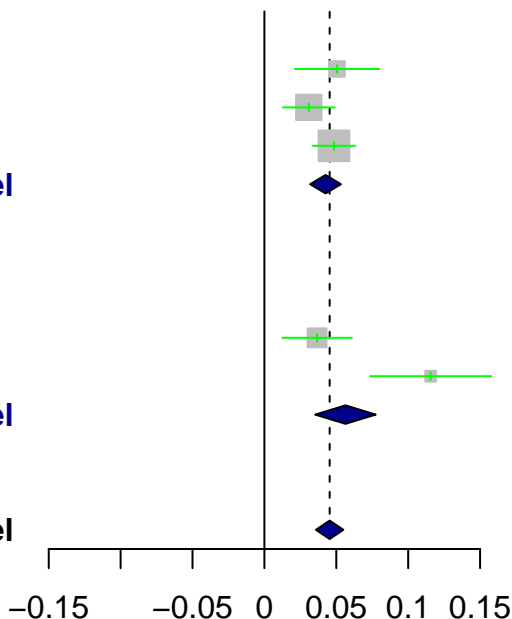

rs28929474 (T)

BETA

BETA

95%-CI

P-value

**Discovery**

UKBB

FinnGen

23andMe

**Fixed effects model**

$I^2 = 49\%$

**Replication**

IHGC16noFIno23

HUNT

**Fixed effects model**

$I^2 = 50\%$

**Fixed effects model**

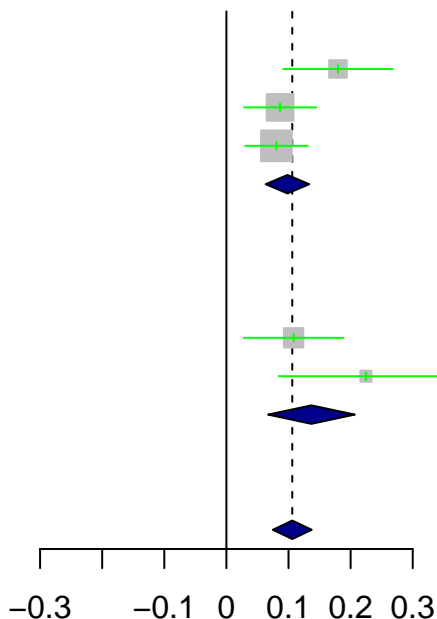

0.18 [0.09; 0.27]

0.09 [0.03; 0.14]

0.08 [0.03; 0.13]

**0.10 [0.06; 0.13] 3.79e-08**

0.11 [0.03; 0.19]

0.22 [0.08; 0.37]

**0.14 [0.07; 0.21] 1.19e-04**

**0.11 [0.07; 0.14] 3.02e-11**



rs1899730 (T)

BETA

BETA

95%-CI

P-value

**Discovery**

UKBB

FinnGen

23andMe

**Fixed effects model**

$I^2 = 15\%$

**Replication**

IHGC16noFIno23

HUNT

**Fixed effects model**

$I^2 = 0\%$

**Fixed effects model**

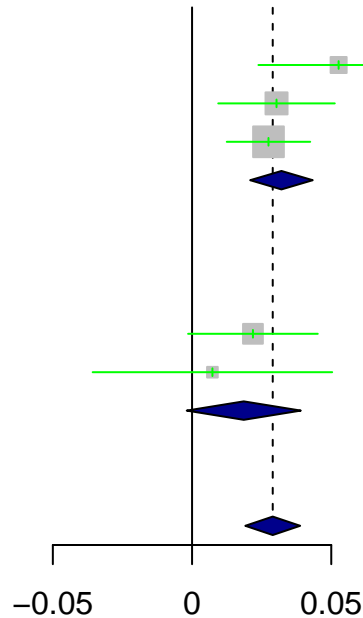

rs12910861 (C)

BETA

BETA

95%-CI

P-value

**Discovery**

UKBB

FinnGen

23andMe

**Fixed effects model**

$I^2 = 0\%$

**Replication**

IHGC16noFIno23

HUNT

**Fixed effects model**

$I^2 = 65\%$

**Fixed effects model**

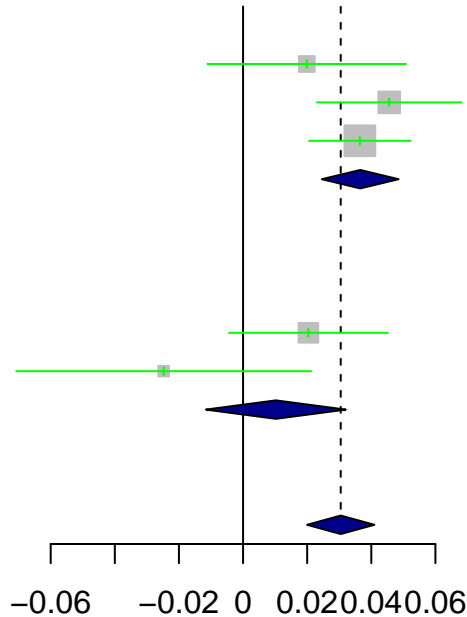

rs2118782 (C)

BETA

BETA

95%-CI

P-value

**Discovery**

UKBB

FinnGen

23andMe

**Fixed effects model**

$I^2 = 0\%$

**Replication**

IHGC16noFlno23

HUNT

**Fixed effects model**

$I^2 = 88\%$

**Fixed effects model**

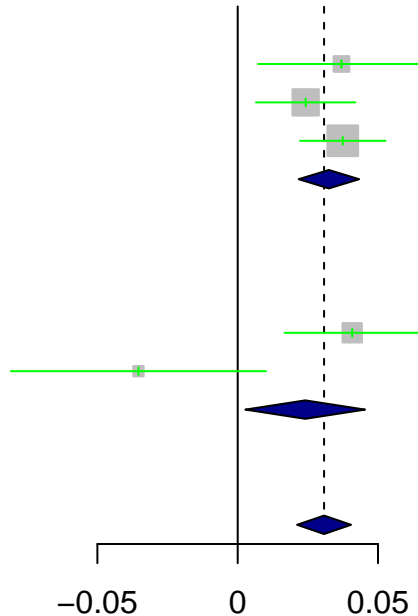

0.04 [ 0.01; 0.07]

0.02 [ 0.01; 0.04]

0.04 [ 0.02; 0.05]

**0.03 [ 0.02; 0.04] 3.46e-09**

0.04 [ 0.02; 0.06]

-0.04 [-0.08; 0.01]

**0.02 [ 0.00; 0.05] 2.69e-02**

**0.03 [ 0.02; 0.04] 3.49e-10**

rs118002018 (T)

BETA

BETA

95%-CI

P-value

**Discovery**

UKBB

FinnGen

23andMe

**Fixed effects model**

$I^2 = 0\%$

**Replication**

IHGC16noFIno23

HUNT

**Fixed effects model**

$I^2 = 0\%$

**Fixed effects model**

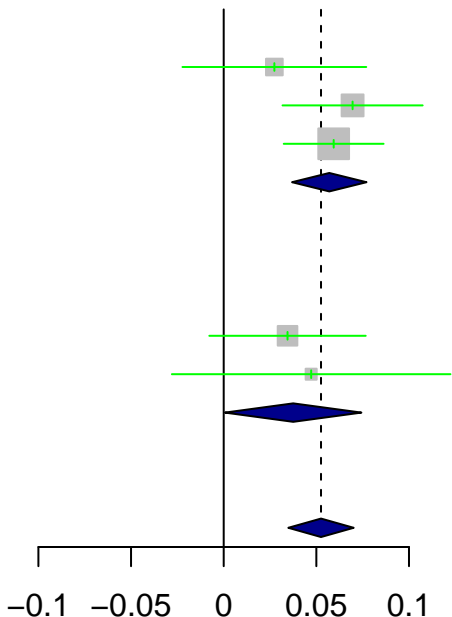

rs9934328 (C)

BETA

BETA

95%-CI

P-value

**Discovery**

UKBB

FinnGen

23andMe

**Fixed effects model**

$I^2 = 0\%$

**Replication**

IHGC16noFlno23

HUNT

**Fixed effects model**

$I^2 = 0\%$

**Fixed effects model**

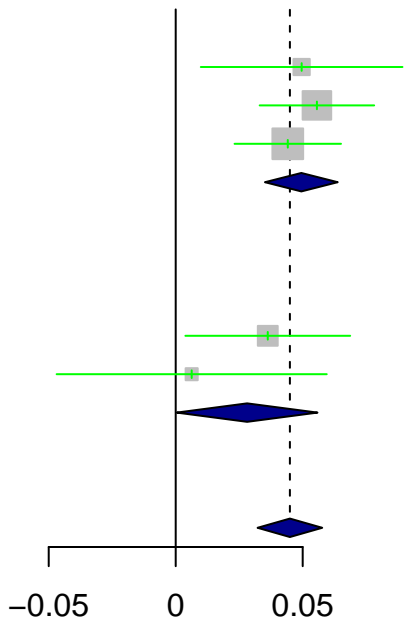

0.05 [ 0.01; 0.09]

0.06 [ 0.03; 0.08]

0.04 [ 0.02; 0.07]

**0.05 [ 0.04; 0.06] 1.32e-11**

0.04 [ 0.00; 0.07]

0.01 [-0.05; 0.06]

**0.03 [ 0.00; 0.06] 4.66e-02**

**0.04 [ 0.03; 0.06] 4.23e-12**

rs34689419 (D)

BETA

BETA

95%-CI

P-value

**Discovery**

UKBB

FinnGen

23andMe

**Fixed effects model**

$I^2 = 11\%$

**Replication**

IHGC16noFIno23

HUNT

**Fixed effects model**

not applicable

**Fixed effects model**

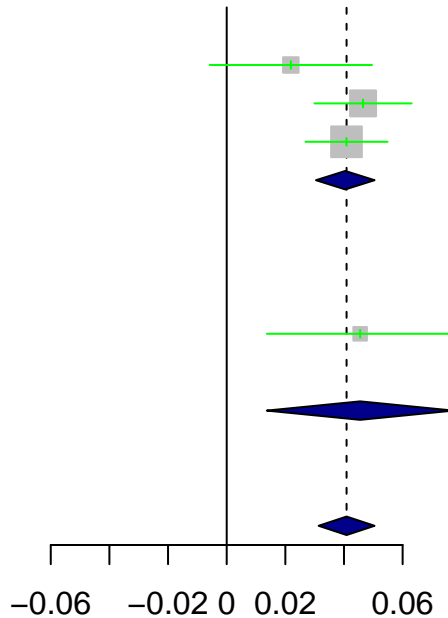

rs8052831 (G)

BETA

BETA

95%-CI

P-value

**Discovery**

UKBB

FinnGen

23andMe

**Fixed effects model**

$I^2 = 88\%$

**Replication**

IHGC16noFIno23

HUNT

**Fixed effects model**

$I^2 = 60\%$

**Fixed effects model**

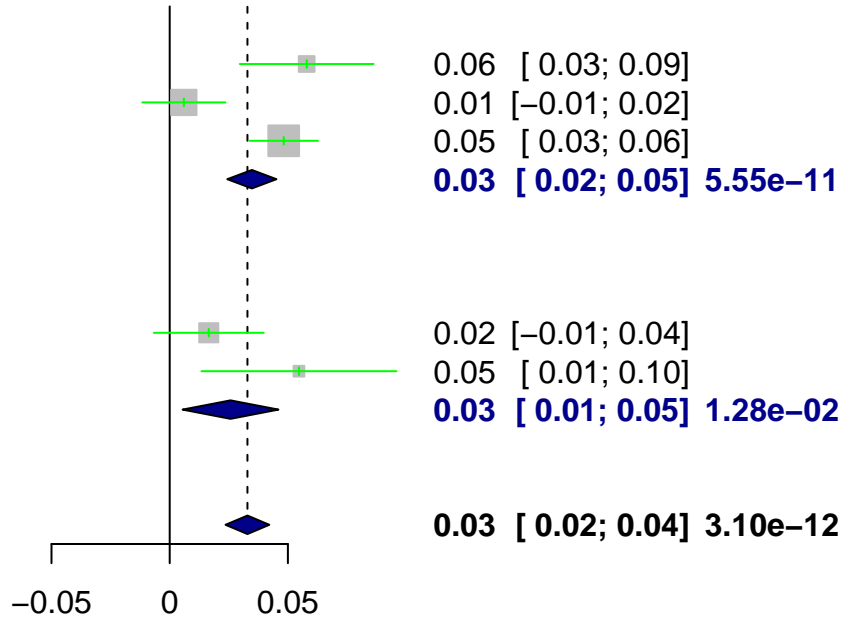

rs2292750 (C)

BETA

BETA

95%-CI

P-value

**Discovery**

UKBB

FinnGen

23andMe

**Fixed effects model**

$I^2 = 59\%$

**Replication**

IHGC16noFIno23

HUNT

**Fixed effects model**

$I^2 = 0\%$

**Fixed effects model**

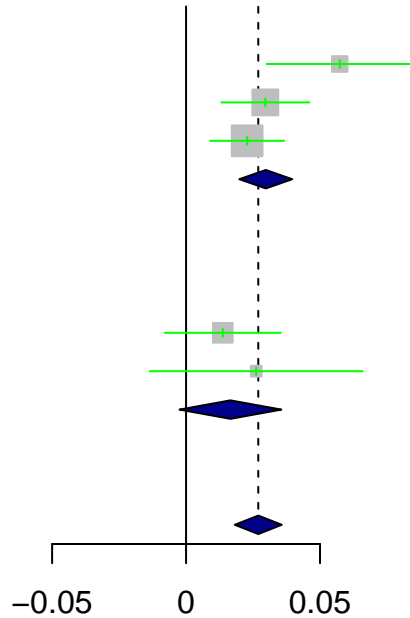

0.06 [0.03; 0.08]

0.03 [0.01; 0.05]

0.02 [0.01; 0.04]

**0.03 [0.02; 0.04] 3.53e-09**

0.01 [-0.01; 0.04]

0.03 [-0.01; 0.07]

**0.02 [-0.00; 0.04] 8.76e-02**

**0.03 [0.02; 0.04] 1.63e-09**

-0.05 0 0.05



rs2555111 (C)

BETA

BETA

95%-CI

P-value

**Discovery**

UKBB

FinnGen

23andMe

**Fixed effects model**

$I^2 = 0\%$

**Replication**

IHGC16noFIno23

HUNT

**Fixed effects model**

$I^2 = 0\%$

**Fixed effects model**

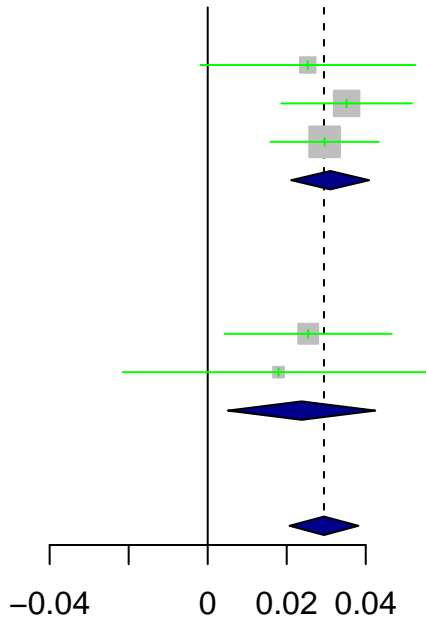

0.03 [-0.00; 0.05]

0.04 [0.02; 0.05]

0.03 [0.02; 0.04]

**0.03 [0.02; 0.04] 7.09e-10**

0.03 [0.00; 0.05]

0.02 [-0.02; 0.06]

**0.02 [0.01; 0.04] 1.25e-02**

**0.03 [0.02; 0.04] 3.58e-11**

rs2119930 (G)

BETA

BETA

95%-CI

P-value

**Discovery**

UKBB

FinnGen

23andMe

**Fixed effects model**

$I^2 = 7\%$

**Replication**

IHGC16noFIno23

HUNT

**Fixed effects model**

$I^2 = 73\%$

**Fixed effects model**

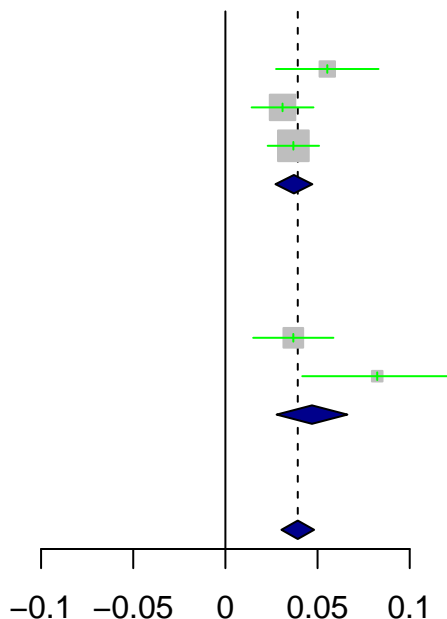

rs1285294 (C)

BETA

BETA

95%-CI

P-value

**Discovery**

UKBB

FinnGen

23andMe

**Fixed effects model**

$I^2 = 0\%$

**Replication**

IHGC16noFIno23

HUNT

**Fixed effects model**

$I^2 = 0\%$

**Fixed effects model**

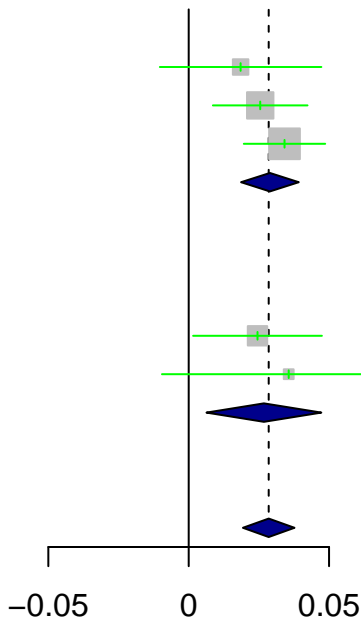

0.02 [-0.01; 0.05]

0.03 [ 0.01; 0.04]

0.03 [ 0.02; 0.05]

**0.03 [ 0.02; 0.04] 3.44e-08**

0.02 [ 0.00; 0.05]

0.04 [-0.01; 0.08]

**0.03 [ 0.01; 0.05] 1.02e-02**

**0.03 [ 0.02; 0.04] 1.15e-09**

rs55971860 (A)

BETA

BETA

95%-CI

P-value

**Discovery**

UKBB

FinnGen

23andMe

**Fixed effects model**

$I^2 = 0\%$

**Replication**

IHGC16noFIno23

HUNT

**Fixed effects model**

$I^2 = 84\%$

**Fixed effects model**

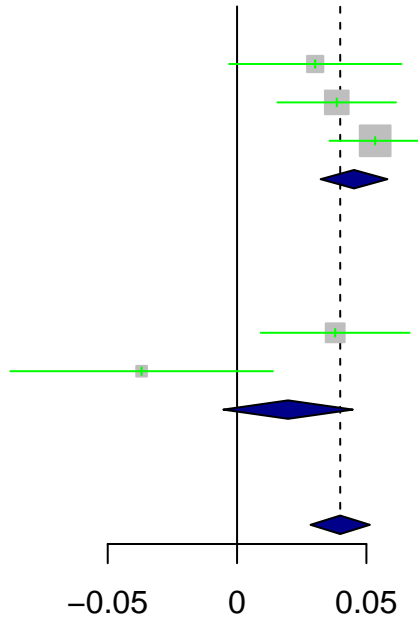

0.03 [-0.00; 0.06]

0.04 [ 0.02; 0.06]

0.05 [ 0.04; 0.07]

**0.05 [ 0.03; 0.06] 6.54e-12**

0.04 [ 0.01; 0.07]

-0.04 [-0.09; 0.01]

**0.02 [-0.01; 0.04] 1.23e-01**

**0.04 [ 0.03; 0.05] 9.31e-12**

rs7504540 (T)

BETA

BETA

95%-CI

P-value

**Discovery**

UKBB

FinnGen

23andMe

**Fixed effects model**

$I^2 = 55\%$

**Replication**

IHGC16noFIno23

HUNT

**Fixed effects model**

$I^2 = 0\%$

**Fixed effects model**

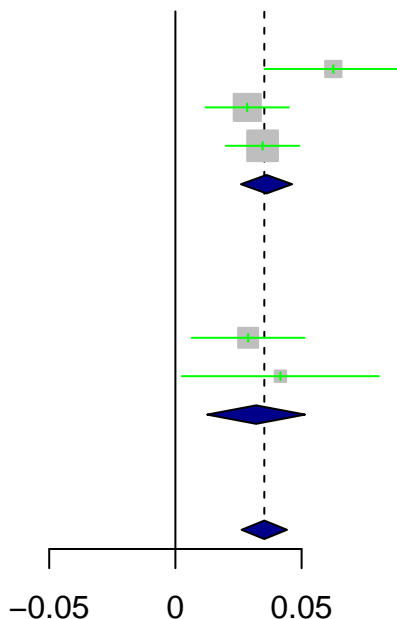

0.06 [0.04; 0.09]

0.03 [0.01; 0.04]

0.03 [0.02; 0.05]

**0.04 [0.03; 0.05] 2.93e-12**

0.03 [0.01; 0.05]

0.04 [0.00; 0.08]

**0.03 [0.01; 0.05] 1.24e-03**

**0.04 [0.03; 0.04] 1.49e-14**

rs10871745 (G)

BETA

BETA

95%-CI

P-value

**Discovery**

UKBB

FinnGen

23andMe

**Fixed effects model**

$I^2 = 0\%$

**Replication**

IHGC16noFIno23

HUNT

**Fixed effects model**

$I^2 = 34\%$

**Fixed effects model**

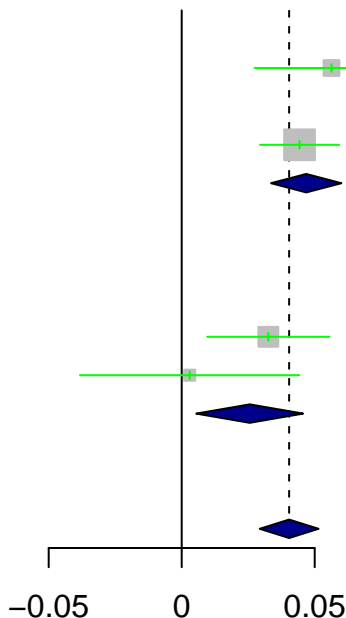

0.06 [ 0.03; 0.09]

0.04 [ 0.03; 0.06]

**0.05 [ 0.03; 0.06] 4.08e-12**

0.03 [ 0.01; 0.06]

0.00 [-0.04; 0.04]

**0.03 [ 0.01; 0.05] 1.26e-02**

**0.04 [ 0.03; 0.05] 7.59e-13**

rs7689991 (G)

BETA

BETA

95%-CI

P-value

**Discovery**

UKBB

FinnGen

23andMe

**Fixed effects model**

$I^2 = 0\%$

**Replication**

IHGC16noFIno23

HUNT

**Fixed effects model**

$I^2 = 0\%$

**Fixed effects model**

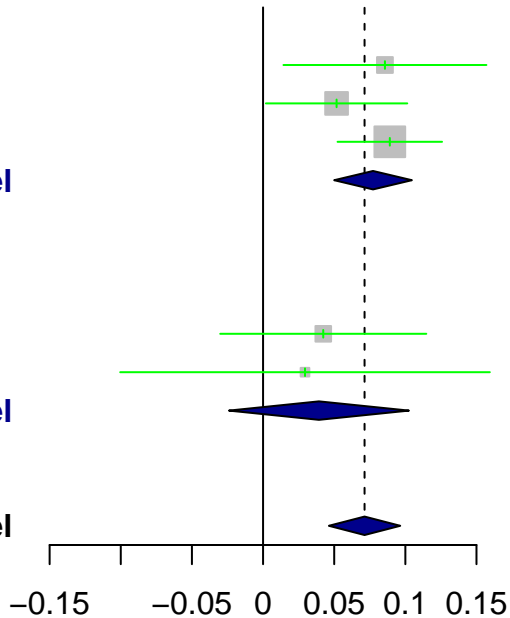

rs10405121 (G)

BETA

BETA

95%-CI

P-value

**Discovery**

UKBB

FinnGen

23andMe

**Fixed effects model**

$I^2 = 0\%$

**Replication**

IHGC16noFIno23

HUNT

**Fixed effects model**

$I^2 = 0\%$

**Fixed effects model**

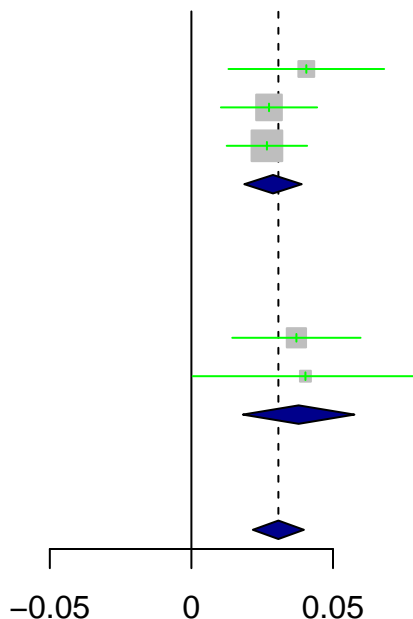

0.04 [0.01; 0.07]

0.03 [0.01; 0.04]

0.03 [0.01; 0.04]

**0.03 [0.02; 0.04] 2.53e-08**

0.04 [0.01; 0.06]

0.04 [0.00; 0.08]

**0.04 [0.02; 0.06] 1.64e-04**

**0.03 [0.02; 0.04] 2.36e-11**



rs74821481 (G)

BETA

BETA

95%-CI

P-value

**Discovery**

UKBB

FinnGen

23andMe

**Fixed effects model**

$I^2 = 61\%$

**Replication**

IHGC16noFIno23

HUNT

**Fixed effects model**

$I^2 = 0\%$

**Fixed effects model**

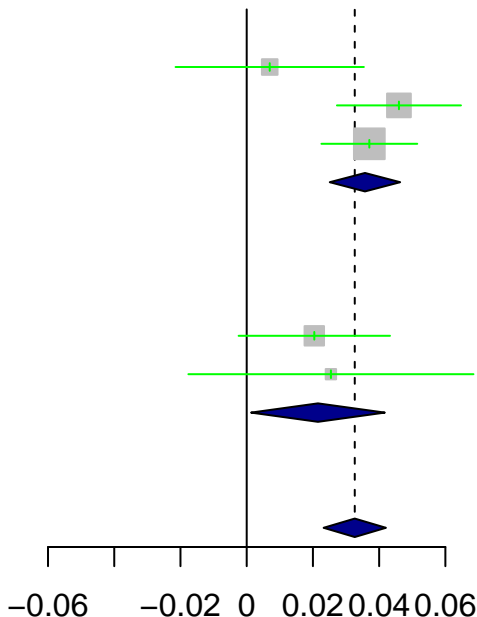

rs687891 (G)

BETA

BETA

95%-CI

P-value

**Discovery**

UKBB

FinnGen

23andMe

**Fixed effects model**

$I^2 = 17\%$

**Replication**

IHGC16noFIno23

HUNT

**Fixed effects model**

$I^2 = 0\%$

**Fixed effects model**

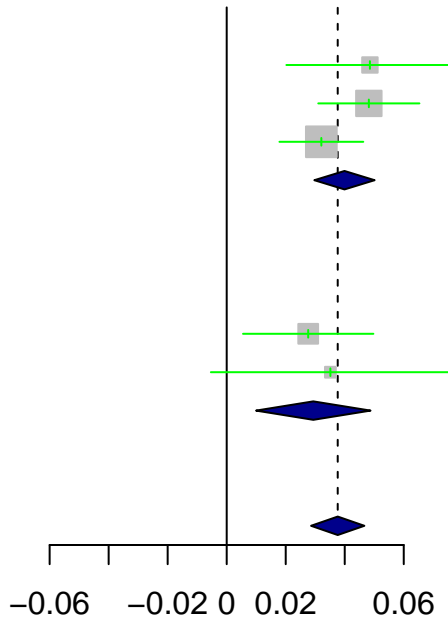

0.05 [ 0.02; 0.08]

0.05 [ 0.03; 0.07]

0.03 [ 0.02; 0.05]

**0.04 [ 0.03; 0.05] 1.85e-14**

0.03 [ 0.01; 0.05]

0.04 [-0.01; 0.08]

**0.03 [ 0.01; 0.05] 3.02e-03**

**0.04 [ 0.03; 0.05] 3.20e-16**

rs4814864 (C)

BETA

BETA

95%-CI

P-value

**Discovery**

UKBB

FinnGen

23andMe

**Fixed effects model**

$I^2 = 0\%$

**Replication**

IHGC16noFIno23

HUNT

**Fixed effects model**

$I^2 = 0\%$

**Fixed effects model**

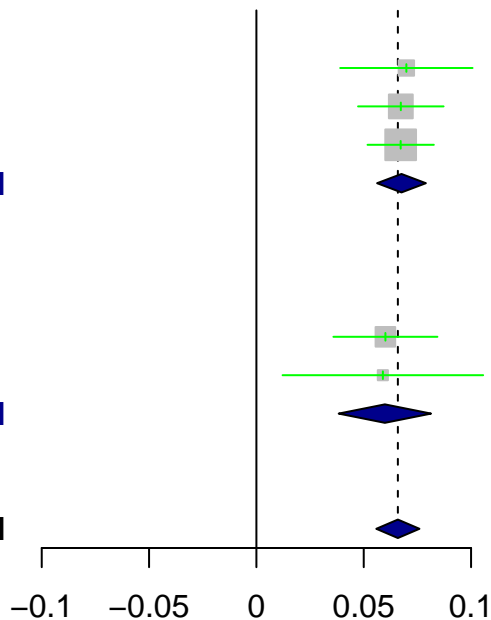

0.07 [0.04; 0.10]

0.07 [0.05; 0.09]

0.07 [0.05; 0.08]

**0.07 [0.06; 0.08] 1.96e-31**

0.06 [0.04; 0.08]

0.06 [0.01; 0.11]

**0.06 [0.04; 0.08] 4.99e-08**

**0.07 [0.06; 0.08] 7.00e-38**

rs6058750 (C)

BETA

BETA

95%-CI

P-value

**Discovery**

UKBB

FinnGen

23andMe

**Fixed effects model**

$I^2 = 0\%$

**Replication**

IHGC16noFIno23

HUNT

**Fixed effects model**

$I^2 = 0\%$

**Fixed effects model**

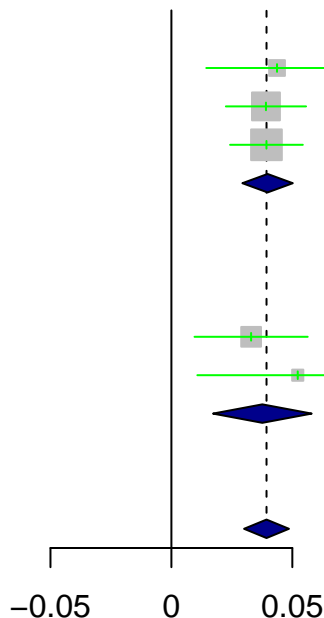

rs910187 (G)

BETA

BETA

95%-CI

P-value

**Discovery**

UKBB

FinnGen

23andMe

**Fixed effects model**

$I^2 = 46\%$

**Replication**

IHGC16noFIno23

HUNT

**Fixed effects model**

$I^2 = 0\%$

**Fixed effects model**

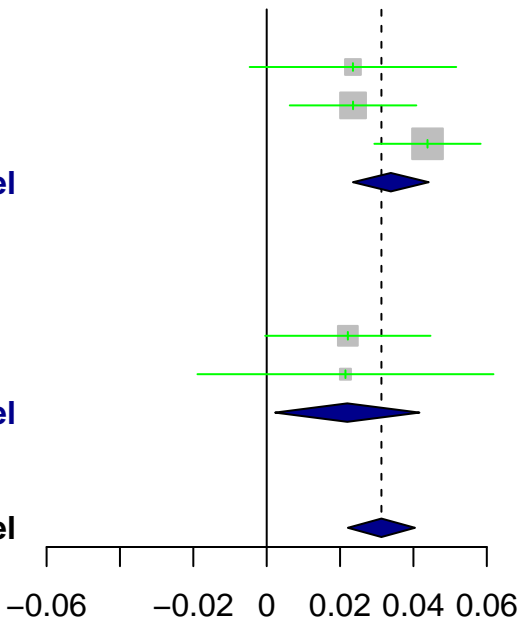

rs28451064 (G)

BETA

BETA

95%-CI

P-value

**Discovery**

UKBB

FinnGen

23andMe

**Fixed effects model**

$I^2 = 69\%$

**Replication**

IHGC16noFIno23

HUNT

**Fixed effects model**

$I^2 = 47\%$

**Fixed effects model**

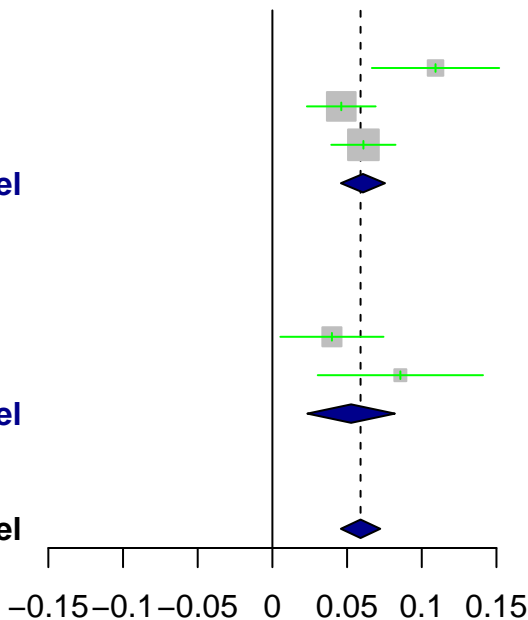

0.11 [0.07; 0.15]

0.05 [0.02; 0.07]

0.06 [0.04; 0.08]

**0.06 [0.05; 0.08] 7.94e-16**

0.04 [0.01; 0.07]

0.09 [0.03; 0.14]

**0.05 [0.02; 0.08] 4.21e-04**

**0.06 [0.05; 0.07] 1.55e-18**

rs13048635 (T)

BETA

BETA

95%-CI

P-value

**Discovery**

UKBB

FinnGen

23andMe

**Fixed effects model**

$I^2 = 47\%$

**Replication**

IHGC16noFIno23

HUNT

**Fixed effects model**

$I^2 = 0\%$

**Fixed effects model**

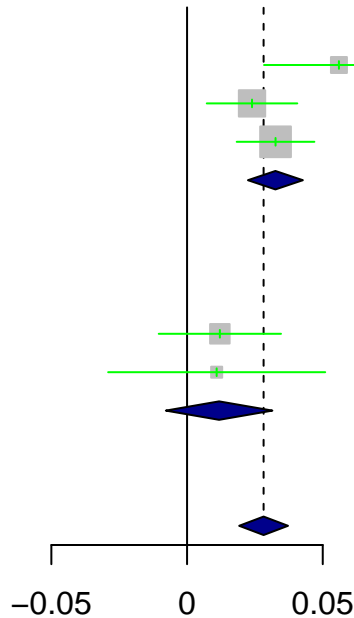

0.06 [0.03; 0.08]

0.02 [0.01; 0.04]

0.03 [0.02; 0.05]

**0.03 [0.02; 0.04] 2.86e-10**

0.01 [-0.01; 0.03]

0.01 [-0.03; 0.05]

**0.01 [-0.01; 0.03] 2.38e-01**

**0.03 [0.02; 0.04] 7.72e-10**

rs2234052 (G)

BETA

BETA

95%-CI

P-value

**Discovery**

UKBB

FinnGen

23andMe

**Fixed effects model**

$I^2 = 0\%$

**Replication**

IHGC16noFIno23

HUNT

**Fixed effects model**

$I^2 = 0\%$

**Fixed effects model**

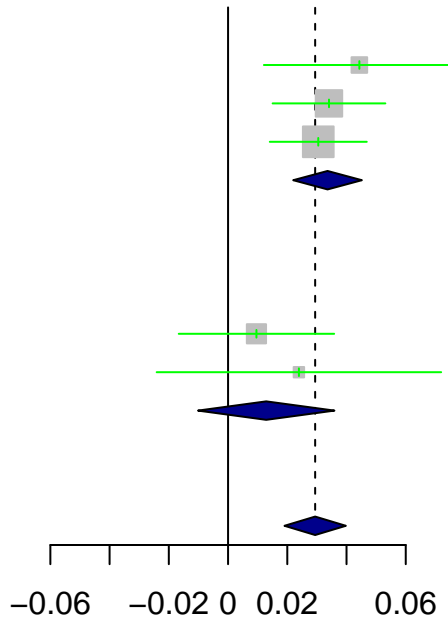

0.04 [0.01; 0.08]

0.03 [0.02; 0.05]

0.03 [0.01; 0.05]

**0.03 [0.02; 0.05] 1.36e-08**

0.01 [-0.02; 0.04]

0.02 [-0.02; 0.07]

**0.01 [-0.01; 0.04] 2.73e-01**

**0.03 [0.02; 0.04] 2.56e-08**



rs141478056 (G)

BETA

BETA

95%-CI

P-value

**Discovery**

UKBB

FinnGen

23andMe

**Fixed effects model**

$r^2 = 69\%$

**Replication**

IHGC16noFIno23

HUNT

**Fixed effects model**

$r^2 = 0\%$

**Fixed effects model**

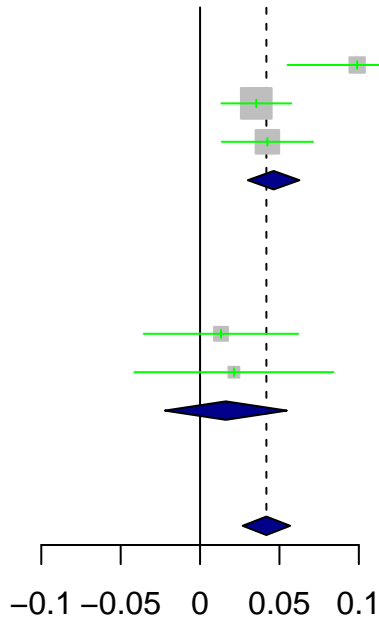

rs149675702 (C)

BETA

BETA

95%-CI

P-value

**Discovery**

UKBB

FinnGen

23andMe

**Fixed effects model**

$I^2 = 0\%$

**Replication**

IHGC16noFIno23

HUNT

**Fixed effects model**

$I^2 = 0\%$

**Fixed effects model**

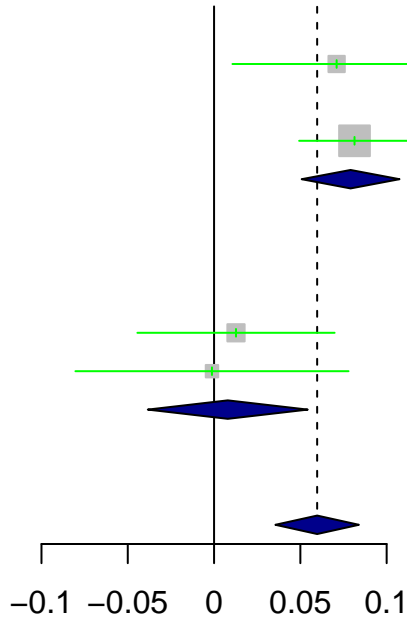

0.07 [ 0.01; 0.13]

0.08 [ 0.05; 0.11]

**0.08 [ 0.05; 0.11] 4.56e-08**

0.01 [-0.04; 0.07]

-0.00 [-0.08; 0.08]

**0.01 [-0.04; 0.05] 7.37e-01**

**0.06 [ 0.04; 0.08] 1.28e-06**
