# Supplementary material for: Fine-mapping a genome-wide meta-analysis of 98,374 migraine cases identifies 181 sets of candidate causal variants
Source: PubMed Central journal article supplement (PMC11451805; doi:10.1101/2024.05.20.24307608), 2024-05-20
Supplement: media-4.pdf [file media-4.pdf]

## FinnGen Banner

| Full Name               | Affiliation                                                                                                  | E-mail                                    | Role 1               | Role 2                            |
|-------------------------|--------------------------------------------------------------------------------------------------------------|-------------------------------------------|----------------------|-----------------------------------|
| Aarno Palotie           | Institute for Molecular Medicine Finland (FIMM), HILIFE, University of Helsinki, Helsinki, Finland           | aarno.palotie@helsinki.fi                 | Steering Committee   | Steering Committee                |
| Mark Daly               | Institute for Molecular Medicine Finland (FIMM), HILIFE, University of Helsinki, Helsinki, Finland           | mark.daly@helsinki.fi                     | Steering Committee   | Steering Committee                |
| Bridget Riley-Gillis    | Abbvie, Chicago, IL, United States                                                                           | bridget.rileygillis@abbvie.com            | Steering Committee   | Pharmaceutical companies          |
| Howard Jacob            | Abbvie, Chicago, IL, United States                                                                           | howard.jacob@abbvie.com                   | Steering Committee   | Pharmaceutical companies          |
| Dirk Paul               | Astra Zeneca, Cambridge, United Kingdom                                                                      | dirk.paul@astrazeneca.com                 | Steering Committee   | Pharmaceutical companies          |
| Slavé Petrovski         | Astra Zeneca, Cambridge, United Kingdom                                                                      | slav.petrovski@astrazeneca.com            | Steering Committee   | Pharmaceutical companies          |
| Heiko Runz              | Biogen, Cambridge, MA, United States                                                                         | heiko.runz@biogen.com                     | Steering Committee   | Pharmaceutical companies          |
| Sally John              | Biogen, Cambridge, MA, United States                                                                         | sally.john@biogen.com                     | Steering Committee   | Pharmaceutical companies          |
| George Okafo            | Boehringer Ingelheim, Ingelheim am Rhein, Germany                                                            | george.okafo@boehringer-ingenheim.com     | Steering Committee   | Pharmaceutical companies          |
| Robert Plenge           | Bristol Myers Squibb, New York, NY, United States                                                            | robert.plenge@bms.com                     | Steering Committee   | Pharmaceutical companies          |
| Joseph Maranville       | Bristol Myers Squibb, New York, NY, United States                                                            | joseph.maranville@bms.com                 | Steering Committee   | Pharmaceutical companies          |
| Mark McCarthy           | Genentech, San Francisco, CA, United States                                                                  | mccarthy.mark@gene.com                    | Steering Committee   | Pharmaceutical companies          |
| Margaret G. Ehm         | GlaxoSmithKline, Collegeville, PA, United States                                                             | meg.g.ehm@gsk.com                         | Steering Committee   | Pharmaceutical companies          |
| Kirsi Auro              | GlaxoSmithKline, Espoo, Finland                                                                              | kirsi.m.auro@gsk.com                      | Steering Committee   | Pharmaceutical companies          |
| Simonne Longerich       | Merck, Kenilworth, NJ, United States                                                                         | simonne.longerich@merck.com               | Steering Committee   | Pharmaceutical companies          |
| Anders Mälärstig        | Pfizer, New York, NY, United States                                                                          | anders.malarstig@pfizer.com               | Steering Committee   | Pharmaceutical companies          |
| Katherine Klinger       | Translational Sciences, Sanofi R&D, Framingham, MA, USA                                                      | katherine.klinger@sanofi.com              | Steering Committee   | Pharmaceutical companies          |
| Clement Chatelain       | Translational Sciences, Sanofi R&D, Framingham, MA, USA                                                      | clement.chatelain@sanofi.com              | Steering Committee   | Pharmaceutical companies          |
| Matthias Gossel         | Translational Sciences, Sanofi R&D, Framingham, MA, USA                                                      | matthias.gossel@sanofi.com                | Steering Committee   | Pharmaceutical companies          |
| Karol Estrada           | Maze Therapeutics, San Francisco, CA, United States                                                          | kestrada@mazetx.com                       | Steering Committee   | Pharmaceutical companies          |
| Robert Graham           | Maze Therapeutics, San Francisco, CA, United States                                                          | rgraham@mazetx.com                        | Steering Committee   | Pharmaceutical companies          |
| Dawn Waterworth         | Janssen Research & Development, LLC, Spring House, PA, United States                                         | dwaterwo@its.jnj.com                      | Steering Committee   | Pharmaceutical companies          |
| Chris O'Donnell         | Novartis Institutes for BioMedical Research, Cambridge, MA, United States                                    | chris.odonnell@novartis.com               | Steering Committee   | Pharmaceutical companies          |
| Nicole Renaud           | Novartis Institutes for BioMedical Research, Cambridge, MA, United States                                    | nicole.renaud@novartis.com                | Steering Committee   | Pharmaceutical companies          |
| Tomi P. Mäkelä          | HILIFE, University of Helsinki, Finland, Finland                                                             | tomi.makela@helsinki.fi                   | Steering Committee   | University of Helsinki & Biobanks |
| Jaakko Kaprio           | Institute for Molecular Medicine Finland (FIMM), HILIFE, University of Helsinki, Helsinki, Finland           | jaakko.kaprio@helsinki.fi                 | Steering Committee   | University of Helsinki & Biobanks |
| Petri Virolainen        | Auria Biobank / University of Turku / Hospital District of Southwest Finland, Turku, Finland                 | petri.virolainen@tyks.fi                  | Steering Committee   | University of Helsinki & Biobanks |
| Antti Hakanen           | Auria Biobank / University of Turku / Hospital District of Southwest Finland, Turku, Finland                 | antti.hakanen@tyks.fi                     | Steering Committee   | University of Helsinki & Biobanks |
| Terhi Kilpi             | THL Biobank / Finnish Institute for Health and Welfare (THL), Helsinki, Finland                              | terhi.kilpi@thl.fi                        | Steering Committee   | University of Helsinki & Biobanks |
| Markus Perola           | THL Biobank / Finnish Institute for Health and Welfare (THL), Helsinki, Finland                              | markus.perola@thl.fi                      | Steering Committee   | University of Helsinki & Biobanks |
| Jukka Partanen          | Finnish Red Cross Blood Service / Finnish Hematology Registry and Clinical Biobank, Helsinki, Finland        | jukka.partanen@veripalvelu.fi             | Steering Committee   | University of Helsinki & Biobanks |
| Anne Pitkäranta         | Helsinki Biobank / Helsinki University and Hospital District of Helsinki and Uusimaa, Helsinki, Finland      | anne.pitkaranta@hus.fi                    | Steering Committee   | University of Helsinki & Biobanks |
| Taneli Raivio           | Helsinki Biobank / Helsinki University and Hospital District of Helsinki and Uusimaa, Helsinki, Finland      | taneli.raivio@hus.fi                      | Steering Committee   | University of Helsinki & Biobanks |
| Jari Tikkanen           | Northern Finland Biobank Borealis / University of Oulu / Northern Ostrobothnia Hospital, Oulu, Finland       | jari.tikkanen@ppshp.fi                    | Steering Committee   | University of Helsinki & Biobanks |
| Raisa Serpi             | Northern Finland Biobank Borealis / University of Oulu / Northern Ostrobothnia Hospital, Oulu, Finland       | raisa.serpi@ppshp.fi                      | Steering Committee   | University of Helsinki & Biobanks |
| Tarja Laitinen          | Finnish Clinical Biobank Tampere / University of Tampere / Pirkanmaa Hospital District, Tampere, Finland     | tarja.laitinen@pshp.fi                    | Steering Committee   | University of Helsinki & Biobanks |
| Veli-Matti Kosma        | Biobank of Eastern Finland / University of Eastern Finland / Northern Savo Hospital, Rovaniemi, Finland      | veli-matti.kosma@uef.fi                   | Steering Committee   | University of Helsinki & Biobanks |
| Jari Laukkanen          | Central Finland Biobank / University of Jyväskylä / Central Finland Health Care District, Jyväskylä, Finland | jari.laukkanen@ksshp.fi                   | Steering Committee   | University of Helsinki & Biobanks |
| Marco Hautalahti        | FINBB - Finnish biobank cooperative, Jyväskylä, Finland                                                      | marco.hautalahti@finbb.fi                 | Steering Committee   | University of Helsinki & Biobanks |
| Outu Tuovila            | Business Finland, Helsinki, Finland                                                                          | outu.tuovila@businessfinland.fi           | Steering Committee   | Other Experts/ Non-Voting Members |
| Raimo Pakkanen          | Business Finland, Helsinki, Finland                                                                          | raimo.pakkanen@businessfinland.fi         | Steering Committee   | Other Experts/ Non-Voting Members |
| Jeffrey Waring          | Abbvie, Chicago, IL, United States                                                                           | jeff.waring@abbvie.com                    | Scientific Committee | Pharmaceutical companies          |
| Bridget Riley-Gillis    | Abbvie, Chicago, IL, United States                                                                           | bridget.rileygillis@abbvie.com            | Scientific Committee | Pharmaceutical companies          |
| Fedik Rahimov           | Abbvie, Chicago, IL, United States                                                                           | fedik.rahimov@abbvie.com                  | Scientific Committee | Pharmaceutical companies          |
| Ioanna Tachmazidou      | Astra Zeneca, Cambridge, United Kingdom                                                                      | ioanna.tachmazidou@astrazeneca.com        | Scientific Committee | Pharmaceutical companies          |
| Chia-Yen Chen           | Biogen, Cambridge, MA, United States                                                                         | chiayen.chen@biogen.com                   | Scientific Committee | Pharmaceutical companies          |
| Heiko Runz              | Biogen, Cambridge, MA, United States                                                                         | heiko.runz@biogen.com                     | Scientific Committee | Pharmaceutical companies          |
| Zhihao Ding             | Boehringer Ingelheim, Ingelheim am Rhein, Germany                                                            | zhihao.ding@boehringer-ingenheim.com      | Scientific Committee | Pharmaceutical companies          |
| Marc Jung               | Boehringer Ingelheim, Ingelheim am Rhein, Germany                                                            | marc_oliver.jung@boehringer-ingenheim.com | Scientific Committee | Pharmaceutical companies          |
| Hanati Tuoken           | Boehringer Ingelheim, Ingelheim am Rhein, Germany                                                            | hanati.tuoken@boehringer-ingenheim.com    | Scientific Committee | Pharmaceutical companies          |
| Shameek Biswas          | Bristol Myers Squibb, New York, NY, United States                                                            | Shameek.Biswas@bms.com                    | Scientific Committee | Pharmaceutical companies          |
| Rion Pendergrass        | Genentech, San Francisco, CA, United States                                                                  | penders2@gene.com                         | Scientific Committee | Pharmaceutical companies          |
| Margaret G. Ehm         | GlaxoSmithKline, Collegeville, PA, United States                                                             | meg.g.ehm@gsk.com                         | Scientific Committee | Pharmaceutical companies          |
| David Pulford           | GlaxoSmithKline, Stevenage, United Kingdom                                                                   | david.pulford@gsk.com                     | Scientific Committee | Pharmaceutical companies          |
| Neha Raghavan           | Merck, Kenilworth, NJ, United States                                                                         | neha.raghavan@merck.com                   | Scientific Committee | Pharmaceutical companies          |
| Adriana Huertas-Vazquez | Merck, Kenilworth, NJ, United States                                                                         | adriana.huertas.vazquez@merck.com         | Scientific Committee | Pharmaceutical companies          |
| Jae-Hoon Sul            | Merck, Kenilworth, NJ, United States                                                                         | jae.hoon.sul@merck.com                    | Scientific Committee | Pharmaceutical companies          |
| Anders Mälärstig        | Pfizer, New York, NY, United States                                                                          | anders.malarstig@pfizer.com               | Scientific Committee | Pharmaceutical companies          |
| Xinli Hu                | Pfizer, New York, NY, United States                                                                          | xinli.hu@pfizer.com                       | Scientific Committee | Pharmaceutical companies          |
| Åsa Hedman              | Pfizer, New York, NY, United States                                                                          | asa.hedman@pfizer.com                     | Scientific Committee | Pharmaceutical companies          |
| Katherine Klinger       | Translational Sciences, Sanofi R&D, Framingham, MA, USA                                                      | katherine.klinger@sanofi.com              | Scientific Committee | Pharmaceutical companies          |
| Robert Graham           | Maze Therapeutics, San Francisco, CA, United States                                                          | rgraham@mazetx.com                        | Scientific Committee | Pharmaceutical companies          |
| Manuel Rivas            | Maze Therapeutics, San Francisco, CA, United States                                                          | mrvivas@mazetx.com                        | Scientific Committee | Pharmaceutical companies          |
| Dawn Waterworth         | Janssen Research & Development, LLC, Spring House, PA, United States                                         | dwaterwo@its.jnj.com                      | Scientific Committee | Pharmaceutical companies          |
| Nicole Renaud           | Novartis Institutes for BioMedical Research, Cambridge, MA, United States                                    | nicole.renaud@novartis.com                | Scientific Committee | Pharmaceutical companies          |
| Ma'en Obeidat           | Novartis Institutes for BioMedical Research, Cambridge, MA, United States                                    | maen.obeidat@novartis.com                 | Scientific Committee | Pharmaceutical companies          |
| Jonathan Chung          | Novartis Institutes for BioMedical Research, Cambridge, MA, United States                                    | jonathan.chung@novartis.com               | Scientific Committee | Pharmaceutical companies          |
| Jonas Zierer            | Novartis Institutes for BioMedical Research, Cambridge, MA, United States                                    | jonas.zierer@novartis.com                 | Scientific Committee | Pharmaceutical companies          |
| Mari Niemi              | Novartis Institutes for BioMedical Research, Cambridge, MA, United States                                    | mari.niemi@novartis.com                   | Scientific Committee | Pharmaceutical companies          |
| Samuli Ripatti          | Institute for Molecular Medicine Finland (FIMM), HILIFE, University of Helsinki, Helsinki, Finland           | samuli.ripatti@helsinki.fi                | Scientific Committee | University of Helsinki & Biobanks |
| Johanna Schleutker      | Auria Biobank / Univ. of Turku / Hospital District of Southwest Finland, Turku, Finland                      | johanna.schleutker@utu.fi                 | Scientific Committee | University of Helsinki & Biobanks |
| Markus Perola           | THL Biobank / Finnish Institute for Health and Welfare (THL), Helsinki, Finland                              | markus.perola@thl.fi                      | Scientific Committee | University of Helsinki & Biobanks |
| Mikko Arvas             | Finnish Red Cross Blood Service / Finnish Hematology Registry and Clinical Biobank, Helsinki, Finland        | mikko.arvas@veripalvelu.fi                | Scientific Committee | University of Helsinki & Biobanks |
| Olli Carpen             | Helsinki Biobank / Helsinki University and Hospital District of Helsinki and Uusimaa, Helsinki, Finland      | olli.carpen@helsinki.fi                   | Scientific Committee | University of Helsinki & Biobanks |
| Reetta Hinttala         | Northern Finland Biobank Borealis / University of Oulu / Northern Ostrobothnia Hospital, Oulu, Finland       | reetta.hinttala@oulu.fi                   | Scientific Committee | University of Helsinki & Biobanks |
| Johannes Kettunen       | Northern Finland Biobank Borealis / University of Oulu / Northern Ostrobothnia Hospital, Oulu, Finland       | johannes.kettunen@oulu.fi                 | Scientific Committee | University of Helsinki & Biobanks |
| Arto Mannermaa          | Biobank of Eastern Finland / University of Eastern Finland / Northern Savo Hospital, Rovaniemi, Finland      | arto.mannermaa@uef.fi                     | Scientific Committee | University of Helsinki & Biobanks |
| Katrina Aalto-Setälä    | Faculty of Medicine and Health Technology, Tampere University, Tampere, Finland                              | katrina.aalto-setala@tuni.fi              | Scientific Committee | University of Helsinki & Biobanks |
| Mika Kahönen            | Finnish Clinical Biobank Tampere / University of Tampere / Pirkanmaa Hospital District, Tampere, Finland     | mika.kahonen@uta.fi                       | Scientific Committee | University of Helsinki & Biobanks |
| Jari Laukkanen          | Central Finland Biobank / University of Jyväskylä / Central Finland Health Care District, Jyväskylä, Finland | jari.laukkanen@ksshp.fi                   | Scientific Committee | University of Helsinki & Biobanks |
| Johanna Mäkelä          | FINBB - Finnish biobank cooperative, Jyväskylä, Finland                                                      | johanna.makela@finbb.fi                   | Clinical Groups      | Neurology Group                   |
| Reetta Kälväinen        | Northern Savo Hospital District, Kuopio, Finland                                                             | reetta.kalviainen@kuh.fi                  | Clinical Groups      | Neurology Group                   |
| Valtteri Julkunen       | Northern Savo Hospital District, Kuopio, Finland                                                             | valtteri.julkunen@kuh.fi                  | Clinical Groups      | Neurology Group                   |
| Hilkka Soinen           | Northern Savo Hospital District, Kuopio, Finland                                                             | hilkka.soininen@uef.fi                    | Clinical Groups      | Neurology Group                   |
| Anne Remes              | Northern Ostrobothnia Hospital District, Oulu, Finland                                                       | anne.remes@oulu.fi                        | Clinical Groups      | Neurology Group                   |
| Mikko Hiltunen          | University of Eastern Finland, Kuopio, Finland                                                               | mikko.hiltunen@uef.fi                     | Clinical Groups      | Neurology Group                   |
| Jukka Peltola           | Pirkanmaa Hospital District, Tampere, Finland                                                                | jukka.peltola@pshp.fi                     | Clinical Groups      | Neurology Group                   |
| Minna Raivio            | Hospital District of Helsinki and Uusimaa, Helsinki, Finland                                                 | minna.raivio@geri.fi                      | Clinical Groups      | Neurology Group                   |
| Pentti Tienari          | Hospital District of Helsinki and Uusimaa, Helsinki, Finland                                                 | pentti.tienari@hus.fi                     | Clinical Groups      | Neurology Group                   |
| Juha Rinne              | Hospital District of Southwest Finland, Turku, Finland                                                       | juha.rinne@tyks.fi                        | Clinical Groups      | Neurology Group                   |
| Roosa Kallionpää        | Hospital District of Southwest Finland, Turku, Finland                                                       | roosa.kallionpaa@tyks.fi                  | Clinical Groups      | Neurology Group                   |
| Julia Partanen          | Institute for Molecular Medicine Finland, HILIFE, University of Helsinki, Finland                            | juulia.partanen@helsinki.fi               | Clinical Groups      | Neurology Group                   |
| Adam Ziemann            | Abbvie, Chicago, IL, United States                                                                           | adam.ziemann@abbvie.com                   | Clinical Groups      | Neurology Group                   |
| Nizar Smaoui            | Abbvie, Chicago, IL, United States                                                                           | nizar.smaoui@abbvie.com                   | Clinical Groups      | Neurology Group                   |
| Anne Lehtonen           | Abbvie, Chicago, IL, United States                                                                           | anne.lehtonen@abbvie.com                  | Clinical Groups      | Neurology Group                   |
| Susan Eaton             | Biogen, Cambridge, MA, United States                                                                         | susan.eaton@biogen.com                    | Clinical Groups      | Neurology Group                   |
| Heiko Runz              | Biogen, Cambridge, MA, United States                                                                         | heiko.runz@biogen.com                     | Clinical Groups      | Neurology Group                   |
| Sanni Lahdenperä        | Biogen, Cambridge, MA, United States                                                                         | sanni.lahdenpera@biogen.com               | Clinical Groups      | Neurology Group                   |
| Shameek Biswas          | Bristol Myers Squibb, New York, NY, United States                                                            | shameek.biswas@bms.com                    | Clinical Groups      | Neurology Group                   |
| Natalie Bowers          | Genentech, San Francisco, CA, United States                                                                  | bower1@gene.com                           | Clinical Groups      | Neurology Group                   |
| Edmond Teng             | Genentech, San Francisco, CA, United States                                                                  | teng.edmond@gene.com                      | Clinical Groups      | Neurology Group                   |
| Rion Pendergrass        | Genentech, San Francisco, CA, United States                                                                  | penders2@gene.com                         | Clinical Groups      | Neurology Group                   |

|                          |                                                                                                                                                                                             |                                             |                 |                                |
|--------------------------|---------------------------------------------------------------------------------------------------------------------------------------------------------------------------------------------|---------------------------------------------|-----------------|--------------------------------|
| Fani Xu                  | GlaxoSmithKline, Brentford, United Kingdom                                                                                                                                                  | chun-fang.2.xu@gsk.com                      | Clinical Groups | Neurology Group                |
| David Pulford            | GlaxoSmithKline, Stevenage, United Kingdom                                                                                                                                                  | david.x.pulford@gsk.com                     | Clinical Groups | Neurology Group                |
| Kirsi Auro               | GlaxoSmithKline, Espoo, Finland                                                                                                                                                             | kirsi.m.auro@gsk.com                        | Clinical Groups | Neurology Group                |
| Laura Addis              | GlaxoSmithKline, Brentford, United Kingdom                                                                                                                                                  | laura.a.addis@gsk.com                       | Clinical Groups | Neurology Group                |
| John Eicher              | GlaxoSmithKline, Brentford, United Kingdom                                                                                                                                                  | john.d.eicher@gsk.com                       | Clinical Groups | Neurology Group                |
| Qingqin S Li             | Janssen Research & Development, LLC, Titusville, NJ 08560, United States                                                                                                                    | QLI2@its.jnj.com                            | Clinical Groups | Neurology Group                |
| Karen He                 | Janssen Research & Development, LLC, Spring House, PA, United States                                                                                                                        | khe2@its.jnj.com                            | Clinical Groups | Neurology Group                |
| Ekatarina Khrantsova     | Janssen Research & Development, LLC, Spring House, PA, United States                                                                                                                        | ekhramts@its.jnj.com                        | Clinical Groups | Neurology Group                |
| Neha Raghavan            | Merck, Kenilworth, NJ, United States                                                                                                                                                        | neha.raghavan@merck.com                     | Clinical Groups | Neurology Group                |
| Martti Färkkilä          | Hospital District of Helsinki and Uusimaa, Helsinki, Finland                                                                                                                                | martti.farkkila@hus.fi                      | Clinical Groups | Gastroenterology Group         |
| Jukka Koskela            | Hospital District of Helsinki and Uusimaa, Helsinki, Finland                                                                                                                                | jukka.koskela@helsinki.fi                   | Clinical Groups | Gastroenterology Group         |
| Sampa Pikkarainen        | Hospital District of Helsinki and Uusimaa, Helsinki, Finland                                                                                                                                | sampa.pikkarainen@hus.fi                    | Clinical Groups | Gastroenterology Group         |
| Airi Jussila             | Pirkanmaa Hospital District, Tampere, Finland                                                                                                                                               | airi.jussila@pshp.fi                        | Clinical Groups | Gastroenterology Group         |
| Katri Kaukinen           | Pirkanmaa Hospital District, Tampere, Finland                                                                                                                                               | katri.kaukinen@tuni.fi                      | Clinical Groups | Gastroenterology Group         |
| Timo Blomster            | Northern Ostrobothnia Hospital District, Oulu, Finland                                                                                                                                      | timo.blomster@ppshp.fi                      | Clinical Groups | Gastroenterology Group         |
| Mikko Kiviniemi          | Northern Savo Hospital District, Kuopio, Finland                                                                                                                                            | mikko.kiviniemi@kuh.fi                      | Clinical Groups | Gastroenterology Group         |
| Markku Voutilainen       | Hospital District of Southwest Finland, Turku, Finland                                                                                                                                      | markku.voutilainen@tyks.fi                  | Clinical Groups | Gastroenterology Group         |
| Mark Daly                | Institute for Molecular Medicine, Finland (FIMM), HiLIFE, University of Helsinki, Helsinki, Finland; Broad Institute of MIT and Harvard; Massachusetts General Hospital                     | mark.daly@helsinki.fi                       | Clinical Groups | Gastroenterology Group         |
| Jeffrey Waring           | Abbvie, Chicago, IL, United States                                                                                                                                                          | jeff.waring@abbvie.com                      | Clinical Groups | Gastroenterology Group         |
| Nizar Smaoui             | Abbvie, Chicago, IL, United States                                                                                                                                                          | nizar.smaoui@abbvie.com                     | Clinical Groups | Gastroenterology Group         |
| Fedik Rahimov            | Abbvie, Chicago, IL, United States                                                                                                                                                          | fedik.rahimov@abbvie.com                    | Clinical Groups | Gastroenterology Group         |
| Anne Lehtonen            | Abbvie, Chicago, IL, United States                                                                                                                                                          | anne.lehtonen@abbvie.com                    | Clinical Groups | Gastroenterology Group         |
| Tim Lu                   | Genentech, San Francisco, CA, United States                                                                                                                                                 | lut8@gene.com                               | Clinical Groups | Gastroenterology Group         |
| Natalie Bowers           | Genentech, San Francisco, CA, United States                                                                                                                                                 | bowersn1@gene.com                           | Clinical Groups | Gastroenterology Group         |
| Rion Pendergrass         | Genentech, San Francisco, CA, United States                                                                                                                                                 | penders2@gene.com                           | Clinical Groups | Gastroenterology Group         |
| Linda McCarthy           | GlaxoSmithKline, Brentford, United Kingdom                                                                                                                                                  | linda.c.mccarthy@gsk.com                    | Clinical Groups | Gastroenterology Group         |
| Amy Hart                 | Janssen Research & Development, LLC, Spring House, PA, United States                                                                                                                        | ahart13@its.jnj.com                         | Clinical Groups | Gastroenterology Group         |
| Meijian Guan             | Janssen Research & Development, LLC, Spring House, PA, United States                                                                                                                        | mguan4@its.jnj.com                          | Clinical Groups | Gastroenterology Group         |
| Jason Miller             | Merck, Kenilworth, NJ, United States                                                                                                                                                        | jason.miller4@merck.com                     | Clinical Groups | Gastroenterology Group         |
| Kirsi Kalpala            | Pfizer, New York, NY, United States                                                                                                                                                         | kirsi.kalpala@pfizer.com                    | Clinical Groups | Gastroenterology Group         |
| Melissa Miller           | Pfizer, New York, NY, United States                                                                                                                                                         | melissa.r.miller@pfizer.com                 | Clinical Groups | Gastroenterology Group         |
| Xinli Hu                 | Pfizer, New York, NY, United States                                                                                                                                                         | xinli.hu@pfizer.com                         | Clinical Groups | Gastroenterology Group         |
| Kari Eklund              | Hospital District of Helsinki and Uusimaa, Helsinki, Finland                                                                                                                                | kari.eklund@hus.fi                          | Clinical Groups | Rheumatology Group             |
| Antti Palomäki           | Hospital District of Southwest Finland, Turku, Finland                                                                                                                                      | apalo@utu.fi                                | Clinical Groups | Rheumatology Group             |
| Pia Isomäki              | Pirkanmaa Hospital District, Tampere, Finland                                                                                                                                               | pia.isomaki@pshp.fi                         | Clinical Groups | Rheumatology Group             |
| Laura Pirilä             | Hospital District of Southwest Finland, Turku, Finland                                                                                                                                      | laura.pirila@finnet.fi;laura.pirila@tyks.fi | Clinical Groups | Rheumatology Group             |
| Oili Kaipiaisen-Seppänen | Northern Savo Hospital District, Kuopio, Finland                                                                                                                                            | oili.kaipiaisen-seppanen@kuh.fi             | Clinical Groups | Rheumatology Group             |
| Johanna Huhtakangas      | Northern Ostrobothnia Hospital District, Oulu, Finland                                                                                                                                      | johanna.huhtakangas@kuh.fi                  | Clinical Groups | Rheumatology Group             |
| Nina Mars                | Institute for Molecular Medicine Finland (FIMM), HiLIFE, University of Helsinki, Helsinki, Finland                                                                                          | nina.mars@helsinki.fi                       | Clinical Groups | Rheumatology Group             |
| Jeffrey Waring           | Abbvie, Chicago, IL, United States                                                                                                                                                          | jeff.waring@abbvie.com                      | Clinical Groups | Rheumatology Group             |
| Fedik Rahimov            | Abbvie, Chicago, IL, United States                                                                                                                                                          | fedik.rahimov@abbvie.com                    | Clinical Groups | Rheumatology Group             |
| Apinya Lertratanakul     | Abbvie, Chicago, IL, United States                                                                                                                                                          | apinya.lertratanakul@abbvie.com             | Clinical Groups | Rheumatology Group             |
| Nizar Smaoui             | Abbvie, Chicago, IL, United States                                                                                                                                                          | nizar.smaoui@abbvie.com                     | Clinical Groups | Rheumatology Group             |
| Anne Lehtonen            | Abbvie, Chicago, IL, United States                                                                                                                                                          | anne.lehtonen@abbvie.com                    | Clinical Groups | Rheumatology Group             |
| Coralie Violette         | AstraZeneca, Cambridge, United Kingdom                                                                                                                                                      | coralie.violette@astrazeneca.com            | Clinical Groups | Rheumatology Group             |
| Marla Hochfeld           | Bristol Myers Squibb, New York, NY, United States                                                                                                                                           | mhochfeld@celgene.com                       | Clinical Groups | Rheumatology Group             |
| Natalie Bowers           | Genentech, San Francisco, CA, United States                                                                                                                                                 | bowersn1@gene.com                           | Clinical Groups | Rheumatology Group             |
| Rion Pendergrass         | Genentech, San Francisco, CA, United States                                                                                                                                                 | penders2@gene.com                           | Clinical Groups | Rheumatology Group             |
| Jorge Esparza Gordillo   | GlaxoSmithKline, Brentford, United Kingdom                                                                                                                                                  | jorge.x.esparza-gordillo@gsk.com            | Clinical Groups | Rheumatology Group             |
| Kirsi Auro               | GlaxoSmithKline, Espoo, Finland                                                                                                                                                             | kirsi.m.auro@gsk.com                        | Clinical Groups | Rheumatology Group             |
| Dawn Waterworth          | Janssen Research & Development, LLC, Spring House, PA, United States                                                                                                                        | dwaterwo@its.jnj.com                        | Clinical Groups | Rheumatology Group             |
| Fabiana Farias           | Merck, Kenilworth, NJ, United States                                                                                                                                                        | fabiana.farias@merck.com                    | Clinical Groups | Rheumatology Group             |
| Kirsi Kalpala            | Pfizer, New York, NY, United States                                                                                                                                                         | kirsi.kalpala@pfizer.com                    | Clinical Groups | Rheumatology Group             |
| Nan Bing                 | Pfizer, New York, NY, United States                                                                                                                                                         | nan.bing@pfizer.com                         | Clinical Groups | Rheumatology Group             |
| Xinli Hu                 | Pfizer, New York, NY, United States                                                                                                                                                         | xinli.hu@pfizer.com                         | Clinical Groups | Rheumatology Group             |
| Tarja Laitinen           | Pirkanmaa Hospital District, Tampere, Finland                                                                                                                                               | tarja.laitinen@pshp.fi                      | Clinical Groups | Pulmonology Group              |
| Margit Pelkonen          | Northern Savo Hospital District, Kuopio, Finland                                                                                                                                            | margit.pelkonen@kuh.fi                      | Clinical Groups | Pulmonology Group              |
| Paula Kauppi             | Hospital District of Helsinki and Uusimaa, Helsinki, Finland                                                                                                                                | paula.kauppi@hus.fi                         | Clinical Groups | Pulmonology Group              |
| Hannu Kankaanranta       | University of Gothenburg, Gothenburg, Sweden/ Seinäjoki Central Hospital, Seinäjoki, Finland/ Tampere University, Tampere, Finland                                                          | hannu.kankaanranta@tuni.fi                  | Clinical Groups | Pulmonology Group              |
| Terttu Harju             | Northern Ostrobothnia Hospital District, Oulu, Finland                                                                                                                                      | terttu.harju@oulu.fi                        | Clinical Groups | Pulmonology Group              |
| Riitta Laheismaa         | Hospital District of Southwest Finland, Turku, Finland                                                                                                                                      | rihahes@utu.fi                              | Clinical Groups | Pulmonology Group              |
| Nizar Smaoui             | Abbvie, Chicago, IL, United States                                                                                                                                                          | nizar.smaoui@abbvie.com                     | Clinical Groups | Pulmonology Group              |
| Coralie Violette         | AstraZeneca, Cambridge, United Kingdom                                                                                                                                                      | coralie.violette@astrazeneca.com            | Clinical Groups | Pulmonology Group              |
| Susan Eaton              | Biocon, Cambridge, MA, United States                                                                                                                                                        | susan.eaton@biocon.com                      | Clinical Groups | Pulmonology Group              |
| Hubert Chen              | Genentech, San Francisco, CA, United States                                                                                                                                                 | chenh37@gene.com                            | Clinical Groups | Pulmonology Group              |
| Rion Pendergrass         | Genentech, San Francisco, CA, United States                                                                                                                                                 | penders2@gene.com                           | Clinical Groups | Pulmonology Group              |
| Natalie Bowers           | Genentech, San Francisco, CA, United States                                                                                                                                                 | bowersn1@gene.com                           | Clinical Groups | Pulmonology Group              |
| Joanna Betts             | GlaxoSmithKline, Brentford, United Kingdom                                                                                                                                                  | joanna.c.betts@gsk.com                      | Clinical Groups | Pulmonology Group              |
| Kirsi Auro               | GlaxoSmithKline, Espoo, Finland                                                                                                                                                             | kirsi.m.auro@gsk.com                        | Clinical Groups | Pulmonology Group              |
| Rajashree Mishra         | GlaxoSmithKline, Brentford, United Kingdom                                                                                                                                                  | rajashree.x.mishra@gsk.com                  | Clinical Groups | Pulmonology Group              |
| Majd Mouded              | Novartis, Basel, Switzerland                                                                                                                                                                | majd.mouded@novartis.com                    | Clinical Groups | Pulmonology Group              |
| Debby Ngo                | Novartis, Basel, Switzerland                                                                                                                                                                | debby.ngo@novartis.com                      | Clinical Groups | Pulmonology Group              |
| Teemu Niiranen           | Finnish Institute for Health and Welfare (THL), Helsinki, Finland                                                                                                                           | teemu.niiranen@thl.fi                       | Clinical Groups | Cardiometabolic Diseases Group |
| Felix Vaura              | Finnish Institute for Health and Welfare (THL), Helsinki, Finland                                                                                                                           | felix.vaura@thl.fi                          | Clinical Groups | Cardiometabolic Diseases Group |
| Veikko Salomaa           | Finnish Institute for Health and Welfare (THL), Helsinki, Finland                                                                                                                           | veikko.salomaa@thl.fi                       | Clinical Groups | Cardiometabolic Diseases Group |
| Kaj Metsärinne           | Hospital District of Southwest Finland, Turku, Finland                                                                                                                                      | kaj.metsarinne@tyks.fi                      | Clinical Groups | Cardiometabolic Diseases Group |
| Jenni Aittokallio        | Hospital District of Southwest Finland, Turku, Finland                                                                                                                                      | jematou@utu.fi                              | Clinical Groups | Cardiometabolic Diseases Group |
| Mika Kahönen             | Pirkanmaa Hospital District, Tampere, Finland                                                                                                                                               | mika.kahonen@uta.fi                         | Clinical Groups | Cardiometabolic Diseases Group |
| Jussi Hernesiemi         | Pirkanmaa Hospital District, Tampere, Finland                                                                                                                                               | jussi.hernesiemii@tuni.fi                   | Clinical Groups | Cardiometabolic Diseases Group |
| Daniel Gordin            | Hospital District of Helsinki and Uusimaa, Helsinki, Finland                                                                                                                                | daniel.gordin@hus.fi                        | Clinical Groups | Cardiometabolic Diseases Group |
| Juha Sinisalo            | Hospital District of Helsinki and Uusimaa, Helsinki, Finland                                                                                                                                | juha.sinisalo@hus.fi                        | Clinical Groups | Cardiometabolic Diseases Group |
| Marja-Riitta Taskinen    | Hospital District of Helsinki and Uusimaa, Helsinki, Finland                                                                                                                                | marja-riitta.taskinen@helsinki.fi           | Clinical Groups | Cardiometabolic Diseases Group |
| Tinamajia Tuomi          | Hospital District of Helsinki and Uusimaa, Helsinki, Finland                                                                                                                                | tinamajia.tuomi@hus.fi                      | Clinical Groups | Cardiometabolic Diseases Group |
| Timo Hiltunen            | Hospital District of Helsinki and Uusimaa, Helsinki, Finland                                                                                                                                | timo.hiltunen@hus.fi                        | Clinical Groups | Cardiometabolic Diseases Group |
| Jari Laukkanen           | Central Finland Health Care District, Jyväskylä, Finland                                                                                                                                    | jari.laukkanen@kshsp.fi                     | Clinical Groups | Cardiometabolic Diseases Group |
| Amanda Eliott            | Institute for Molecular Medicine Finland (FIMM), HiLIFE, University of Helsinki, Helsinki, Finland; Broad Institute, Cambridge, MA, USA and Massachusetts General Hospital, Boston, MA, USA | aelliott@broadinstitute.org                 | Clinical Groups | Cardiometabolic Diseases Group |
| Mary Pat Reeve           | Institute for Molecular Medicine Finland (FIMM), HiLIFE, University of Helsinki, Helsinki, Finland                                                                                          | mary.reeve@helsinki.fi                      | Clinical Groups | Cardiometabolic Diseases Group |
| Sanni Ruotsalainen       | Institute for Molecular Medicine Finland (FIMM), HiLIFE, University of Helsinki, Helsinki, Finland                                                                                          | sanni.ruotsalainen@helsinki.fi              | Clinical Groups | Cardiometabolic Diseases Group |
| Dirk Paul                | AstraZeneca, Cambridge, United Kingdom                                                                                                                                                      | dirk.paul@astrazeneca.com                   | Clinical Groups | Cardiometabolic Diseases Group |
| Natalie Bowers           | Genentech, San Francisco, CA, United States                                                                                                                                                 | bowersn1@gene.com                           | Clinical Groups | Cardiometabolic Diseases Group |
| Rion Pendergrass         | Genentech, San Francisco, CA, United States                                                                                                                                                 | penders2@gene.com                           | Clinical Groups | Cardiometabolic Diseases Group |
| Audrey Chu               | GlaxoSmithKline, Brentford, United Kingdom                                                                                                                                                  | audrey.v.chu@gsk.com                        | Clinical Groups | Cardiometabolic Diseases Group |
| Kirsi Auro               | GlaxoSmithKline, Espoo, Finland                                                                                                                                                             | kirsi.m.auro@gsk.com                        | Clinical Groups | Cardiometabolic Diseases Group |
| Dermot Reilly            | Janssen Research & Development, LLC, Boston, MA, United States                                                                                                                              | dreill11@its.jnj.com                        | Clinical Groups | Cardiometabolic Diseases Group |
| Mike Mendelson           | Novartis, Boston, MA, United States                                                                                                                                                         | mike.mendelson@novartis.com                 | Clinical Groups | Cardiometabolic Diseases Group |
| Jaakko Parkkinen         | Pfizer, New York, NY, United States                                                                                                                                                         | jaakko.parkkinen@pfizer.com                 | Clinical Groups | Cardiometabolic Diseases Group |
| Melissa Miller           | Pfizer, New York, NY, United States                                                                                                                                                         | melissa.r.miller@pfizer.com                 | Clinical Groups | Cardiometabolic Diseases Group |
| Tuomo MeroToja           | Hospital District of Helsinki and Uusimaa, Helsinki, Finland                                                                                                                                | tuomo.meretoja@hus.fi                       | Clinical Groups | Oncology Group                 |
| Heikki Joensuu           | Hospital District of Helsinki and Uusimaa, Helsinki, Finland                                                                                                                                | heikki.joensuu@hus.fi                       | Clinical Groups | Oncology Group                 |
| Olli Carpen              | Hospital District of Helsinki and Uusimaa, Helsinki, Finland                                                                                                                                | oili.carpen@helsinki.fi                     | Clinical Groups | Oncology Group                 |
| Johanna Mattson          | Hospital District of Helsinki and Uusimaa, Helsinki, Finland                                                                                                                                | johanna.mattson@hus.fi                      | Clinical Groups | Oncology Group                 |
| Eveliina Salminen        | Hospital District of Helsinki and Uusimaa, Helsinki, Finland                                                                                                                                | eveliina.e.salminen@hus.fi                  | Clinical Groups | Oncology Group                 |
| Annikka Auranen          | Pirkanmaa Hospital District, Tampere, Finland                                                                                                                                               | anaura@utu.fi                               | Clinical Groups | Oncology Group                 |
| Peeter Karhitala         | Northern Ostrobothnia Hospital District, Oulu, Finland                                                                                                                                      | peeter.karhitala@oulu.fi                    | Clinical Groups | Oncology Group                 |
| Päivi Auvinen            | Northern Savo Hospital District, Kuopio, Finland                                                                                                                                            | paivi.auvinen@kuh.fi                        | Clinical Groups | Oncology Group                 |
| Klaus Elenius            | Hospital District of Southwest Finland, Turku, Finland                                                                                                                                      | klaus.elenius@utu.fi                        | Clinical Groups | Oncology Group                 |
| Johanna Schleutker       | Hospital District of Southwest Finland, Turku, Finland                                                                                                                                      | johanna.schleutker@utu.fi                   | Clinical Groups | Oncology Group                 |
| Esa Pitkanen             | Institute for Molecular Medicine Finland (FIMM), HiLIFE, University of Helsinki, Helsinki, Finland                                                                                          | esa.pitkanen@helsinki.fi                    | Clinical Groups | Oncology Group                 |
| Nina Mars                | Institute for Molecular Medicine Finland (FIMM), HiLIFE, University of Helsinki, Helsinki, Finland                                                                                          | nina.mars@helsinki.fi                       | Clinical Groups | Oncology Group                 |
| Mark Daly                | Institute for Molecular Medicine Finland (FIMM), HiLIFE, University of Helsinki, Helsinki, Finland; Broad Institute of MIT and Harvard; Massachusetts General Hospital                      | mark.daly@helsinki.fi                       | Clinical Groups | Oncology Group                 |
| Relja Popovic            | Abbvie, Chicago, IL, United States                                                                                                                                                          | relja.popovic@abbvie.com                    | Clinical Groups | Oncology Group                 |
| Jeffrey Waring           | Abbvie, Chicago, IL, United States                                                                                                                                                          | jeff.waring@abbvie.com                      | Clinical Groups | Oncology Group                 |
| Bridget Riley-Gillis     | Abbvie, Chicago, IL, United States                                                                                                                                                          | bridget.rilevgillis@abbvie.com              | Clinical Groups | Oncology Group                 |
| Anne Lehtonen            | Abbvie, Chicago, IL, United States                                                                                                                                                          | anne.lehtonen@abbvie.com                    | Clinical Groups | Oncology Group                 |
| Margarete Fabre          | AstraZeneca, Cambridge, United Kingdom                                                                                                                                                      | martarete.fabre@astrazeneca.com             | Clinical Groups | Oncology Group                 |
| Jennifer Schutzman       | Genentech, San Francisco, CA, United States                                                                                                                                                 | schutzman.jennifer@gene.com                 | Clinical Groups | Oncology Group                 |
| Natalie Bowers           | Genentech, San Francisco, CA, United States                                                                                                                                                 | bowersn1@gene.com                           | Clinical Groups | Oncology Group                 |

|                            |                                                                                                                                                                                                              |                                       |                                |                                       |
|----------------------------|--------------------------------------------------------------------------------------------------------------------------------------------------------------------------------------------------------------|---------------------------------------|--------------------------------|---------------------------------------|
| Rion Pendergrass           | Genentech, San Francisco, CA, United States                                                                                                                                                                  | penders2@gene.com                     | Clinical Groups                | Oncology Group                        |
| Diptee Kulkarni            | GlaxoSmithKline, Brentford, United Kingdom                                                                                                                                                                   | diptee.a.kulkarni@gsk.com             | Clinical Groups                | Oncology Group                        |
| Kirsi Auro                 | GlaxoSmithKline, Espoo, Finland                                                                                                                                                                              | kirsi.m.auro@gsk.com                  | Clinical Groups                | Oncology Group                        |
| Alessandro Porello         | Janssen Research & Development, LLC, Spring House, PA, United States                                                                                                                                         | APorell@ITS.JNJ.com                   | Clinical Groups                | Oncology Group                        |
| Andrey Loboda              | Merck, Kenilworth, NJ, United States                                                                                                                                                                         | andrey_loboda@merck.com               | Clinical Groups                | Oncology Group                        |
| Heli Lehtonen              | Pfizer, New York, NY, United States                                                                                                                                                                          | heli.lehtonen@pfizer.com              | Clinical Groups                | Oncology Group                        |
| Stefan McDonough           | Pfizer, New York, NY, United States                                                                                                                                                                          | stefan.mcdonough@pfizer.com           | Clinical Groups                | Oncology Group                        |
| Sauli Vuoti                | Janssen-Cilag Oy, Espoo, Finland                                                                                                                                                                             | svuoti@its.jnj.com                    | Clinical Groups                | Oncology Group                        |
| Kai Kaamiranta             | Northern Savo Hospital District, Kuopio, Finland; Department of Molecular Genetics, University of Lodz, Lodz, Poland                                                                                         | kaikaamiranta@uef.fi                  | Clinical Groups                | Ophthalmology Group                   |
| Joni A Turunen             | Helsinki University Hospital and University of Helsinki, Helsinki, Finland; Eye Genetics Group, Folkhälsan Research Center, Helsinki, Finland                                                                | joni.turunen@helsinki.fi              | Clinical Groups                | Ophthalmology Group                   |
| Terhi Ollila               | Hospital District of Helsinki and Uusimaa, Helsinki, Finland                                                                                                                                                 | terhi.ollila@hus.fi                   | Clinical Groups                | Ophthalmology Group                   |
| Hannu Uusitalo             | Pirkanmaa Hospital District, Tampere, Finland                                                                                                                                                                | hannu.uusitalo@tuni.fi                | Clinical Groups                | Ophthalmology Group                   |
| Juha Karjalainen           | Institute for Molecular Medicine Finland (FIMM), HiLIFE, University of Helsinki, Helsinki, Finland                                                                                                           | juha.karjalainen@helsinki.fi          | Clinical Groups                | Ophthalmology Group                   |
| Esa Pitkanen               | Institute for Molecular Medicine Finland (FIMM), HiLIFE, University of Helsinki, Helsinki, Finland                                                                                                           | esa.pitkanen@helsinki.fi              | Clinical Groups                | Ophthalmology Group                   |
| Mengzhen Liu               | Abbvie, Chicago, IL, United States                                                                                                                                                                           | mengzhen.liu@abbvie.com               | Clinical Groups                | Ophthalmology Group                   |
| Heiko Runz                 | Biogen, Cambridge, MA, United States                                                                                                                                                                         | heiko.runz@biogen.com                 | Clinical Groups                | Ophthalmology Group                   |
| Stephanie Loomis           | Biogen, Cambridge, MA, United States                                                                                                                                                                         | stephanie.loomis@biogen.com           | Clinical Groups                | Ophthalmology Group                   |
| Erich Strauss              | Genentech, San Francisco, CA, United States                                                                                                                                                                  | strauss.erich@gene.com                | Clinical Groups                | Ophthalmology Group                   |
| Natalie Bowers             | Genentech, San Francisco, CA, United States                                                                                                                                                                  | bowersn1@gene.com                     | Clinical Groups                | Ophthalmology Group                   |
| Hao Chen                   | Genentech, San Francisco, CA, United States                                                                                                                                                                  | haoc@gene.com                         | Clinical Groups                | Ophthalmology Group                   |
| Rion Pendergrass           | Genentech, San Francisco, CA, United States                                                                                                                                                                  | penders2@gene.com                     | Clinical Groups                | Ophthalmology Group                   |
| Kaisa Tasanen              | Northern Ostrobothnia Hospital District, Oulu, Finland                                                                                                                                                       | kaisa.tasanen-maatta@oulu.fi          | Clinical Groups                | Dermatology Group                     |
| Laura Hullaja              | Northern Ostrobothnia Hospital District, Oulu, Finland                                                                                                                                                       | laura.hullaja@oulu.fi                 | Clinical Groups                | Dermatology Group                     |
| Katarina Hannula-Jouppi    | Hospital District of Helsinki and Uusimaa, Helsinki, Finland                                                                                                                                                 | katarina.hannula-jouppi@hus.fi        | Clinical Groups                | Dermatology Group                     |
| Teesa Salmi                | Pirkanmaa Hospital District, Tampere, Finland                                                                                                                                                                | teesa.salmi@pshp.fi                   | Clinical Groups                | Dermatology Group                     |
| Sirkku Peltonen            | Hospital District of Southwest Finland, Turku, Finland                                                                                                                                                       | sipello@utu.fi                        | Clinical Groups                | Dermatology Group                     |
| Leena Koutu                | Hospital District of Southwest Finland, Turku, Finland                                                                                                                                                       | leena.koutu@tyks.fi                   | Clinical Groups                | Dermatology Group                     |
| Nizar Smaoui               | Abbvie, Chicago, IL, United States                                                                                                                                                                           | nizar.smaoui@abbvie.com               | Clinical Groups                | Dermatology Group                     |
| Fedki Rahimov              | Abbvie, Chicago, IL, United States                                                                                                                                                                           | fedki.rahimov@abbvie.com              | Clinical Groups                | Dermatology Group                     |
| Anne Lehtonen              | Abbvie, Chicago, IL, United States                                                                                                                                                                           | anne.lehtonen@abbvie.com              | Clinical Groups                | Dermatology Group                     |
| David Choy                 | Genentech, San Francisco, CA, United States                                                                                                                                                                  | choy.david@gene.com                   | Clinical Groups                | Dermatology Group                     |
| Rion Pendergrass           | Genentech, San Francisco, CA, United States                                                                                                                                                                  | penders2@gene.com                     | Clinical Groups                | Dermatology Group                     |
| Dawn Waterworth            | Janssen Research & Development, LLC, Spring House, PA, United States                                                                                                                                         | dwaterwo@its.jnj.com                  | Clinical Groups                | Dermatology Group                     |
| Kirsi Kalpala              | Pfizer, New York, NY, United States                                                                                                                                                                          | kirsi.kalpala@pfizer.com              | Clinical Groups                | Dermatology Group                     |
| Ying Wu                    | Pfizer, New York, NY, United States                                                                                                                                                                          | ying.wu3@pfizer.com                   | Clinical Groups                | Dermatology Group                     |
| Pirkko Pussinen            | Hospital District of Helsinki and Uusimaa, Helsinki, Finland                                                                                                                                                 | pirkko.pussinen@helsinki.fi           | Clinical Groups                | Odontology Group                      |
| Aino Salminen              | Hospital District of Helsinki and Uusimaa, Helsinki, Finland                                                                                                                                                 | aino.m.salminen@helsinki.fi           | Clinical Groups                | Odontology Group                      |
| Tuula Salo                 | Hospital District of Helsinki and Uusimaa, Helsinki, Finland                                                                                                                                                 | tuula.salo@helsinki.fi                | Clinical Groups                | Odontology Group                      |
| David Rice                 | Hospital District of Helsinki and Uusimaa, Helsinki, Finland                                                                                                                                                 | david.rice@helsinki.fi                | Clinical Groups                | Odontology Group                      |
| Pekka Nieminen             | Hospital District of Helsinki and Uusimaa, Helsinki, Finland                                                                                                                                                 | pekka.nieminen@helsinki.fi            | Clinical Groups                | Odontology Group                      |
| Ulla Palotie               | Hospital District of Helsinki and Uusimaa, Helsinki, Finland                                                                                                                                                 | ulla.palotie@helsinki.fi              | Clinical Groups                | Odontology Group                      |
| Maria Siponen              | Northern Savo Hospital District, Kuopio, Finland                                                                                                                                                             | maria.siponen@uef.fi                  | Clinical Groups                | Odontology Group                      |
| Liisa Suominen             | Northern Savo Hospital District, Kuopio, Finland                                                                                                                                                             | liisa.suominen@uef.fi                 | Clinical Groups                | Odontology Group                      |
| Päivi Mäntylä              | Northern Savo Hospital District, Kuopio, Finland                                                                                                                                                             | paivi.mantyla@uef.fi                  | Clinical Groups                | Odontology Group                      |
| Ulvi Gursoy                | Hospital District of Southwest Finland, Turku, Finland                                                                                                                                                       | ulvi.gursoy@utu.fi                    | Clinical Groups                | Odontology Group                      |
| Vuokko Anttonen            | Northern Ostrobothnia Hospital District, Oulu, Finland                                                                                                                                                       | vuokko.anttonen@oulu.fi               | Clinical Groups                | Odontology Group                      |
| Kirsi Sipilä               | Research Unit of Oral Health Sciences Faculty of Medicine, University of Oulu, Oulu, Finland; Medical Research Center, Oulu, Oulu University Hospital and University of Oulu, Oulu, Finland                  | kirsi.sipila@oulu.fi                  | Clinical Groups                | Odontology Group                      |
| Rion Pendergrass           | Genentech, San Francisco, CA, United States                                                                                                                                                                  | penderrass.sarah@gene.com             | Clinical Groups                | Odontology Group                      |
| Hannele Laiuori            | Institute for Molecular Medicine Finland (FIMM), HiLIFE, University of Helsinki, Helsinki, Finland                                                                                                           | hannele.laiuori@helsinki.fi           | Clinical Groups                | Women's Health and Reproduction Group |
| Venla Kurra                | Pirkanmaa Hospital District, Tampere, Finland                                                                                                                                                                | venla.kurra@tuni.fi                   | Clinical Groups                | Women's Health and Reproduction Group |
| Laura Kotaniemi-Talonen    | Pirkanmaa Hospital District, Tampere, Finland                                                                                                                                                                | laura.kotaniemi-talonen@tuni.fi       | Clinical Groups                | Women's Health and Reproduction Group |
| Oskari Heikinheimo         | Hospital District of Helsinki and Uusimaa, Helsinki, Finland                                                                                                                                                 | oskari.heikinheimo@helsinki.fi        | Clinical Groups                | Women's Health and Reproduction Group |
| Ilkka Kalliala             | Hospital District of Helsinki and Uusimaa, Helsinki, Finland                                                                                                                                                 | ilkka.kalliala@hus.fi                 | Clinical Groups                | Women's Health and Reproduction Group |
| Lauri Aaltonen             | Hospital District of Helsinki and Uusimaa, Helsinki, Finland                                                                                                                                                 | lauri.aaltonen@helsinki.fi            | Clinical Groups                | Women's Health and Reproduction Group |
| Varpu Jokimaa              | Hospital District of Southwest Finland, Turku, Finland                                                                                                                                                       | varpu.jokimaa@utu.fi                  | Clinical Groups                | Women's Health and Reproduction Group |
| Johannes Kettunen          | Northern Ostrobothnia Hospital District, Oulu, Finland                                                                                                                                                       | Johannes.Kettunen@oulu.fi             | Clinical Groups                | Women's Health and Reproduction Group |
| Marja Väärasmäki           | Northern Ostrobothnia Hospital District, Oulu, Finland                                                                                                                                                       | marja.vaaraslaki@oulu.fi              | Clinical Groups                | Women's Health and Reproduction Group |
| Outi Uimari                | Northern Ostrobothnia Hospital District, Oulu, Finland                                                                                                                                                       | outi.uimari@oulu.fi                   | Clinical Groups                | Women's Health and Reproduction Group |
| Laure Morin-Papunen        | Northern Ostrobothnia Hospital District, Oulu, Finland                                                                                                                                                       | lmp@c.o.oulu.fi                       | Clinical Groups                | Women's Health and Reproduction Group |
| Maarit Niinimäki           | Northern Ostrobothnia Hospital District, Oulu, Finland                                                                                                                                                       | maarit.niinimaki@oulu.fi              | Clinical Groups                | Women's Health and Reproduction Group |
| Terhi Pitlonen             | Northern Ostrobothnia Hospital District, Oulu, Finland                                                                                                                                                       | terhi.pitlonen@oulu.fi                | Clinical Groups                | Women's Health and Reproduction Group |
| Katja Kivinen              | Institute for Molecular Medicine Finland (FIMM), HiLIFE, University of Helsinki, Helsinki, Finland                                                                                                           | katja.kivinen@helsinki.fi             | Clinical Groups                | Women's Health and Reproduction Group |
| Elisabeth Widen            | Institute for Molecular Medicine Finland (FIMM), HiLIFE, University of Helsinki, Helsinki, Finland                                                                                                           | elisabeth.widen@helsinki.fi           | Clinical Groups                | Women's Health and Reproduction Group |
| Taru Tukiainen             | Institute for Molecular Medicine Finland (FIMM), HiLIFE, University of Helsinki, Helsinki, Finland                                                                                                           | taru.tukiainen@helsinki.fi            | Clinical Groups                | Women's Health and Reproduction Group |
| Mary Pat Reeve             | Institute for Molecular Medicine Finland (FIMM), HiLIFE, University of Helsinki, Helsinki, Finland                                                                                                           | mary.reeve@helsinki.fi                | Clinical Groups                | Women's Health and Reproduction Group |
| Mark Daly                  | Institute for Molecular Medicine Finland (FIMM), HiLIFE, University of Helsinki, Helsinki, Finland; Broad Institute of MIT and Harvard; Massachusetts General Hospital                                       | mark.daly@helsinki.fi                 | Clinical Groups                | Women's Health and Reproduction Group |
| Niko Välimäki              | University of Helsinki, Helsinki, Finland                                                                                                                                                                    | niko.valimaki@helsinki.fi             | Clinical Groups                | Women's Health and Reproduction Group |
| Eija Laakkonen             | University of Jyväskylä, Jyväskylä, Finland                                                                                                                                                                  | eija.k.laakkonen@jyu.fi               | Clinical Groups                | Women's Health and Reproduction Group |
| Jaakko Tyrmä               | University of Oulu, Oulu, Finland / University of Tampere, Tampere, Finland                                                                                                                                  | jaakko.tyrmä@oulu.fi                  | Clinical Groups                | Women's Health and Reproduction Group |
| Heidi Silven               | University of Oulu, Oulu, Finland                                                                                                                                                                            | heidi.silven@student.oulu.fi          | Clinical Groups                | Women's Health and Reproduction Group |
| Eeva Silz                  | University of Oulu, Oulu, Finland                                                                                                                                                                            | eeva.silz@oulu.fi                     | Clinical Groups                | Women's Health and Reproduction Group |
| Riikka Affman              | University of Oulu, Oulu, Finland                                                                                                                                                                            | riikka.affman@oulu.fi                 | Clinical Groups                | Women's Health and Reproduction Group |
| Susanna Savukoski          | University of Oulu, Oulu, Finland                                                                                                                                                                            | susanna.savukoski@oulu.fi             | Clinical Groups                | Women's Health and Reproduction Group |
| Triin Laisk                | Estonian biobank, Tartu, Estonia                                                                                                                                                                             | triin.laisk@ut.ee                     | Clinical Groups                | Women's Health and Reproduction Group |
| Natalia Pujol              | Estonian biobank, Tartu, Estonia                                                                                                                                                                             | natalia.pujolquald@oulu.fi            | Clinical Groups                | Women's Health and Reproduction Group |
| Mengzhen Liu               | Abbvie, Chicago, IL, United States                                                                                                                                                                           | mengzhen.liu@abbvie.com               | Clinical Groups                | Women's Health and Reproduction Group |
| Bridget Riley-Gillis       | Abbvie, Chicago, IL, United States                                                                                                                                                                           | bridget.rileygillis@abbvie.com        | Clinical Groups                | Women's Health and Reproduction Group |
| Rion Pendergrass           | Genentech, San Francisco, CA, United States                                                                                                                                                                  | penders2@gene.com                     | Clinical Groups                | Women's Health and Reproduction Group |
| Janet Kumar                | GlaxoSmithKline, Colleeville, PA, United States                                                                                                                                                              | janet.x.kumar@gsk.com                 | Clinical Groups                | Women's Health and Reproduction Group |
| Kirsi Auro                 | GlaxoSmithKline, Espoo, Finland                                                                                                                                                                              | kirsi.m.auro@gsk.com                  | Clinical Groups                | Women's Health and Reproduction Group |
| Iris Hovatta               | University of Helsinki, Finland                                                                                                                                                                              | iris.hovatta@helsinki.fi              | Clinical Groups                | Depression group                      |
| Chia-Yen Chen              | Biogen, Cambridge, MA, United States                                                                                                                                                                         | chiayen.chen@biogen.com               | Clinical Groups                | Depression group                      |
| Erkki Isometsä             | Hospital District of Helsinki and Uusimaa, Helsinki, Finland                                                                                                                                                 | erkki.isometsa@hus.fi                 | Clinical Groups                | Depression group                      |
| Hanna Ollila               | Institute for Molecular Medicine Finland (FIMM), HiLIFE, University of Helsinki, Helsinki, Finland                                                                                                           | hanna.m.ollila@helsinki.fi            | Clinical Groups                | Depression group                      |
| Jaana Suvisaari            | Finnish Institute for Health and Welfare (THL), Helsinki, Finland                                                                                                                                            | jaana.suvisaari@thl.fi                | Clinical Groups                | Depression group                      |
| Antti Mäkitie              | Department of Otorhinolaryngology - Head and Neck Surgery, University of Helsinki and Helsinki University Hospital, Helsinki, Finland                                                                        | antti.makitie@helsinki.fi             | Clinical Groups                | ENT (ear, nose and throat) Group      |
| Argyro Bizaki-Vallaskangas | Pirkanmaa Hospital District, Tampere, Finland                                                                                                                                                                | argyro.bizaki-vallaskangas@tuni.fi    | Clinical Groups                | ENT (ear, nose and throat) Group      |
| Sanna Toppila-Salmi        | University of Eastern Finland and Kuopio University Hospital, Department of Otorhinolaryngology, Kuopio, Finland and Department of Allergy, Helsinki University Hospital and University of Helsinki, Finland | sanna.salmi@helsinki.fi               | Clinical Groups                | ENT (ear, nose and throat) Group      |
| Tytti Willberg             | Hospital District of Southwest Finland, Turku, Finland                                                                                                                                                       | tytti.willberg@tyks.fi                | Clinical Groups                | ENT (ear, nose and throat) Group      |
| Elmo Saarentaus            | Institute for Molecular Medicine Finland (FIMM), HiLIFE, University of Helsinki, Helsinki, Finland                                                                                                           | elmo.saarentaus@helsinki.fi           | Clinical Groups                | ENT (ear, nose and throat) Group      |
| Antti Aarnisalo            | Hospital District of Helsinki and Uusimaa, Helsinki, Finland                                                                                                                                                 | antti.aarnisalo@hus.fi                | Clinical Groups                | ENT (ear, nose and throat) Group      |
| Eveliina Salminen          | Hospital District of Helsinki and Uusimaa, Helsinki, Finland                                                                                                                                                 | eveliina.e.salminen@hus.fi            | Clinical Groups                | ENT (ear, nose and throat) Group      |
| Elsa Rahikkala             | Northern Ostrobothnia Hospital District, Oulu, Finland                                                                                                                                                       | eisa.rahikkala@ppshp.fi               | Clinical Groups                | ENT (ear, nose and throat) Group      |
| Johannes Kettunen          | Northern Ostrobothnia Hospital District, Oulu, Finland                                                                                                                                                       | johannes.kettunen@oulu.fi             | Clinical Groups                | ENT (ear, nose and throat) Group      |
| Kristiina Aittomäki        | Department of Medical Genetics, Helsinki University Central Hospital, Helsinki, Finland                                                                                                                      | kristiina.aittomaki@helsinki.fi       | Clinical Groups                | POI (premature ovarian failure) Group |
| Fredrik Åberg              | Transplantation and Liver Surgery Clinic, Helsinki University Hospital, Helsinki University, Helsinki, Finland                                                                                               | fredrik.aberg@helsinki.fi             | Clinical Groups                | LiverScore Group                      |
| Mitja Kurki                | Institute for Molecular Medicine Finland (FIMM), HiLIFE, University of Helsinki, Helsinki, Finland; Broad Institute, Cambridge, MA, United States                                                            | mkurki@broadinstitute.org             | FinnGen Analysis working group | FinnGen Analysis working group        |
| Samuli Ripatti             | Institute for Molecular Medicine Finland (FIMM), HiLIFE, University of Helsinki, Helsinki, Finland                                                                                                           | samuli.ripatti@helsinki.fi            | FinnGen Analysis working group | FinnGen Analysis working group        |
| Mark Daly                  | Institute for Molecular Medicine Finland (FIMM), HiLIFE, University of Helsinki, Helsinki, Finland; Broad Institute of MIT and Harvard; Massachusetts General Hospital                                       | mark.daly@helsinki.fi                 | FinnGen Analysis working group | FinnGen Analysis working group        |
| Juha Karjalainen           | Institute for Molecular Medicine Finland (FIMM), HiLIFE, University of Helsinki, Helsinki, Finland                                                                                                           | juha.karjalainen@helsinki.fi          | FinnGen Analysis working group | FinnGen Analysis working group        |
| Aki Havulinna              | Institute for Molecular Medicine Finland (FIMM), HiLIFE, University of Helsinki, Helsinki, Finland                                                                                                           | aki.havulinna@helsinki.fi             | FinnGen Analysis working group | FinnGen Analysis working group        |
| Juha Mehtonen              | Institute for Molecular Medicine Finland (FIMM), HiLIFE, University of Helsinki, Helsinki, Finland                                                                                                           | juha.mehtonen@helsinki.fi             | FinnGen Analysis working group | FinnGen Analysis working group        |
| Priit Palta                | Institute for Molecular Medicine Finland (FIMM), HiLIFE, University of Helsinki, Helsinki, Finland                                                                                                           | priit.palta@helsinki.fi               | FinnGen Analysis working group | FinnGen Analysis working group        |
| Shabbeer Hassan            | Institute for Molecular Medicine Finland (FIMM), HiLIFE, University of Helsinki, Helsinki, Finland                                                                                                           | shabbeer.hassan@helsinki.fi           | FinnGen Analysis working group | FinnGen Analysis working group        |
| Pietro Della Briotta Parol | Institute for Molecular Medicine Finland (FIMM), HiLIFE, University of Helsinki, Helsinki, Finland                                                                                                           | pietro.dellabriottaparolo@helsinki.fi | FinnGen Analysis working group | FinnGen Analysis working group        |
| Wei Zhou                   | Broad Institute, Cambridge, MA, United States                                                                                                                                                                | wzhou@broadinstitute.org              | FinnGen Analysis working group | FinnGen Analysis working group        |
| Mutaamba Maasha            | Broad Institute, Cambridge, MA, United States                                                                                                                                                                | mmaasha@broadinstitute.org            | FinnGen Analysis working group | FinnGen Analysis working group        |
| Shabbeer Hassan            | Institute for Molecular Medicine Finland (FIMM), HiLIFE, University of Helsinki, Helsinki, Finland                                                                                                           | shabbeer.hassan@helsinki.fi           | FinnGen Analysis working group | FinnGen Analysis working group        |
| Susanna Lemmela            | Institute for Molecular Medicine Finland (FIMM), HiLIFE, University of Helsinki, Helsinki, Finland                                                                                                           | susanna.lemmela@helsinki.fi           | FinnGen Analysis working group | FinnGen Analysis working group        |
| Manuel Rivas               | University of Stanford, Stanford, CA, United States                                                                                                                                                          | mrvivas@stanford.edu                  | FinnGen Analysis working group | FinnGen Analysis working group        |



|                             |                                                                                                                                                                                             |                                       |                                |                                |
|-----------------------------|---------------------------------------------------------------------------------------------------------------------------------------------------------------------------------------------|---------------------------------------|--------------------------------|--------------------------------|
| Aarno Palotie               | Institute for Molecular Medicine Finland (FIMM), HiLIFE, University of Helsinki, Helsinki                                                                                                   | aarno.palotie@helsinki.fi             | FinnGen Analysis working group | FinnGen Analysis working group |
| Aoxing Liu                  | Institute for Molecular Medicine Finland (FIMM), HiLIFE, University of Helsinki, Helsinki                                                                                                   | aoxing.liu@helsinki.fi                | FinnGen Analysis working group | FinnGen Analysis working group |
| Arto Lehto                  | Institute for Molecular Medicine Finland (FIMM), HiLIFE, University of Helsinki, Helsinki                                                                                                   | arto.lehto@helsinki.fi                | FinnGen Analysis working group | FinnGen Analysis working group |
| Andrea Ganna                | Institute for Molecular Medicine Finland (FIMM), HiLIFE, University of Helsinki, Helsinki                                                                                                   | aganna@broadinstitute.org             | FinnGen Analysis working group | FinnGen Analysis working group |
| Vincent Llorens             | Institute for Molecular Medicine Finland (FIMM), HiLIFE, University of Helsinki, Helsinki                                                                                                   | vincent.llorens@helsinki.fi           | FinnGen Analysis working group | FinnGen Analysis working group |
| Hannele Laiuvori            | Institute for Molecular Medicine Finland (FIMM), HiLIFE, University of Helsinki, Helsinki                                                                                                   | hannele.laiuvori@helsinki.fi          | FinnGen Analysis working group | FinnGen Analysis working group |
| Taru Tukiainen              | Institute for Molecular Medicine Finland (FIMM), HiLIFE, University of Helsinki, Helsinki                                                                                                   | taru.tukiainen@helsinki.fi            | FinnGen Analysis working group | FinnGen Analysis working group |
| Mary Pat Reeve              | Institute for Molecular Medicine Finland (FIMM), HiLIFE, University of Helsinki, Helsinki                                                                                                   | mary.reeve@helsinki.fi                | FinnGen Analysis working group | FinnGen Analysis working group |
| Henrike Heyne               | Institute for Molecular Medicine Finland (FIMM), HiLIFE, University of Helsinki, Helsinki                                                                                                   | heyne@broadinstitute.org              | FinnGen Analysis working group | FinnGen Analysis working group |
| Nina Mars                   | Institute for Molecular Medicine Finland (FIMM), HiLIFE, University of Helsinki, Helsinki                                                                                                   | nina.mars@helsinki.fi                 | FinnGen Analysis working group | FinnGen Analysis working group |
| Joel Rämö                   | Institute for Molecular Medicine Finland (FIMM), HiLIFE, University of Helsinki, Helsinki                                                                                                   | joel.ramo@helsinki.fi                 | FinnGen Analysis working group | FinnGen Analysis working group |
| Elmo Saarentaus             | Institute for Molecular Medicine Finland (FIMM), HiLIFE, University of Helsinki, Helsinki                                                                                                   | elmo.saarentaus@helsinki.fi           | FinnGen Analysis working group | FinnGen Analysis working group |
| Hanna Ollila                | Institute for Molecular Medicine Finland (FIMM), HiLIFE, University of Helsinki, Helsinki                                                                                                   | hanna.m.ollila@helsinki.fi            | FinnGen Analysis working group | FinnGen Analysis working group |
| Rodos Rodosthenous          | Institute for Molecular Medicine Finland (FIMM), HiLIFE, University of Helsinki, Helsinki                                                                                                   | rodos.rodosthenous@helsinki.fi        | FinnGen Analysis working group | FinnGen Analysis working group |
| Satu Strausz                | Institute for Molecular Medicine Finland (FIMM), HiLIFE, University of Helsinki, Helsinki                                                                                                   | satu.strausz@helsinki.fi              | FinnGen Analysis working group | FinnGen Analysis working group |
| Tuula Palotie               | University of Helsinki and Hospital District of Helsinki and Uusimaa, Helsinki, Finland                                                                                                     | tuula.palotie@helsinki.fi             | FinnGen Analysis working group | FinnGen Analysis working group |
| Kimmo Palin                 | University of Helsinki, Helsinki, Finland                                                                                                                                                   | kimmo.palin@helsinki.fi               | FinnGen Analysis working group | FinnGen Analysis working group |
| Javier Garcia-Tabuenca      | University of Tampere, Tampere, Finland                                                                                                                                                     | javier.graciatabuenca@tuni.fi         | FinnGen Analysis working group | FinnGen Analysis working group |
| Hari Siirtola               | University of Tampere, Tampere, Finland                                                                                                                                                     | hari.siirtola@tuni.fi                 | FinnGen Analysis working group | FinnGen Analysis working group |
| Tuomo Kiiskinen             | Institute for Molecular Medicine Finland (FIMM), HiLIFE, University of Helsinki, Helsinki                                                                                                   | tuomo.kiiskinen@helsinki.fi           | FinnGen Analysis working group | FinnGen Analysis working group |
| Jiwoo Lee                   | Institute for Molecular Medicine Finland (FIMM), HiLIFE, University of Helsinki, Helsinki, Finland; Broad Institute, Cambridge, MA, United States                                           | jiwoo.lee@helsinki.fi                 | FinnGen Analysis working group | FinnGen Analysis working group |
| Kristin Tsuo                | Institute for Molecular Medicine Finland (FIMM), HiLIFE, University of Helsinki, Helsinki, Finland; Broad Institute, Cambridge, MA, United States                                           | kristintsuo@fas.harvard.edu           | FinnGen Analysis working group | FinnGen Analysis working group |
| Amanda Elliott              | Institute for Molecular Medicine Finland (FIMM), HiLIFE, University of Helsinki, Helsinki, Finland; Broad Institute, Cambridge, MA, USA and Massachusetts General Hospital, Boston, MA, USA | aelliott@broadinstitute.org           | FinnGen Analysis working group | FinnGen Analysis working group |
| Kati Kristiansson           | THL Biobank / Finnish Institute for Health and Welfare (THL), Helsinki, Finland                                                                                                             | kati.kristiansson@thl.fi              | FinnGen Analysis working group | FinnGen Analysis working group |
| Mikko Arvas                 | Finnish Red Cross Blood Service / Finnish Hematology Registry and Clinical Biobank, Helsinki, Finland                                                                                       | mikko.arvas@veripalvelu.fi            | FinnGen Analysis working group | FinnGen Analysis working group |
| Kati Hyvärinen              | Finnish Red Cross Blood Service, Helsinki, Finland                                                                                                                                          | kati.hyvarinen@veripalvelu.fi         | FinnGen Analysis working group | FinnGen Analysis working group |
| Jarmo Ritari                | Finnish Red Cross Blood Service, Helsinki, Finland                                                                                                                                          | jarmo.ritari@veripalvelu.fi           | FinnGen Analysis working group | FinnGen Analysis working group |
| Olli Carpén                 | Helsinki Biobank / Helsinki University and Hospital District of Helsinki and Uusimaa, Helsinki                                                                                              | oli.carpén@helsinki.fi                | FinnGen Analysis working group | FinnGen Analysis working group |
| Johannes Kettunen           | Northern Finland Biobank Borealis / University of Oulu / Northern Ostrobothnia Hospital District, Oulu, Finland                                                                             | johannes.kettunen@oulu.fi             | FinnGen Analysis working group | FinnGen Analysis working group |
| Katri Pylkäs                | University of Oulu, Oulu, Finland                                                                                                                                                           | katri.pylkas@oulu.fi                  | FinnGen Analysis working group | FinnGen Analysis working group |
| Eeva Sliz                   | University of Oulu, Oulu, Finland                                                                                                                                                           | eeva.sliz@oulu.fi                     | FinnGen Analysis working group | FinnGen Analysis working group |
| Minna Karjalainen           | University of Oulu, Oulu, Finland                                                                                                                                                           | minna.karjalainen@oulu.fi             | FinnGen Analysis working group | FinnGen Analysis working group |
| Tuomo Mantere               | Northern Finland Biobank Borealis / University of Oulu / Northern Ostrobothnia Hospital District, Oulu, Finland                                                                             | tuomo.mantere@oulu.fi                 | FinnGen Analysis working group | FinnGen Analysis working group |
| Eeva Kangasniemi            | Finnish Clinical Biobank Tampere / University of Tampere / Pirkanmaa Hospital District, Tampere, Finland                                                                                    | eeva.kangasniemi@pshp.fi              | FinnGen Analysis working group | FinnGen Analysis working group |
| Sami Heikkinen              | University of Eastern Finland, Kuopio, Finland                                                                                                                                              | sami.heikkinen@uef.fi                 | FinnGen Analysis working group | FinnGen Analysis working group |
| Arto Mannermaa              | Biobank of Eastern Finland / University of Eastern Finland / Northern Savo Hospital District, Kuopio, Finland                                                                               | arto.mannermaa@uef.fi                 | FinnGen Analysis working group | FinnGen Analysis working group |
| Eija Laakkonen              | University of Jyväskylä, Jyväskylä, Finland                                                                                                                                                 | eija.laakkonen@jyu.fi                 | FinnGen Analysis working group | FinnGen Analysis working group |
| Nina Pitkanen               | Auria Biobank / University of Turku / Hospital District of Southwest Finland, Turku, Finland                                                                                                | Niina.Pitkanen@tyks.fi                | FinnGen Analysis working group | FinnGen Analysis working group |
| Samuel Lessard              | Translational Sciences, Sanofi R&D, Framingham, MA, USA                                                                                                                                     | samuel.lessard@sanofi.com             | FinnGen Analysis working group | FinnGen Analysis working group |
| Clément Chatelain           | Translational Sciences, Sanofi R&D, Framingham, MA, USA                                                                                                                                     | clement.chatelain@sanofi.com          | FinnGen Analysis working group | FinnGen Analysis working group |
| Lila Kallio                 | Auria Biobank / University of Turku / Hospital District of Southwest Finland, Turku, Finland                                                                                                | Lila.Kallio@tyks.fi                   | Biobank directors              | Biobank directors              |
| Tiina Wahlfors              | THL Biobank / Finnish Institute for Health and Welfare (THL), Helsinki, Finland                                                                                                             | tiina.wahlfors@thl.fi                 | Biobank directors              | Biobank directors              |
| Jukka Partanen              | Finnish Red Cross Blood Service / Finnish Hematology Registry and Clinical Biobank, Helsinki, Finland                                                                                       | jukka.partanen@veripalvelu.fi         | Biobank directors              | Biobank directors              |
| Eero Punkka                 | Helsinki Biobank / Helsinki University and Hospital District of Helsinki and Uusimaa, Helsinki                                                                                              | eero.punkka@hus.fi                    | Biobank directors              | Biobank directors              |
| Raisa Serpi                 | Northern Finland Biobank Borealis / University of Oulu / Northern Ostrobothnia Hospital District, Oulu, Finland                                                                             | raisa.serpi@pshp.fi                   | Biobank directors              | Biobank directors              |
| Sanna Siltanen              | Finnish Clinical Biobank Tampere / University of Tampere / Pirkanmaa Hospital District, Tampere, Finland                                                                                    | sanna.siltanen@pshp.fi                | Biobank directors              | Biobank directors              |
| Veli-Matti Kosma            | Biobank of Eastern Finland / University of Eastern Finland / Northern Savo Hospital District, Kuopio, Finland                                                                               | veli-matti.kosma@uef.fi               | Biobank directors              | Biobank directors              |
| Teijo Kuopio                | Central Finland Biobank / University of Jyväskylä / Central Finland Health Care District, Jyväskylä, Finland                                                                                | teijo.kuopio@ksshp.fi                 | Biobank directors              | Biobank directors              |
| Anu Jalanko                 | Institute for Molecular Medicine Finland (FIMM), HiLIFE, University of Helsinki, Helsinki                                                                                                   | anujalanko@helsinki.fi                | FinnGen Teams                  | Administration                 |
| Huei-Yi Shen                | Institute for Molecular Medicine Finland (FIMM), HiLIFE, University of Helsinki, Helsinki                                                                                                   | huei-yi.shen@helsinki.fi              | FinnGen Teams                  | Administration                 |
| Risto Kajanne               | Institute for Molecular Medicine Finland (FIMM), HiLIFE, University of Helsinki, Helsinki                                                                                                   | risto.kajanne@helsinki.fi             | FinnGen Teams                  | Administration                 |
| Mervi Aavikko               | Institute for Molecular Medicine Finland (FIMM), HiLIFE, University of Helsinki, Helsinki                                                                                                   | mervi.aavikko@helsinki.fi             | FinnGen Teams                  | Administration                 |
| Helen Cooper                | Institute for Molecular Medicine Finland (FIMM), HiLIFE, University of Helsinki, Helsinki                                                                                                   | helen.cooper@helsinki.fi              | FinnGen Teams                  | Administration                 |
| Denise Öller                | Institute for Molecular Medicine Finland (FIMM), HiLIFE, University of Helsinki, Helsinki                                                                                                   | denise.oller@helsinki.fi              | FinnGen Teams                  | Administration                 |
| Rasko Leinonen              | Institute for Molecular Medicine Finland (FIMM), HiLIFE, University of Helsinki, Helsinki                                                                                                   | rasko@ebi.ac.uk                       | FinnGen Teams                  | Administration                 |
| Henna Palin                 | Finnish Clinical Biobank Tampere / University of Tampere / Pirkanmaa Hospital District, Tampere, Finland                                                                                    | henna.palin@pshp.fi                   | FinnGen Teams                  | Administration                 |
| Malla-Maria Linna           | Helsinki Biobank / Helsinki University and Hospital District of Helsinki and Uusimaa, Helsinki                                                                                              | malla-maria.linna@hus.fi              | FinnGen Teams                  | Administration                 |
| Mitja Kurki                 | Institute for Molecular Medicine Finland (FIMM), HiLIFE, University of Helsinki, Helsinki, Finland; Broad Institute, Cambridge, MA, United States                                           | mkurki@broadinstitute.org             | FinnGen Teams                  | Analysis                       |
| Juha Karjalainen            | Institute for Molecular Medicine Finland (FIMM), HiLIFE, University of Helsinki, Helsinki                                                                                                   | juha.karjalainen@helsinki.fi          | FinnGen Teams                  | Analysis                       |
| Pietro Della Briotta Parolo | Institute for Molecular Medicine Finland (FIMM), HiLIFE, University of Helsinki, Helsinki                                                                                                   | pietro.dellabriottaparolo@helsinki.fi | FinnGen Teams                  | Analysis                       |
| Arto Lehto                  | Institute for Molecular Medicine Finland (FIMM), HiLIFE, University of Helsinki, Helsinki                                                                                                   | arto.lehto@helsinki.fi                | FinnGen Teams                  | Analysis                       |
| Juha Mehtonen               | Institute for Molecular Medicine Finland (FIMM), HiLIFE, University of Helsinki, Helsinki                                                                                                   | juha.mehtonen@helsinki.fi             | FinnGen Teams                  | Analysis                       |
| Wei Zhou                    | Broad Institute, Cambridge, MA, United States                                                                                                                                               | wzhou@broadinstitute.org              | FinnGen Teams                  | Analysis                       |
| Masahiro Kanai              | Broad Institute, Cambridge, MA, United States                                                                                                                                               | mkanai@broadinstitute.org             | FinnGen Teams                  | Analysis                       |
| Mutaamba Maasha             | Broad Institute, Cambridge, MA, United States                                                                                                                                               | mmaasha@broadinstitute.org            | FinnGen Teams                  | Analysis                       |
| Zhuli Zheng                 | Broad Institute, Cambridge, MA, United States                                                                                                                                               | zhengzhi@broadinstitute.org           | FinnGen Teams                  | Analysis                       |
| Hannele Laiuvori            | Institute for Molecular Medicine Finland (FIMM), HiLIFE, University of Helsinki, Helsinki                                                                                                   | hannele.laiuvori@helsinki.fi          | FinnGen Teams                  | Clinical Endpoint Development  |
| Aki Havulinna               | Institute for Molecular Medicine Finland (FIMM), HiLIFE, University of Helsinki, Helsinki                                                                                                   | aki.havulinna@helsinki.fi             | FinnGen Teams                  | Clinical Endpoint Development  |
| Susanna Lemmelä             | Institute for Molecular Medicine Finland (FIMM), HiLIFE, University of Helsinki, Helsinki                                                                                                   | susanna.lemmela@helsinki.fi           | FinnGen Teams                  | Clinical Endpoint Development  |
| Tuomo Kiiskinen             | Institute for Molecular Medicine Finland (FIMM), HiLIFE, University of Helsinki, Helsinki                                                                                                   | tuomo.kiiskinen@helsinki.fi           | FinnGen Teams                  | Clinical Endpoint Development  |
| L. Elissa Lahtela           | Institute for Molecular Medicine Finland (FIMM), HiLIFE, University of Helsinki, Helsinki                                                                                                   | laura.lahtela@helsinki.fi             | FinnGen Teams                  | Clinical Endpoint Development  |
| Mari Kaunisto               | Institute for Molecular Medicine Finland (FIMM), HiLIFE, University of Helsinki, Helsinki                                                                                                   | maria.kaunisto@helsinki.fi            | FinnGen Teams                  | Communication                  |
| Elina Kilpeläinen           | Institute for Molecular Medicine Finland (FIMM), HiLIFE, University of Helsinki, Helsinki                                                                                                   | elina.kilpelainen@helsinki.fi         | FinnGen Teams                  | E-Science                      |
| Timo P. Sipilä              | Institute for Molecular Medicine Finland (FIMM), HiLIFE, University of Helsinki, Helsinki                                                                                                   | timo.p.sipila@helsinki.fi             | FinnGen Teams                  | E-Science                      |
| Oluwaseun Alexander Dada    | Institute for Molecular Medicine Finland (FIMM), HiLIFE, University of Helsinki, Helsinki                                                                                                   | oluwaseun.dada@helsinki.fi            | FinnGen Teams                  | E-Science                      |
| Awaisa Ghazal               | Institute for Molecular Medicine Finland (FIMM), HiLIFE, University of Helsinki, Helsinki                                                                                                   | awaisa.ghazal@helsinki.fi             | FinnGen Teams                  | E-Science                      |
| Anastasia Kytölä            | Institute for Molecular Medicine Finland (FIMM), HiLIFE, University of Helsinki, Helsinki                                                                                                   | anastasia.scherban@helsinki.fi        | FinnGen Teams                  | E-Science                      |
| Rigbe Weldatsadik           | Institute for Molecular Medicine Finland (FIMM), HiLIFE, University of Helsinki, Helsinki                                                                                                   | rigbe.weldatsadik@helsinki.fi         | FinnGen Teams                  | E-Science                      |
| Sanni Ruotsalainen          | Institute for Molecular Medicine Finland (FIMM), HiLIFE, University of Helsinki, Helsinki                                                                                                   | sanni.ruotsalainen@helsinki.fi        | FinnGen Teams                  | E-Science                      |
| Kati Donner                 | Institute for Molecular Medicine Finland (FIMM), HiLIFE, University of Helsinki, Helsinki                                                                                                   | kati.donner@helsinki.fi               | FinnGen Teams                  | Genotyping                     |
| Timo P. Sipilä              | Institute for Molecular Medicine Finland (FIMM), HiLIFE, University of Helsinki, Helsinki                                                                                                   | timo.p.sipila@helsinki.fi             | FinnGen Teams                  | Genotyping                     |
| Anu Loukola                 | Helsinki Biobank / Helsinki University and Hospital District of Helsinki and Uusimaa, Helsinki                                                                                              | anu.loukola@hus.fi                    | FinnGen Teams                  | Sample Collection Coordination |
| Päivi Laihio                | THL Biobank / Finnish Institute for Health and Welfare (THL), Helsinki, Finland                                                                                                             | paivi.laihio@thl.fi                   | FinnGen Teams                  | Sample Logistics               |
| Tuuli Sistonen              | THL Biobank / Finnish Institute for Health and Welfare (THL), Helsinki, Finland                                                                                                             | tuuli.sistonen@thl.fi                 | FinnGen Teams                  | Sample Logistics               |
| Essi Kaiharju               | THL Biobank / Finnish Institute for Health and Welfare (THL), Helsinki, Finland                                                                                                             | essi.kaiharju@thl.fi                  | FinnGen Teams                  | Sample Logistics               |
| Markku Laukkanen            | THL Biobank / Finnish Institute for Health and Welfare (THL), Helsinki, Finland                                                                                                             | markku.laukkanen@thl.fi               | FinnGen Teams                  | Sample Logistics               |
| Eina Järvensivu             | THL Biobank / Finnish Institute for Health and Welfare (THL), Helsinki, Finland                                                                                                             | eina.jarvensivu@thl.fi                | FinnGen Teams                  | Sample Logistics               |
| Sini Lähteenmäki            | THL Biobank / Finnish Institute for Health and Welfare (THL), Helsinki, Finland                                                                                                             | sini.lahteenmaki@thl.fi               | FinnGen Teams                  | Sample Logistics               |
| Lotta Männikkö              | THL Biobank / Finnish Institute for Health and Welfare (THL), Helsinki, Finland                                                                                                             | lotta.mannikko@thl.fi                 | FinnGen Teams                  | Sample Logistics               |
| Regis Wong                  | THL Biobank / Finnish Institute for Health and Welfare (THL), Helsinki, Finland                                                                                                             | regis.wong@thl.fi                     | FinnGen Teams                  | Sample Logistics               |
| Auli Toivola                | THL Biobank / Finnish Institute for Health and Welfare (THL), Helsinki, Finland                                                                                                             | auli.toivola@thl.fi                   | FinnGen Teams                  | Sample Logistics               |
| Minna Brunfeldt             | THL Biobank / Finnish Institute for Health and Welfare (THL), Helsinki, Finland                                                                                                             | minna.brunfeldt@thl.fi                | FinnGen Teams                  | Registry Data Operations       |
| Hannele Mattsson            | THL Biobank / Finnish Institute for Health and Welfare (THL), Helsinki, Finland                                                                                                             | hannele.mattsson@thl.fi               | FinnGen Teams                  | Registry Data Operations       |
| Kati Kristiansson           | THL Biobank / Finnish Institute for Health and Welfare (THL), Helsinki, Finland                                                                                                             | kati.kristiansson@thl.fi              | FinnGen Teams                  | Registry Data Operations       |
| Susanna Lemmelä             | Institute for Molecular Medicine Finland (FIMM), HiLIFE, University of Helsinki, Helsinki                                                                                                   | susanna.lemmela@helsinki.fi           | FinnGen Teams                  | Registry Data Operations       |
| Sami Koskelainen            | THL Biobank / Finnish Institute for Health and Welfare (THL), Helsinki, Finland                                                                                                             | sami.koskelainen@thl.fi               | FinnGen Teams                  | Registry Data Operations       |
| Tero Hiekkalaina            | THL Biobank / Finnish Institute for Health and Welfare (THL), Helsinki, Finland                                                                                                             | tero.hiekkalaina@helsinki.fi          | FinnGen Teams                  | Registry Data Operations       |
| Teemu Paajanen              | THL Biobank / Finnish Institute for Health and Welfare (THL), Helsinki, Finland                                                                                                             | teemu.paajanen@thl.fi                 | FinnGen Teams                  | Registry Data Operations       |
| Priit Palta                 | Institute for Molecular Medicine Finland (FIMM), HiLIFE, University of Helsinki, Helsinki                                                                                                   | priit.palta@helsinki.fi               | FinnGen Teams                  | Sequencing Informatics         |
| Shuang Luo                  | Institute for Molecular Medicine Finland (FIMM), HiLIFE, University of Helsinki, Helsinki                                                                                                   | shuang.luo@helsinki.fi                | FinnGen Teams                  | Sequencing Informatics         |
| Tarja Laitinen              | Pirkanmaa Hospital District, Tampere, Finland                                                                                                                                               | tarja.laitinen@pshp.fi                | FinnGen Teams                  | Trajectory                     |

|                        |                                                                                           |                               |                               |                                     |
|------------------------|-------------------------------------------------------------------------------------------|-------------------------------|-------------------------------|-------------------------------------|
| Mary Pat Reeve         | Institute for Molecular Medicine Finland (FIMM), HiLIFE, University of Helsinki, Helsinki | mary.reeve@helsinki.fi        | <a href="#">FinnGen Teams</a> | Trajectory                          |
| Shanmukha Sampath      | Institute for Molecular Medicine Finland (FIMM), HiLIFE, University of Helsinki, Helsinki | sam.padmanabhuni@helsinki.fi  | <a href="#">FinnGen Teams</a> | Trajectory                          |
| Marianna Niemi         | University of Tampere, Tampere, Finland                                                   | marianna.niemi@tuni.fi        | <a href="#">FinnGen Teams</a> | Trajectory                          |
| Harri Siirtola         | University of Tampere, Tampere, Finland                                                   | harri.siirtola@tuni.fi        | <a href="#">FinnGen Teams</a> | Trajectory                          |
| Javier Gracia-Tabuenca | University of Tampere, Tampere, Finland                                                   | javier.graciatabuenca@tuni.fi | <a href="#">FinnGen Teams</a> | Trajectory                          |
| Mika Helminen          | University of Tampere, Tampere, Finland                                                   | mika.helminen@tuni.fi         | <a href="#">FinnGen Teams</a> | Trajectory                          |
| Tiina Luukkaala        | University of Tampere, Tampere, Finland                                                   | tiina.luukkaala@tuni.fi       | <a href="#">FinnGen Teams</a> | Trajectory                          |
| Iida Vähätalo          | University of Tampere, Tampere, Finland                                                   | iida.vahatalo@epshp.fi        | <a href="#">FinnGen Teams</a> | Trajectory                          |
| Jyrki Tammerluoto      | Institute for Molecular Medicine Finland (FIMM), HiLIFE, University of Helsinki, Helsinki | jyrki.tammerluoto@helsinki.fi | <a href="#">FinnGen Teams</a> | Trajectory                          |
| Marco Hautalahti       | Finnish Biobank Cooperative - FINBB                                                       | marco.hautalahti@finbb.fi     | <a href="#">FinnGen Teams</a> | Data protection officer             |
| Johanna Mäkelä         | Finnish Biobank Cooperative - FINBB                                                       | johanna.makela@finbb.fi       | <a href="#">FinnGen Teams</a> | FINBB - Finnish biobank cooperative |
| Sarah Smith            | Finnish Biobank Cooperative - FINBB                                                       | sarah.smith@finbb.fi          | <a href="#">FinnGen Teams</a> | FINBB - Finnish biobank cooperative |
| Tom Southerington      | Finnish Biobank Cooperative - FINBB                                                       | tom.southerington@finbb.fi    | <a href="#">FinnGen Teams</a> | FINBB - Finnish biobank cooperative |
| Petri Lehto            | Finnish Biobank Cooperative - FINBB                                                       | petri.lehto@finbb.fi          | <a href="#">FinnGen Teams</a> | FINBB - Finnish biobank cooperative |
